# Supplementary material for: New Zileuton-Hydroxycinnamic Acid Hybrids: Synthesis and Structure-Activity Relationship towards 5-Lipoxygenase Inhibition
Source: PubMed Central journal article supplement (PMC7587396; doi:10.3390/molecules25204686), 2020-10-14

Supporting Information

To accompany

# **New Zileuton-Hydroxycinnamic Acid Hybrids: Synthesis and Structure-Activity Relationship towards 5-Lipoxygenase Inhibition**

**Audrey Isabel Chiasson, Samuel Robichaud, Fanta J. Ndongou Moutombi, Mathieu P.A. Hébert, Maroua Mbarik, Marc E. Surette and Mohamed Touaibia \***

Department of Chemistry and Biochemistry, Université de Moncton, Moncton, NB E1A 3E9, Canada

\*Corresponding author. E-mail address: [mohamed.touaibia@umoncton.ca](mailto:mohamed.touaibia@umoncton.ca)

### 3-Phenylpropyl 1-benzothiophene-2-carboxylate (6)

Following our general procedure esterification with thianaphtene-2-carboxylic acid (**3**) (500 mg, 2.81 mmol, 1 eq), Na<sub>2</sub>CO<sub>3</sub> (356 mg, 3.36 mmol, 1.2 eq), and 1-bromo-3-phenylpropane (0.51 mL, 3.36 mmol, 1.2 eq) compound **6** was obtained as a yellow oil after flash chromatography (8% EtOAc/Hex), yield = 20%, R<sub>f</sub> = 0.46 (10% EtOAc/Hex). <sup>1</sup>H-NMR (400 MHz, CDCl<sub>3</sub>, 25°C); δ (ppm): 8.07 (s, 1H, H<sub>3</sub>), 7.92-7.88 (t, 2H, J = 7.0 Hz, H<sub>4</sub>, H<sub>7</sub>), 7.51-7.22 (m, 7H, H<sub>5</sub>, H<sub>6</sub>, H<sub>2'</sub>, H<sub>3'</sub>, H<sub>4'</sub>, H<sub>5'</sub>, H<sub>6'</sub>), 4.41-4.38 (t, 2H, J = 7.0 Hz, OCH<sub>2</sub>CH<sub>2</sub>CH<sub>2</sub>C), 2.85-2.82 (t, 2H, J = 7.0 Hz, CH<sub>2</sub>CH<sub>2</sub>CH<sub>2</sub>C), 2.19-2.12 (quint., 2H, J = 7.0 Hz, CH<sub>2</sub>CH<sub>2</sub>CH<sub>2</sub>C). <sup>13</sup>C-NMR (101 MHz, CDCl<sub>3</sub>, 25°C); δ (ppm): 162.81 (C=O), 142.24 (C<sub>7a</sub>), 141.06 (C<sub>3a</sub>), 138.74 (C<sub>2</sub>), 133.70 (C<sub>1'</sub>), 130.48 (C<sub>3'</sub>, C<sub>5'</sub>), 128.51 (C<sub>2'</sub>, C<sub>6'</sub>), 128.48 (C<sub>4'</sub>), 126.93 (C<sub>6</sub>), 126.09 (C<sub>5</sub>), 125.55 (C<sub>7</sub>), 124.91 (C<sub>4</sub>), 122.77 (C<sub>2</sub>), 64.78 (OCH<sub>2</sub>CH<sub>2</sub>CH<sub>2</sub>C), 32.19 (OCH<sub>2</sub>CH<sub>2</sub>CH<sub>2</sub>C), 30.24 (OCH<sub>2</sub>CH<sub>2</sub>CH<sub>2</sub>C). HRMS *m/z* calc. for C<sub>18</sub>H<sub>16</sub>O<sub>2</sub>S + (H<sup>+</sup>): 297.0944; found: 297.0945.

### 4-Phenylbutyl 1-benzothiophene-2-carboxylate (7)

Following our general procedure esterification with thianaphtene-2-carboxylic acid (**3**) (250 mg, 1.40 mmol, 1 eq), Na<sub>2</sub>CO<sub>3</sub> (178 mg, 1.68 mmol, 1.2 eq), and 1-bromo-4-phenylbutane (358 mg, 1.68 mmol, 1.2 eq) compound **7** was obtained as a yellow solid after flash chromatography (8% EtOAc/Hex), yield = 62%, R<sub>f</sub> = 0,61 (10% EtOAc/Hex), m.p.= 56-57°C. <sup>1</sup>H-NMR (400 MHz, CDCl<sub>3</sub>, 25°C); δ (ppm): 8.08 (s, 1H, H<sub>3</sub>), 7.91-7.88 (t, 2H, J = 7.0 Hz, H<sub>4</sub>, H<sub>7</sub>), 7.50-7.20 (m, 7H, H<sub>5</sub>, H<sub>6</sub>, H<sub>2'</sub>, H<sub>3'</sub>, H<sub>4'</sub>, H<sub>5'</sub>, H<sub>6'</sub>), 4.41-4.38 (t, 2H, J = 6.0 Hz, OCH<sub>2</sub>CH<sub>2</sub>CH<sub>2</sub>CH<sub>2</sub>), 2.75-2.71 (t, 2H, J = 7.0 Hz, CH<sub>2</sub>CH<sub>2</sub>CH<sub>2</sub>CH<sub>2</sub>C), 1.87-1.82 (m, 4H, CH<sub>2</sub>CH<sub>2</sub>CH<sub>2</sub>CH<sub>2</sub>C). <sup>13</sup>C-NMR (101 MHz, CDCl<sub>3</sub>, 25°C); δ (ppm) : 162.87 (C=O), 142.22 (C<sub>7a</sub>), 141.98 (C<sub>3a</sub>), 138.74 (C<sub>2</sub>), 133.78 (C<sub>1'</sub>), 130.42 (C<sub>3'</sub>, C<sub>5'</sub>), 128.43 (C<sub>2'</sub>, C<sub>6'</sub>), 128.39 (C<sub>4'</sub>), 126.90 (C<sub>6</sub>), 125.89 (C<sub>5</sub>), 125.53 (C<sub>4</sub>), 124.89 (C<sub>7</sub>), 122.76 (C<sub>3</sub>), 65.43 (CH<sub>2</sub>CH<sub>2</sub>CH<sub>2</sub>CH<sub>2</sub>C), 35.46 (CH<sub>2</sub>CH<sub>2</sub>CH<sub>2</sub>CH<sub>2</sub>C), 28.27 (CH<sub>2</sub>CH<sub>2</sub>CH<sub>2</sub>CH<sub>2</sub>C), 27.74 (CH<sub>2</sub>CH<sub>2</sub>CH<sub>2</sub>CH<sub>2</sub>C). HRMS *m/z* calc. for C<sub>19</sub>H<sub>18</sub>O<sub>2</sub>S + (H<sup>+</sup>): 311.1100; found: 311.1098.

### 2-(*p*-Methoxyphenyl)ethyl 1-benzothiophene-2-carboxylate (8)

Following our general procedure esterification with thianaphtene-2-carboxylic acid (**3**) (250 mg, 1.40 mmol, 1 eq), Na<sub>2</sub>CO<sub>3</sub> (178 mg, 1.68 mmol, 1.2 eq), and 4-methoxyphenethylbromide (361 mg, 1.68 mmol, 1.2 eq) compound **8** was obtained as a pink solid after flash chromatography (10% EtOAc/Hex), yield = 76%, R<sub>f</sub> = 0,48 (10% EtOAc/Hex), m.p.= 98-99°C. <sup>1</sup>H-NMR (400 MHz, CDCl<sub>3</sub>, 25°C); δ (ppm): 8.07 (s, 1H, H<sub>3</sub>), 7.91-7.89 (m, 2H, H<sub>4</sub>, H<sub>7</sub>), 7.50-7.41 (m, 2H, H<sub>5</sub>, H<sub>6</sub>), 7.28-7.24 (m, 2H, H<sub>2'</sub>, H<sub>6'</sub>), 6.91-6.89 (d, 2H, J = 8.0 Hz, H<sub>3'</sub>, H<sub>5'</sub>) 4.56-4.52 (t, 2H, J = 7.0 Hz, OCH<sub>2</sub>CH<sub>2</sub>C), 3.82 (s, 3H, OCH<sub>3</sub>), 3.08-3.05 (t, 2H, J = 7.0 Hz, OCH<sub>2</sub>CH<sub>2</sub>C). <sup>13</sup>C-NMR (101 MHz, CDCl<sub>3</sub>, 25°C); δ (ppm): 162.72 (C=O), 158.42 (C<sub>4'</sub>), 142.25 (C<sub>7a</sub>), 138.72 (C<sub>3a</sub>), 133.64 (C<sub>2</sub>), 130.53 (C<sub>1'</sub>), 130.01 (C<sub>2'</sub>, C<sub>6'</sub>), 129.67 (C<sub>6</sub>), 126.94 (C<sub>5</sub>), 125.56 (C<sub>4</sub>), 124.90 (C<sub>7</sub>), 122.77 (C<sub>3</sub>), 114.01 (C<sub>3'</sub>, C<sub>5'</sub>), 66.26 (OCH<sub>2</sub>CH<sub>2</sub>C), 55.27 (OCH<sub>3</sub>), 34.35 (OCH<sub>2</sub>CH<sub>2</sub>C). HRMS *m/z* calc. for C<sub>18</sub>H<sub>16</sub>O<sub>3</sub>S + (Na<sup>+</sup>): 335.0712; found: 335.0705.

### 2-(*p*-Hydroxyphenyl)ethyl 1-benzothiophene-2-carboxylate (9)

Following our general procedure esterification with thianaphtene-2-carboxylic acid (**3**) (184 mg, 1.00 mmol, 1 eq),

Na<sub>2</sub>CO<sub>3</sub> (127 mg, 1.20 mmol, 1.2 eq), and 4-hydroxyphenethylbromide (250 mg, 1.2 mmol, 1.2 eq) compound **9** was obtained as an orange solid after flash chromatography (15% EtOAc/Hex), yield = 57%, R<sub>f</sub> = 0,40 (10% EtOAc/Hex), m.p.= 142-143°C. <sup>1</sup>H-NMR (400 MHz, CDCl<sub>3</sub>, 25°C); δ (ppm) : 8.07 (s, 1H, H3), 7.91-7.89 (m, 2H, H4, H7), 7.50-7.41 (m, 2H, H5, H6), 7.20-7.18 (d, 2H, J=8.0 Hz, H2', H6'), 6.84-6.80 (m, 2H, H3', H5'), 4.55-4.51 (t, 2H, J = 7.0 Hz, OCH<sub>2</sub>CH<sub>2</sub>), 3.06-3.03 (t, 2H, CH<sub>2</sub>CH<sub>2</sub>C). <sup>13</sup>C-NMR (101 MHz, CDCl<sub>3</sub>, 25°C); δ (ppm): 162.81 (C=O), 154.45 (C4'), 142.26 (C7a), 138.70 (C3a), 133.55 (C2), 133.55 (C1'), 130.59 (C2', C6'), 130.20 (C6), 129.69 (C5), 126.96 (C4), 125.57 (C7), 124.91 (C3), 115.46 (C3', C5'), 66.28 (CH<sub>2</sub>CH<sub>2</sub>C), 34.34 (CH<sub>2</sub>CH<sub>2</sub>C). HRMS *m/z* calc. for C<sub>17</sub>H<sub>14</sub>O<sub>3</sub>S + (NH<sub>4</sub><sup>+</sup>): 316.4; found: 316.1006.

#### **(E)-1-(1-Benzothiophen-2-yl)-3-(*m*-methoxyphenyl)-2-propen-1-one (12)**

Following our general procedure for the aldol condensation in the presence of sodium ethoxide with 2-acetylbenzothiophene (**10**) (250 mg, 1.42 mmol, 1 eq), sodium ethoxide (97 mg, 1.42 mg, 1 eq) and 3-methoxybenzaldehyde (232 mg, 1.70 mmol, 1.2 eq) compound **12** was obtained as a yellow solid after flash chromatography (8% EtOAc), yield = 17%, R<sub>f</sub> = 0.27 (10% EtOAc), m.p. = 124-125°C. <sup>1</sup>H-NMR (400 MHz, CDCl<sub>3</sub>, 25°C); δ (ppm): 8.13 (s, 1H, H3), 7.96-7.92 (m, 2H, H4, H7), 7.91-7.87 (d, 1H, J=16 Hz, CH=CHC), 7.57-7.53 (d, 1H, J=16 Hz, COCH=CH), 7.51-7.28 (m, 4H, H5, H6, H2', H6'), 7.21 (s, 1H, H5'), 7.03-7.00 (m, 1H, H4'), 3.90 (s, 3H, OCH<sub>3</sub>). <sup>13</sup>C-NMR (101 MHz, CDCl<sub>3</sub>, 25°C); δ (ppm): 183.42 (C=O), 160.00 (C3'), 145.17 (C7a), 144.34 (C2), 142.73 (COCH=CH), 139.28 (C3a), 136.04 (C1'), 130.02 (C5'), 128.92 (C6), 127.46 (C5), 126.00 (C4), 125.06 (C7), 123.03 (COCH=CH), 121.43 (C3), 121.22 (C6'), 116.49 (C4'), 113.65 (C2'), 55.41 (OCH<sub>3</sub>). HRMS *m/z* calc. for C<sub>18</sub>H<sub>14</sub>O<sub>2</sub>S + (H<sup>+</sup>): 295.0787; found: 295.078.

#### **(E)-1-(1-Benzothiophen-2-yl)-3-(*m*-hydroxyphenyl)-2-propen-1-one (15)**

Following our base-catalyzed aldol condensation general procedure with 2-acetylbenzothiophene (**10**) (250 mg, 1.42 mmol, 1.2 eq) and 3-hydroxybenzaldehyde (145 mg, 1.18 mmol, 1 eq) under reflux for 20 h, compound **15** was obtained as a yellow solid after flash chromatography (18% EtOAc/Hex), yield = 18 %, R<sub>f</sub> = 0.60 (30% EtOAc/Hex), m.p. =197-199°C. <sup>1</sup>H-NMR (400 MHz, DMSO-d<sub>6</sub>, 25°C); δ (ppm): 9.67 (s, 1H, OH - D<sub>2</sub>O exchange), 8.78 (s, 1H, H3), 8.10-8.04 (m, 2H, H4, H7), 7.98-7.94 (d, 1H, J=16 Hz, CH=CHC), 7.72-7.68 (d, 1H, J=16 Hz, COCH=CH), 7.58-7.49 (m, 2H, H2', H5'), 7.37-7.27 (m, 3H, H5, H6, H6'), 6.93-6.90 (m, 1H, H4'). <sup>13</sup>C-NMR (101 MHz, DMSO-d<sub>6</sub>, 25°C); δ (ppm): 183.62 (C=O), 158.25 (C3'), 145.48 (C7a), 144.25 (C2), 142.32 (COCH=CH), 139.86 (C3a), 136.24 (C1'), 131.58 (C5'), 130.38 (C6), 128.28 (C5), 126.86 (C4), 125.79 (C7), 123.65 (COCH=CH), 121.79 (C3), 120.51 (C6'), 118.51 (C4'), 115.89 (C2'). HRMS *m/z* calc. for C<sub>17</sub>H<sub>12</sub>O<sub>2</sub>S + (H<sup>+</sup>): 281.0631; found: 281.062.

#### **(E)-1-(1-Benzothiophen-2-yl)-3-(*p*-hydroxyphenyl)-2-propen-1-one (16)**

Following our base-catalyzed aldol condensation general procedure with 2-Acetylbenzothiophene (**10**) (250 mg, 1.42 mmol, 1.2 eq) and 4-hydroxybenzaldehyde (144 mg, 1.18 mmol, 1 eq) under reflux for 6h, compound **16** was obtained as a yellow solid after flash chromatography (40% EtOAc/Hex), yield = 28%, R<sub>f</sub> = 0,18 (50% EtOAc/Hex),

m.p. = 179-180°C. <sup>1</sup>H-NMR (400 MHz, CDCl<sub>3</sub>, 25°C); δ (ppm) : 8.13 (s, 1H, H<sub>3</sub>), 7.96-7.92 (m, 2H, H<sub>4</sub>, H<sub>7</sub>), 7.91-7.87 (d, 1H, J=16 Hz, CH=CHC), 7.64-7.62 (d, 2H, J=8.6 Hz, H<sub>5</sub>, H<sub>6</sub>), 7.52-7.45 (m, 2H, H<sub>2</sub>', H<sub>6</sub>'), 7.47-7.43 (d, 1H, J=16 Hz, COCH=CH), 6.94-6.92 (d, 2H, J=8.6 Hz, H<sub>3</sub>', H<sub>5</sub>'), 5.39 (s, 1H, OH). <sup>13</sup>C-NMR (101 MHz, CDCl<sub>3</sub>, 25°C); δ (ppm): 183.58 (C=O), 158.07 (C<sub>4</sub>'), 145.39 (C<sub>7a</sub>), 144.21 (C<sub>2</sub>), 142.63 (COCH=CH), 139.32 (C<sub>3a</sub>), 130.65 (C<sub>1</sub>'), 128.65 (C<sub>2</sub>', C<sub>6</sub>'), 127.64 (C<sub>6</sub>), 127.31 (C<sub>5</sub>), 125.90 (C<sub>4</sub>, C<sub>7</sub>), 123.01 (COCH=CH), 118.90 (C<sub>3</sub>), 116.05 (C<sub>3</sub>', C<sub>5</sub>'). HRMS *m/z* calc. for C<sub>17</sub>H<sub>12</sub>O<sub>2</sub>S + (H<sup>+</sup>): 281.0631; found: 281.0628.

**(E)-1-(1-Benzothiophen-2-yl)-3-(3-hydroxy-4-methoxyphenyl)-2-propen-1-one (17)**

Following our base-catalyzed aldol condensation general procedure with 2-acetylbenzothiophene (**10**) (250 mg, 1.42 mmol, 1.2 eq) and 3-hydroxy-4-methoxybenzaldehyde (180 mg, 1.18 mmol, 1 eq) under reflux for 10h, compound **17** was obtained as a yellow solid after flash chromatography (28% EtOAc/Hex), yield = 47%, R<sub>f</sub> = 0.50 (40% EtOAc/Hex), m.p. = 158-159°C. <sup>1</sup>H-NMR (400 MHz, CDCl<sub>3</sub>, 25°C); δ (ppm): 8.11 (s, 1H, H<sub>3</sub>), 7.96-7.91 (m, 2H, H<sub>4</sub>, H<sub>7</sub>), 7.86-7.82 (d, 1H, J = 15 Hz, CH=CHC), 7.51-7.42 (m, 2H, H<sub>ar</sub>), 7.45-7.41 (d, 1H, J=15 Hz, COCH=CH), 7.36-7.35 (d, 1H, J = 2.0 Hz H<sub>6</sub>'), 7.29 (s, 1H, H<sub>5</sub>), 7.21-7.18 (m, 1H, H<sub>6</sub>), 6.93-6.90 (d, 1H, J = 8.0 Hz, H<sub>2</sub>'), 5.73 (s, 1H, OH), 3.98 (s, 3H, OCH<sub>3</sub>). <sup>13</sup>C-NMR (101 MHz, CDCl<sub>3</sub>, 25°C); δ (ppm): 183.39 (C=O), 149.03 (C<sub>7a</sub>), 145.98 (C<sub>2</sub>), 145.45 (C<sub>3</sub>'), 144.33 (C<sub>4</sub>'), 142.62 (COCH=CH), 139.34 (C<sub>3a</sub>), 128.56 (C<sub>1</sub>'), 128.34 (C<sub>6</sub>), 127.29 (C<sub>5</sub>), 125.93 (C<sub>4</sub>), 124.98 (C<sub>7</sub>), 123.11 (COCH=CH), 122.99 (C<sub>3</sub>), 119.34 (C<sub>2</sub>'), 112.97 (C<sub>3</sub>'), 110.61 (C<sub>6</sub>'), 56.07 (OCH<sub>3</sub>). HRMS *m/z* calc. for C<sub>18</sub>H<sub>14</sub>O<sub>3</sub>S + (H<sup>+</sup>): 311.0736; found: 311.0729.

**(E)-1-(1-Benzothiophen-2-yl)-3-(4-hydroxy-3-methoxyphenyl)-2-propen-1-one (18)**

Following our base-catalyzed aldol condensation general procedure with 2-acetylbenzothiophene (**10**) (250 mg, 1.42 mmol, 1.2 eq) and 4-hydroxy-3-methoxybenzaldehyde (180 mg, 1.18 mmol, 1 eq) under reflux for 9h, compound **18** was obtained as a yellow solid after flash chromatography (30% EtOAc/Hex), yield = 29%, R<sub>f</sub> = 0,29 (40% EtOAc/Hex), m.p. = 113-114°C. <sup>1</sup>H-NMR (400 MHz, CDCl<sub>3</sub>, 25°C); δ (ppm): 8.13 (s, 1H, H<sub>3</sub>), 7.96-7.91 (t, 2H, J=8.0 Hz H<sub>4</sub>, H<sub>7</sub>), 7.88-7.85 (d, 1H, J=15 Hz, CH=CHC), 7.52-7.42 (m, 2H, H<sub>5</sub>, H<sub>6</sub>), 7.43-7.40 (d, 1H, J=15 Hz, COCH=CH), 7.31-7.30 (d, 1H, J=2.0 Hz H<sub>6</sub>'), 7.18 (d, 1H, J=2.0 Hz, H<sub>2</sub>'), 7.01-6.99 (d, 1H, J=8.0 Hz, H<sub>5</sub>'), 6.0 (s, 1H, OH), 4.02 (s, 3H, OCH<sub>3</sub>). <sup>13</sup>C-NMR (101 MHz, CDCl<sub>3</sub>, 25°C); δ (ppm): 183.39 (C=O), 148.52 (C<sub>7a</sub>), 146.84 (C<sub>3</sub>'), 145.44 (C<sub>2</sub>), 144.76 (C<sub>4</sub>'), 142.60 (COCH=CH), 139.32 (C<sub>3a</sub>), 128.45 (C<sub>1</sub>'), 127.28 (C<sub>6</sub>), 125.87 (C<sub>5</sub>), 125.00 (C<sub>4</sub>), 123.50 (C<sub>7</sub>), 123.01 (COCH=CH), 118.76 (C<sub>3</sub>, C<sub>6</sub>'), 114.95 (C<sub>5</sub>'), 110.29 (C<sub>6</sub>'). HRMS *m/z* calc. for C<sub>18</sub>H<sub>14</sub>O<sub>3</sub>S + (H<sup>+</sup>): 311.0736; found: 311.0736.

**(E)-1-(1-Benzothiophen-2-yl)-3-(3,4-dimethoxyphenyl)-2-propen-1-one (19)**

Following our base-catalyzed aldol condensation general procedure with 2-acetylbenzothiophene (**10**) (500 mg, 2.84 mmol, 1.2 eq) and 3,4-dimethoxybenzaldehyde (394 mg, 2.37 mmol, 1 eq) under reflux for 22.5 h, compound **19** was obtained as a yellow solid after flash chromatography (18% EtOAc/Hex), yield = 23 %, R<sub>f</sub> = 0.24 (20% EtOAc/Hex), m.p. =127-128°C. <sup>1</sup>H-NMR (400 MHz, CDCl<sub>3</sub>, 25°C); δ (ppm): 8.13 (s, 1H, H<sub>3</sub>), 7.96-7.91 (m, 2H, H<sub>4</sub>,

H7), 7.89-7.86 (d, 1H, J=15 Hz, CH=CHC), 7.52-7.42 (m, 2H, H5, H6), 7.45-7.41 (d, 1H, J=15 Hz, COCH=CH), 7.32-7.28 (m, 1H, H6'), 7.22-7.21 (d, 1H, J=2 Hz, H2'), 6.95-6.93 (d, 1H, J=8 Hz, H5'), 4.00 (s, 3H, OCH<sub>3</sub>), 3.97 (s, 3H, OCH<sub>3</sub>). <sup>13</sup>C-NMR (101 MHz, CDCl<sub>3</sub>, 25°C); δ (ppm): 183.38 (C=O), 151.68 (C7a), 149.32 (C3'), 145.43 (C4'), 144.60 (C2), 142.61 (COCH=CH), 139.32 (C3a), 138.48 (C1'), 127.65 (C6), 127.30 (C5), 125.88 (C4), 125.00 (C7), 123.41 (COCH=CH), 123.01 (C3), 119.00 (C2'), 111.18 (C3'), 110.28 (C6'), 56.04 (OCH<sub>3</sub>). HRMS *m/z* calc. for C<sub>19</sub>H<sub>16</sub>O<sub>3</sub>S + (H<sup>+</sup>): 325.0893; found: 325.0883.

**(E)-1-(1-Benzothiophen-2-yl)-3-(3,5-dimethoxyphenyl)-2-propen-1-one (20)**

Following our base-catalyzed aldol condensation general procedure with 2-acetylbenzothiophene (**10**) (250 mg, 1.42 mmol, 1.2 eq) and 3,5-dimethoxybenzaldehyde (197 mg, 1.18 mmol, 1 eq) under reflux for 8 h, compound **20** was obtained as a yellow solid after flash chromatography (12% EtOAc/Hex), yield = 15 %, R<sub>f</sub> = 0,62 (20% EtOAc/Hex), m.p. =113-114°C. <sup>1</sup>H-NMR (400 MHz, CDCl<sub>3</sub>, 25°C); δ (ppm): 8.13 (s, 1H, H3), 7.96-7.93 (t, 2H, J=8 Hz, H4, H7), 7.91-7.85 (d, 1H, J=16 Hz, CH=CHC), 7.53-7.49 (d, 1H, J=16 Hz, COCH=CH), 7.53-7.91-7.43 (m, 2H, H5, H6), 6.84-6.83 (d, 2H, J = 2 Hz, H2', H6'), 6.58-6.57 (t, 1H, J=2 Hz, H4'), 3.88 (s, 6H, OCH<sub>3</sub>). <sup>13</sup>C-NMR (101 MHz, CDCl<sub>3</sub>, 25°C); δ (ppm): 183.40 (C=O), 161.12 (C3', C5'), 145.13 (C7a), 144.43 (C2), 142.73 (COCH=CH), 139.27 (C3a), 136.54 (C1'), 128.94 (C6), 127.47 (C5), 126.00 (C4), 125.06 (C7), 123.02 (COCH=CH), 121.62 (C3), 106.51 (C2', C6'), 102.94 (C4'), 55.53 (OCH<sub>3</sub>). HRMS *m/z* calc. for C<sub>19</sub>H<sub>16</sub>O<sub>3</sub>S + (H<sup>+</sup>): 325.0893; found: 325.0885.

**(E)-1-(1-Benzothiophen-2-yl)-3-(2,3-dimethoxyphenyl)-2-propen-1-one (21)**

Following our base-catalyzed aldol condensation general procedure with 2-acetylbenzothiophene (**10**) (250 mg, 1.42 mmol, 1.2 eq) and 2,3-dimethoxybenzaldehyde (197 mg, 1.18 mmol, 1 eq) under reflux for 14.5 h, compound **21** was obtained as a yellow solid after flash chromatography (10 % EtOAc/Hex), yield = 14 %, R<sub>f</sub> = 0.19 (10 % EtOAc/Hex), m.p. =86-87°C. <sup>1</sup>H-NMR (400 MHz, CDCl<sub>3</sub>, 25°C); δ (ppm): 8.22-8.18 (d, 1H, J = 16 Hz, CH=CHC), 8.11 (s, 1H, H3), 7.95-7.90 (t, 2H, J = 9 Hz, H4, H7), 7.67-7.63 (d, 1H, J = 16 Hz, COCH=CH), 7.51-7.42 (m, 2H, H5, H6), 7.34-7.32 (d, 1H, J = 8 Hz, H6'), 7.16-7.12 (t, 1H, J = 8 Hz, H5'), 7.02-7.00 (d, 1H, J = 8 Hz, H4'), 3.94 (s, 3H, OCH<sub>3</sub>), 3.92 (s, 3H, OCH<sub>3</sub>). <sup>13</sup>C-NMR (101 MHz, CDCl<sub>3</sub>, 25°C); δ (ppm): 183.79 (C=O), 153.28 (C7a), 149.16 (C3'), 145.34 (C2'), 142.68 (C2), 139.35 (COCH=CH), 139.31 (C3a), 128.87 (C6), 128.84 (C5), 127.37 (C4), 125.98 (C7), 125.01 (COCH=CH), 124.25 (C3), 122.72 (C5'), 119.82 (C6'), 114.44 (C4'), 61.39 (OCH<sub>3</sub>), 55.94 (OCH<sub>3</sub>). HRMS *m/z* calc. for C<sub>19</sub>H<sub>16</sub>O<sub>3</sub>S + (H<sup>+</sup>): 325.0893; found: 325.0886.

**(E)-1-(1-Benzothiophen-2-yl)-3-(2,4-dimethoxyphenyl)-2-propen-1-one (22)**

Following our base-catalyzed aldol condensation general procedure with 2-acetylbenzothiophene (**10**) (250 mg, 1.42 mmol, 1.2 eq) and 2,4-dimethoxybenzaldehyde (197 mg, 1.18 mmol, 1 eq) under reflux for 14.5 h, compound **22** was obtained as a yellow solid after flash chromatography (15 % EtOAc/Hex), yield = 45 %, R<sub>f</sub> = 0.45 (20% EtOAc/Hex), m.p. = 98-100°C.): 8.17-8.13 (d, 1H, J = 16 Hz, CH=CHC), 8.08 (s, 1H, H3), 7.94-7.90 (t, 2H, J = 8 Hz, H4, H7), 7.63-7.60 (m, 1H, H5), 7.61-7.57 (d, 1H, J = 16 Hz, CH=CHC), 7.49-

7.41 (m, 1H, H6'), 6.59-6.56 (m, 1H, H5'), 6.51-6.50 (d, 1H, J = 2 Hz, H3'), 3.95 (s, 3H, OCH<sub>3</sub>), 3.86 (s, 3H, OCH<sub>3</sub>). <sup>13</sup>C-NMR (101 MHz, CDCl<sub>3</sub>, 25°C); δ (ppm): 184.02 (C=O), 163.27 (C4'), 160.65 (C7a), 145.87 (C2'), 142.50 (C2), 140.20 (COCH=CH), 139.41 (C3a), 131.32 (C6'), 128.14 (C6), 127.05 (C5), 125.81 (C4), 124.86 (C7), 122.96 (COCH=CH), 119.47 (C3), 116.94 (C1'), 105.53 (C5'), 98.48 (C3'), 55.61 (OCH<sub>3</sub>), 55.53 (OCH<sub>3</sub>). LC-MS *m/z* calc. for C<sub>19</sub>H<sub>16</sub>O<sub>3</sub>S + (H<sup>+</sup>): 325.0893; found: 325.089.

**(E)-1-(1-Benzothiophen-2-yl)-3-(2,5-dimethoxyphenyl)-2-propen-1-one (23)**

Following our base-catalyzed aldol condensation general procedure with 2-acetylbenzothiophene (250 mg, 1.42 mmol, 1.2 eq) and 2,5-dimethoxybenzaldehyde (197 mg, 1.18 mmol, 1 eq) under reflux for 13 h, compound **23** was obtained as a brown solid after flash chromatography (7-10 % EtOAc/Hex), quantitative yield, R<sub>f</sub> = 0.22 (10% EtOAc/Hex), m.p. = 95-97 °C. <sup>1</sup>H-NMR (400 MHz, CDCl<sub>3</sub>, 25°C); δ (ppm): 8.17-8.13 (d, 1H, J=16 Hz, CH=CHC), 8.08 (s, 1H, H3), 7.94-7.90 (t, 2H, J = 8 Hz, H4, H7), 7.63-7.60 (m, 1H, H6'), 7.61-7.57 (d, 1H, J = 16 Hz, COCH=CH), 7.49-7.41 (m, 2H, H5, H6), 6.59-6.56 (m, 1H, H3'), 6.51-6.50 (d, 1H, J = 2 Hz, H4'), 3.95 (s, 3H, OCH<sub>3</sub>), 3.86 (s, 3H, OCH<sub>3</sub>). <sup>13</sup>C-NMR (101 MHz, CDCl<sub>3</sub>, 25°C); δ (ppm): 183.94 (C=O), 153.56 (C5'), 153.55 (C2'), 145.46 (C7a), 142.64 (C2), 139.85 (COCH=CH), 139.33 (C3a), 128.67 (C6), 127.27 (C5), 125.93 (C4), 124.96 (C7), 124.29 (COCH=CH), 122.99 (C3), 122.22 (C3'), 117.45 (C1'), 114.09 (C4'), 112.52 (C6'), 56.16 (OCH<sub>3</sub>), 55.90 (OCH<sub>3</sub>). LC-MS *m/z* calc. for C<sub>19</sub>H<sub>16</sub>O<sub>3</sub>S + (H<sup>+</sup>): 325.0893; found: 325.0883.

**(E)-1-(1-Benzothiophen-2-yl)-3-(2,6-dimethoxyphenyl)-2-propen-1-one (24)**

Following our base-catalyzed aldol condensation general procedure with 2-acetylbenzothiophene (**10**) (250 mg, 1.42 mmol, 1.2 eq) and 2,6-dimethoxybenzaldehyde (196 mg, 1.18 mmol, 1 eq), under reflux for 7.5h, compound **24** was obtained as a yellow solid after flash chromatography (18% EtOAc/Hex), yield = 36%, R<sub>f</sub> = 0,25 (20% EtOAc/Hex), m.p. = 175-176 °C. <sup>1</sup>H-NMR (400 MHz, CDCl<sub>3</sub>, 25°C); δ (ppm): 8.40-8.36 (d, 1H, J=16 Hz, CH=CHC), 8.07-8.01 (d, 1H, J = 16 Hz, COCH=CH), 8.05 (s, 1H, H3), 7.95-7.91 (t, 2H, J = 9 Hz, H4, H7), 7.50-7.41 (m, 2H, H5, H6), 7.36-7.32 (t, 1H, J=8 Hz, H4'), 6.38-6.62 (d, 2H, J = 8 Hz, H3', H5'), 3.98 (s, 6H, OCH<sub>3</sub>). <sup>13</sup>C-NMR (101 MHz, CDCl<sub>3</sub>, 25°C); δ (ppm): 185.11 (C=O), 160.57 (C7a), 146.05 (C2', C6'), 142.53 (C2), 139.43 (COCH=CH), 135.48 (C3a), 131.79 (C4'), 128.20 (C6), 126.98 (C5), 125.80 (C4), 124.80 (C7), 124.01 (COCH=CH), 122.97 (C3), 112.78 (C1'), 103.79 (C3', C5'), 55.94 (OCH<sub>3</sub>). HRMS *m/z* calc. for C<sub>19</sub>H<sub>16</sub>O<sub>3</sub>S + (H<sup>+</sup>): 325.0893; found: 325.0885.

**(E)-1-(1-Benzothiophen-2-yl)-3-(3,4,5-trimethoxyphenyl)-2-propen-1-one (26)**

Following our base-catalyzed aldol condensation general procedure with 2-acetylbenzothiophene (**10**) (250 mg, 1.42 mmol, 1.2 eq) and 3,4,5-trimethoxybenzaldehyde (232 mg, 1.18 mmol, 1 eq) under reflux for 14 h, compound **26** was obtained as a yellow solid after flash chromatography (18% EtOAc/Hex), yield = 12 %, R<sub>f</sub> = 0,20 (20% EtOAc/Hex), m.p. =125-127°C. <sup>1</sup>H-NMR (400 MHz, CDCl<sub>3</sub>, 25°C); δ (ppm): 8.14 (s, 1H, H3), 7.97-7.92 (t, 2H, J = 9 Hz, H4, H7), 7.86-7.82 (d, 1H, J = 16 Hz, CH=CHC), 7.53-7.43 (m, 2H, H5, H6) 7.46-7.42 (d, 1H, J = 16 Hz, COCH=CH), 6.93 (s, 2H, H2', H6'), 3.97 (s, 6H, O-CH<sub>3</sub>), 3.94 (s, 3H, O-CH<sub>3</sub>). <sup>13</sup>C-NMR (101 MHz, CDCl<sub>3</sub>, 25°C); δ

(ppm): 183.30 (C=O), 153.54 (C7a), 145.22 (C3'), 144.61 (C5'), 142.68 (COCH=CH), 140.72 (C3a), 139.28 (C4'), 130.12 (C1'), 128.73 (C6), 127.42 (C5), 125.93 (C4), 125.06 (C7), 123.03 (COCH=CH), 120.37 (C3), 105.88 (C2', C6'), 61.04 (OCH<sub>3</sub>), 56.30 (OCH<sub>3</sub>). HRMS *m/z* calc. for C<sub>20</sub>H<sub>18</sub>O<sub>4</sub>S + (H<sup>+</sup>): 355.0999; found: 355.0989.

**(E)-1-(1-Benzothiophen-2-yl)-3-(2,4,6-trimethoxyphenyl)-2-propen-1-one (27)**

Following our base-catalyzed aldol condensation general procedure with 2-acetylbenzothiophene (**10**) (250 mg, 1.42 mmol, 1.2 eq) and 2,4,6-trimethoxybenzaldehyde (232 mg, 1.18 mmol, 1 eq) under reflux for 7 h, compound **27** was obtained as a yellow solid after flash chromatography (25% EtOAc/Hex), yield = 36 %, R<sub>f</sub> = 0.41 (30% EtOAc/Hex), m.p. =145-147°C. <sup>1</sup>H-NMR (400 MHz, CDCl<sub>3</sub>, 25°C); δ (ppm): 8.38-8.34 (d, 1H, J=16 Hz, CH=CHC), 8.04 (s, 1H, H3), 7.94-7.87 (d, 1H, J=16 Hz, COCH=CH), 7.92 (s, 2H, H4, H7), 7.48-7.40 (m, 2H, H5, H6), 6.17 (s, 2H, H3', H5'), 3.96 (s, 6H, OCH<sub>3</sub>), 3.89 (s, 3H, OCH<sub>3</sub>). <sup>13</sup>C-NMR (101 MHz, CDCl<sub>3</sub>, 25°C); δ (ppm): 185.04 (C=O), 163.40 (C4'), 161.94 (C2', C6'), 146.40 (C7a), 142.40 (C2), 139.49 (COCH=CH), 135.72 (C3a), 127.71 (C6), 126.79 (C5), 125.69 (C4), 124.72 (C7), 122.93 (COCH=CH), 121.04 (C3), 106.47 (C1'), 90.57 (C3', C5'), 55.88 (OCH<sub>3</sub>), 55.44 (OCH<sub>3</sub>). HRMS *m/z* calc. for C<sub>20</sub>H<sub>18</sub>O<sub>4</sub>S + (H<sup>+</sup>): 355.0999; found: 355.099.

**(E)-1-(1-Benzothiophen-2-yl)-3-(4-hydroxy-3,5-dimethoxyphenyl)-2-propen-1-one (28)**

Following our base-catalyzed aldol condensation general procedure with 2-acetylbenzothiophene (**10**) (250 mg, 1.42 mmol, 1.2 eq) and 4-hydroxy-3,5-methoxybenzaldehyde (215 mg, 1.18 mmol, 1 eq) under reflux for 10h, compound **28** was obtained as a yellow solid after flash chromatography (30% EtOAc/Hex), yield = 11%, R<sub>f</sub> = 0.26 (50% EtOAc/Hex), m.p. = 69-70°C. <sup>1</sup>H-NMR (400 MHz, CDCl<sub>3</sub>, 25°C); δ (ppm): 8.13 (s, 1H, H3), 7.96-7.91 (m, 2H, H4, H7), 7.85-7.81 (d, 1H, J = 15 Hz, CH=CHC), 7.51-7.28 (m, 2H, H5, H6), 7.42-7.38 (d, 1H, J=15 Hz, COCH=CH), 6.94 (s, 2H, H2', H6'), 5.9 (s, 1H, OH), 4.00 (s, 6H, OCH<sub>3</sub>). <sup>13</sup>C-NMR (101 MHz, CDCl<sub>3</sub>, 25°C); δ (ppm): 183.26, (CO) 147.32 (C3', C5'), 145.39 (C7a), 145.00 (C2), 142.61 (COCH=CH), 139.31 (C3a), 137.79 (C4'), 128.51 (C1'), 127.31 (C6), 126.18 (C5), 125.87 (C4), 125.01 (C7), 123.00 (COCH=CH), 118.99 (C3), 105.74 (C2', C6'), 56.46 (OCH<sub>3</sub>). HRMS *m/z* calc. for C<sub>19</sub>H<sub>16</sub>O<sub>4</sub>S + (H<sup>+</sup>): 341.0842; found: 341.0842.

**(E)-1-(1-Benzothiophen-2-yl)-3-(4-hydroxy-3,5-dimethylphenyl)-2-propen-1-one (29)**

Following our base-catalyzed aldol condensation general procedure with 2-acetylbenzothiophene (**10**) (250 mg, 1.42 mmol, 1.2 eq) and 4-hydroxy-3,5-dimethylbenzaldehyde (178 mg, 1.18 mmol, 1 eq) under reflux for 7.5h, compound **29** was obtained as a yellow solid after flash chromatography (18% EtOAc/Hex), yield = 16%, R<sub>f</sub> = 0,51 (30% EtOAc/Hex), m.p. = 178-179°C. <sup>1</sup>H-NMR (400 MHz, CDCl<sub>3</sub>, 25°C); δ (ppm): 8.12 (s, 1H, H3), 7.95-7.82 (t, 2H, J = 9 Hz, H4, H7), 7.85-7.82 (d, 1H, J = 15 Hz, CH=CHC), 7.51-7.28 (m, 4H, H5, H6, H2', H6'), 7.45-7.41 (d, 1H, J = 15 Hz, COCH=CH), 5.15 (s, 1H, OH), 2.33 (s, 6H, OCH<sub>3</sub>). <sup>13</sup>C-NMR (101 MHz, CDCl<sub>3</sub>, 25°C); δ (ppm): 183.52 (C=O), 155.07 (C4'), 145.60 (C7a), 144.83 (C2), 142.59 (COCH=CH), 139.37 (C3a), 129.57 (C2', C6'), 128.40 (C1'), 127.22 (C6), 126.87 (C5), 125.86 (C4), 124.96 (C7), 123.73 (COCH=CH), 122.99 (C3), 118.35 (C3', C5'), 15.91 (CH<sub>3</sub>). HRMS *m/z* calc. for C<sub>19</sub>H<sub>16</sub>O<sub>2</sub>S + (H<sup>+</sup>): 309.0944; found: 309.0933.

### **(E)-1-(1-Benzothiophen-2-yl)-3-(4-hydroxy-2,6-dimethoxyphenyl)-2-propen-1-one (30)**

Following our base-catalyzed aldol condensation general procedure with 2-acetylbenzothiophene (**10**) (250 mg, 1.42 mmol, 1.2 eq) and 4-hydroxy-2,6-dimethoxybenzaldehyde (215 mg, 1.18 mmol, 1 eq), under reflux for 15 hr, compound **30** was obtained as a yellow solid after flash chromatography (40% EtOAc/Hex), yield = 66%, Rf = 0,38 (60% EtOAc/Hex), m.p. = 195-197 °C. <sup>1</sup>H-NMR (400 MHz, DMSO-d<sub>6</sub> 25°C); δ (ppm): 10.40 (s, 1H, OH), 8.35 (s, 1H, H<sub>3</sub>), 8.17-8.13 (d, 1H, J = 15 Hz, CH=CHC), 8.09-8.05 (t, 2H, J = 8 Hz, H<sub>4</sub>, H<sub>7</sub>), 7.89-7.85 (d, 1H, J = 15 Hz, COCH=CH), 7.53-7.48 (m, 2H, H<sub>5</sub>, H<sub>6</sub>), 6.19 (s, 2H, H<sub>3'</sub>, H<sub>5'</sub>), 3.32 (s, 6H, OCH<sub>3</sub>). <sup>13</sup>C-NMR (101 MHz, DMSO-d<sub>6</sub>, 25°C); δ (ppm): 184.14 (C=O), 163.07 (C<sub>2'</sub>, C<sub>6'</sub>, C<sub>4'</sub>), 162.38 (C<sub>7a</sub>), 146.34 (C<sub>2</sub>), 141.89 (COCH=CH), 139.97 (C<sub>3a</sub>), 135.75 (C<sub>6</sub>), 129.07 (C<sub>5</sub>), 127.77 (C<sub>4</sub>), 126.71 (C<sub>7</sub>), 125.56 (COCH=CH), 118.84 (C<sub>3</sub>), 104.19 (C<sub>1'</sub>), 92.71 (C<sub>3'</sub>, C<sub>5'</sub>), 56.38 (OCH<sub>3</sub>). HRMS *m/z* calc. for C<sub>19</sub>H<sub>16</sub>O<sub>4</sub>S + (H<sup>+</sup>): 341.0842; found: 341.0836.

### **(E)-1-(1-Benzothiophen-2-yl)-3-(3-hydroxy-4,5-dimethoxyphenyl)-2-propen-1-one (31)**

Following our base-catalyzed aldol condensation general procedure with 2-acetylbenzothiophene (**10**) (250 mg, 1.42 mmol, 1.2 eq) and 5-hydroxy-3,4-dimethoxybenzaldehyde (215 mg, 1.18 mmol, 1 eq) under reflux for 15 h, compound **31** was obtained as a yellow solid after flash chromatography (20 % EtOAc/Hex), yield = 41 %, Rf = 0.29 (30 % EtOAc/Hex), m.p. = 158-160°C. <sup>1</sup>H-NMR (400 MHz, DMSO, 25°C); δ (ppm): 9.37 (s, 1H, OH), 8.73 (s, 1H, H<sub>3</sub>), 8.10-8.8.05 (m, 2H, H<sub>4</sub>, H<sub>7</sub>), 7.90-7.86 (d, 1H, J = 16 Hz, CH=CHC), 7.67-7.63 (d, 1H, J = 16 Hz, COCH=CH), 7.58-7.49 (m, 2H, H<sub>5</sub>, H<sub>6</sub>), 7.14-7.13 (d, 1H, J = 2 Hz, H<sub>2'</sub>), 7.01-7.00 (d, 1H, J = 2 Hz, H<sub>6'</sub>), 3.89 (s, 3H, OCH<sub>3</sub>), 3.75 (s, 3H, OCH<sub>3</sub>). <sup>13</sup>C-NMR (101 MHz, DMSO, 25°C); δ (ppm): 183.50 (C=O), 153.88 (C<sub>7a</sub>), 151.15 (C<sub>5'</sub>), 145.70 (C<sub>3'</sub>), 144.51 (C<sub>2</sub>), 142.29 (COCH=CH), 139.84 (C<sub>3'</sub>), 139.46 (C<sub>3a</sub>), 131.20 (C<sub>1'</sub>), 130.36 (C<sub>6</sub>), 128.21 (C<sub>5</sub>), 126.77 (C<sub>4</sub>), 125.79 (C<sub>7</sub>), 123.65 (COCH=CH), 120.78 (C<sub>3</sub>), 111.52 (C<sub>2'</sub>), 104.60 (C<sub>6'</sub>), 60.58 (OCH<sub>3</sub>), 56.52 (OCH<sub>3</sub>). HRMS *m/z* calc. for C<sub>19</sub>H<sub>16</sub>O<sub>4</sub>S + (H<sup>+</sup>): 341.0842; found: 341.0835.

### **1-Hydroxy-1-((E)-3-(4-hydroxy-3-methoxyphenyl)acryloyl)urea (35)**

Following our general procedure for the peptide coupling of hydroxyl urea (**32**) (195 mg, 2.57 mmol, 1 eq) with 4-hydroxy-3-methoxycinnamic acid (500 mg, 2.57 mmol, 1 eq), TEA (537 μL, 3.85 mmol, 1.5 eq), and BOP (1136 mg, 2.57 mmol, 1 eq), compound **35** was obtained as a light yellow solid after flash chromatography (70% EtOAc/Hex), yield = 38 %, Rf = 0.24 (80 % EtOAc/Hex), m.p. = 150-152°C. <sup>1</sup>H-NMR (400 MHz, DMSO-d<sub>6</sub>, 25°C); δ (ppm): 9.69 (s, 1H, OH - D<sub>2</sub>O exchange), 9.58 (s, 1H, OH - D<sub>2</sub>O exchange), 7.69-7.65 (d, 1H, J = 16 Hz, CH=CHCO), 7.36-7.35 (d, 1H, J = 2 Hz, H<sub>2</sub>), 7.19-7.16 (m, 1H, H<sub>6</sub>), 6.83-6.81 (d, 1H, J = 8 Hz, H<sub>5</sub>), 6.58-6.54 (d, 1H, J = 16 Hz, CH=CHCO), 6.49 (s, 2H, NH<sub>2</sub> - D<sub>2</sub>O exchange), 3.83 (s, 3H, OCH<sub>3</sub>). <sup>13</sup>C-NMR (101 MHz, DMSO-d<sub>6</sub>, 25°C); δ (ppm): 166.64 (C=O), 159.97 (NCON), 150.19 (C<sub>3</sub>), 148.42 (C<sub>4</sub>), 146.89 (CCH=CH), 125.94 (C<sub>1</sub>), 123.92 (C<sub>6</sub>), 116.03 (CCH=CH), 111.99 (C<sub>5</sub>), 111.85 (C<sub>2</sub>), 56.18 (OCH<sub>3</sub>). HRMS *m/z* calc. for C<sub>11</sub>H<sub>12</sub>N<sub>2</sub>O<sub>5</sub> + (Na<sup>+</sup>): 275.0644; found: 275.0640.

### **1-Hydroxy-1-((E)-3-(3,4-dimethoxyphenyl)acryloyl)urea (36)**

Following our general procedure for the peptide coupling of hydroxyl urea (**32**) (183 mg, 2.4 mmol, 2 eq) with 3,4-



dimethoxycinnamic acid (250 mg, 1.2 mmol, 1 eq), TEA (334  $\mu$ L, 2.4 mmol, 2 eq), and BOP (530 mg, 1.2 mmol, 1 eq), compound **36** was obtained as a white solid after filtering through celite, quantitative yield,  $R_f = 0.49$  (50% EtOAc/Hex), m.p. = 195-197°C.  $^1\text{H-NMR}$  (400 MHz, DMSO- $d_6$ , 25°C);  $\delta$  (ppm) : 9.67 (s, 1H, OH -  $\text{D}_2\text{O}$  exchange), 7.72-7.68 (d, 1H,  $J = 16$  Hz,  $\text{CCH}=\underline{\text{CH}}$ ), 7.39-7.38 (d, 1H,  $J = 2$  Hz, H2), 7.31-7.29 (d, 1H,  $J = 8$  Hz, H6), 7.02-7.00 (d, 1H,  $J = 8$  Hz, H5), 6.67-6.63 (d, 1H,  $J = 16$  Hz,  $\text{CCH}=\underline{\text{CH}}$ ), 6.52 (s, 2H,  $\text{NH}_2$  -  $\text{D}_2\text{O}$  exchange), 3.82 (s, 3H,  $\text{OCH}_3$ ), 3.81 (s, 3H,  $\text{OCH}_3$ ).  $^{13}\text{C-NMR}$  (101 MHz, DMSO- $d_6$ , 25°C);  $\delta$  (ppm): 166.51 (C=O), 159.95 (NCON), 151.75 (C3), 149.45 (C4), 146.50 ( $\text{CCH}=\underline{\text{CH}}$ ), 127.20 (C1), 123.75 (C6), 113.15 ( $\text{CCH}=\underline{\text{CH}}$ ), 112.02 (C5), 110.94 (C2), 56.11 ( $\text{CH}_3$ ), 56.07 ( $\text{OCH}_3$ ). HRMS  $m/z$  calc. for  $\text{C}_{12}\text{H}_{14}\text{N}_2\text{O}_5 + (\text{Na}^+)$ : 289.0795; found: 289.0778.

### 1-Hydroxy-1-((E)-3-(4-hydroxy-3,5-dimethoxyphenyl)acryloyl)urea (37)

Following our general procedure for the peptide coupling of hydroxyl urea (**32**) (85 mg, 1.12 mmol, 1 eq) with 4-hydroxy-3,5-dimethoxycinnamic acid (250 mg, 1.12 mmol, 1 eq), TEA (234  $\mu$ L, 1.68 mmol, 1.5 eq), and BOP (495 mg, 1.12 mmol, 1 eq), compound **37** was obtained as a light yellow solid after flash chromatography (75% EtOAc/Hex), yield = 23 %,  $R_f = 0.15$  (80 % EtOAc/Hex), m.p. = 164-166°C.  $^1\text{H-NMR}$  (400 MHz, DMSO- $d_6$ , 25°C) ;  $\delta$  (ppm) : 9.59 (s, 1H, OH -  $\text{D}_2\text{O}$  exchange), 9.05 (s, 1H, OH -  $\text{D}_2\text{O}$  exchange), 7.69-7.65 (d, 1H,  $J = 16$  Hz,  $\text{CCH}=\underline{\text{CH}}$ ), 7.08 (s, 2H,  $\text{NH}_2$  -  $\text{D}_2\text{O}$  exchange), 6.64-6.60 (d, 1H,  $J = 16$  Hz,  $\text{CCH}=\underline{\text{CH}}$ ), 6.49 (s, 2H, H2, H6), 3.81 (s, 6H,  $\text{OCH}_3$ ).  $^{13}\text{C-NMR}$  (101 MHz, DMSO- $d_6$ , 25°C);  $\delta$  (ppm): 166.61 (C=O), 159.96 (NCON), 148.51 (C3, C5), 147.20 ( $\text{CCH}=\underline{\text{CH}}$ ), 139.17 (C4), 124.75 (C1), 112.44 ( $\text{CCH}=\underline{\text{CH}}$ ), 106.93 (C2, C6), 56.58 ( $\text{OCH}_3$ ). HRMS  $m/z$  calc. for  $\text{C}_{12}\text{H}_{14}\text{N}_2\text{O}_6 + (\text{Na}^+)$ :305.0732; found:305.0744.

### 1-(3-Phenylpropanoyl)-1-hydroxyurea (40)

Following our general procedure for hydroxyurea analogs synthesis with acyl chlorides, hydroxyurea (**32**) (245 mg, 3.23 mmol), DMAP (394 mg, 3.23 mmol), and hydrocinnamoyl chloride (500 mg, 3.23 mmol) compound **40** was obtained as a white solid after flash chromatography, yield = 65 %,  $R_f = 0.25$  (50 % EtOAc/Hex), m.p. = 79-81°C.  $^1\text{H-NMR}$  (400 MHz, DMSO- $d_6$ , 25°C);  $\delta$  (ppm): 9.55 (s, 1H, OH -  $\text{D}_2\text{O}$  exchange), 7.31-7.25 (m, 4H, H2, H3, H5, H6), 7.22-7.19 (m, 1H, H4), 6.49 (s, 2H,  $\text{NH}_2$  -  $\text{D}_2\text{O}$  exchange), 2.90-2.87 (t, 2H,  $J = 7$  Hz,  $\text{CCH}_2\underline{\text{CH}_2}$ ), 2.78-2.74 (t, 2H,  $J = 7$  Hz,  $\text{CCH}_2\underline{\text{CH}_2}$ ).  $^{13}\text{C-NMR}$  (101 MHz, DMSO- $d_6$ , 25°C);  $\delta$  (ppm): 172.09 (C=O), 159.95 (NCON), 140.70 (C1), 128.83 (C3, C5), 128.73 (C2, C6), 126.63 (C4), 33.25 ( $\text{CCH}_2\underline{\text{CH}_2}$ ), 30.28 ( $\text{CCH}_2\underline{\text{CH}_2}$ ). LC-MS  $m/z$  calc. for  $\text{C}_{10}\text{H}_{12}\text{N}_2\text{O}_3 + (\text{Na}^+)$ : 231.0740; found: 231.0745.

<sup>1</sup>H NMR

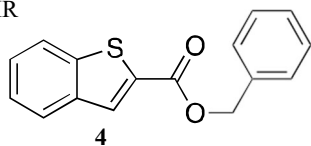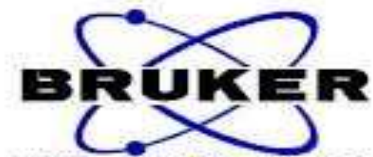

NAME Audrey Isabelle  
EXPNO 8  
PROCNO 1  
Date\_ 20190131  
Time\_ 11.15  
INSTRUM spect  
PROBHD 5 mm DSSBO BB-  
PULPROG zg30  
TD 65536  
SOLVENT CDCl3  
NS 16  
DS 2  
SWH 8223.685 Hz  
FIDRES 0.125483 Hz  
AQ 3.9846387 sec  
RG 101  
DW 60.800 usec  
DE 6.50 usec  
TE 298.0 K  
D1 1.00000000 sec  
TD0 1

----- CHANNEL F1 -----  
NUC1 1H  
P1 14.07 usec  
PL1 0.30 dB  
PL1W 11.25229836 W  
SFO1 400.1324710 MHz  
SI 32768  
SF 400.1300000 MHz  
WDW EM  
SSB 0  
LB 0.30 Hz  
GB 0  
DC 1.00

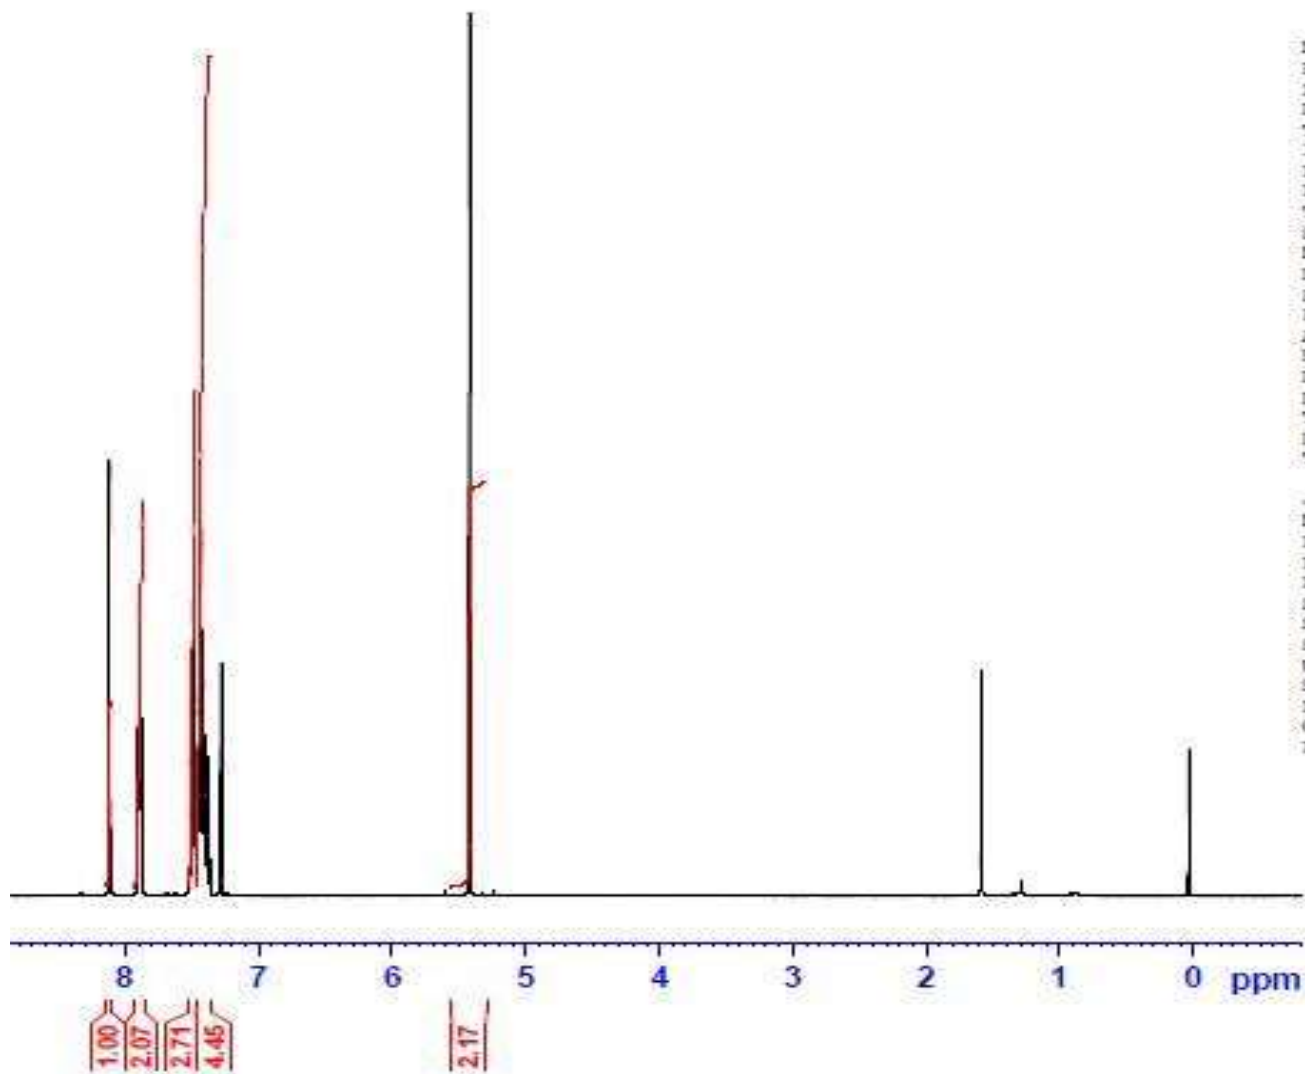

<sup>13</sup>C NMR

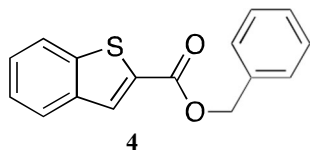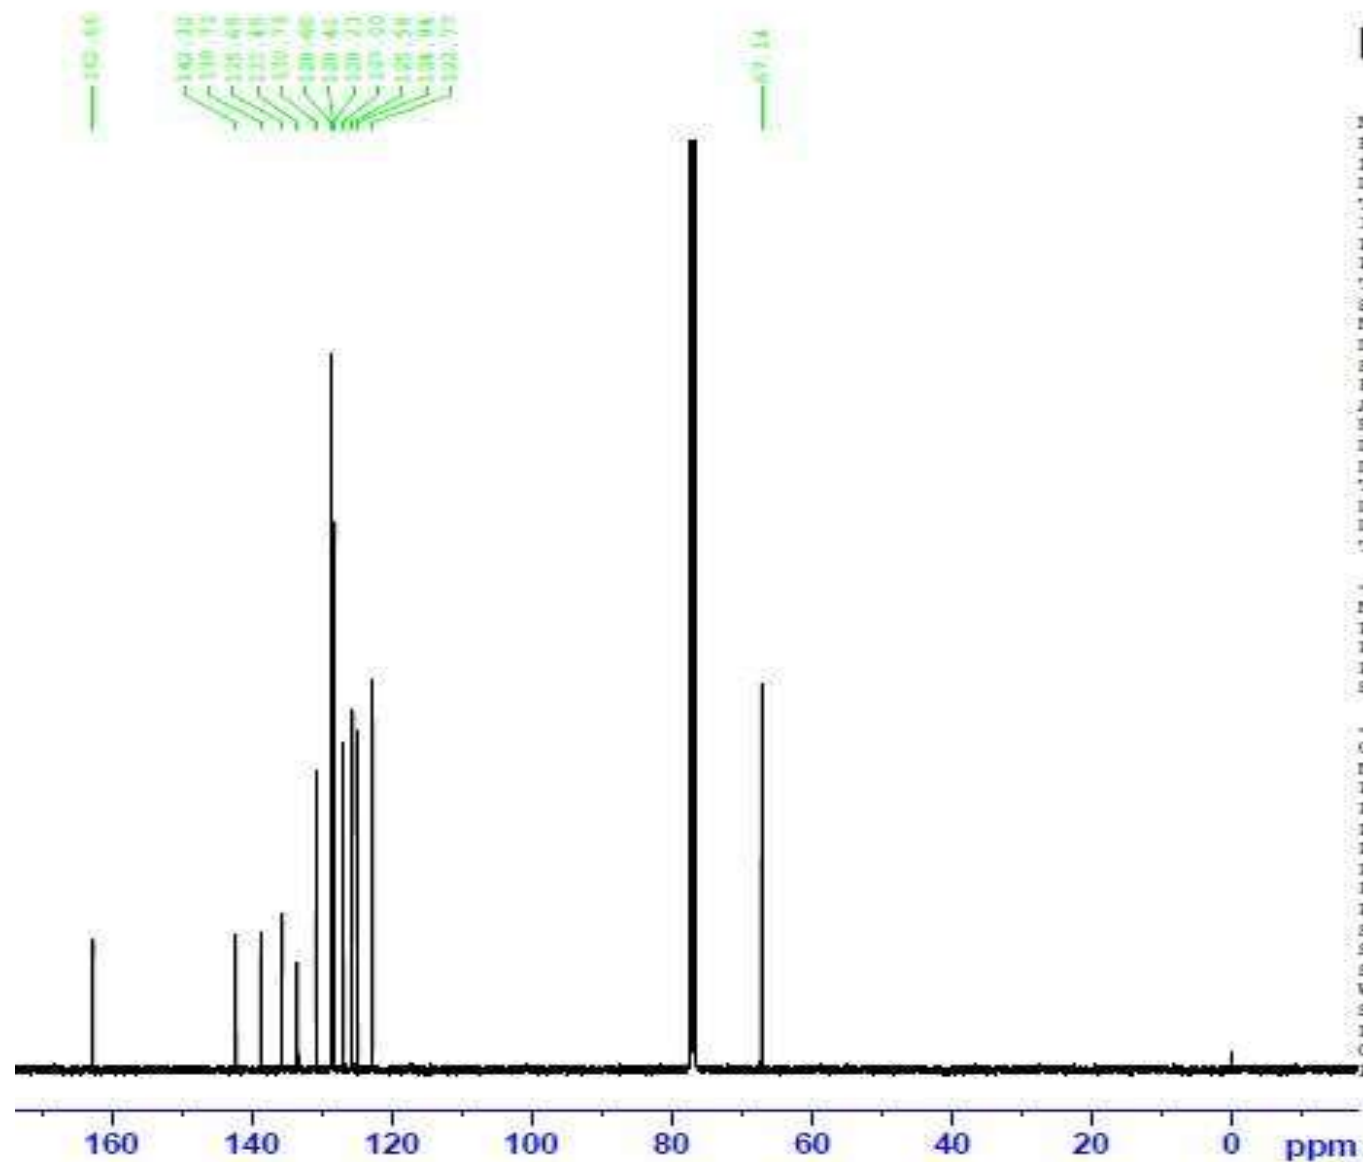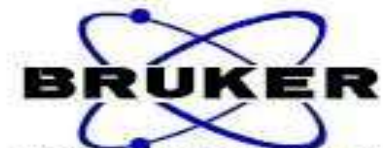

NAME Audrey Isabelle  
EXPNO 9  
PROCNO 1  
Date\_ 20190131  
Time\_ 14.30  
INSTRUM spect  
PROBHD 5 mm DSSBO BB-  
PULPROG zgpg30  
TD 65536  
SOLVENT CDCl3  
NS 3349  
DS 4  
SWH 24038.461 Hz  
FIDRES 0.366798 Hz  
AQ 1.3631988 sec  
RG 203  
DW 20.800 usec  
DE 6.50 usec  
TE 298.0 K  
D1 2.00000000 sec  
D11 0.03000000 sec  
TD0 1

----- CHANNEL F1 -----  
NUC1 13C  
P1 9.90 usec  
PL1 -1.90 dB  
PL1W 56.02249908 W  
SFO1 100.6228298 MHz

----- CHANNEL F2 -----  
CPDPRG2 waltz65  
NUC2 1H  
DCPD2 80.00 usec  
PL2 0.30 dB  
PL12 15.40 dB  
PL13 18.40 dB  
PL2W 11.25229836 W  
PL12W 0.34772930 W  
PL13W 0.17427748 W  
SFO2 400.1316005 MHz  
SI 32768  
SF 100.6127690 MHz  
WDW EM  
SSB 0  
LB 1.00 Hz  
GB 0  
PC 1.40

HRMS

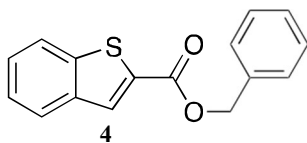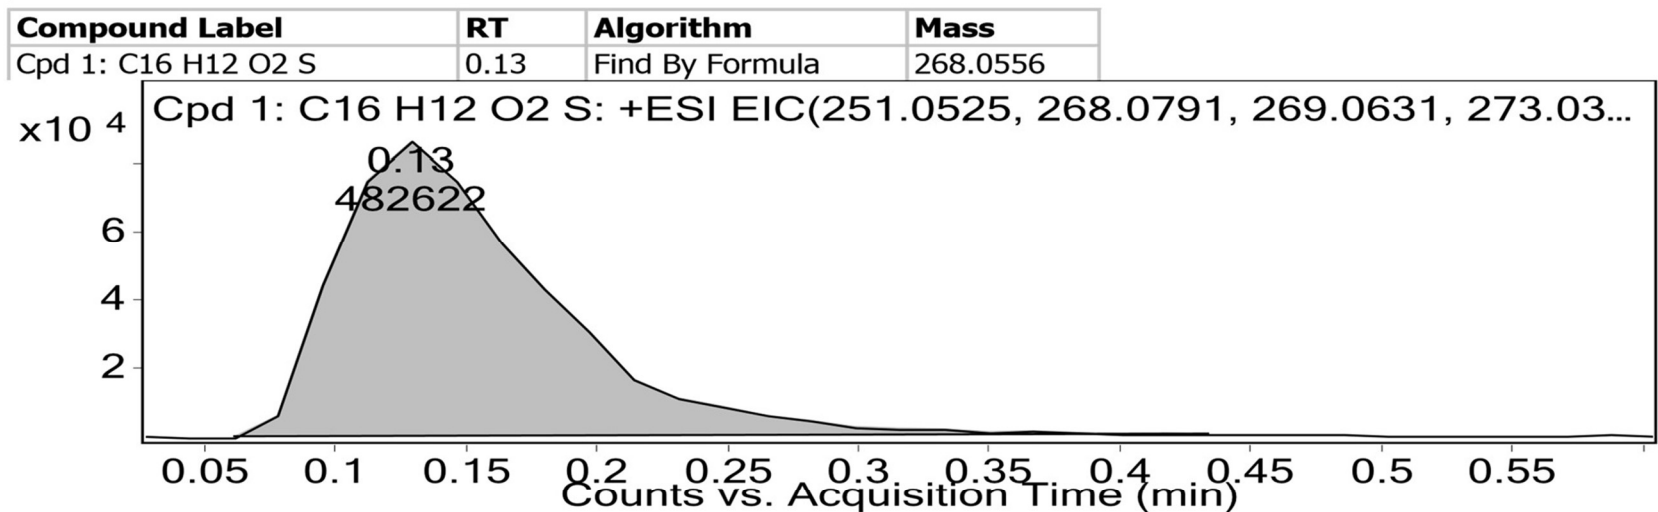

MS Spectrum

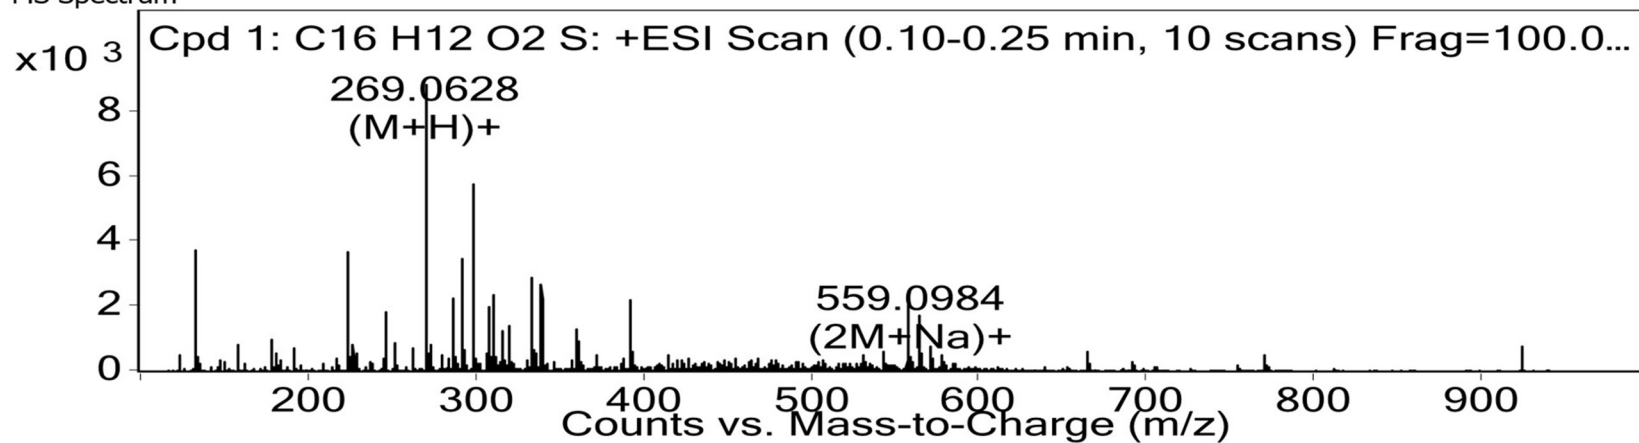

<sup>1</sup>H NMR

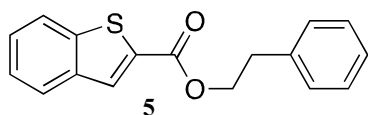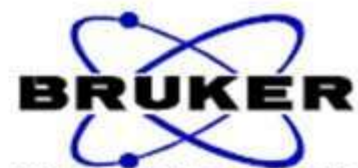

```
NAME      Audrey Isabelle
EXPNO     1
PROCNO    1
Date_     20181017
Time      15.59
INSTRUM   spect
PROBHD    5 mm DABBO BB-
PULPROG   zg30
TD        65536
SOLVENT   CDCl3
NS        16
DS        2
SWH       8223.685 Hz
FIDRES    0.125483 Hz
AQ        3.9846387 sec
RG        90.5
DW        60.800 usec
DE        6.50 usec
TE        298.0 K
D1        1.00000000 sec
TDO       1
```

```
----- CHANNEL f1 -----
NUC1      1H
P1        14.07 usec
PL1       0.30 dB
PL1W      11.25229836 W
SFO1      400.1324710 MHz
SI        32768
SF        400.1300000 MHz
WDW       EM
SSB       0
LB        0.30 Hz
GB        0
PC        1.00
```

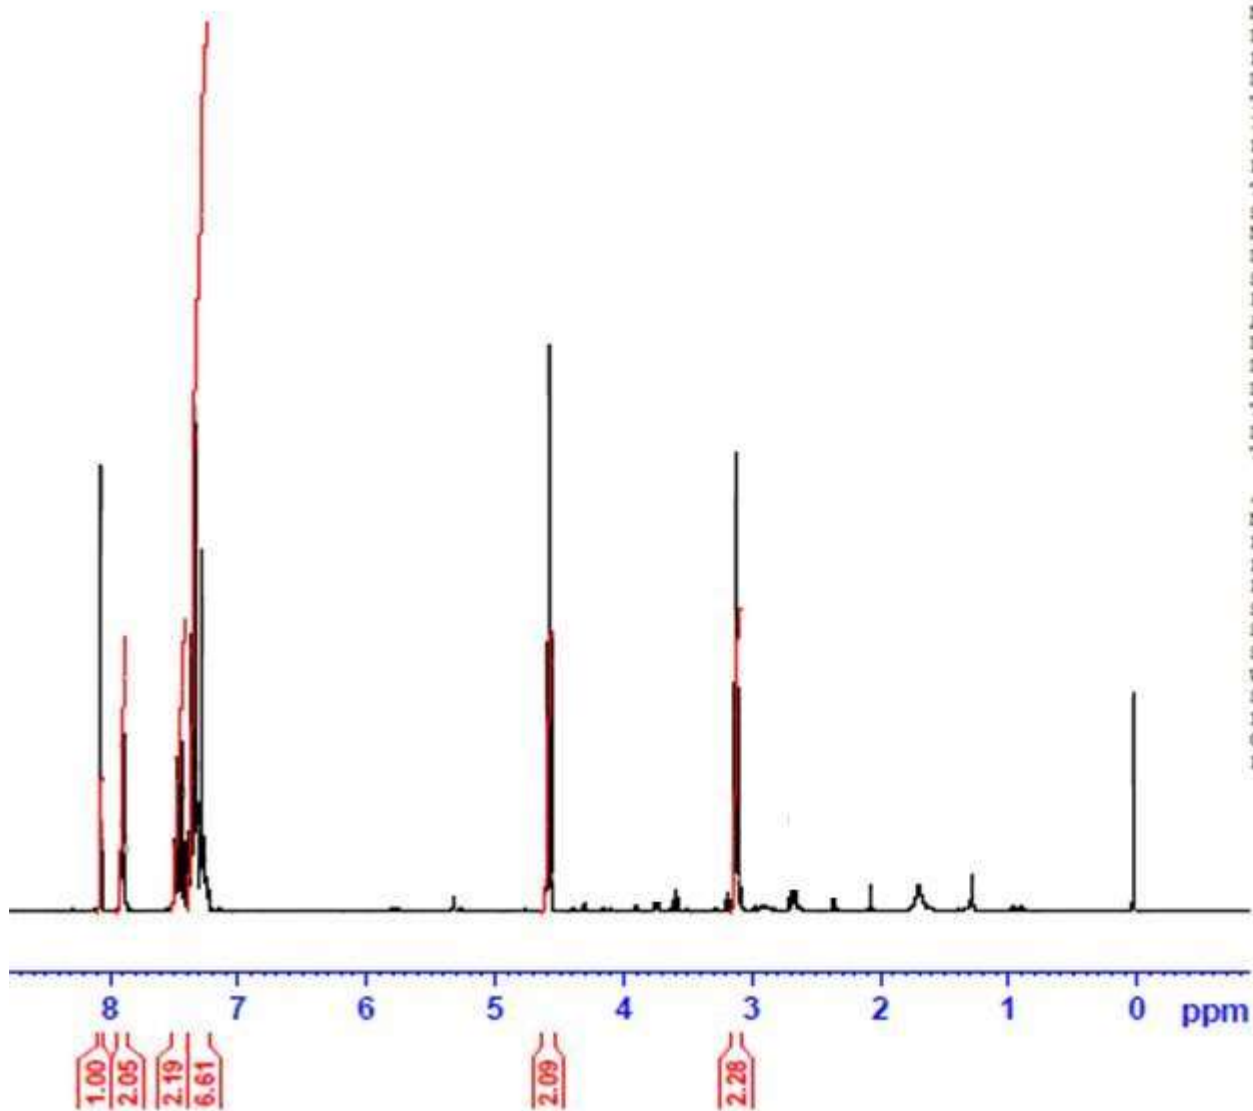

<sup>13</sup>C NMR

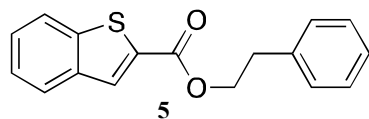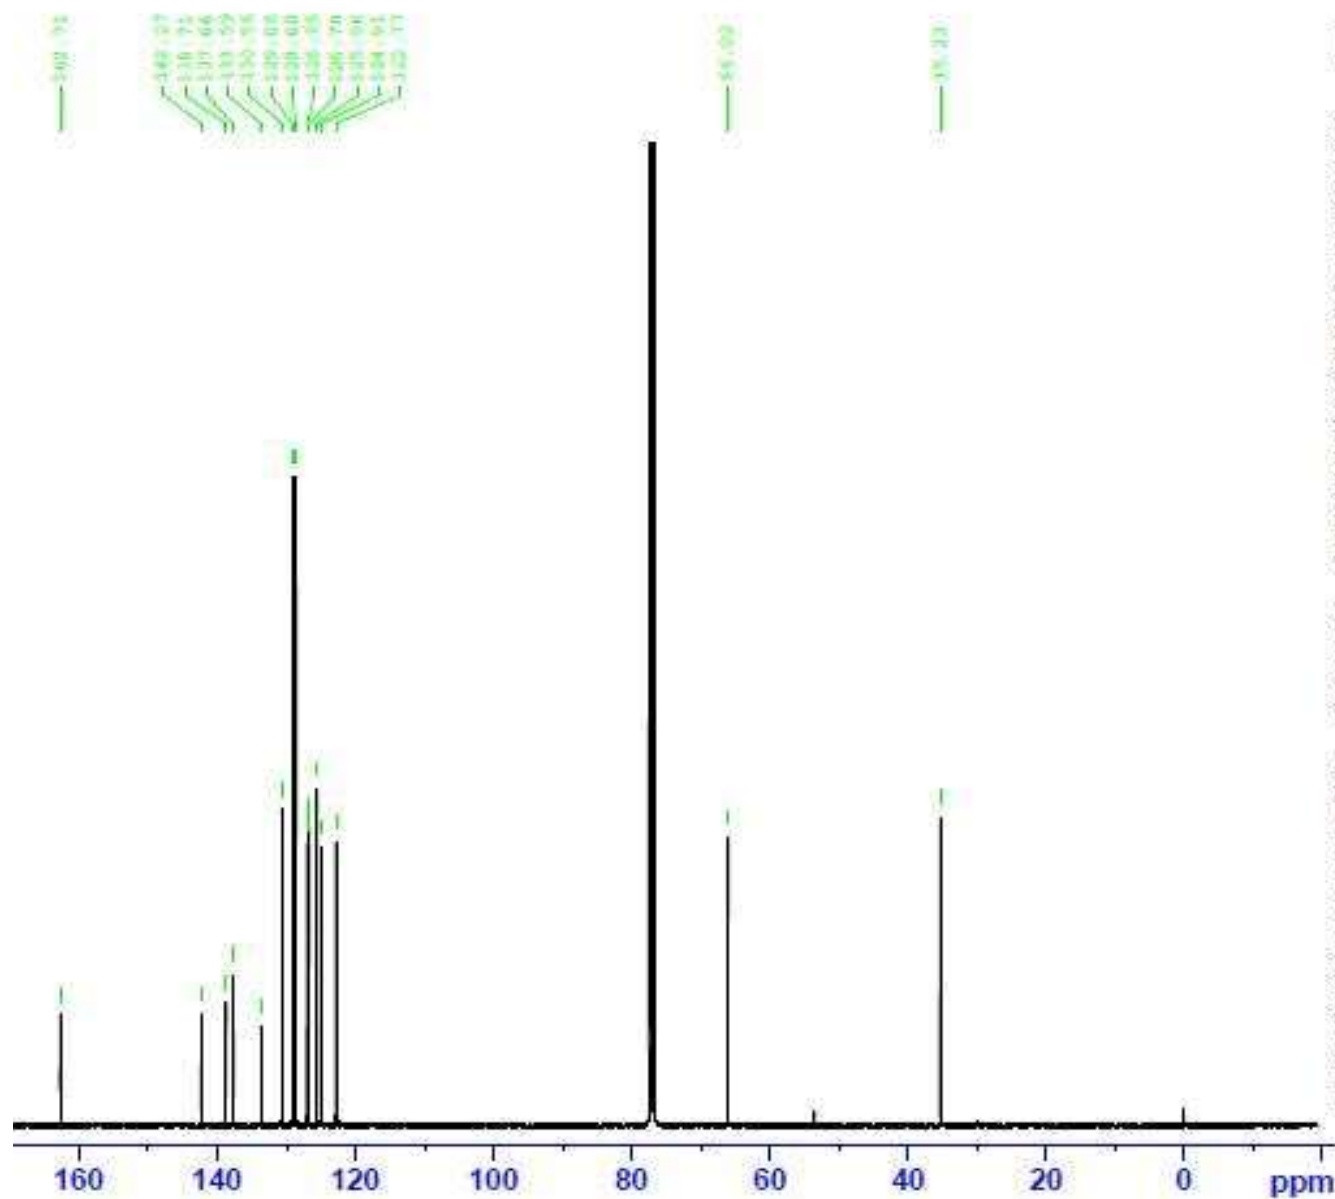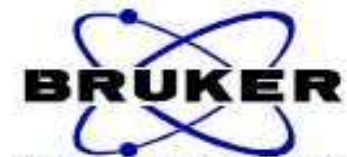

NAME Audrey Isabelle  
EXPNO 4  
PROCNO 1  
Date\_ 20181107  
Time 20.47  
INSTRUM spect  
PROBHD 5 mm DABBO BB-  
PULPROG zgpg30  
TD 65536  
SOLVENT CDCl3  
NS 5000  
DS 4  
SWH 24038.461 Hz  
FIDRES 0.366798 Hz  
AQ 1.3631988 sec  
RG 203  
DW 20.800 usec  
DE 6.50 usec  
TE 298.0 K  
D1 2.00000000 sec  
D11 0.03000000 sec  
TD0 1

----- CHANNEL F1 -----  
NUC1 13C  
P1 9.90 usec  
PL1 -1.90 dB  
PL1W 56.02245908 W  
SFO1 100.6228298 MHz

----- CHANNEL F2 -----  
CPDPRG2 waltz65  
NUC2 1H  
PCPD2 80.00 usec  
PL2 0.30 dB  
PL12 15.40 dB  
PL13 18.40 dB  
PL2W 11.25229836 W  
PL12W 0.34772930 W  
PL13W 0.17427748 W  
SFO2 400.1316005 MHz  
SI 32768  
SF 100.6127690 MHz  
WDW EM  
SSB 0  
LB 1.00 Hz  
GB 0  
PC 1.40

HRMS

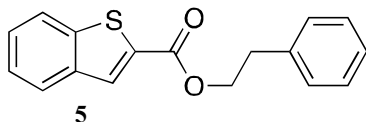

| Compound Label      | RT   | Algorithm       | Mass     |
|---------------------|------|-----------------|----------|
| Cpd 1: C17 H14 O2 S | 0.13 | Find By Formula | 282.0712 |

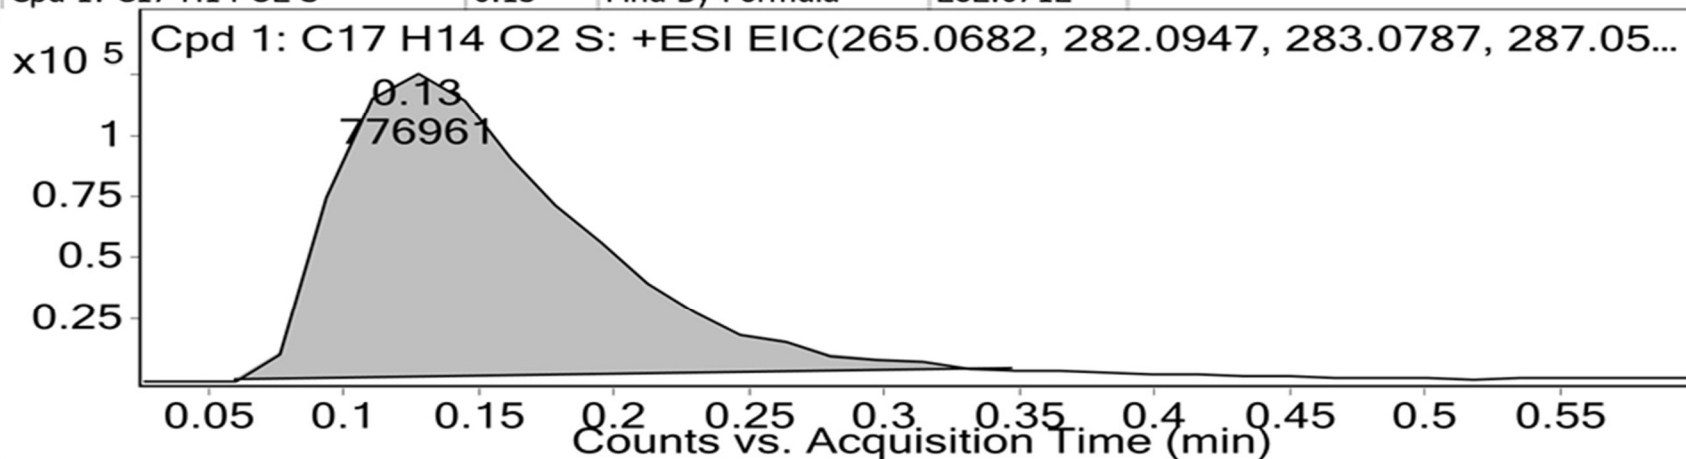

MS Spectrum

MS Zoomed Spectrum

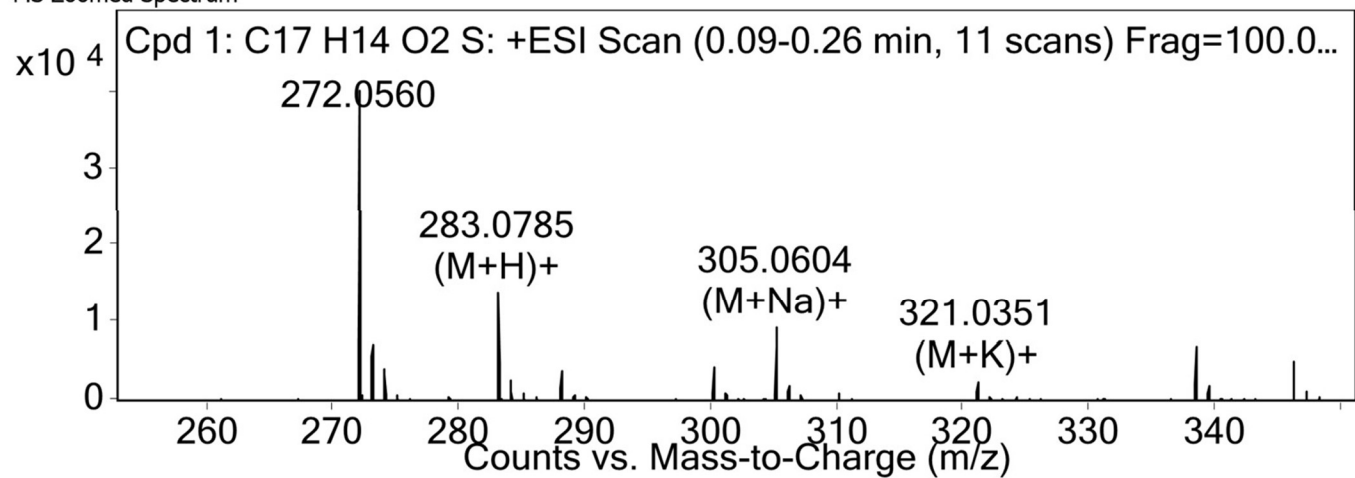

<sup>1</sup>H NMR

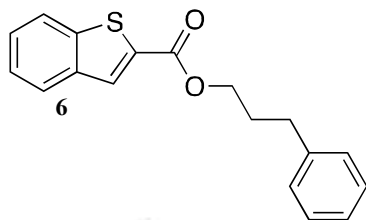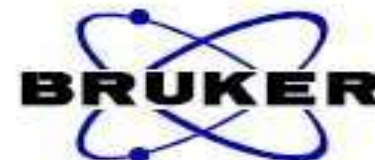

NAME Audrey Isabelle  
EXPNO 5  
PROCNO 1  
Date\_ 20181115  
Time 13.24  
INSTRUM spect  
PROBHD 5 mm DABBO BB-  
PULPROG zg30  
TD 65536  
SOLVENT CDCl3  
NS 16  
DS 2  
SWH 8223.685 Hz  
FIDRES 0.125483 Hz  
AQ 3.9846387 sec  
RG 101  
DW 60.800 usec  
DE 6.50 usec  
TE 297.9 K  
D1 1.00000000 sec  
TD0 1

----- CHANNEL F1 -----  
NUC1 1H  
P1 14.07 usec  
PL1 0.30 dB  
PL1W 11.25229836 W  
SFO1 400.1324710 MHz  
SI 32768  
SF 400.1300000 MHz  
WDW EM  
SSB 0  
LB 0.30 Hz  
GB 0  
PC 1.00

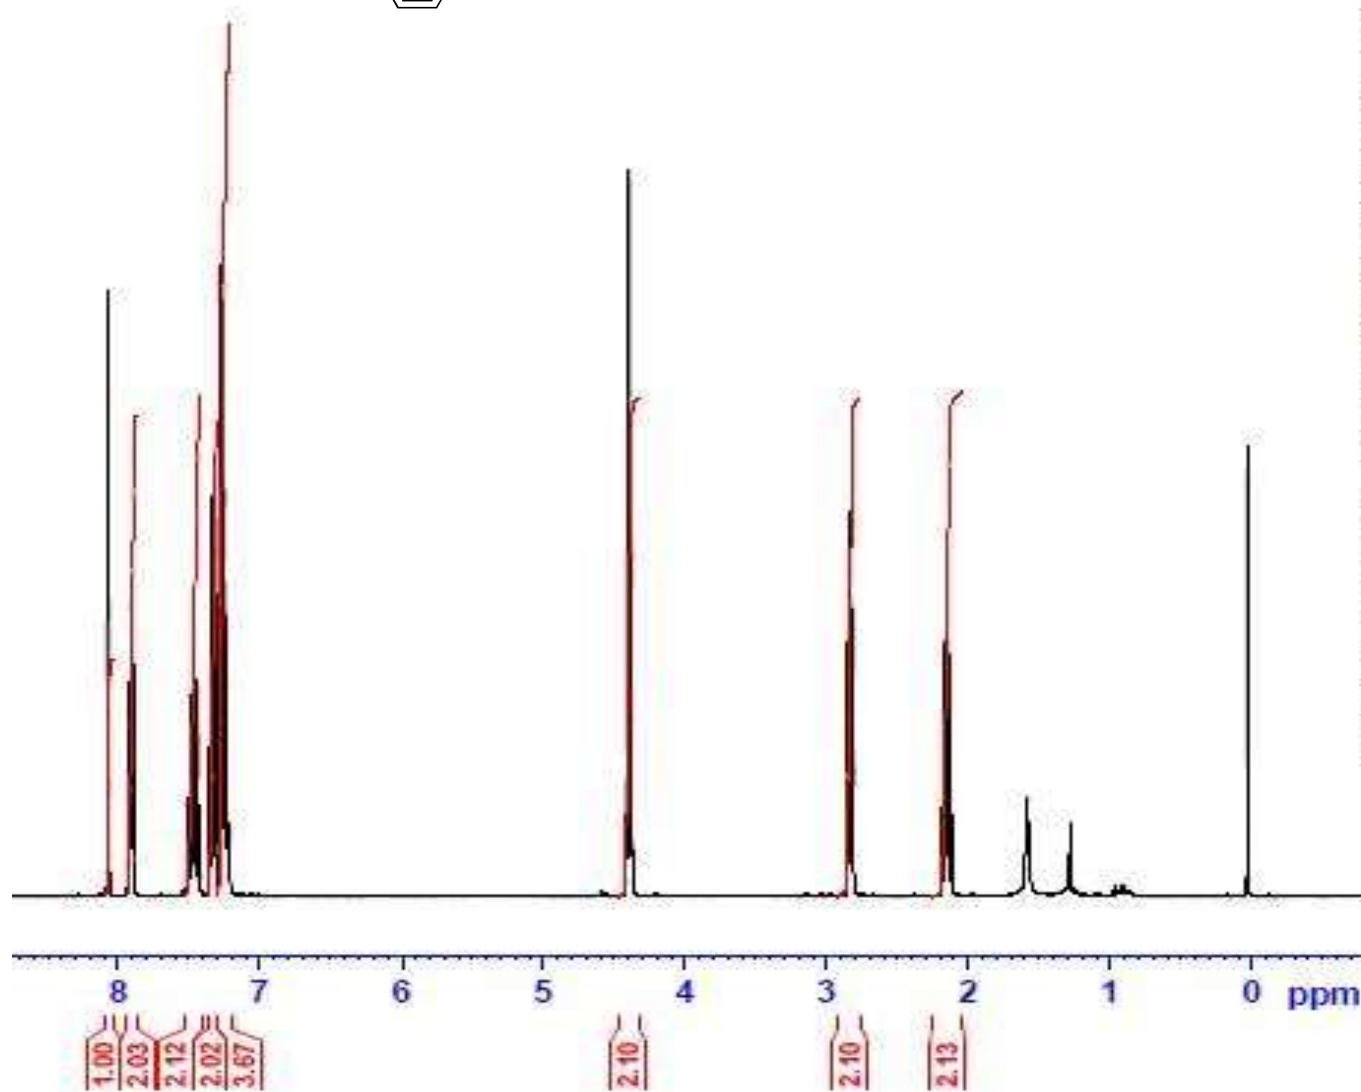



<sup>13</sup>C NMR

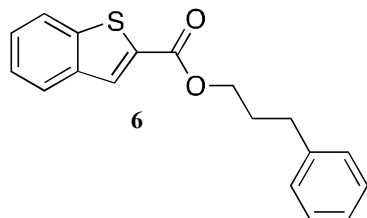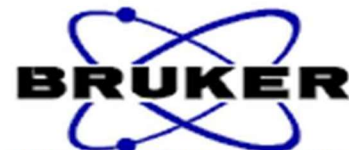

NAME Audrey Isabelle  
EXPNO 6  
PROCNO 1  
Date\_ 20181115  
Time\_ 19.58  
INSTRUM spect  
PROBHD 5 mm PABBO BB-  
PULPROG zgpg30  
TD 65536  
SOLVENT CDCl3  
NS 5000  
DS 4  
SWH 24038.461 Hz  
FIDRES 0.366798 Hz  
AQ 1.3631988 sec  
RG 114  
DW 20.800 usec  
DE 6.50 usec  
TE 298.0 K  
D1 2.00000000 sec  
D11 0.03000000 sec  
TDO 1

----- CHANNEL f1 -----  
NUC1 13C  
P1 9.90 usec  
PL1 -1.90 dB  
PL1W 56.02249908 W  
SFO1 100.6228298 MHz

----- CHANNEL f2 -----  
CPDPRG2 waltz65  
NUC2 1H  
PCPD2 80.00 usec  
PL2 0.30 dB  
PL12 15.40 dB  
PL13 18.40 dB  
PL2W 11.25229836 W  
PL12W 0.34772930 W  
PL13W 0.17427748 W  
SFO2 400.1316005 MHz  
SI 32768  
SF 100.6127690 MHz  
WDW EM  
SSB 0  
LB 1.00 Hz  
CB 0  
PC 1.40

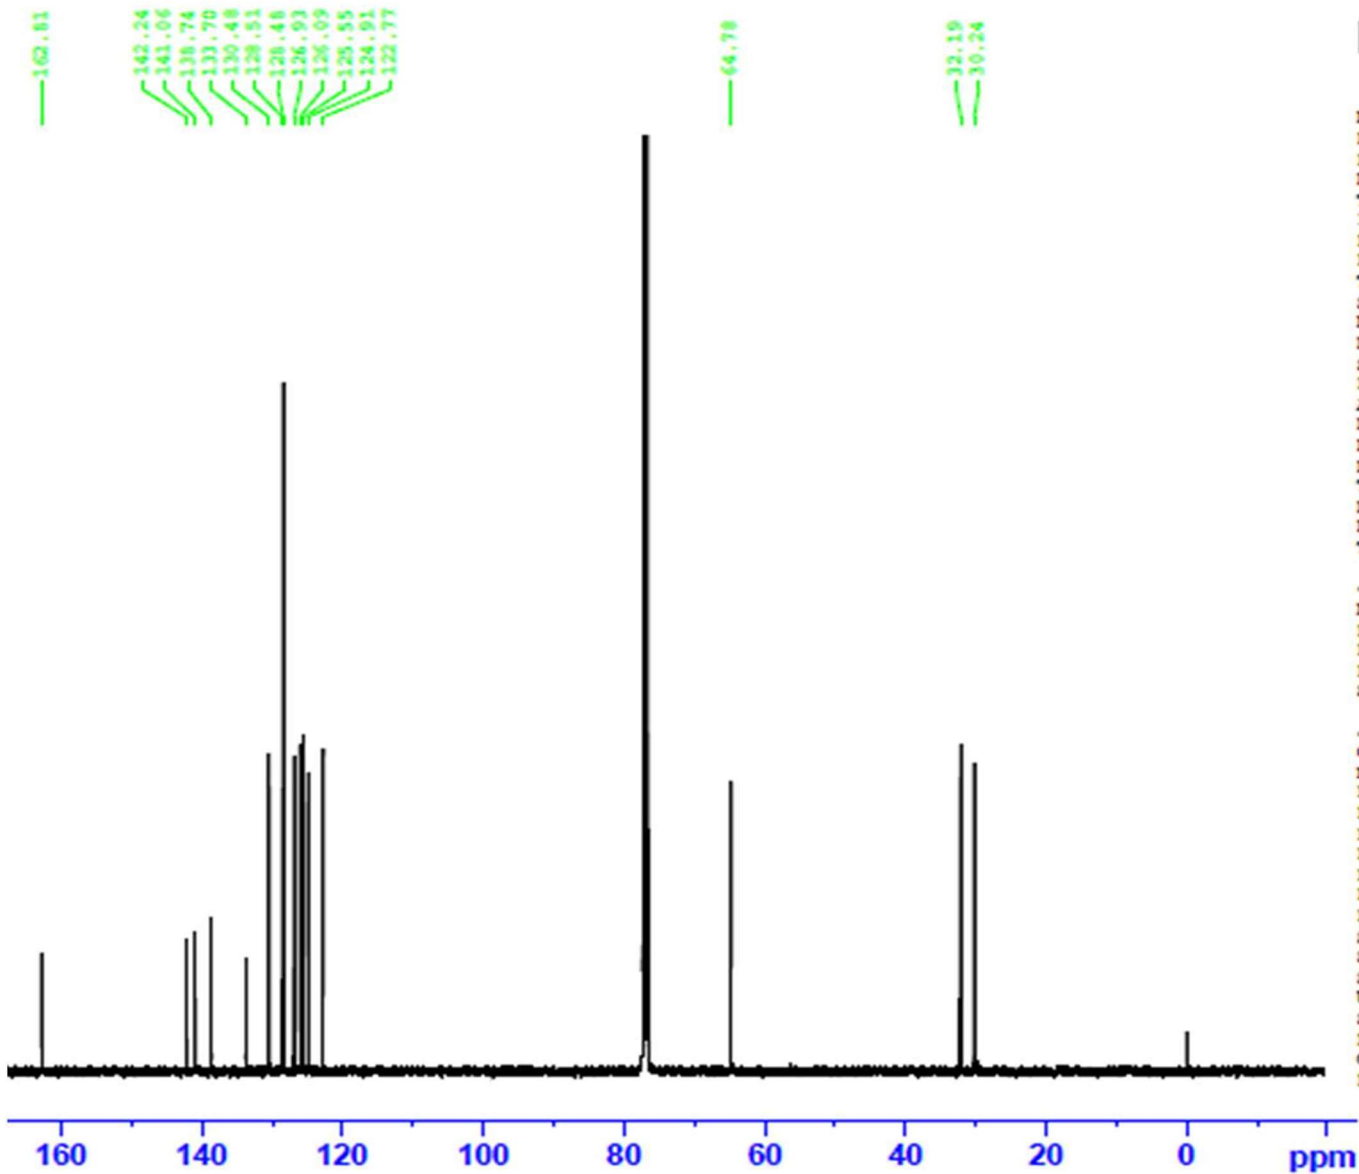

HRMS

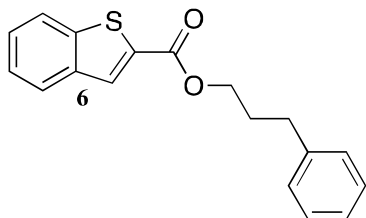

| Compound Label      | RT   | Algorithm       | Mass     |
|---------------------|------|-----------------|----------|
| Cpd 1: C18 H16 O2 S | 0.12 | Find By Formula | 296.0872 |

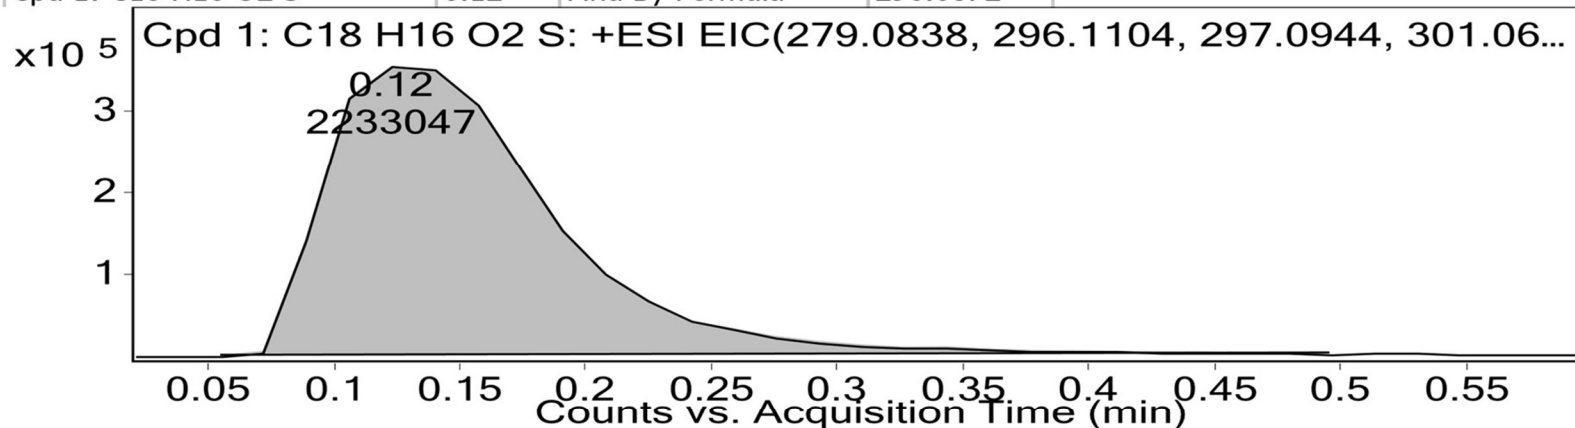

MS Spectrum

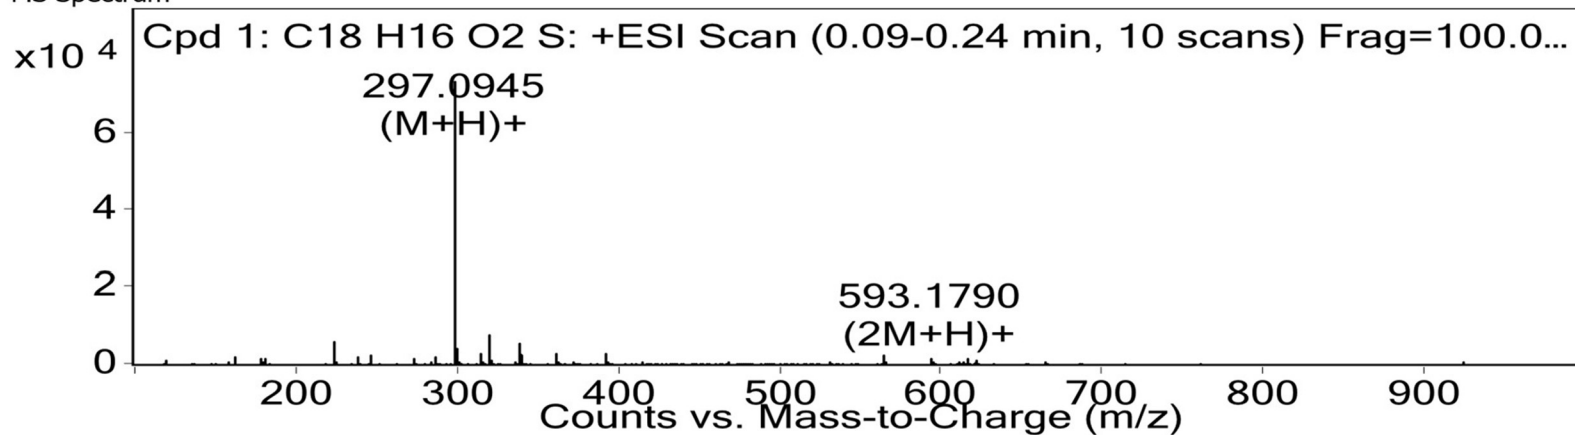

<sup>1</sup>H NMR

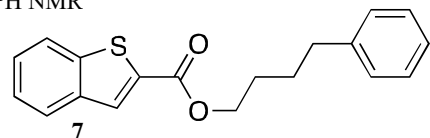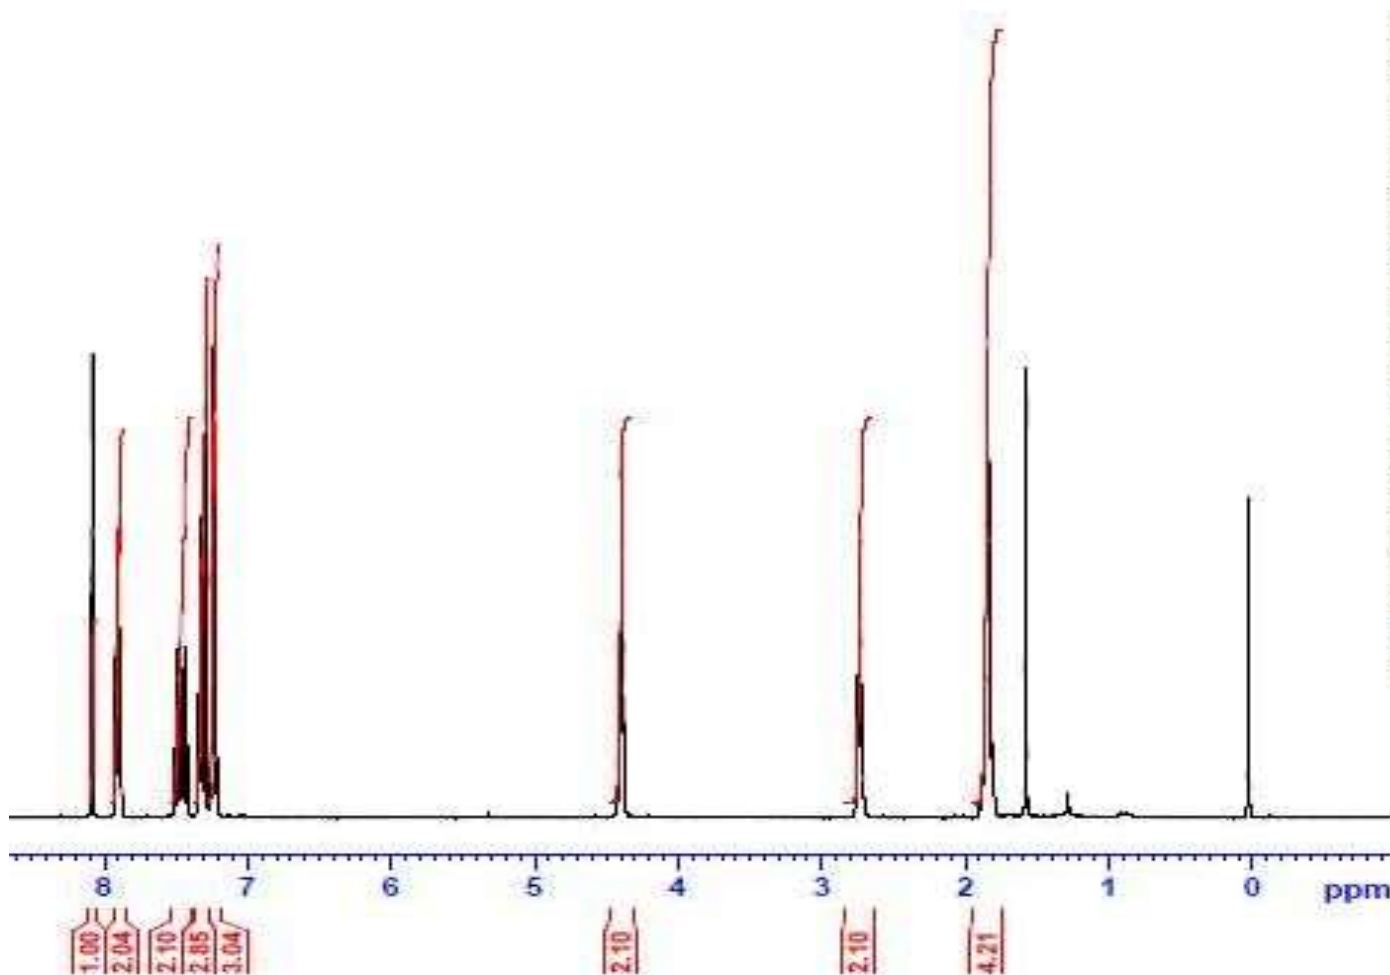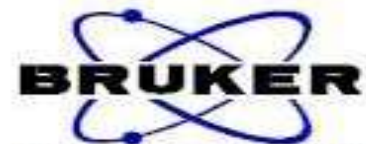

NAME Audrey Isabelle  
EXPNO 10  
PROCNO 1  
Date\_ 20190204  
Time 15.17  
INSTRUM spect  
PROBHD 5 mm DABBO BB-  
PULPROG zg30  
TD 65536  
SOLVENT CDCl3  
NS 16  
DS 2  
SWH 8223.685 Hz  
FIDRES 0.125483 Hz  
AQ 3.9846387 sec  
RG 114  
INW 60.800 usec  
DE 6.50 usec  
TE 298.0 K  
D1 1.00000000 sec  
TD0 1

----- CHANNEL f1 -----  
NUC1 1H  
P1 14.07 usec  
PL1 0.30 dB  
PL1W 11.25229836 W  
SFO1 400.1324710 MHz  
SI 32768  
SF 400.1300000 MHz  
WDW EM  
SSB 0  
LB 0.30 Hz  
GB 0  
PC 1.00

<sup>13</sup>C NMR

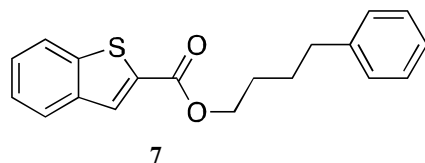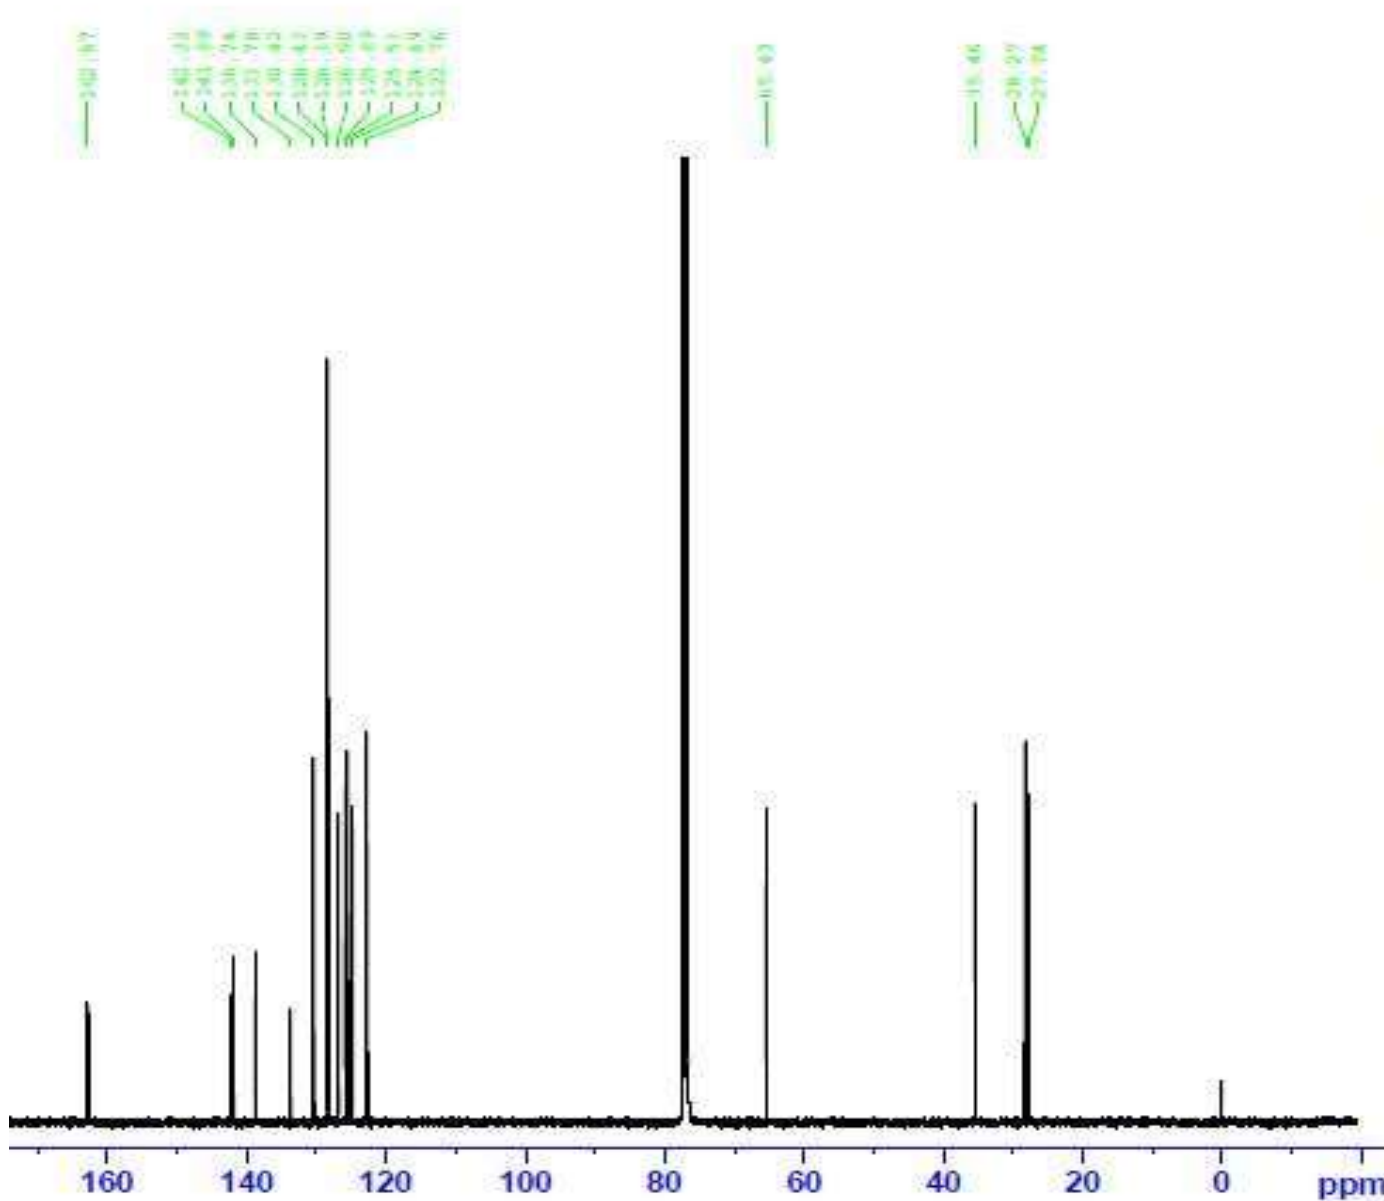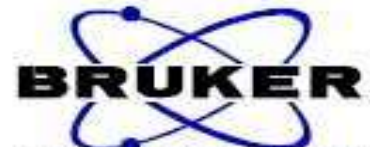

```
NAME Audrey Isabelle
EXPNO 11
PROCNO 1
Date_ 20190205
Time_ 0.51
INSTRUM spect
PROBHD 5 mm DABBO BB-
PULPROG zgpg30
TD 65536
SOLVENT CDCl3
NS 10000
DS 4
SWH 24038.461 Hz
FIDRES 0.366798 Hz
AQ 1.3631988 sec
RG 203
DW 20.800 usec
DE 6.50 usec
TE 298.0 K
D1 2.00000000 sec
D11 0.03000000 sec
TDG 1
```

```
----- CHANNEL f1 -----
NUC1 13C
P1 9.90 usec
PL1 -1.90 dB
PL1W 56.02249908 W
SFO1 100.6228298 MHz
```

```
----- CHANNEL f2 -----
CDDPRG2 waltz65
NUC2 1H
PCPD2 80.00 usec
PL2 0.30 dB
PL12 15.40 dB
PL13 18.40 dB
PL2W 11.25229836 W
PL12W 0.34772930 W
PL13W 0.17427748 W
SFO2 400.1316005 MHz
SI 32768
SF 100.6127690 MHz
WDW EM
SSB 0
LB 1.00 Hz
GB 0
PC 1.40
```

HRMS

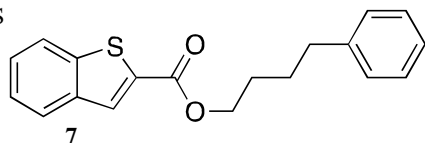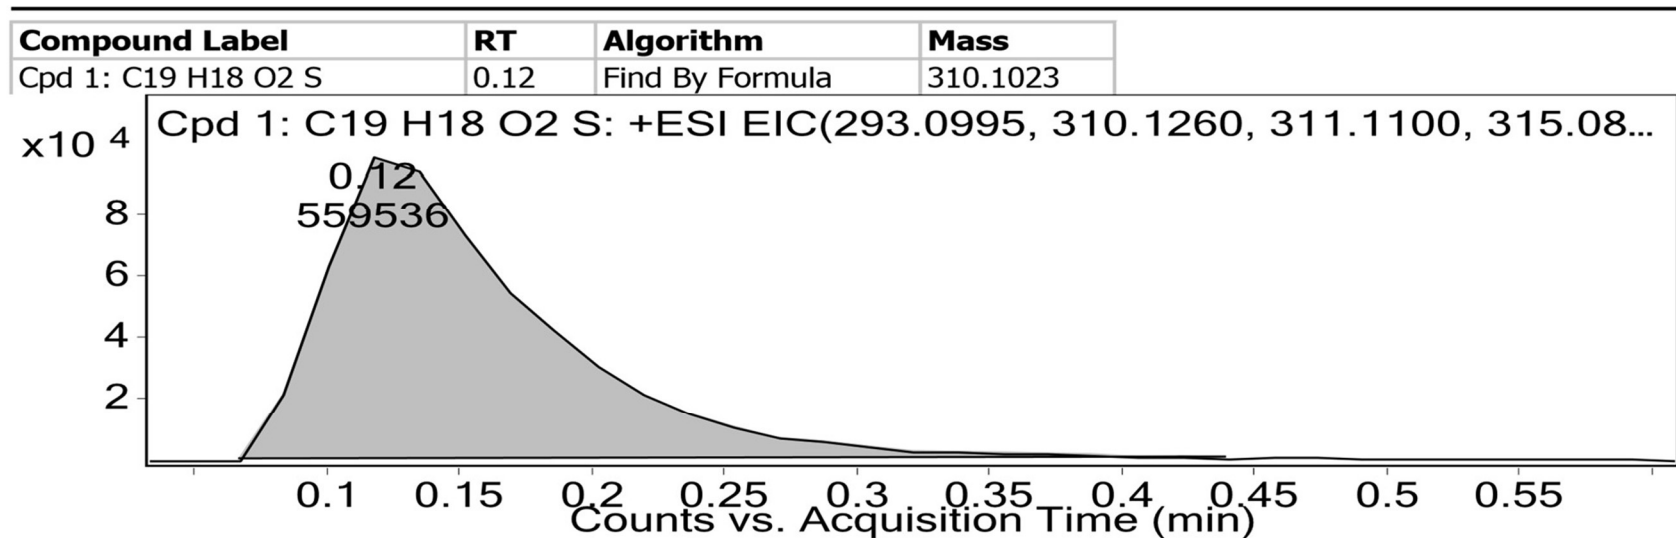

MS Spectrum

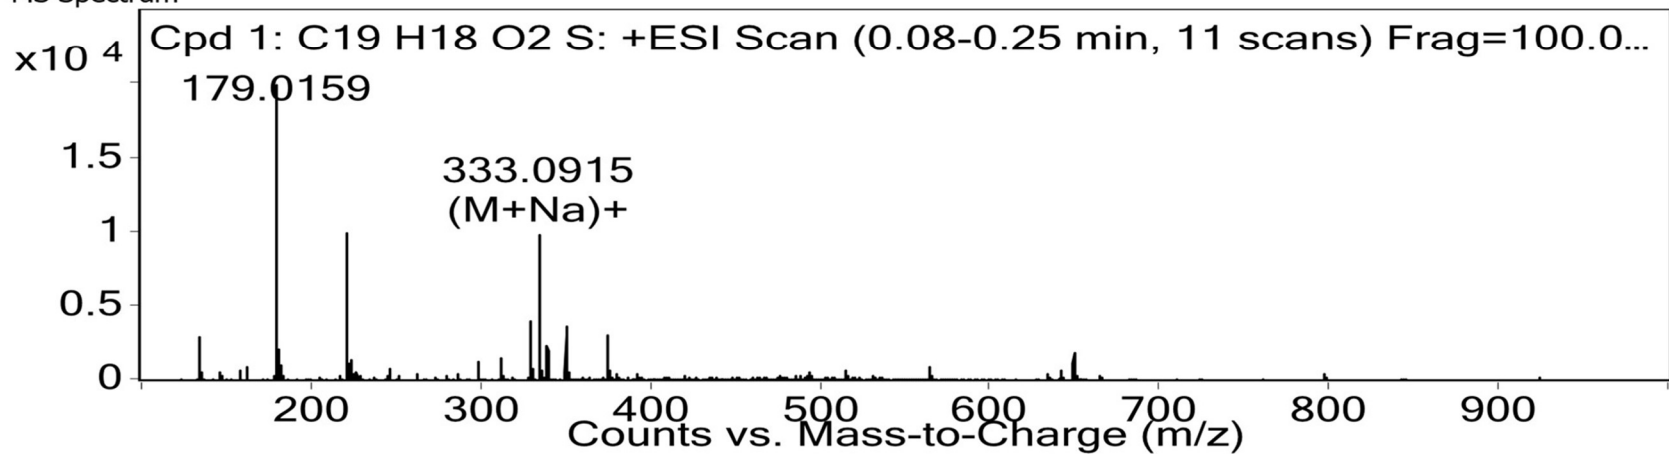

<sup>1</sup>H NMR

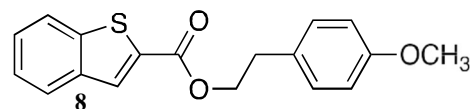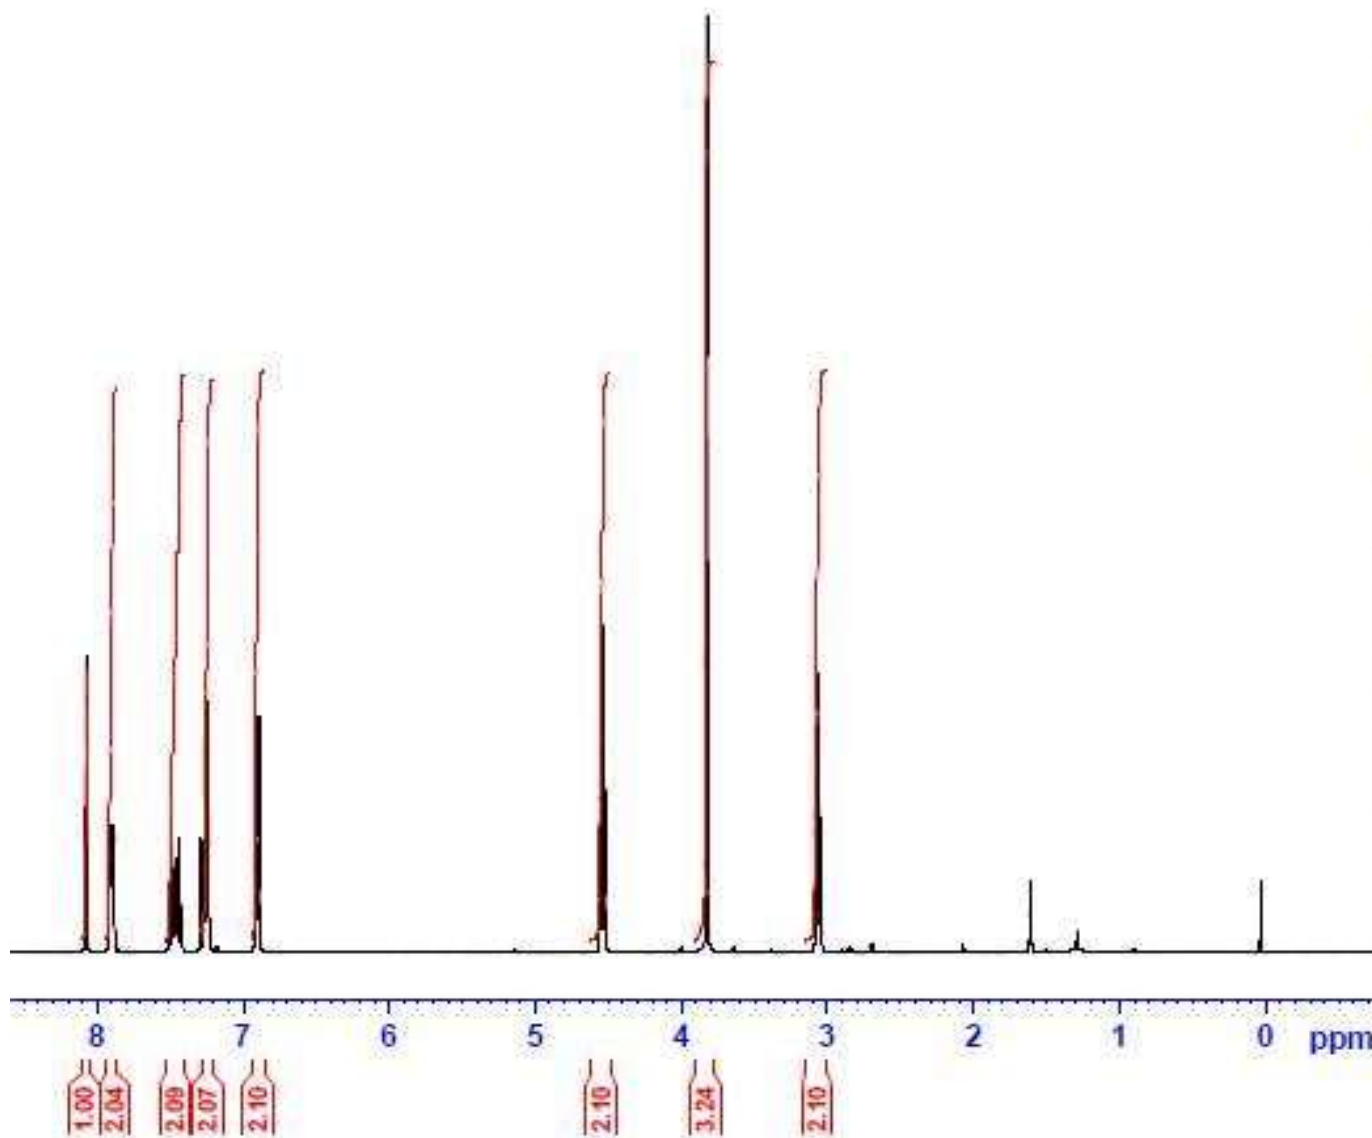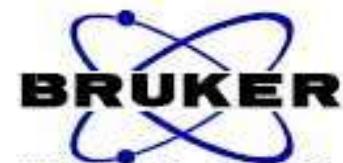

NAME Audrey Isabelle  
EXPNO 12  
PROCNO 1  
Date\_ 20190211  
Time 10.35  
INSTRUM spect  
PROBHD 5 mm PASPO BB-  
PULPROG zg30  
TD 65536  
SOLVENT CDCl3  
NS 16  
DS 2  
SWH 8223.685 Hz  
FIDRES 0.125483 Hz  
AQ 3.9846387 sec  
RG 80.6  
DW 60.800 usec  
DE 6.50 usec  
TE 298.0 K  
D1 1.00000000 sec  
TD0 1

----- CHANNEL F1 -----  
NUC1 1H  
P1 14.07 usec  
PL1 0.30 dB  
PL1W 11.25229836 W  
SFO1 400.1324710 MHz  
S1 32768  
SF 400.1300000 MHz  
WDW EM  
SSB 0  
LB 0.30 Hz  
GB 0  
PC 1.00

<sup>13</sup>C NMR

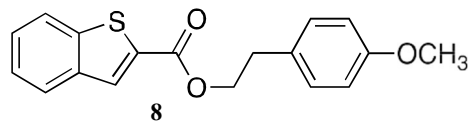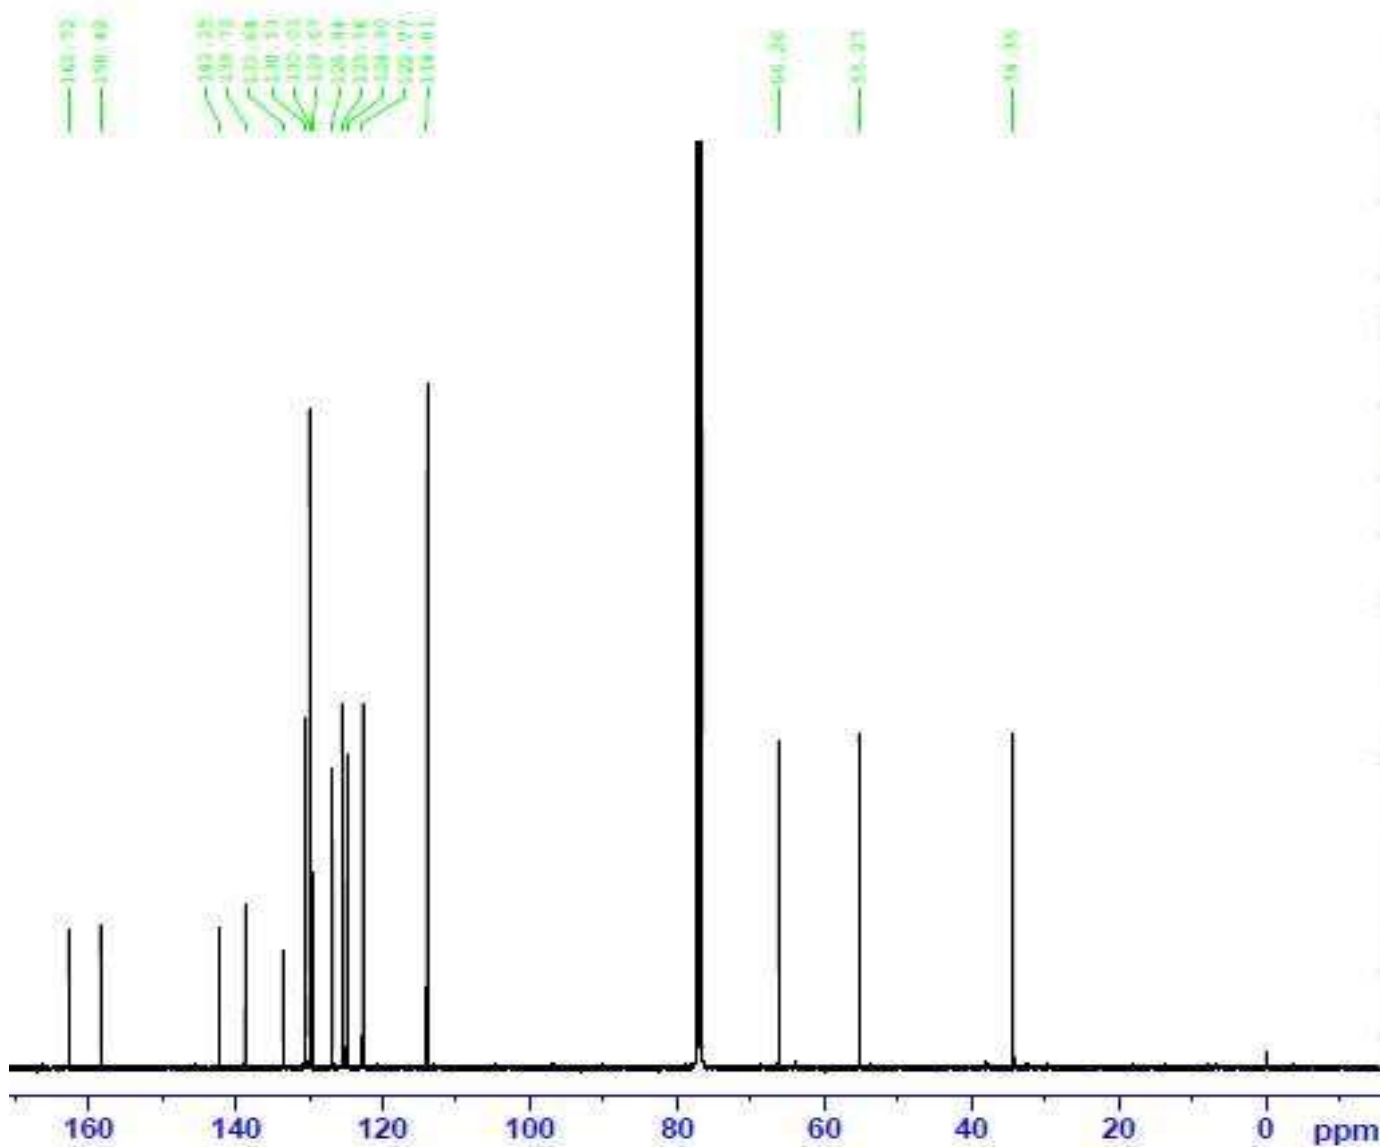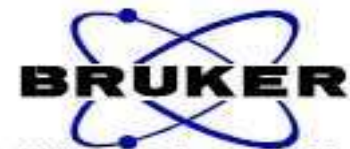

```
NAME      Audrey Isabelle
EXPNO     13
PROCNO    1
Date_     20190211
Time      16.02
INSTRUM   spect
PROBHD    5 mm DABBO BB-
PULPROG   zgpg30
TD        65536
SOLVENT   CDCl3
NS        5702
DS        4
SWH       24038.461 Hz
FIDRES    0.366798 Hz
AQ        1.3631988 sec
RG        203
LW        20.800 usec
DE        6.50 usec
TE        298.0 K
D1        2.00000000 sec
D11       0.03000000 sec
TD0       1

----- CHANNEL F1 -----
NUC1      13C
P1        9.90 usec
PL1       -1.90 dB
PL1W      56.02249908 W
SFO1      100.6228298 MHz

----- CHANNEL F2 -----
CPDPRG2   waltz65
NUC2      1H
DCPD2     80.00 usec
PL2       0.30 dB
PL12     15.40 dB
PL13     18.40 dB
PL2W     11.25229836 W
PL12W    0.34772930 W
PL13W    0.17427748 W
SFO2     400.1316005 MHz
SI        32768
SF        100.6127690 MHz
WDW       EM
SSB       0
LB        1.00 Hz
GB        0
PC        1.40
```

HRMS

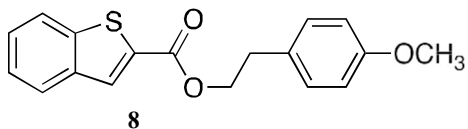

| Compound Label      | RT   | Algorithm       | Mass     |
|---------------------|------|-----------------|----------|
| Cpd 1: C18 H16 O3 S | 0.12 | Find By Formula | 312.0813 |

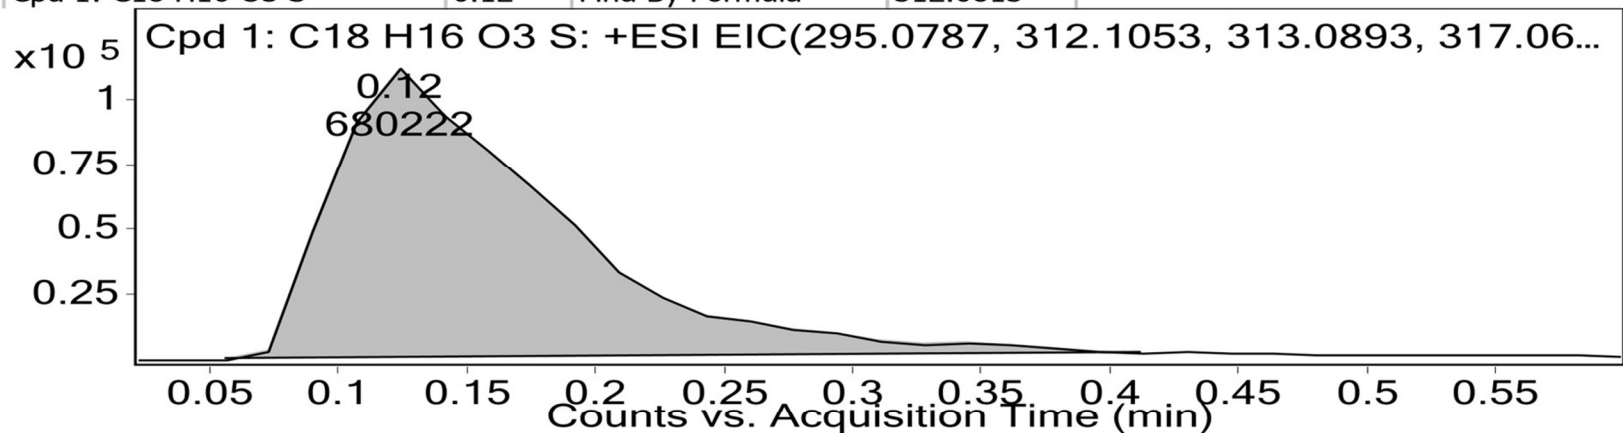

MS Spectrum

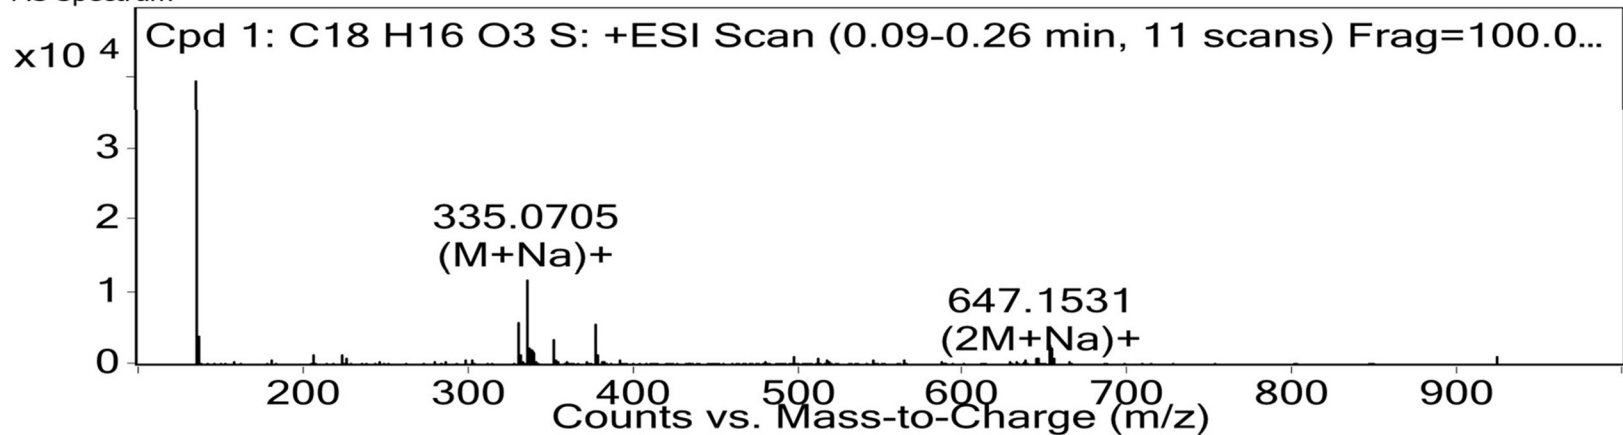



<sup>1</sup>H NMR

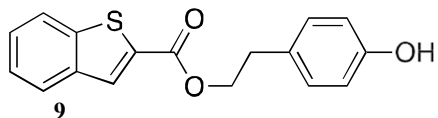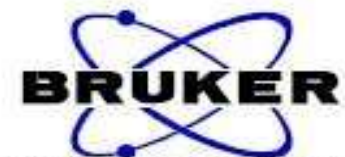

NAME Audrey Isabelle  
EXPNO 14  
PROCNO 1  
Date\_ 20190220  
Time\_ 15.04  
INSTRUM spect  
PROBHD E mm PABBO BB-  
PULPROG zg30  
TD 65536  
SOLVENT CDCl3  
NS 16  
DS 2  
SWH 8223.685 Hz  
FIDRES 0.125483 Hz  
AQ 3.9846387 sec  
RG 128  
DW 60.800 usec  
DE 6.50 usec  
TE 298.0 K  
D1 1.00000000 sec  
TD0 1

----- CHANNEL f1 -----  
NUC1 1H  
P1 14.07 usec  
PL1 0.30 dB  
PL1W 11.25229836 W  
SFO1 400.1324710 MHz  
SI 32768  
SF 400.1300000 MHz  
WDW EM  
SSB 0  
LB 0.30 Hz  
GB 0  
PC 1.00

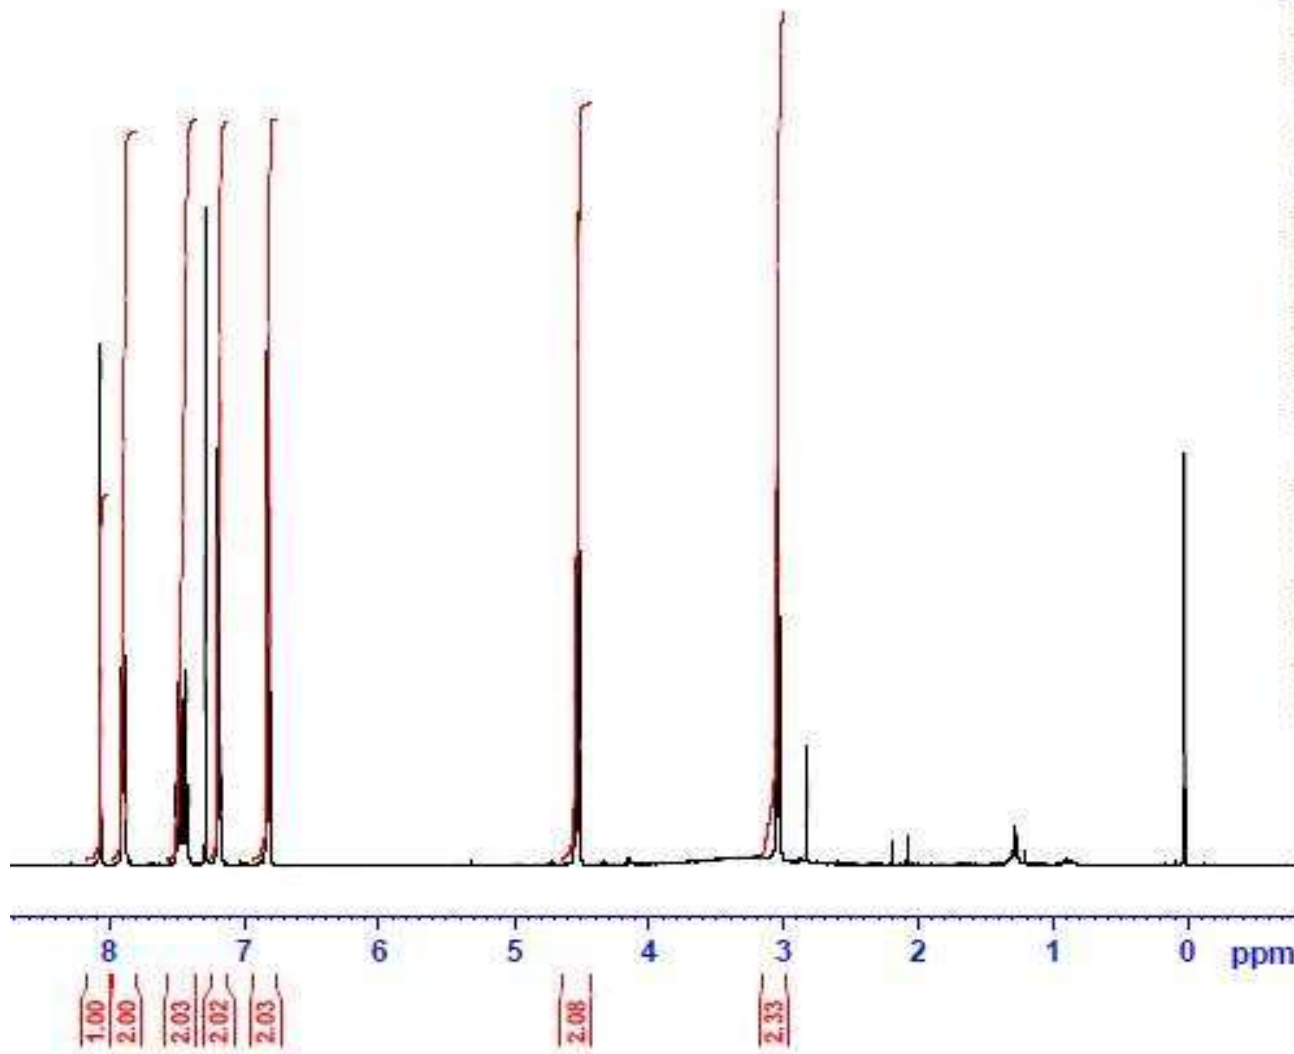

<sup>13</sup>C NMR

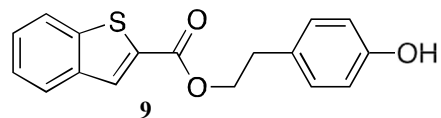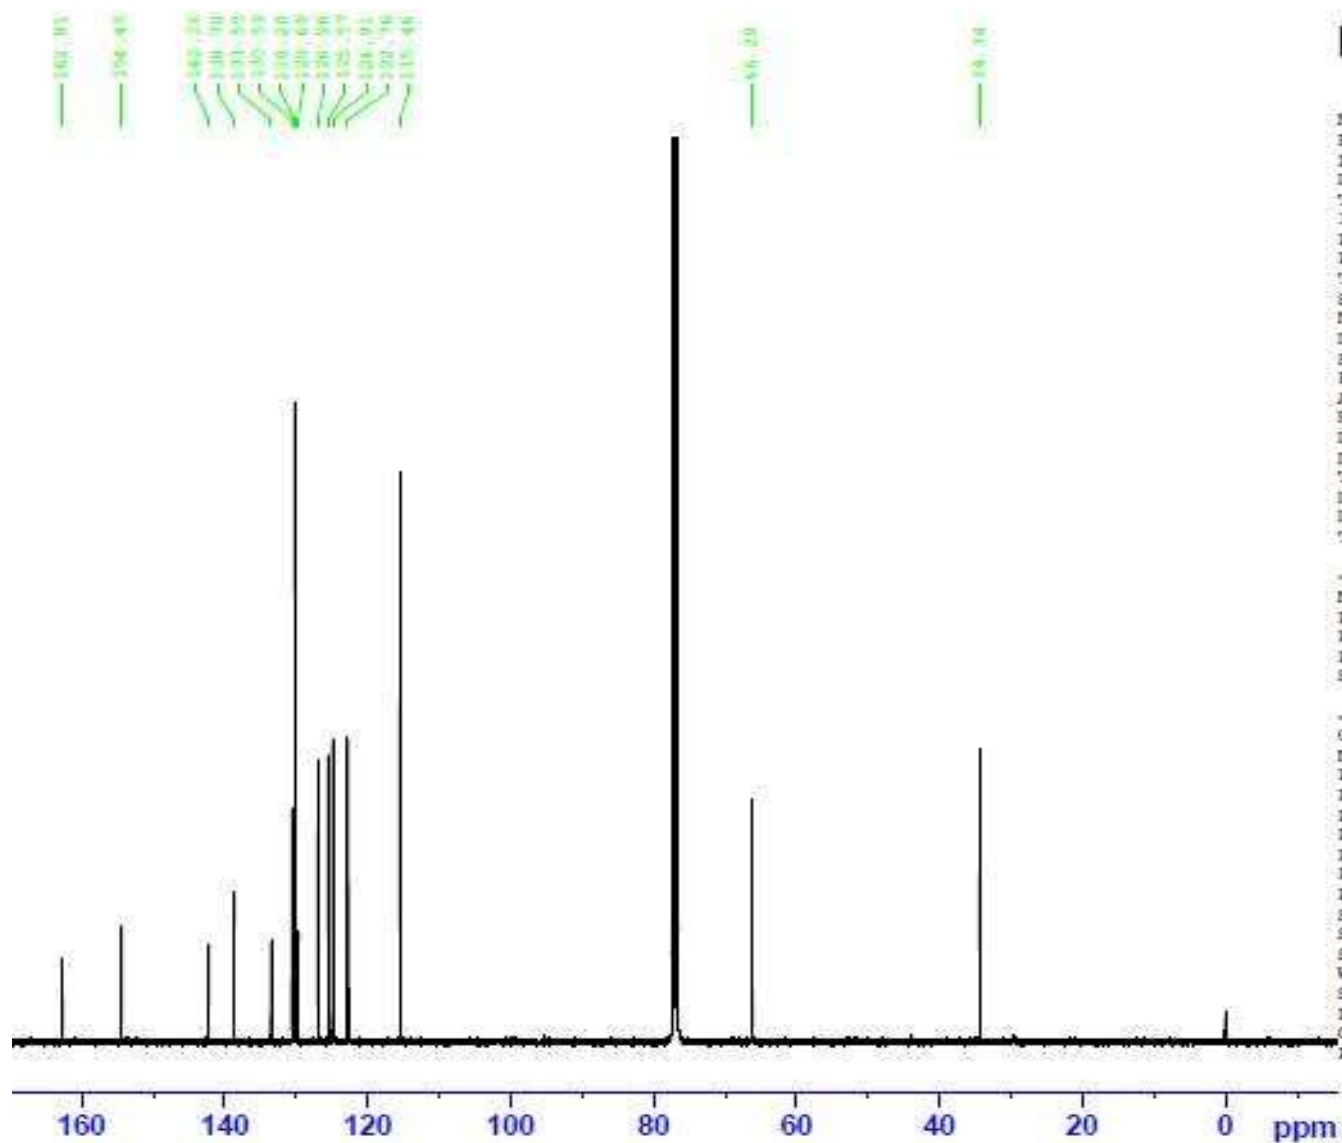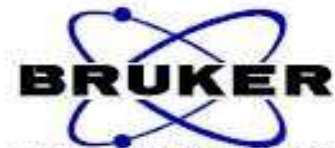

NAME Audrey Isabelle  
EXPNO 15  
PROCNO 1  
Date 20190221  
Time 0.51  
INSTRUM spect  
PROBHD 5 mm DABBO BB-  
PULPROG zgpg30  
TD 65536  
SOLVENT CDCl3  
NS 10000  
DS 4  
SWH 24038.461 Hz  
FIDRES 0.366798 Hz  
AQ 1.3631988 sec  
RG 203  
DW 20.800 usec  
DE 6.50 usec  
TE 298.0 K  
D1 2.00000000 sec  
D11 0.03000000 sec  
TD0 1

----- CHANNEL F1 -----  
NUC1 13C  
P1 9.90 usec  
PL1 -1.90 dB  
PL1W 56.02249908 W  
SFO1 100.6228298 MHz

----- CHANNEL F2 -----  
CPDPRG2 waltz65  
NUC2 1H  
DCPD2 80.00 usec  
PL2 0.30 dB  
PL12 15.40 dB  
PL13 18.40 dB  
PL2W 11.25229836 W  
PL12W 0.34772930 W  
PL13W 0.17427748 W  
SFO2 400.1316005 MHz  
SI 32768  
SF 100.6127690 MHz  
WDW EM  
SSB 0  
LB 1.00 Hz  
GB 0  
PC 1.40

HRMS

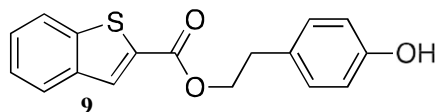

Fragmentor Voltage 100 Collision Energy 0 Ionization Mode Esi

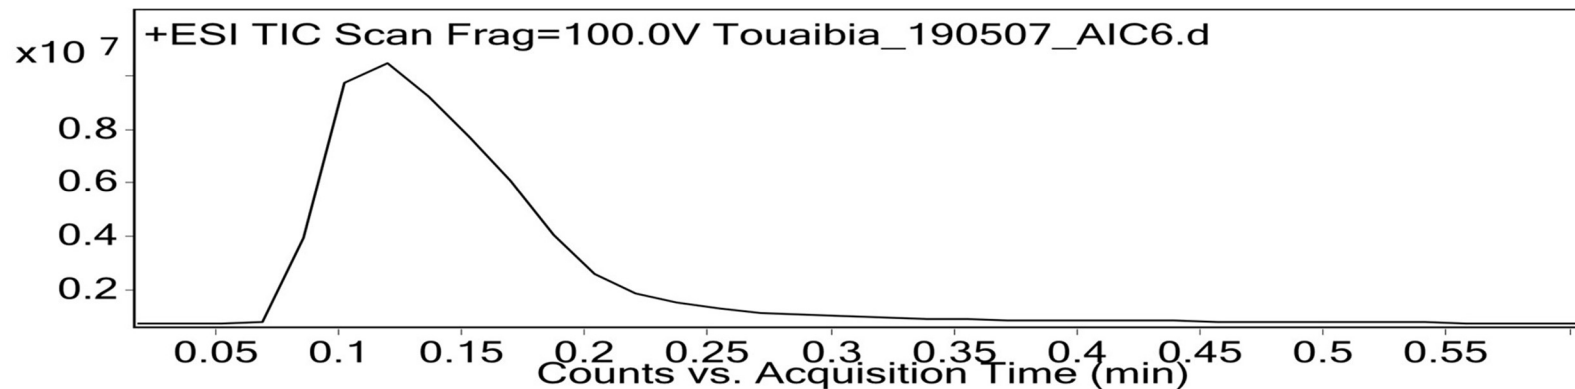

### User Spectra

Fragmentor Voltage 100 Collision Energy 0 Ionization Mode Esi

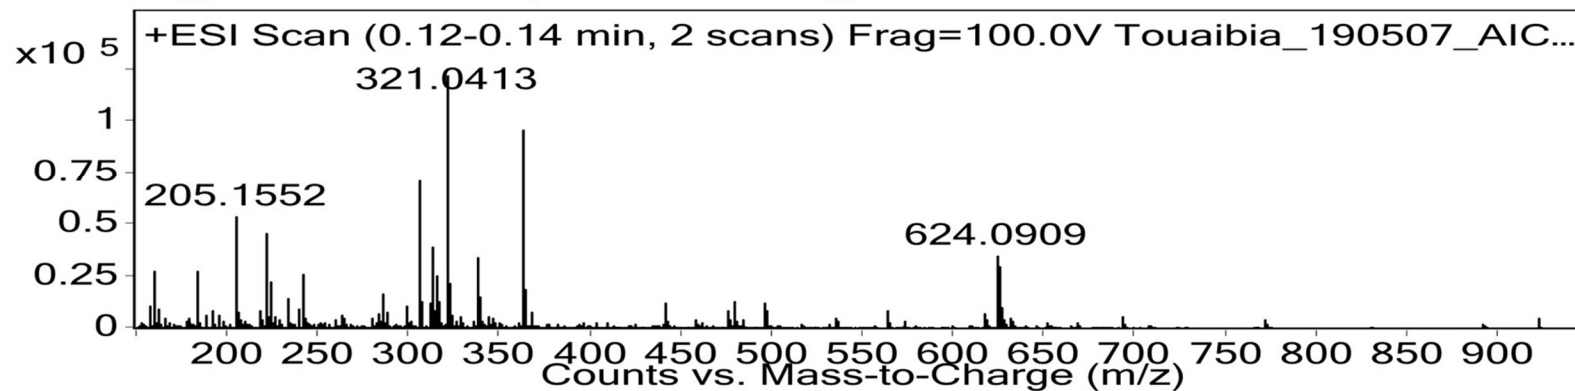

### Peak List

<sup>1</sup>H NMR

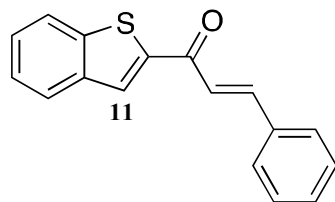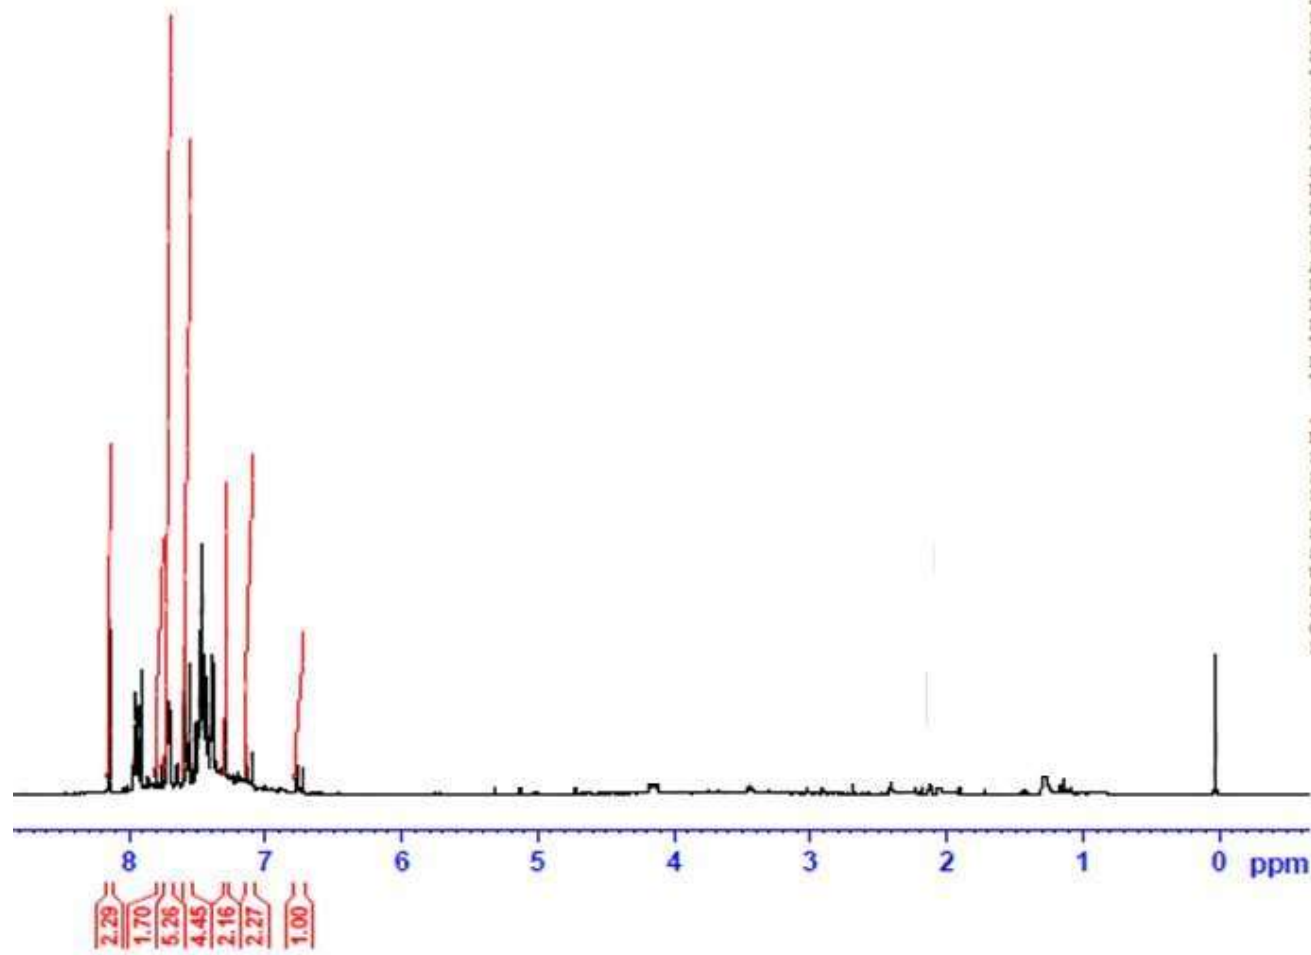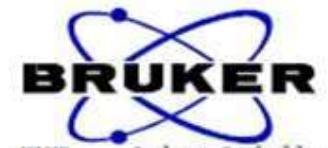

```
NAME Audrey Isabelle
EXPNO 47
PROCNO 1
Date_ 20190530
Time 14.26
INSTRUM spect
PROBHD 5 mm DABBO BB-
PULPROG zg30
TD 65536
SOLVENT CDCl3
NS 16
DS 2
SWH 8223.685 Hz
FIDRES 0.125483 Hz
AQ 3.9846387 sec
RG 64
DW 60.800 usec
DE 6.50 usec
TE 298.0 K
D1 1.00000000 sec
TDO 1
```

```
----- CHANNEL f1 -----
NUC1 1H
P1 14.07 usec
PL1 0.30 dB
PL1W 11.25229836 W
SFO1 400.1324710 MHz
SI 32768
SF 400.1300000 MHz
WDW EM
SSB 0
LB 0.30 Hz
GB 0
PC 1.00
```

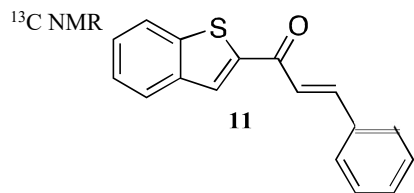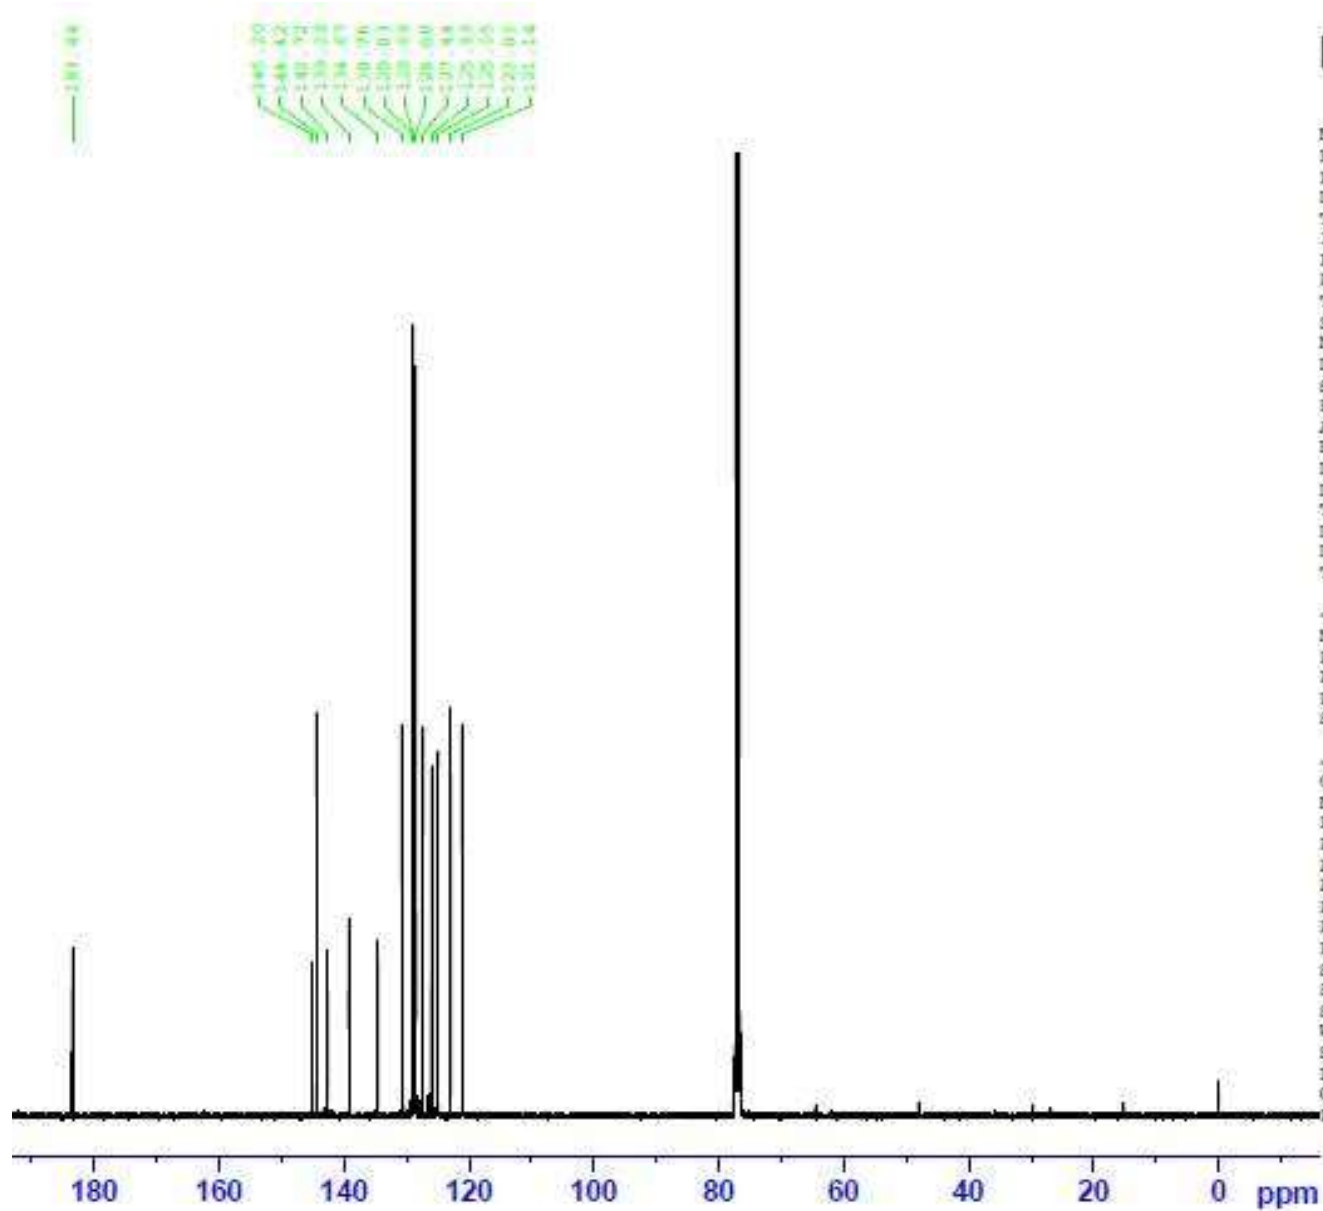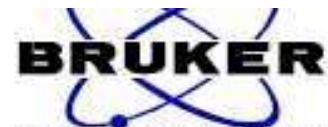

```

NAME      Audrey Isabelle
EXPNO     52
PROCNO    1
Date_     20190603
Time      23.37
INSTRUM   spect
PROBHD    5 mm DABBO BH-
PULPROG   zgpg30
TD        65536
SOLVENT   CDCl3
NS        10000
DS        4
SWH       24038.461 Hz
FIDRES    0.366798 Hz
AQ        1.3631988 sec
RG        203
DW        20.800 usec
DE        6.50 usec
TE        298.0 K
D1        2.00000000 sec
D11       0.03000000 sec
TD0       1
  
```

```

----- CHANNEL f1 -----
NUC1      13C
P1        9.90 usec
PL1       -1.90 dB
PL1W      56.02249908 W
SFO1      100.6228298 MHz
  
```

```

----- CHANNEL f2 -----
CPDPRG2   waltz65
NUC2      1H
PCPD2     80.00 usec
PL2        0.30 dB
PL12       15.40 dB
PL13       18.40 dB
PL2W      11.25229836 W
PL12W     0.34772930 W
PL13W     0.17427748 W
SFO2      400.1316005 MHz
SI        32768
SF        100.6127690 MHz
WDW       EM
SSB       0
LB        1.00 Hz
GB        0
PC        1.40
  
```

HRMS

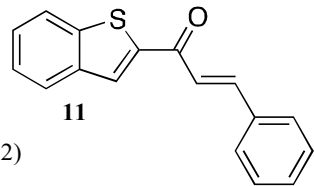

AIC 15(2)

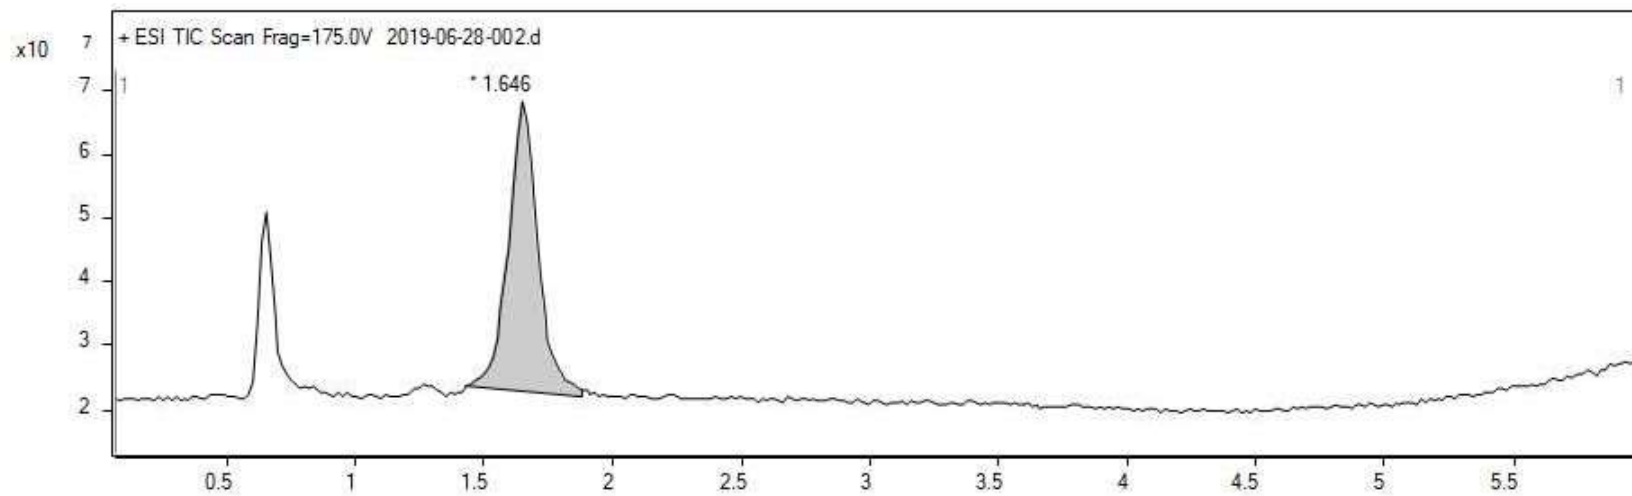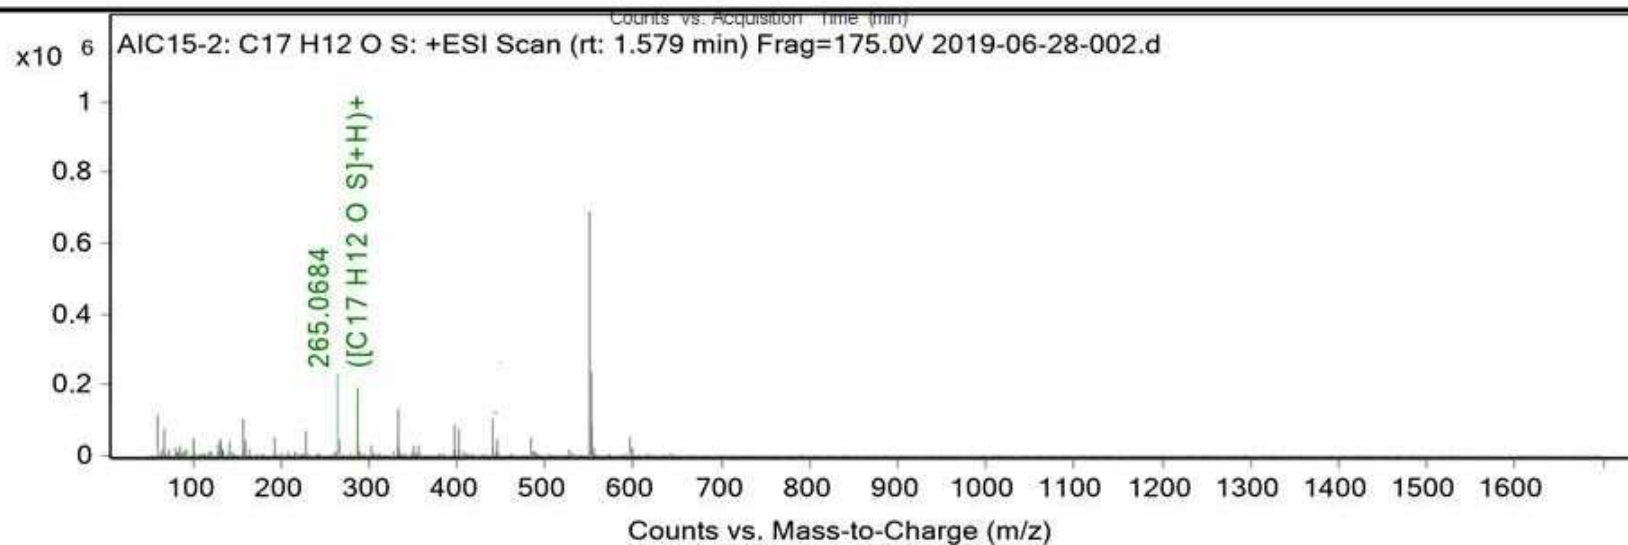

<sup>1</sup>H NMR

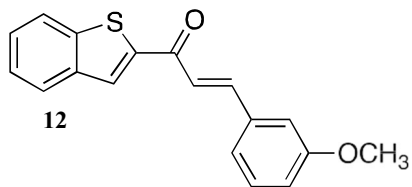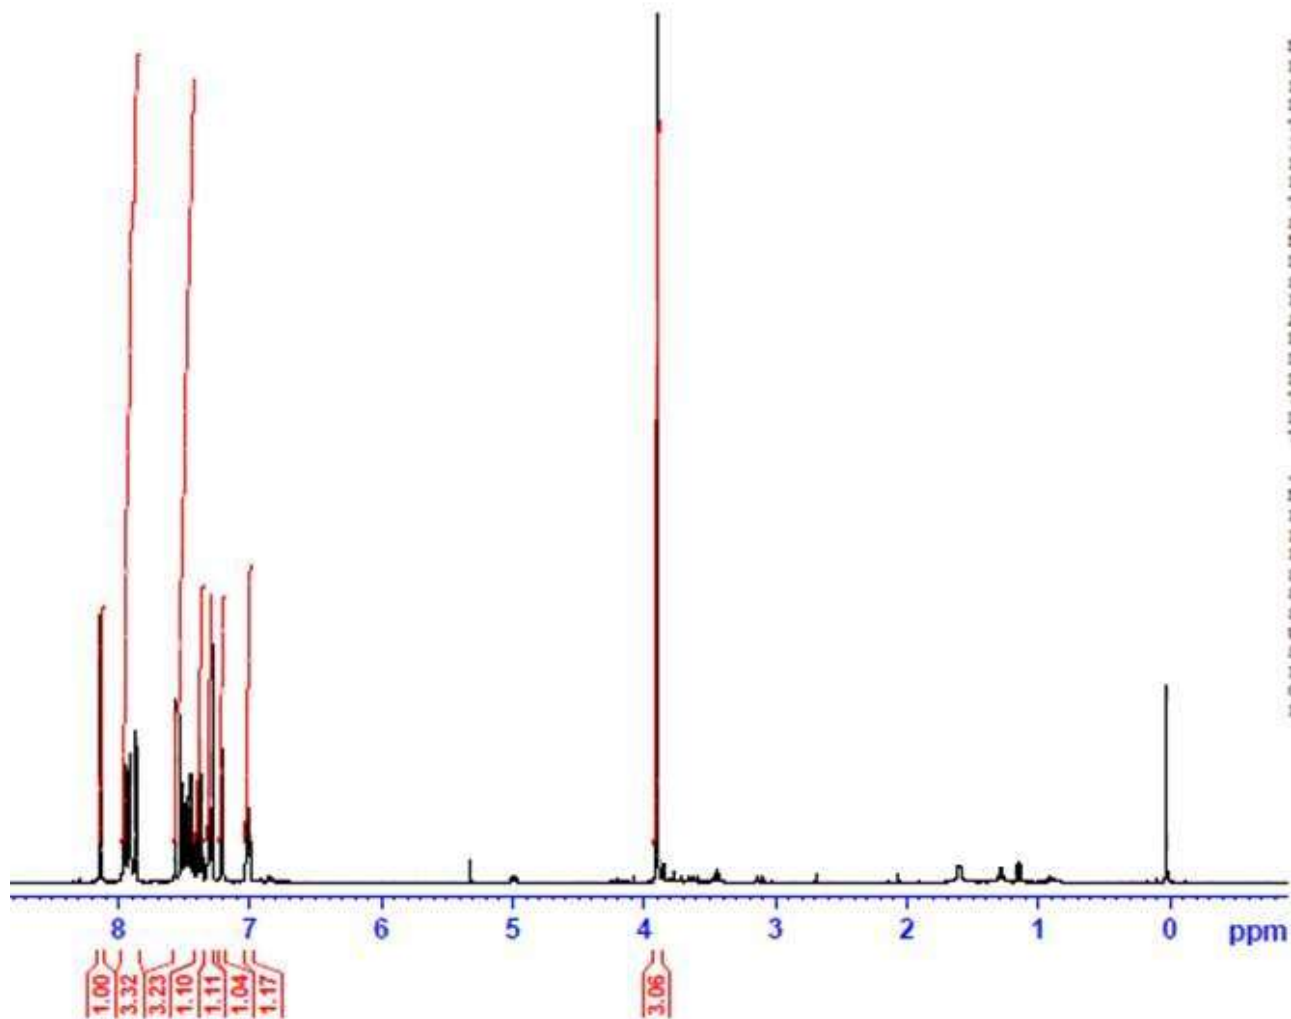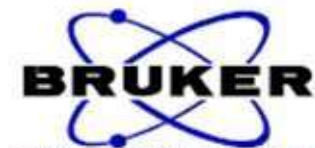

NAME Audrey Isabelle  
EXPNO 54  
PROCNO 1  
Date\_ 20190604  
Time\_ 16.24  
INSTRUM spect  
PROBHD 5 mm DABBO BB-  
PULPROG zg30  
TD 65536  
SOLVENT CDCl3  
NS 16  
DS 2  
SWH 8223.685 Hz  
FIDRES 0.125483 Hz  
AQ 3.9846387 sec  
RG 114  
DW 60.800 usec  
DE 6.50 usec  
TE 298.0 K  
D1 1.00000000 sec  
TDO 1

----- CHANNEL f1 -----  
NUC1 1H  
P1 14.07 usec  
PL1 0.30 dB  
PL1W 11.25229836 W  
SFO1 400.1324710 MHz  
SI 32768  
SF 400.1300000 MHz  
WDW EM  
SSB 0  
LB 0.30 Hz  
GB 0  
PC 1.00

<sup>13</sup>C NMR

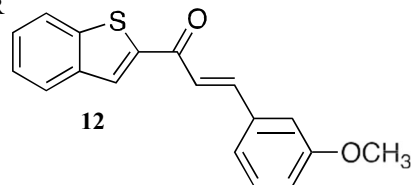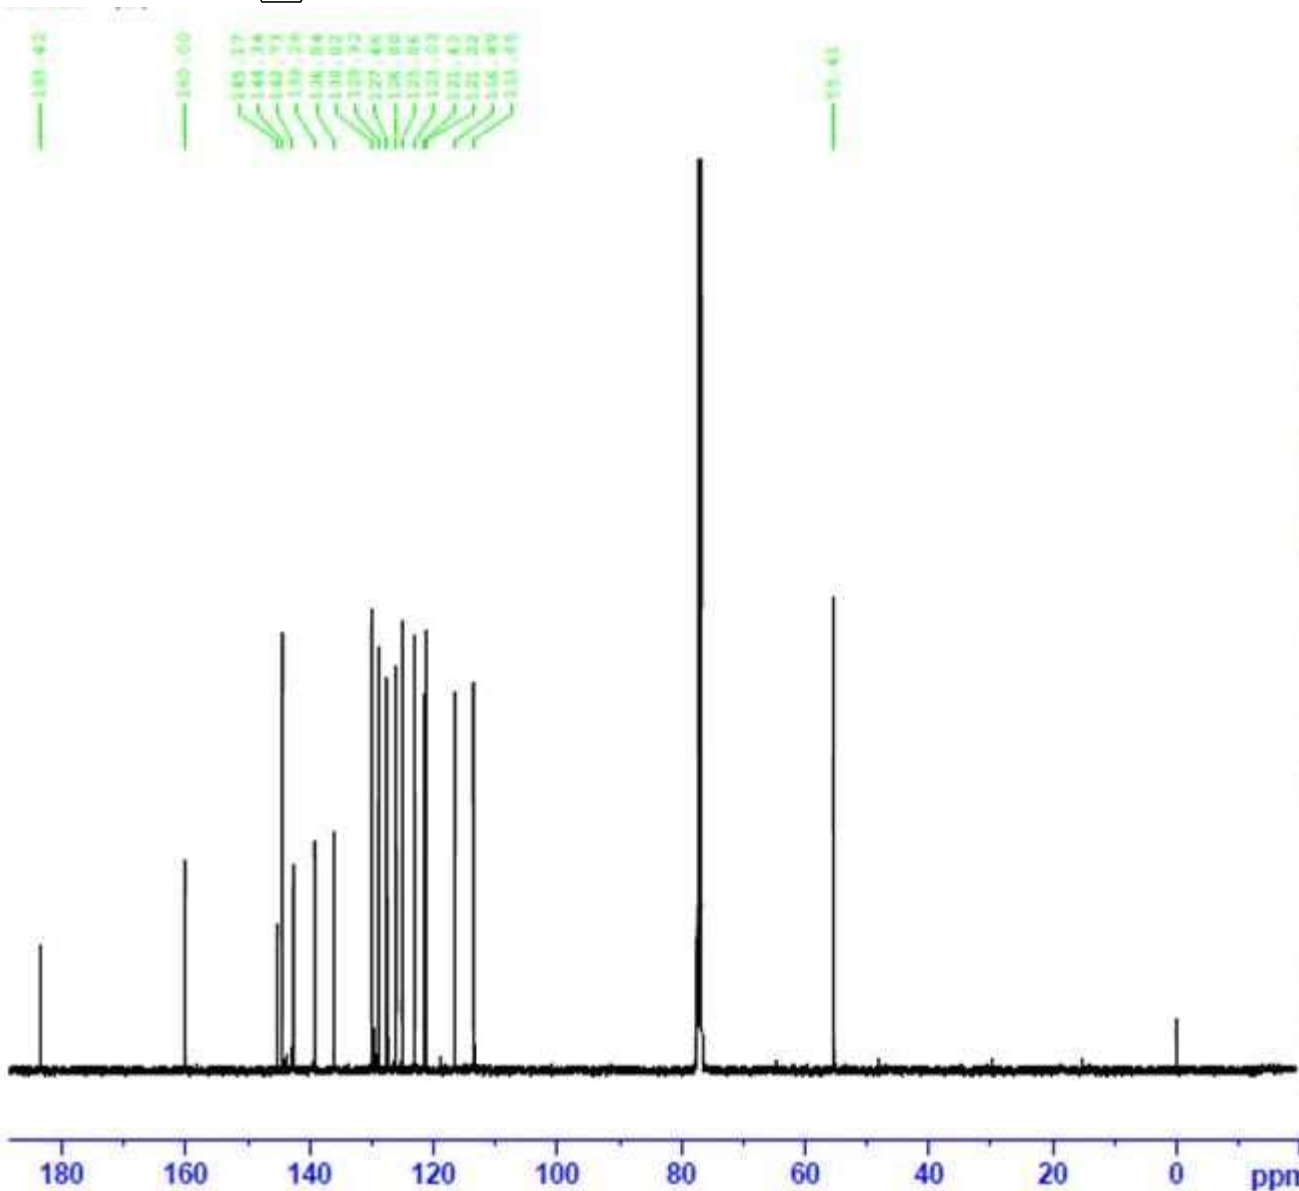

NAME Audrey Isabelle  
EXFNO 56  
PROCNO 1  
Date\_ 20190605  
Time\_ 3.08  
INSTRUM spect  
PROBHD 5 mm DABBO BB-  
PULPROG zgpg30  
TD 65536  
SOLVENT CDCl3  
NS 10000  
DS 4  
SWH 24038.461 Hz  
FIDRES 0.366798 Hz  
AQ 1.3621988 sec  
RG 203  
CW 20.800 usec  
DE 6.50 usec  
TE 298.0 K  
D1 2.00000000 sec  
D11 0.03000000 sec  
TDO 1

----- CHANNEL f1 -----  
NUC1 13C  
P1 9.90 usec  
PL1 -1.90 dB  
PL1W 56.02249908 W  
SFO1 100.6228298 MHz

----- CHANNEL f2 -----  
CPDPRG2 waltz65  
NUC2 1H  
PCPD2 80.00 usec  
PL2 0.30 dB  
PL12 15.40 dB  
PL13 18.40 dB  
PL2W 11.25229836 W  
PL13W 0.34772930 W  
PL13W 0.17427748 W  
SFO2 400.1316005 MHz  
SI 32768  
SF 100.6127690 MHz  
WDW RM  
SFB 0  
LB 1.00 Hz  
GB 0  
PC 1.40



HRMS

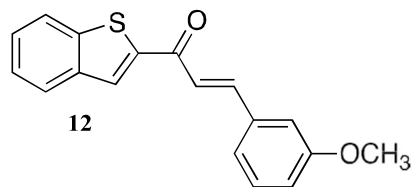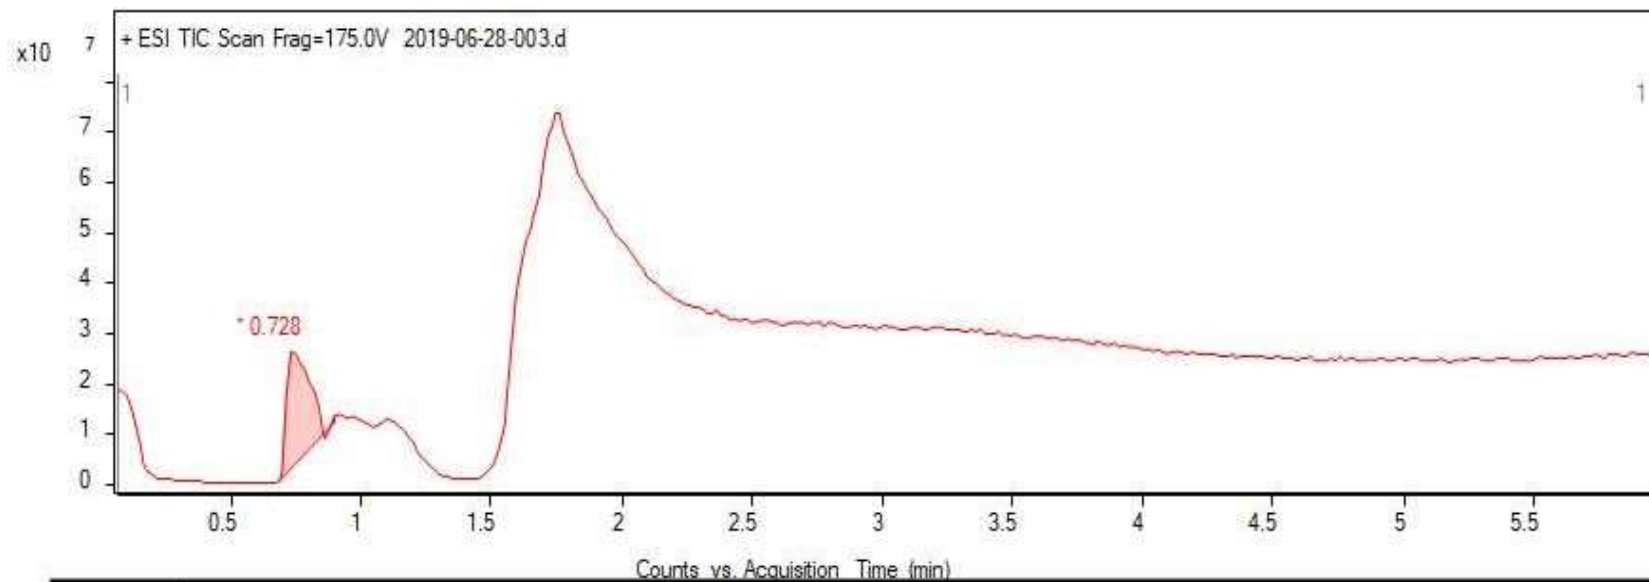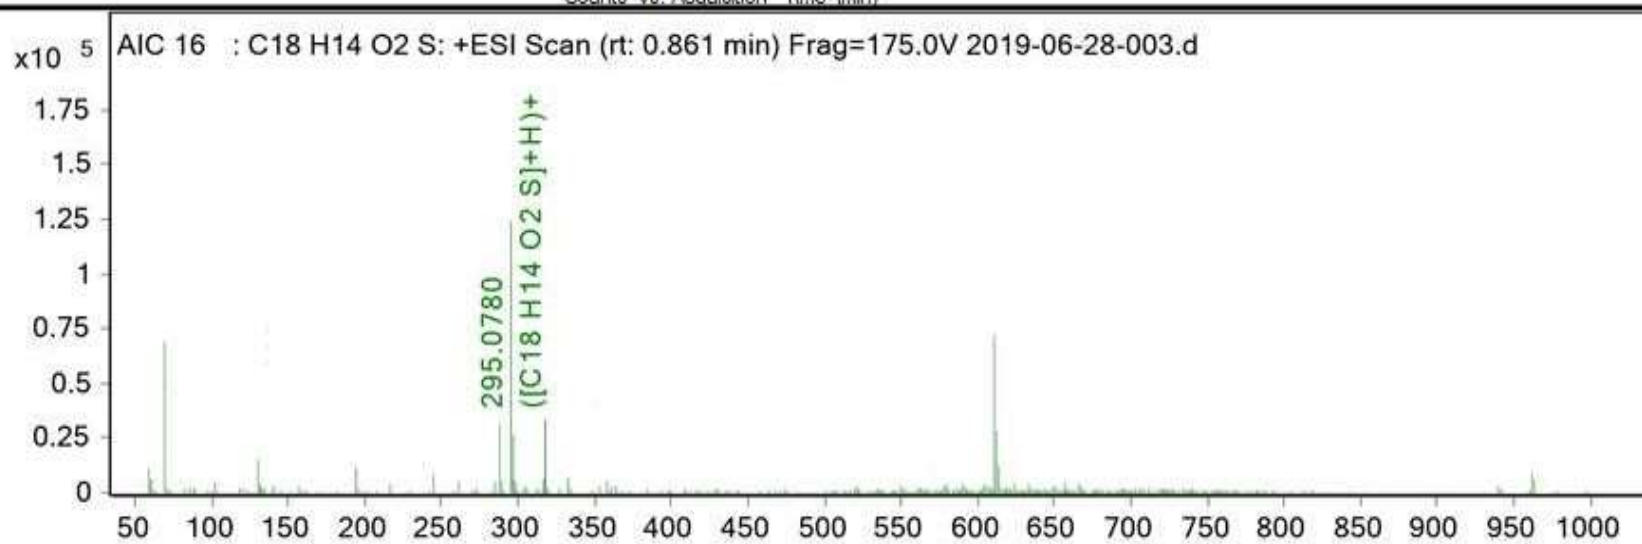

<sup>1</sup>H NMR

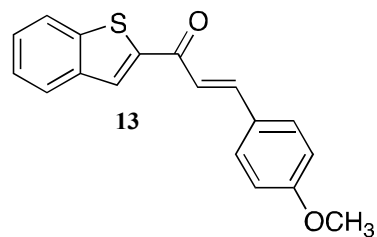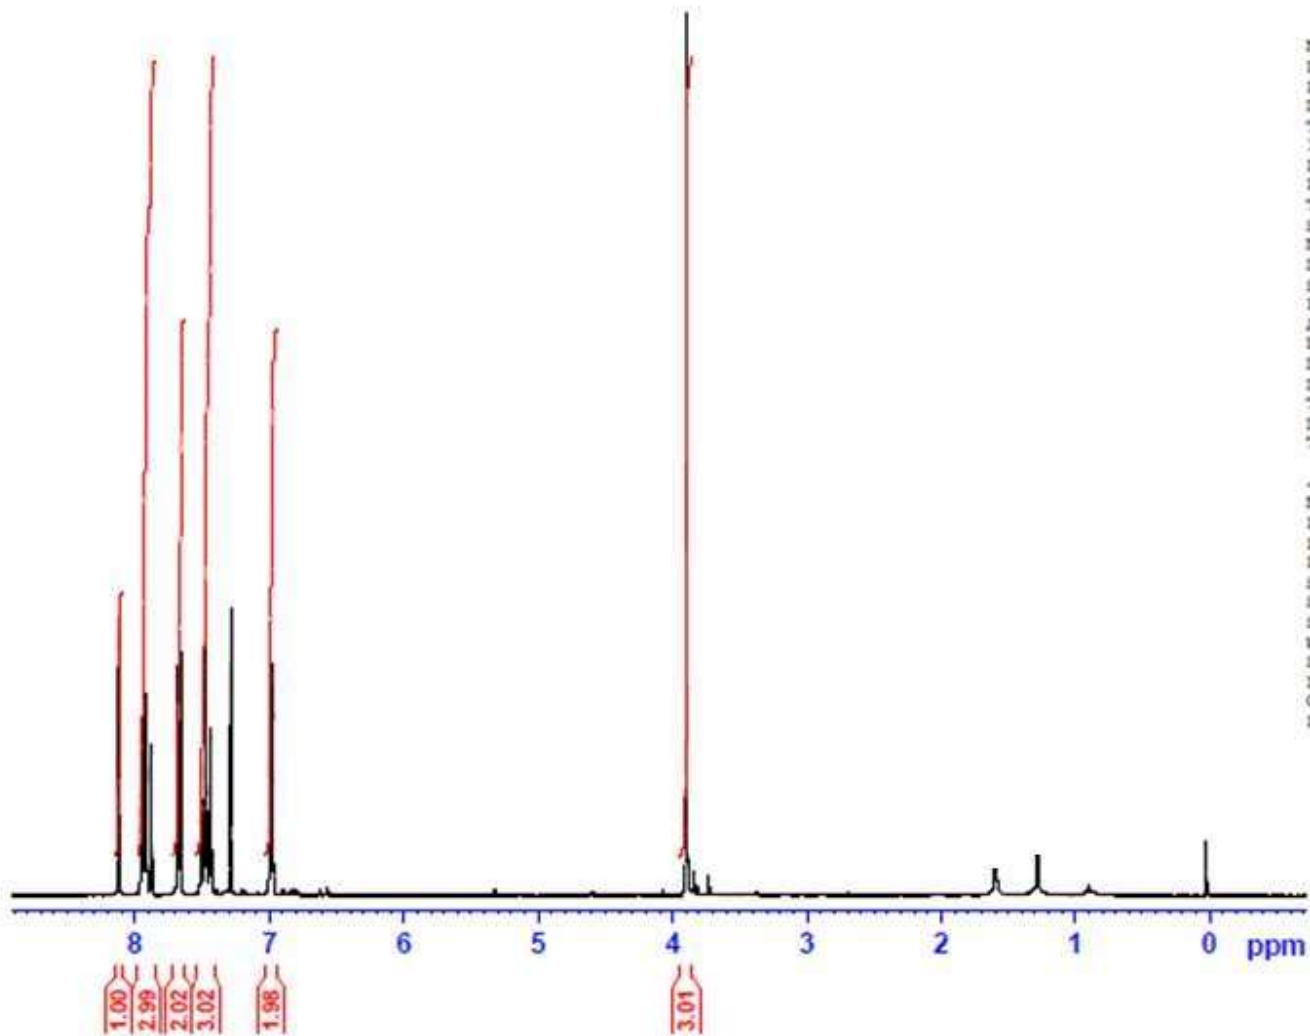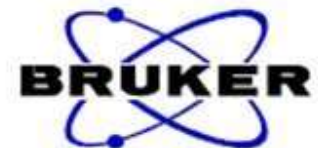

```
NAME      Audrey Isabelle
EXPNO     30
PROCNO    1
Date_     20190521
Time      13.19
INSTRUM   spect
PROBHD    5 mm DABBO RB-
PULPROG   zg30
TD        65536
SOLVENT   CDCl3
NS        16
DS        2
SWH       8223.685 Hz
FIDRES    0.125483 Hz
AQ        3.9846387 sec
RG        128
DW        60.800 usec
DE        6.50 usec
TE        298.0 K
D1        1.000000000 sec
TD0       1
```

```
----- CHANNEL F1 -----
NUC1      1H
P1        14.07 usec
PL1       0.30 dB
PL1W      11.25229836 W
SFO1      400.1324710 MHz
SI        32768
SF        400.1300000 MHz
WOW       RM
SSB       0
LB        0.30 Hz
GB        0
PC        1.00
```



HRMS

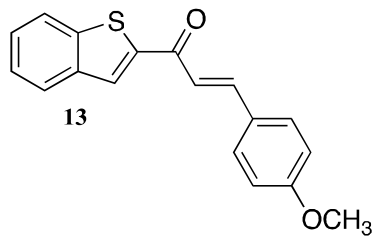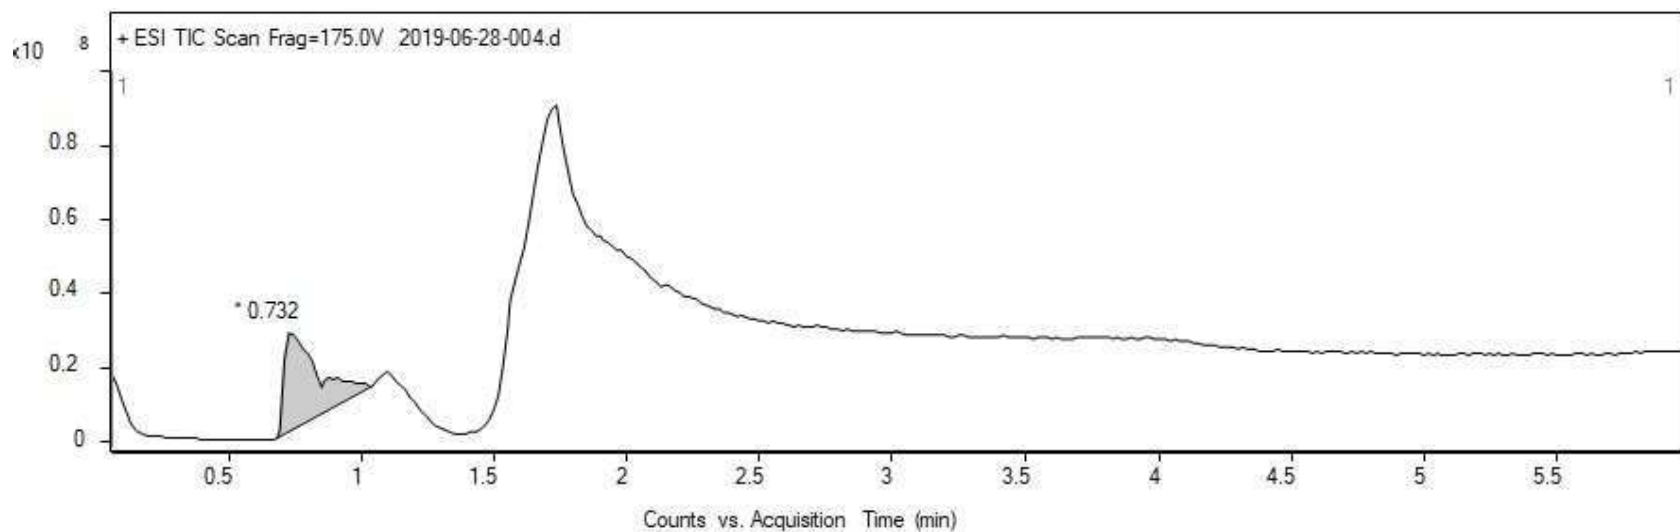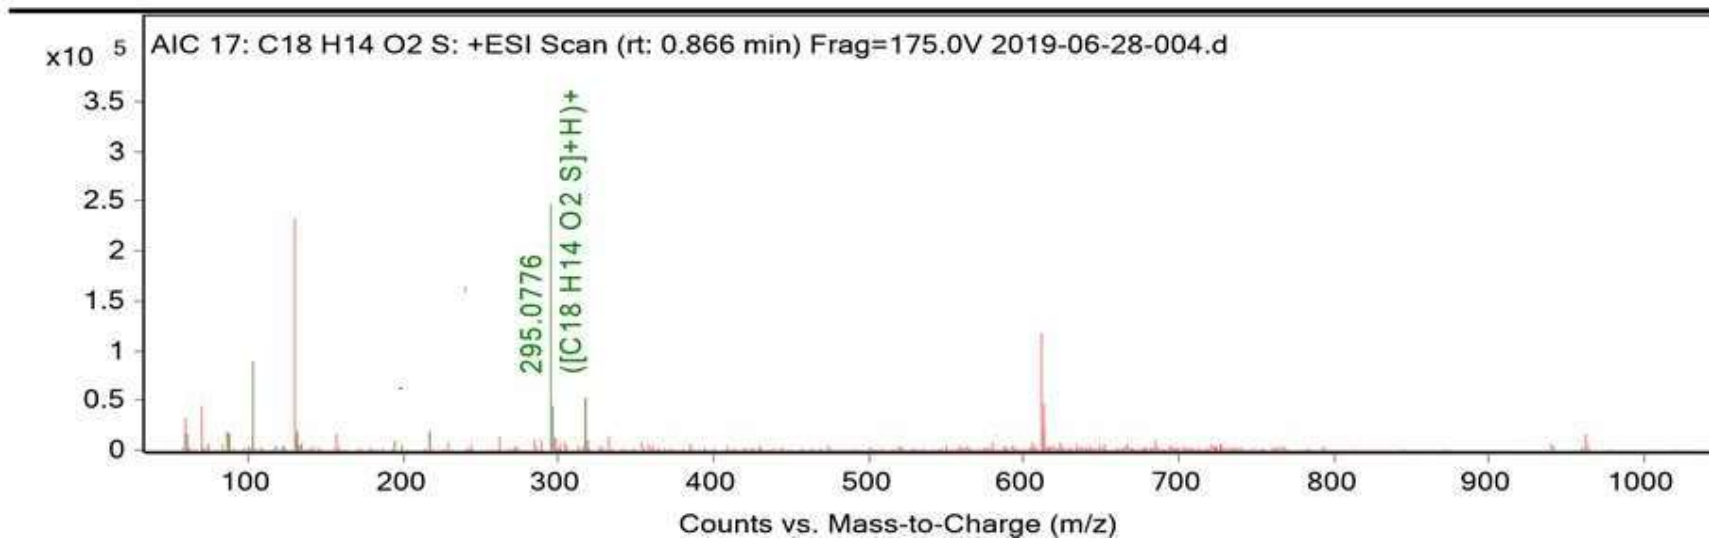

<sup>1</sup>H NMR

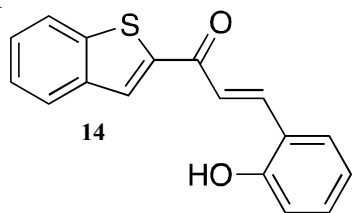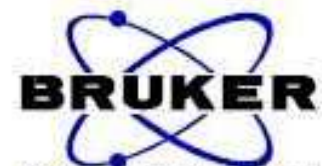

NAME Audrey Isabelle  
EXDNO 68  
PROCNO 1  
Date 20190614  
Time 10.50  
INSTRUM spect  
PROBHD 5 mm PABBO BB-  
PULPROG zg30  
TD 65536  
SOLVENT DMSO  
NS 16  
DS 2  
SWH 8223.685 Hz  
FIDRES 0.125483 Hz  
AQ 3.9846387 sec  
RG 128  
DW 60.800 usec  
DE 6.50 usec  
TE 298.0 K  
D1 1.00000000 sec  
TD0 1

----- CHANNEL F1 -----  
NUC1 <sup>1</sup>H  
P1 14.07 usec  
PL1 0.10 dB  
PL1W 11.25229836 W  
SFO1 400.1324710 MHz  
SI 32768  
SF 400.1300000 MHz  
WDW EM  
SSB 0  
LB 0.30 Hz  
CB 0  
PC 1.00

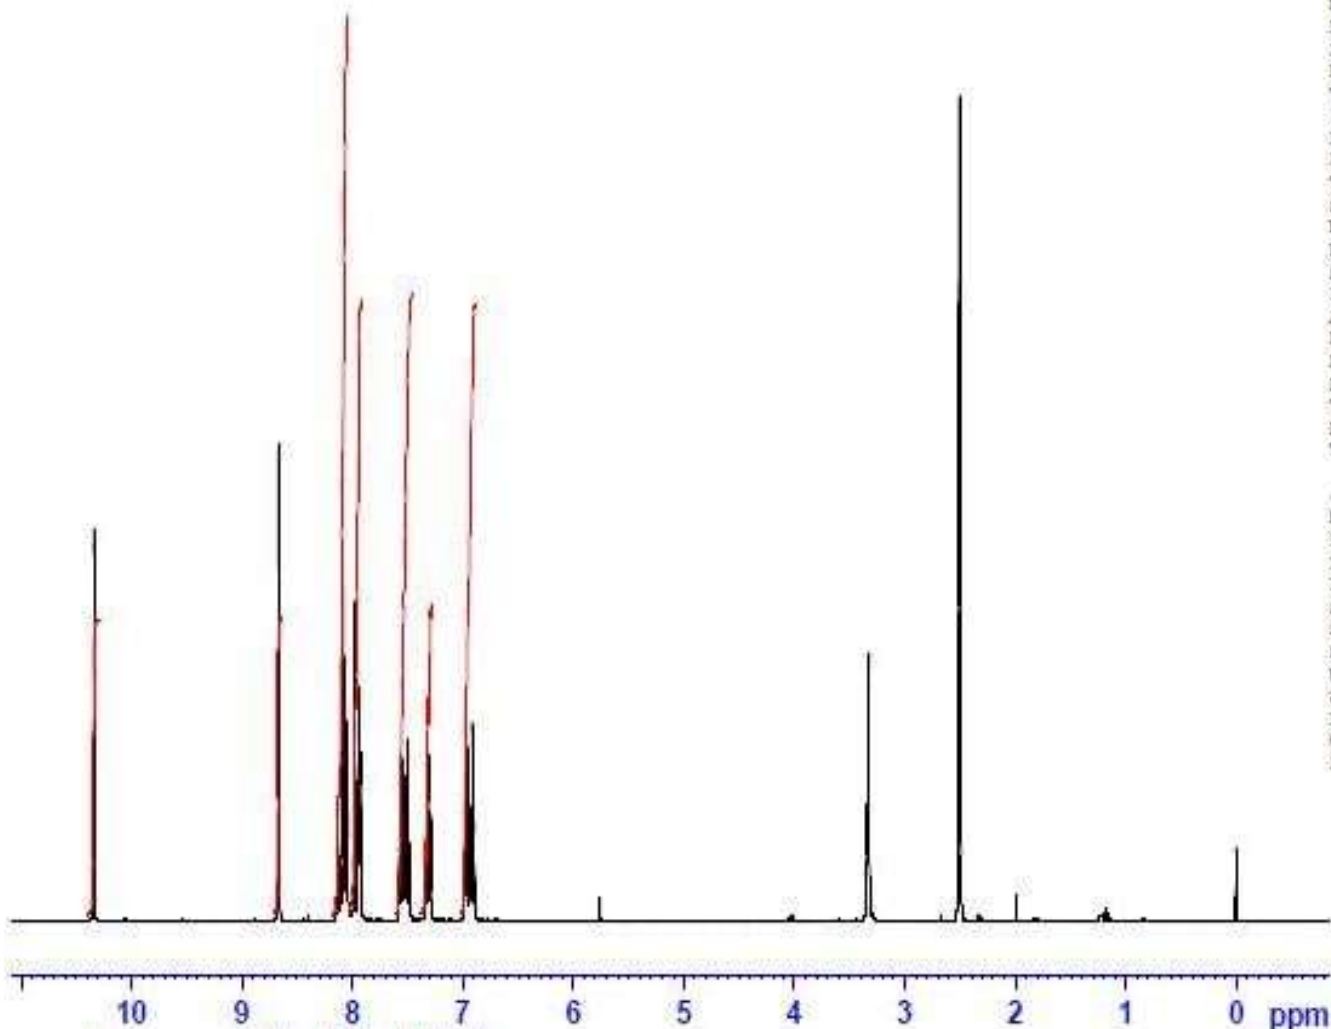

0.99  
1.00  
3.04  
2.08  
2.09  
1.05  
2.06

<sup>13</sup>C NMR

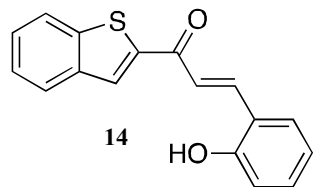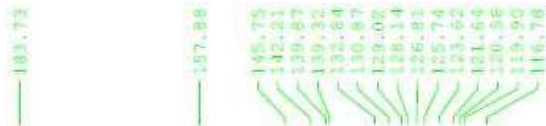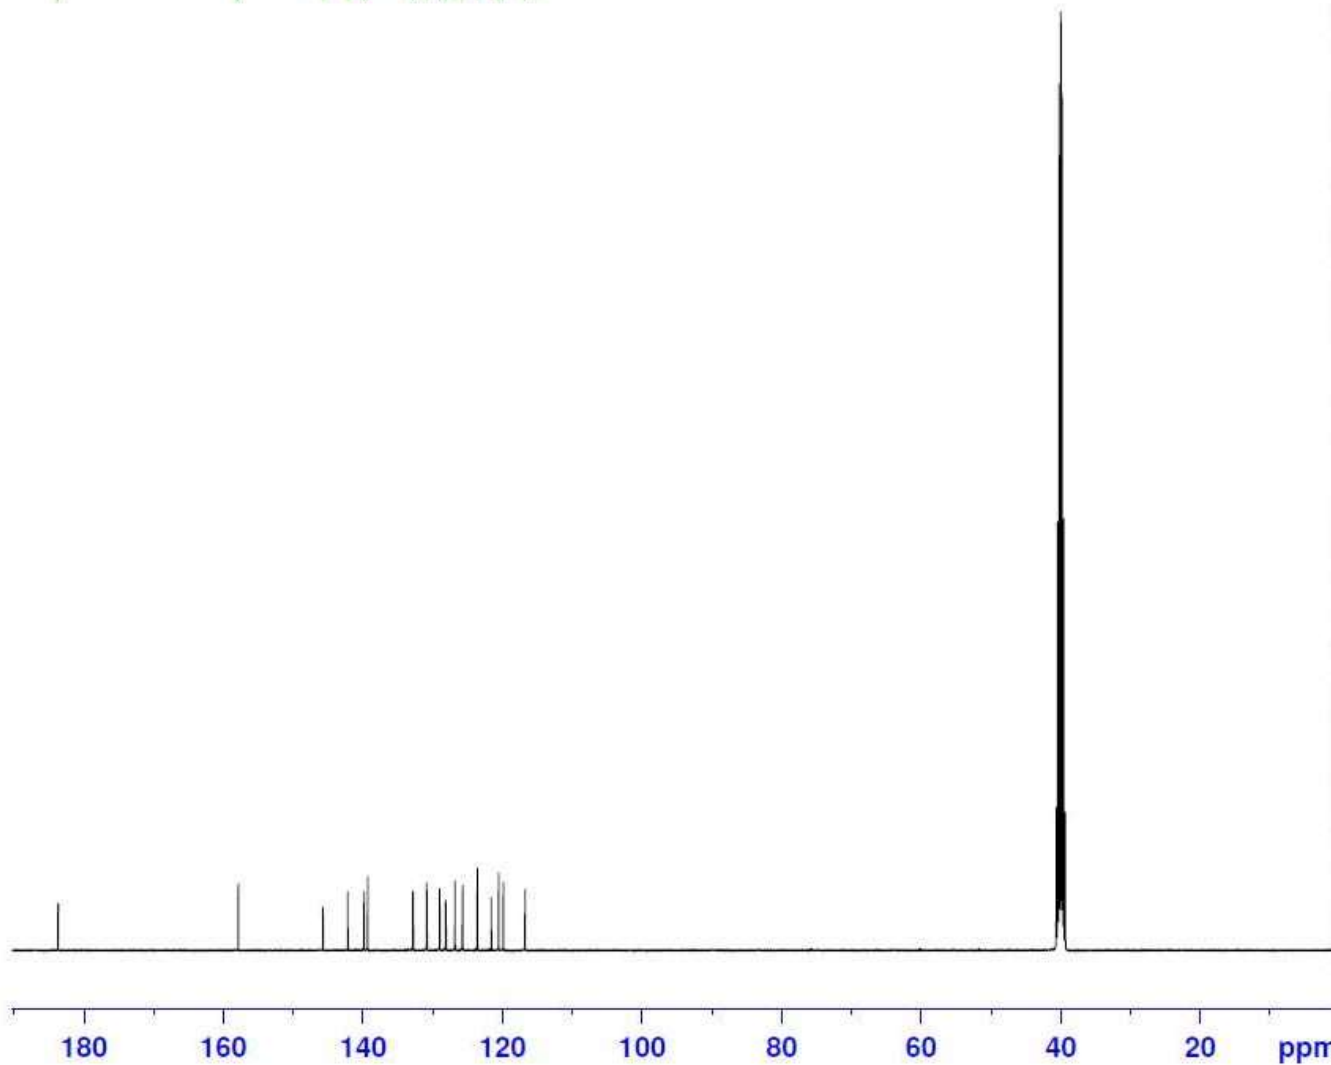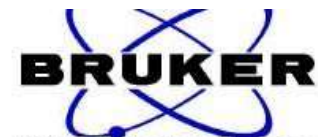

NAME Audrey Isabelle  
EXPNO 73  
PROCNO 1  
Date\_ 20190617  
Time 23.34  
INSTRUM spect  
PROBHD 5 mm PABBO BB-  
PULPROG zgpg30  
TD 65536  
SOLVENT DMSO  
NS 10000  
DS 4  
SWH 24038.461 Hz  
FIDRES 0.366798 Hz  
AQ 1.3631988 sec  
RG 203  
DW 20.800 usec  
DE 6.50 usec  
TE 298.0 K  
D1 2.00000000 sec  
D11 0.03000000 sec  
TD0 1

==== CHANNEL f1 =====  
NUC1 13C  
P1 9.90 usec  
PL1 -1.90 dB  
PL1W 56.02249908 W  
SFO1 100.6228298 MHz

==== CHANNEL f2 =====  
CPDPRG2 waltz65  
NUC2 1H  
PCPD2 80.00 usec  
PL2 0.30 dB  
PL12 15.40 dB  
PL13 18.40 dB  
PL2W 11.25229836 W  
PL12W 0.34772930 W  
PL13W 0.17427748 W  
SFO2 400.1316005 MHz  
SI 32768  
SF 100.6127690 MHz  
WDW EM  
SSB 0  
LB 1.00 Hz  
GB 0  
PC 1.40

HRMS

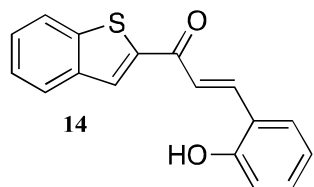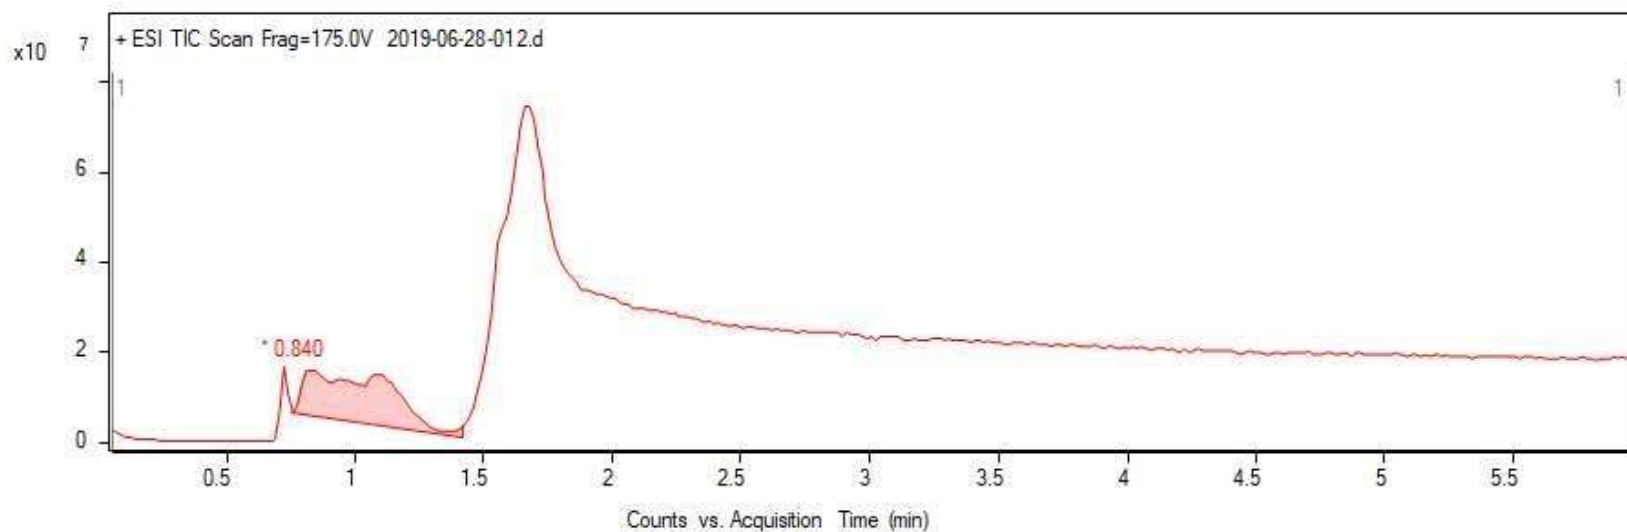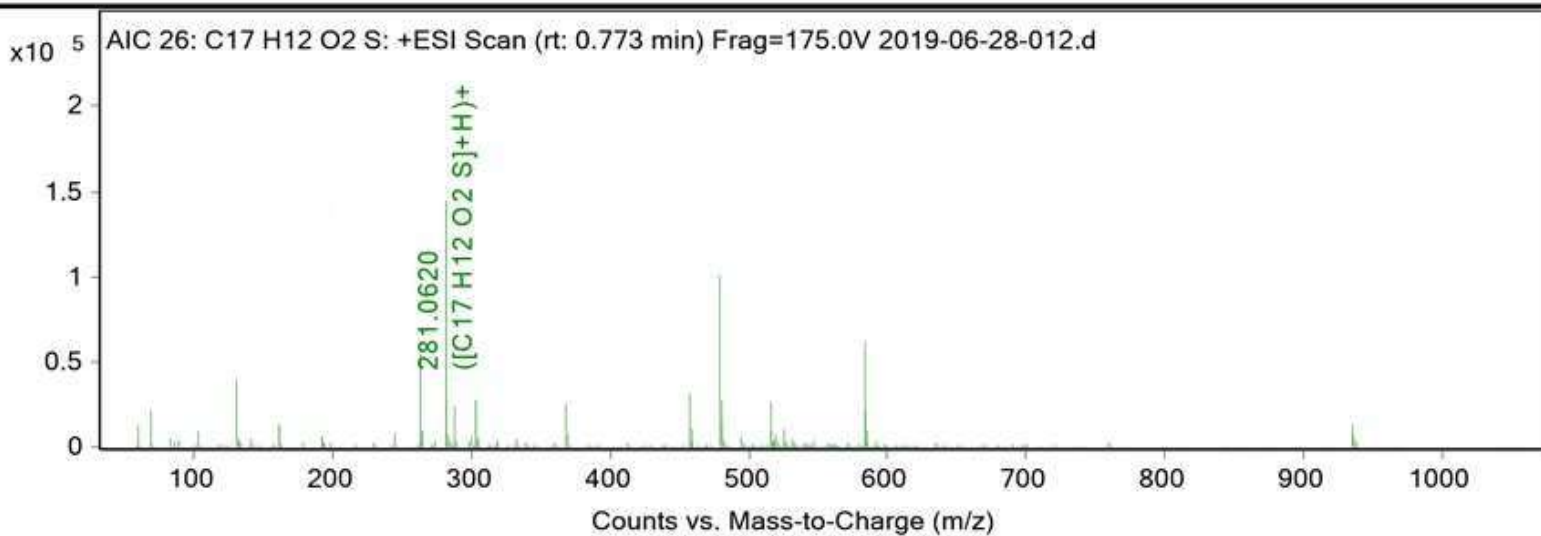



<sup>1</sup>H NMR

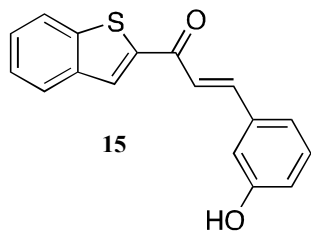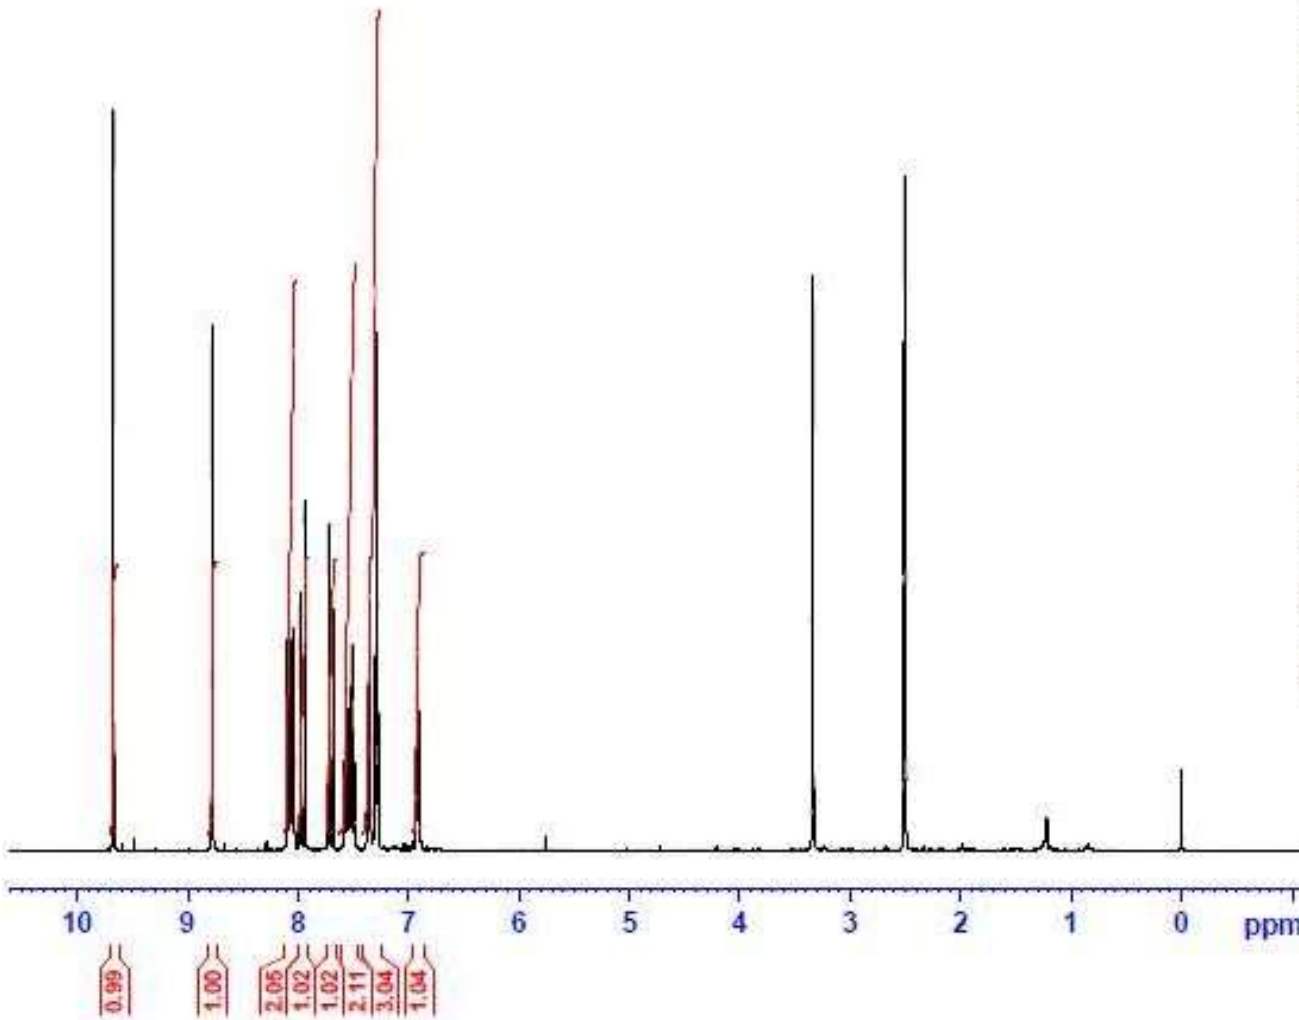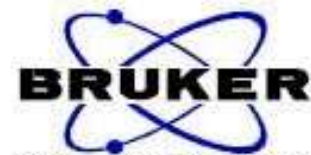

NAME Audrey Isabelle  
EXPNO 70  
PROCNO 1  
Date\_ 20190614  
Time 15.50  
INSTRUM spect  
PROBHD 5 mm DASSO BB-  
PULPROG zg30  
TD 65536  
SOLVENT DMSO  
NS 16  
DS 2  
SWM 8223.688 Hz  
FIDRES 0.125483 Hz  
AQ 3.9846387 sec  
RG 114  
DM 60.800 usec  
DE 6.50 usec  
TE 298.0 K  
D1 1.00000000 sec  
TD0 1

----- CHANNEL f1 -----  
NUC1 1H  
P1 14.07 usec  
PL1 0.30 dB  
PL1W 11.25229836 W  
SFO1 400.1324710 MHz  
SI 32768  
SF 400.1300000 MHz  
WDW EM  
SSE 0  
LB 0.30 Hz  
GB 0  
PC 1.00



<sup>13</sup>C NMR

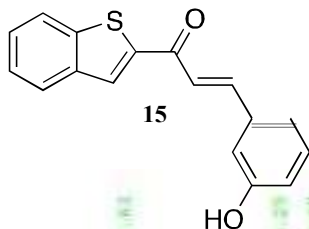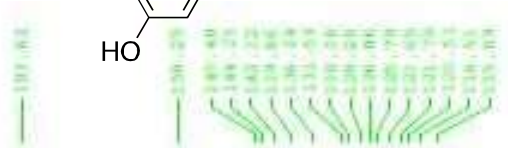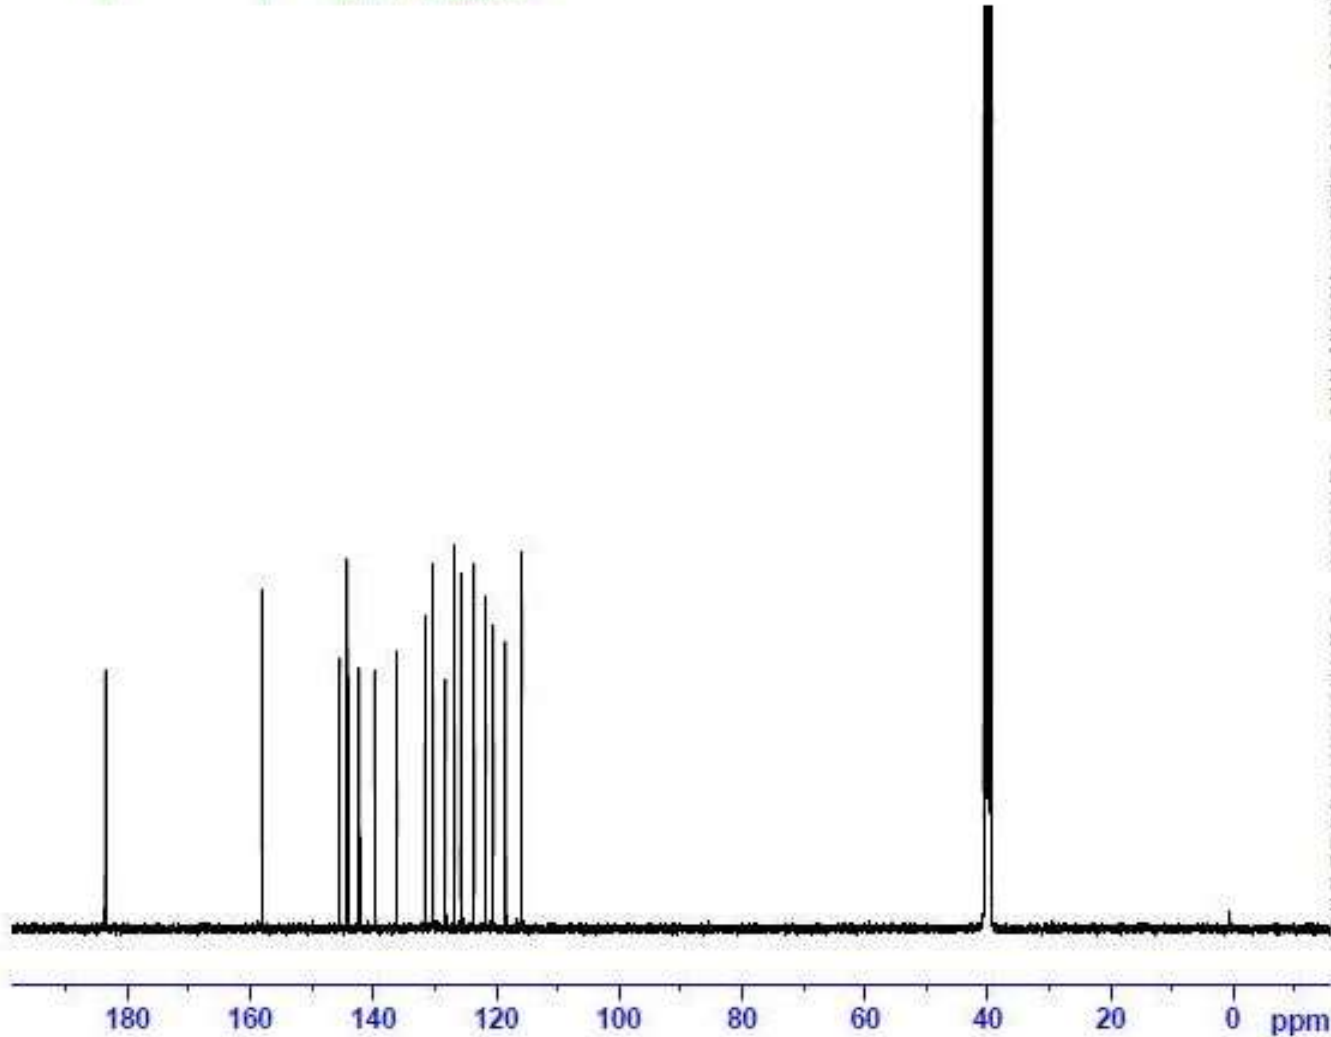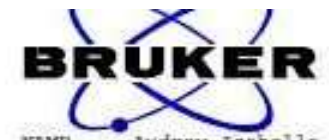

NAME Audrey Isabelle  
EXPNO 72  
PROCNO 1  
Date\_ 20190615  
Time 1.49  
INSTRUM spect  
PROBHD 5 mm PABBO BB-  
PULPROG zgpg30  
TD 65536  
SOLVENT DMSO  
NS 10000  
DS 4  
SWH 24038.461 Hz  
FIDRES 0.366798 Hz  
AQ 1.3631988 sec  
RG 203  
LW 20.800 usec  
DE 6.50 usec  
TE 298.0 K  
D1 2.00000000 sec  
D11 0.03000000 sec  
TD0 1

----- CHANNEL f1 -----  
NUC1 13C  
P1 9.90 usec  
PL1 -1.90 dB  
PL1W 56.02249908 W  
SFO1 100.6228298 MHz

----- CHANNEL f2 -----  
CPDPRG2 waltz65  
NUC2 1H  
PCPD2 80.00 usec  
PL2 0.30 dB  
PL12 15.40 dB  
PL13 18.40 dB  
PL2W 11.25229836 W  
PL12W 0.34772930 W  
PL13W 0.17427748 W  
SFO2 400.1316005 MHz  
SI 32768  
SF 100.6127690 MHz  
WDW EM  
SSB 0  
LB 1.00 KHz  
GB 0  
PC 1.40

HRMS

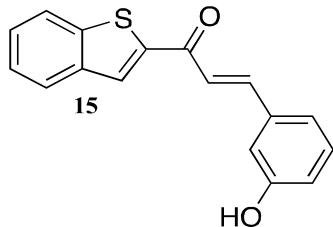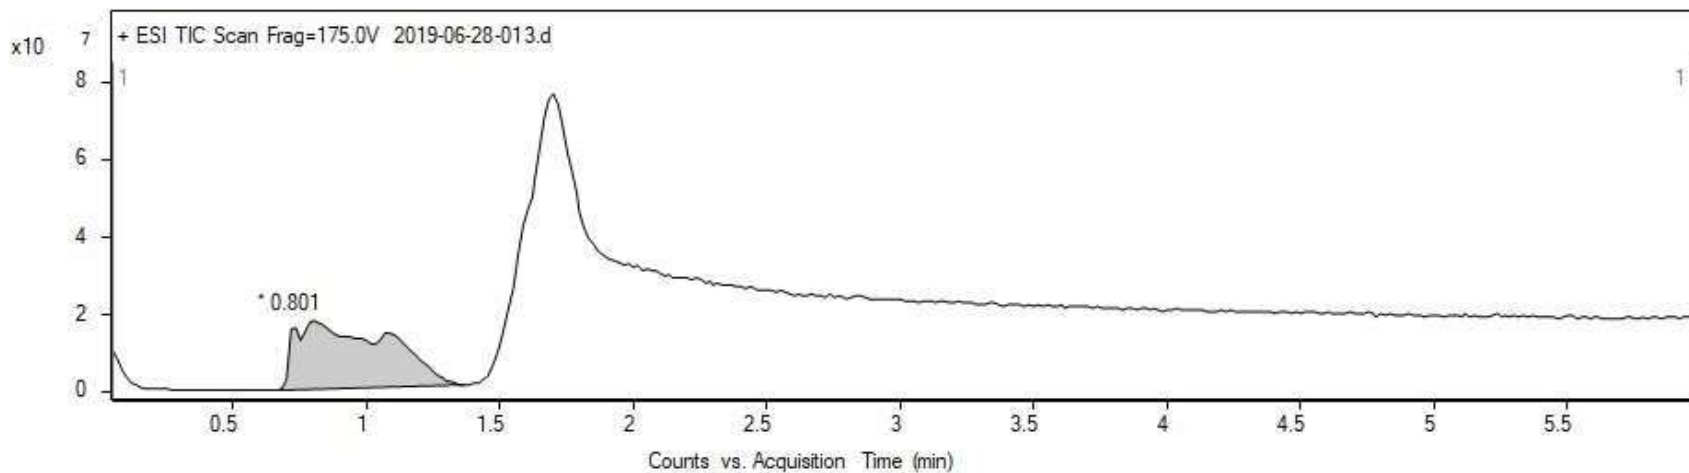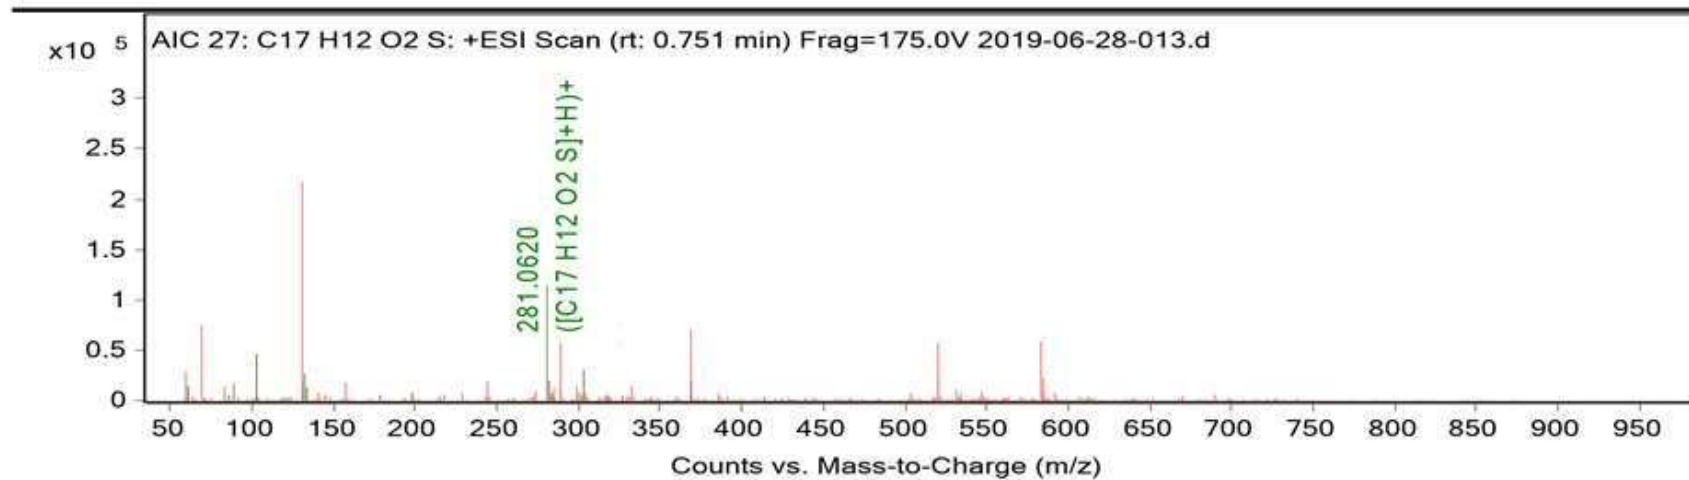

<sup>1</sup>H NMR

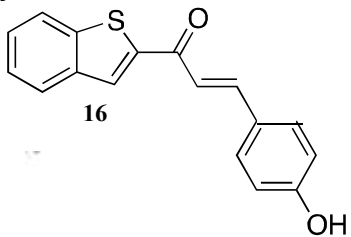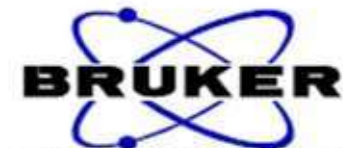

NAME Audrey Isabelle  
EXPNO 16  
PROCNO 1  
Date\_ 20190302  
Time 11.01  
INSTRUM spect  
PROBHD 5 mm PASPO BB-  
PULPROG zg30  
TD 65536  
SOLVENT CDCl3  
NS 16  
DS 2  
SWH 8223.685 Hz  
FIDRES 0.125483 Hz  
AQ 3.9846387 sec  
RG 203  
DW 60.800 usec  
DE 6.50 usec  
TE 298.0 K  
D1 1.00000000 sec  
TD0 1

----- CHANNEL f1 -----  
NUC1 1H  
P1 14.07 usec  
PL1 0.30 dB  
PL1W 11.25229836 W  
SFO1 400.1324710 MHz  
SI 32768  
SF 400.1300000 MHz  
WDW RM  
SEB 0  
LB 0.30 Hz  
GB 0  
PC 1.00

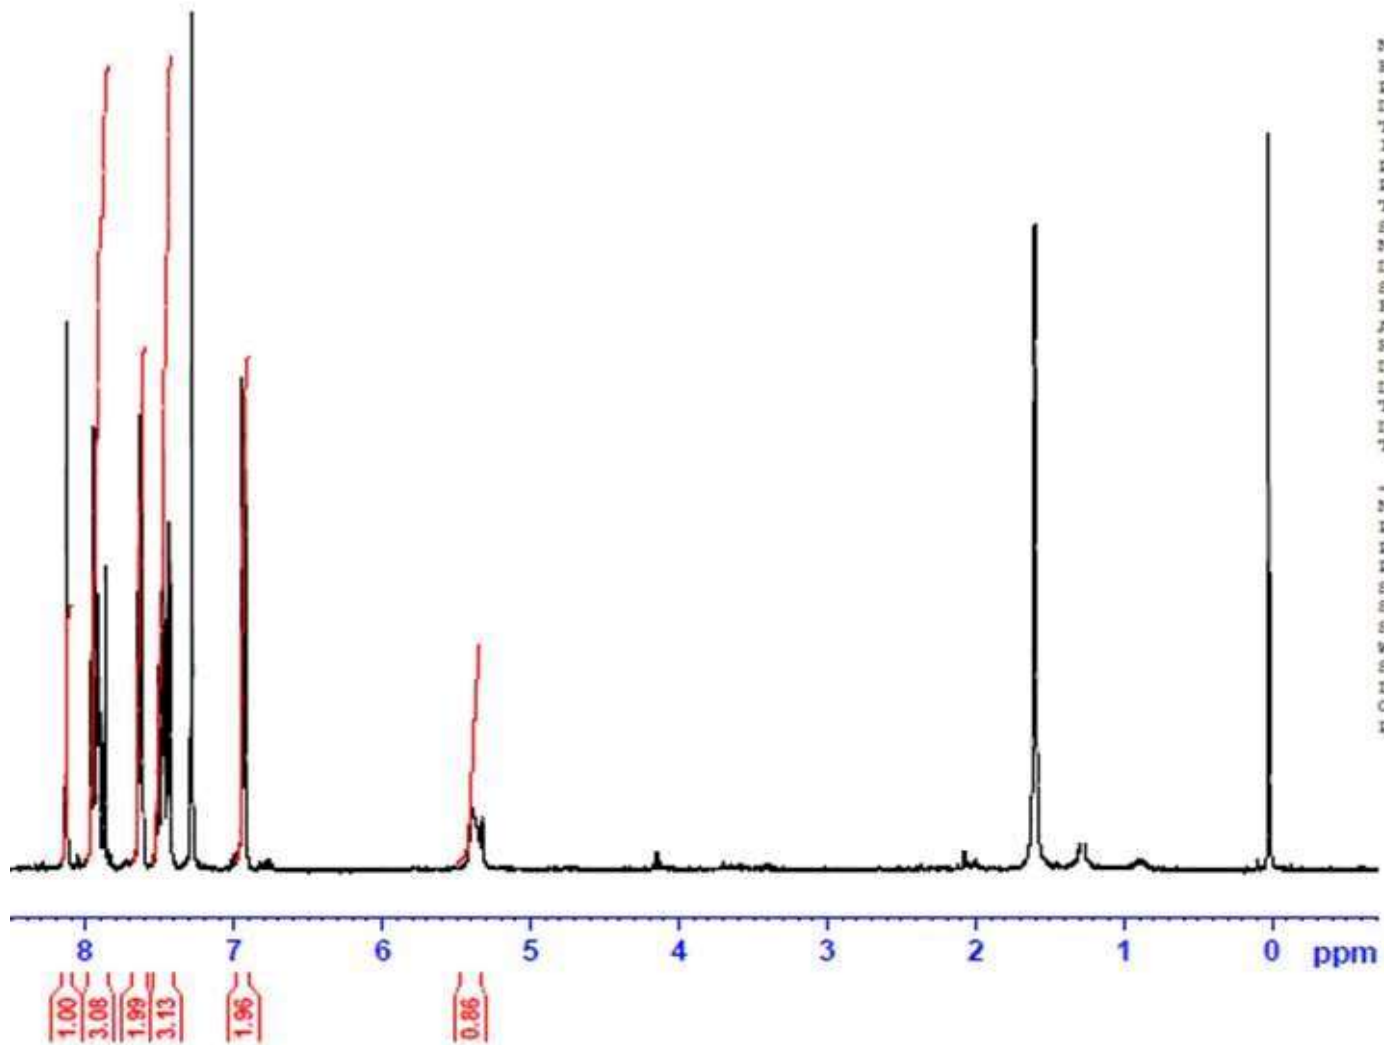

<sup>13</sup>C NMR

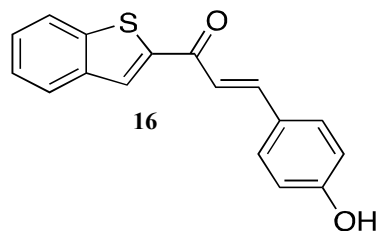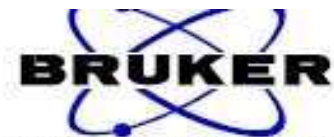

NAME Audrey Isabelle  
EXDNO 18  
PROCNO 1  
Date\_ 20190302  
Time\_ 22.40  
INSTRUM spect  
PROBHD 5 mm DABBO BB-  
PULPROG zgpg30  
TD 65536  
SOLVENT CDCl3  
NS 12000  
DS 4  
SWH 24038.461 Hz  
FIDRES 0.366798 Hz  
AQ 1.3631988 sec  
RG 203  
RW 20.800 usec  
DE 6.50 usec  
TE 298.0 K  
D1 2.00000000 sec  
D11 0.03000000 sec  
TDC 1

----- CHANNEL f1 -----  
NUC1 13C  
P1 5.90 usec  
PL1 -1.90 dB  
PL1W 56.02245908 W  
SFO1 100.6228298 MHz

----- CHANNEL f2 -----  
CDDPRG2 waltz65  
NUC2 1H  
PCPD2 80.00 usec  
PL2 0.30 dB  
PL12 15.40 dB  
PL13 18.40 dB  
PL2W 11.25229836 W  
PL12W 0.34772930 W  
PL13W 0.17427748 W  
SFO2 400.1316005 MHz  
SI 32768  
SF 100.6127690 MHz  
WDW EM  
SSB 0  
LB 1.00 Hz  
CB 0  
PC 1.40

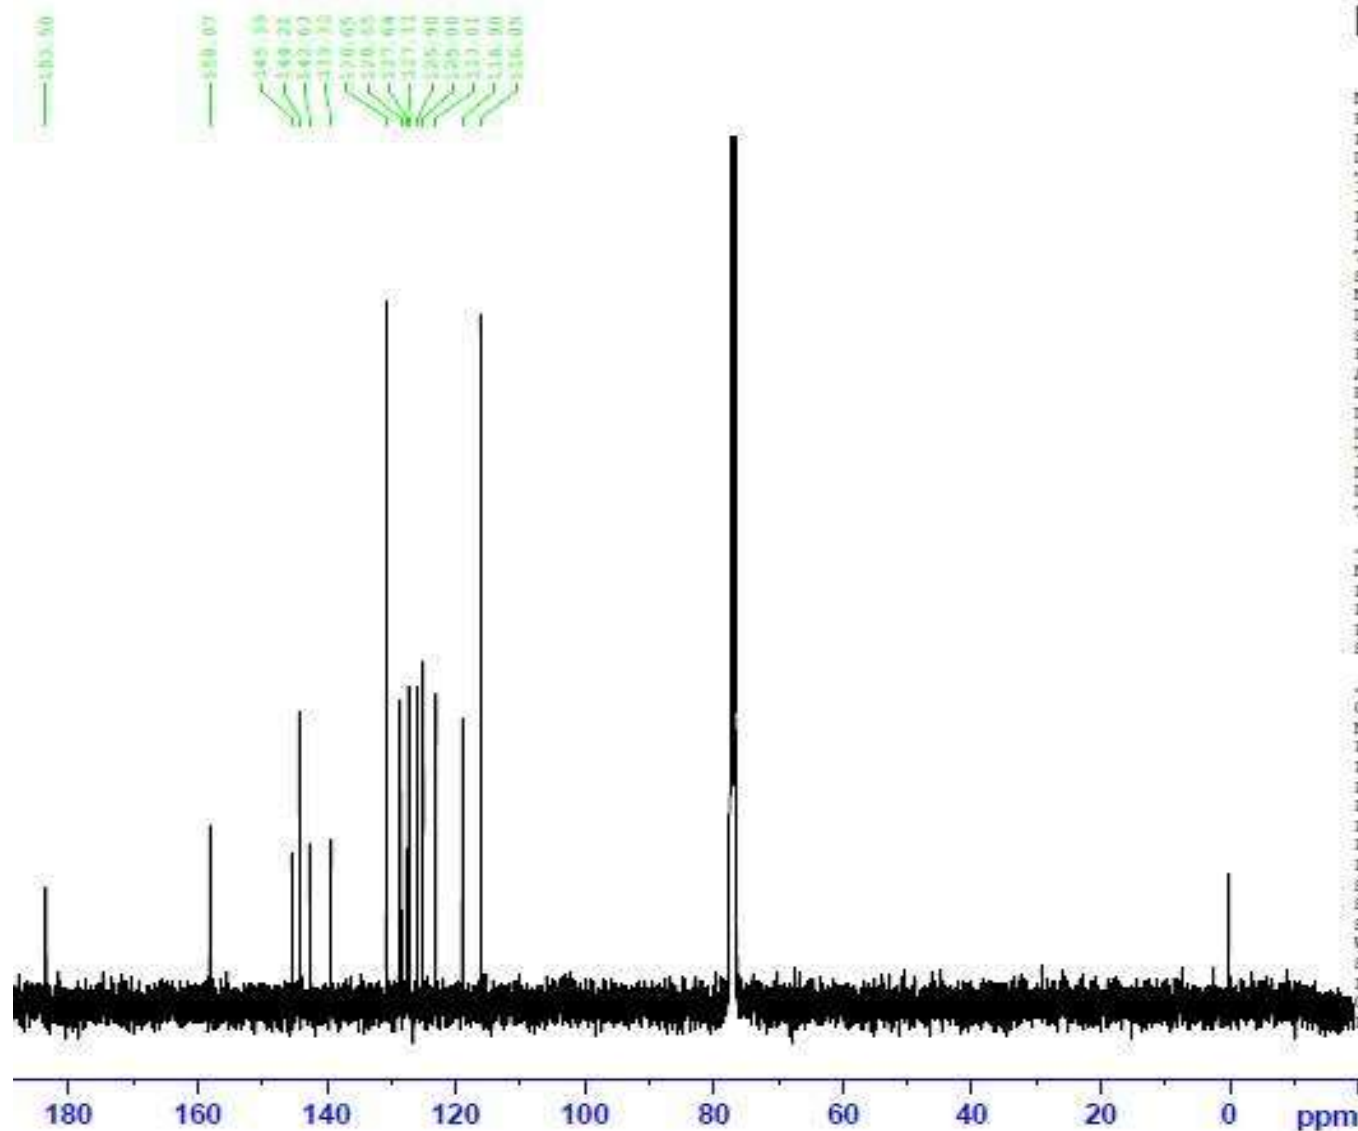

HRMS

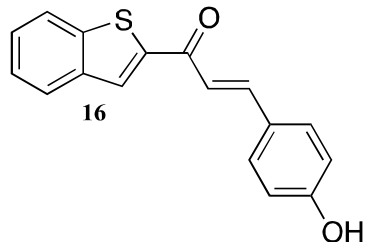

| Compound Label      | RT   | Algorithm       | Mass     |
|---------------------|------|-----------------|----------|
| Cpd 1: C17 H12 O2 S | 0.13 | Find By Formula | 280.0555 |

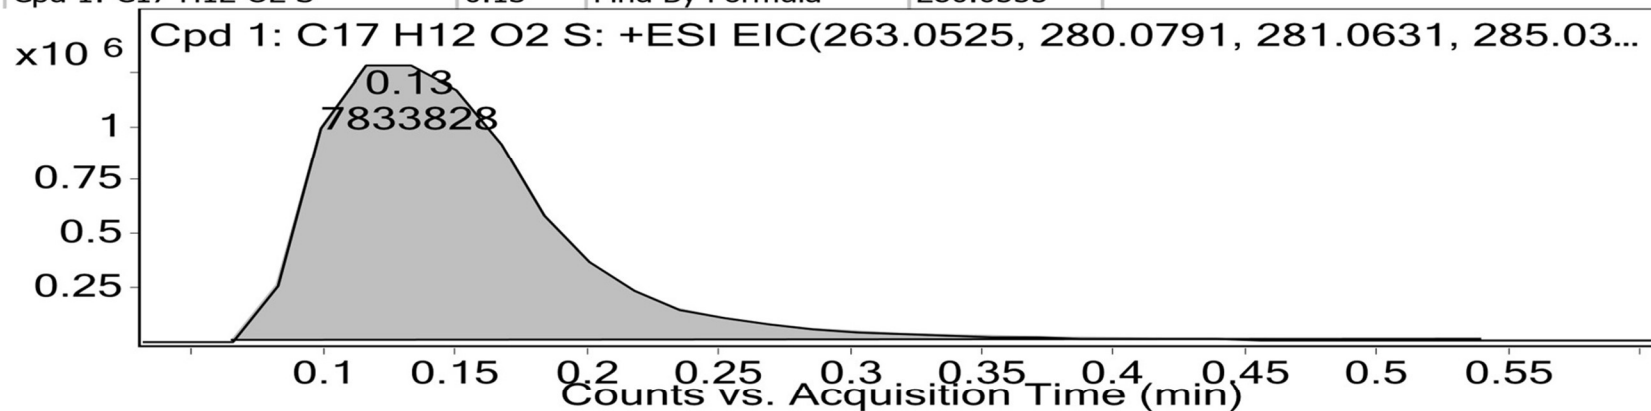

MS Spectrum

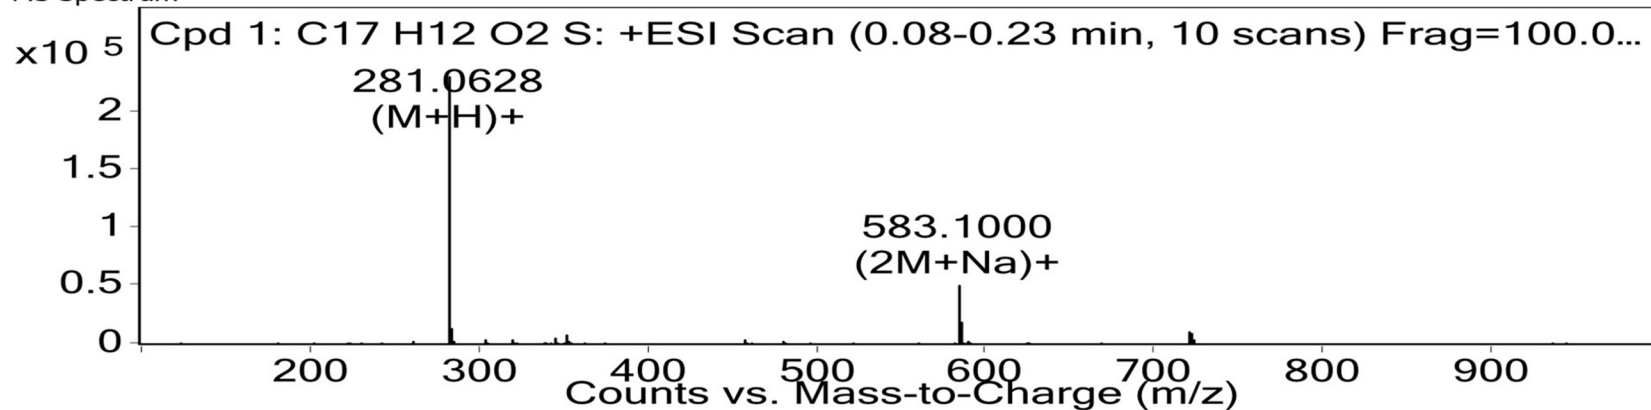

<sup>1</sup>H NMR

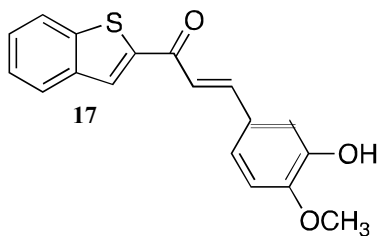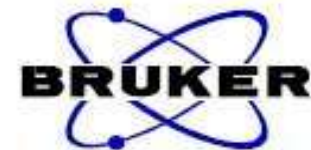

NAME Audrey Isabelle  
EXPNO 23  
PROCNO 1  
Date 20190329  
Time 9.22  
INSTRUM spect  
PROBHD 5 mm PABBO BB-  
PULPROG zg30  
TD 65536  
SOLVENT CDCl3  
NS 16  
DS 2  
SWH 8223.685 Hz  
FIDRES 0.125483 Hz  
AQ 3.9846387 sec  
RG 128  
DW 60.800 usec  
DE 6.50 usec  
TE 298.0 K  
D1 1.00000000 sec  
TD0 1

----- CHANNEL F1 -----  
NUC1 1H  
P1 14.07 usec  
PL1 0.30 dB  
PL1W 11.25229836 W  
SFO1 400.1324710 MHz  
SI 32768  
SF 400.1300000 MHz  
WDW EM  
SSB 0  
LB 0.30 Hz  
GB 0  
PC 1.00

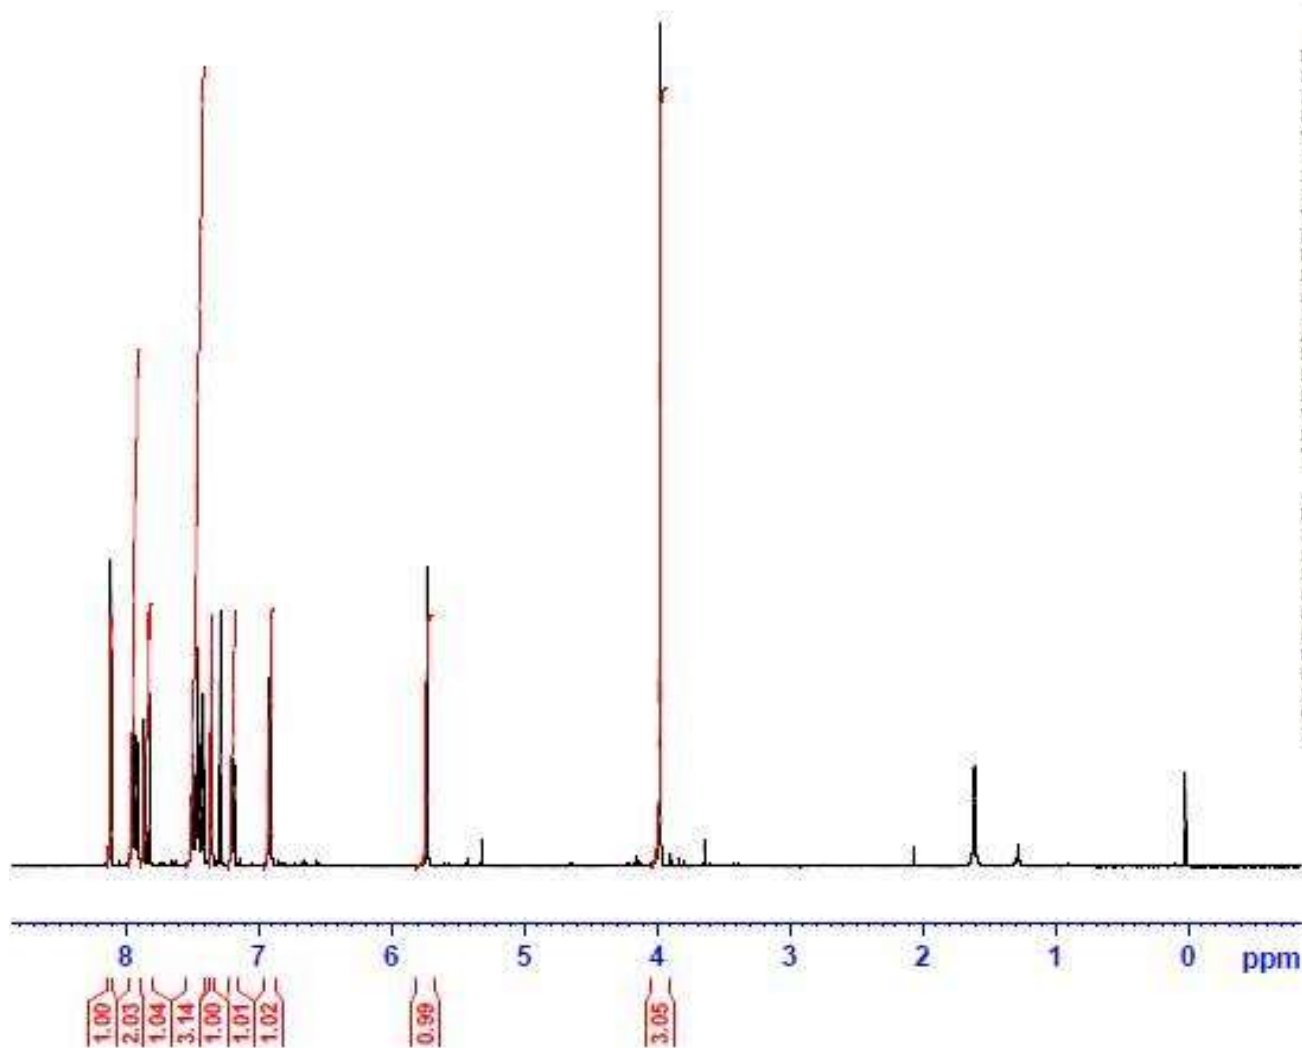

<sup>13</sup>C NMR

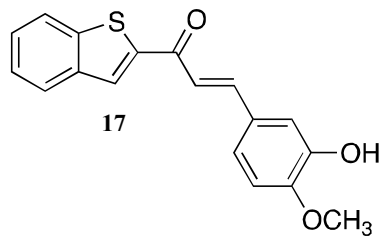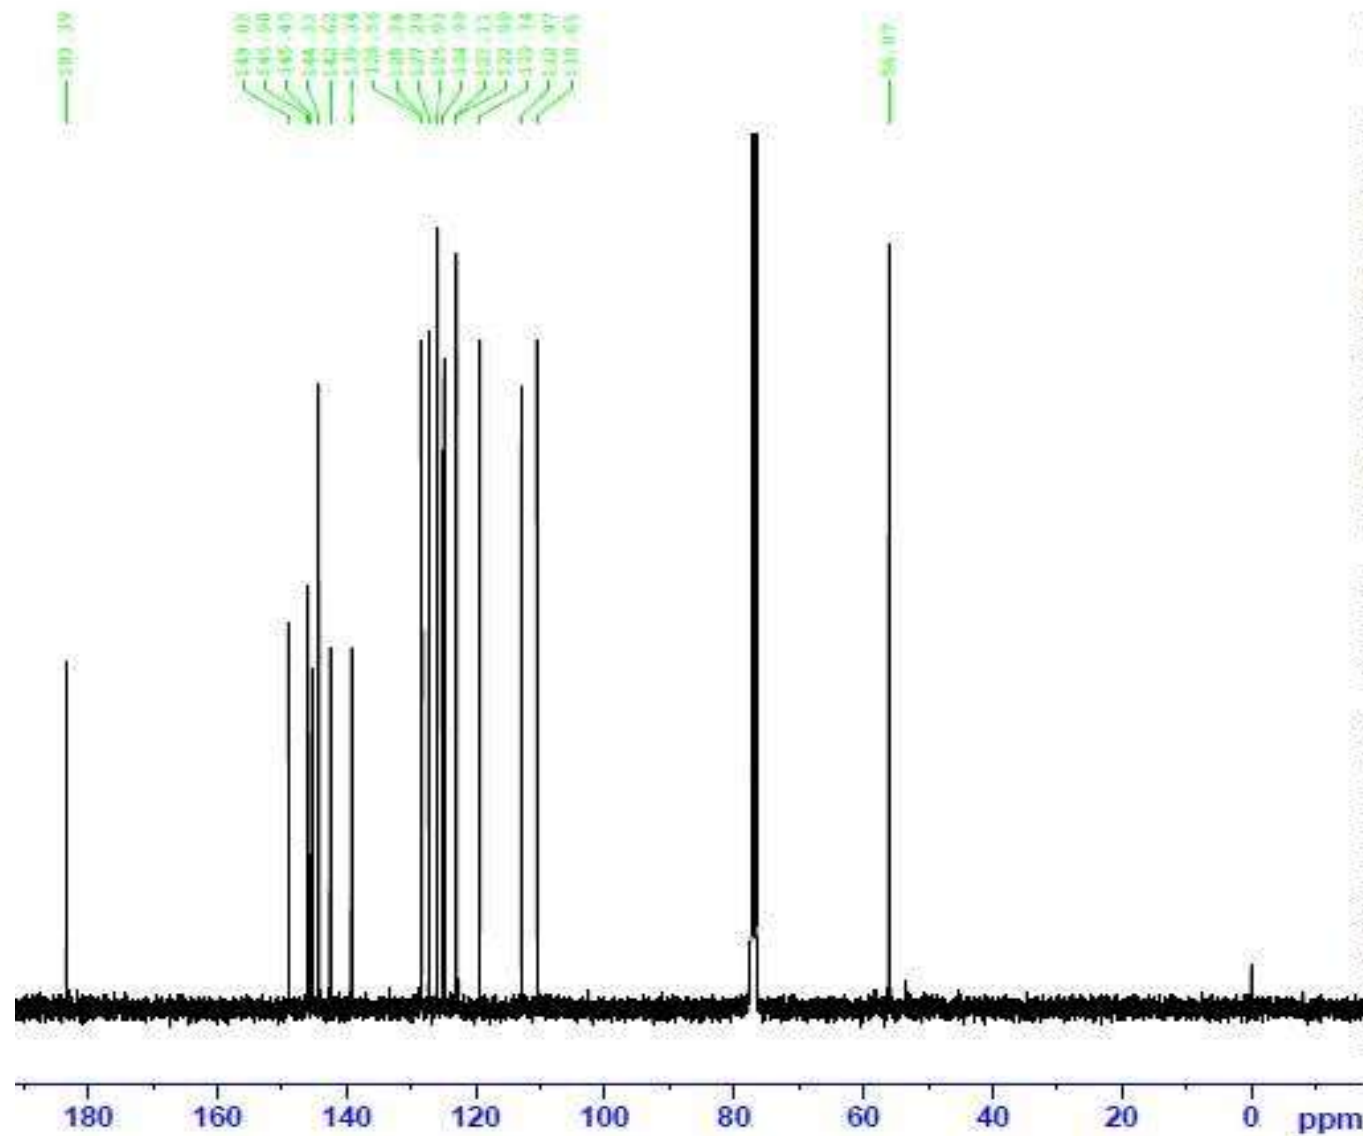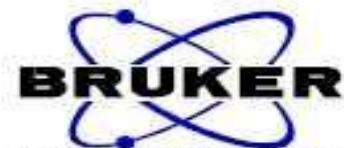

```
NAME Audrey Isabelle
EXPNO 24
PROCNO 1
Date_ 20190329
Time_ 16.32
INSTRUM spect
PROBHD 5 mm DABBO BB-
PULPROG zgpg30
TD 65536
SOLVENT CDCl3
NS 5629
DS 4
SWH 24038.461 Hz
FIDRES 0.366798 Hz
AQ 1.3631988 sec
RG 203
DW 20.800 usec
DE 6.50 usec
TE 298.0 K
D1 2.00000000 sec
D11 0.03000000 sec
TD0 1
```

```
----- CHANNEL f1 -----
NUC1 13C
P1 9.90 usec
PL1 -1.90 dB
PL1W 56.02249908 W
SFO1 100.6228298 MHz
```

```
----- CHANNEL f2 -----
CPDPRG2 waltz65
NUC2 1H
PCPD2 80.00 usec
PL2 0.30 dB
PL12 15.40 dB
PL13 18.40 dB
PL2W 11.25229836 W
PL12W 0.34772930 W
PL13W 0.17427748 W
SFO2 400.1316005 MHz
SI 32768
SF 100.6127690 MHz
WDW EM
SSB 0
LB 1.00 Hz
GB 0
PC 1.40
```

HRMS

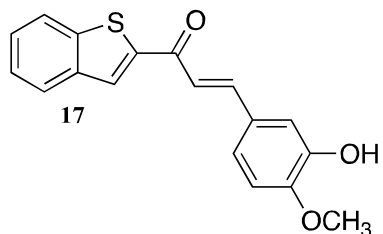

| Compound Label                                          | RT   | Algorithm       | Mass     |
|---------------------------------------------------------|------|-----------------|----------|
| Cpd 1: C <sub>18</sub> H <sub>14</sub> O <sub>3</sub> S | 0.12 | Find By Formula | 310.0657 |

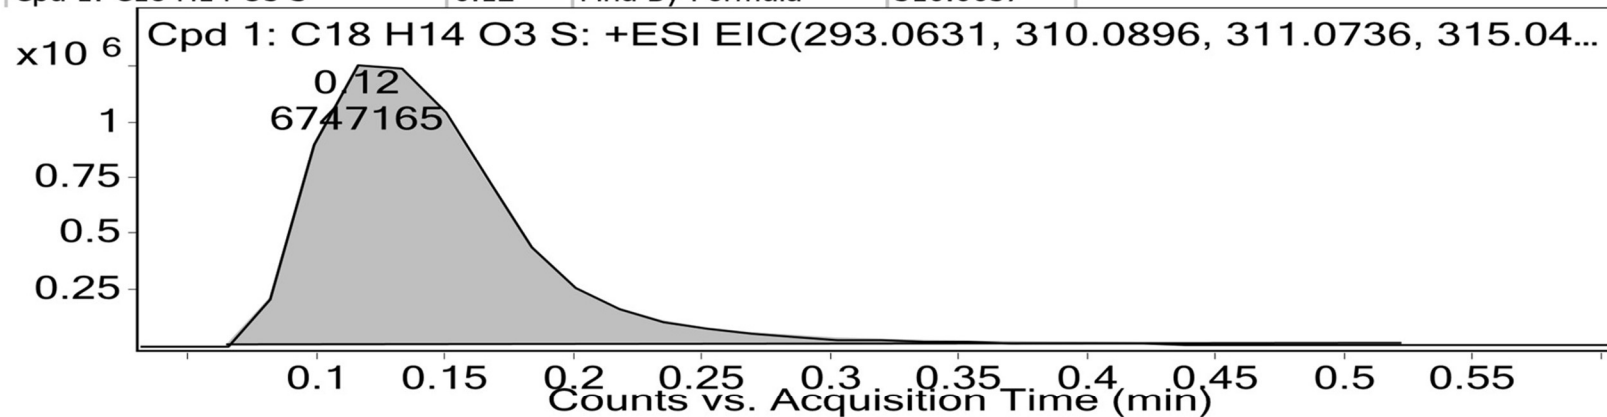

MS Spectrum

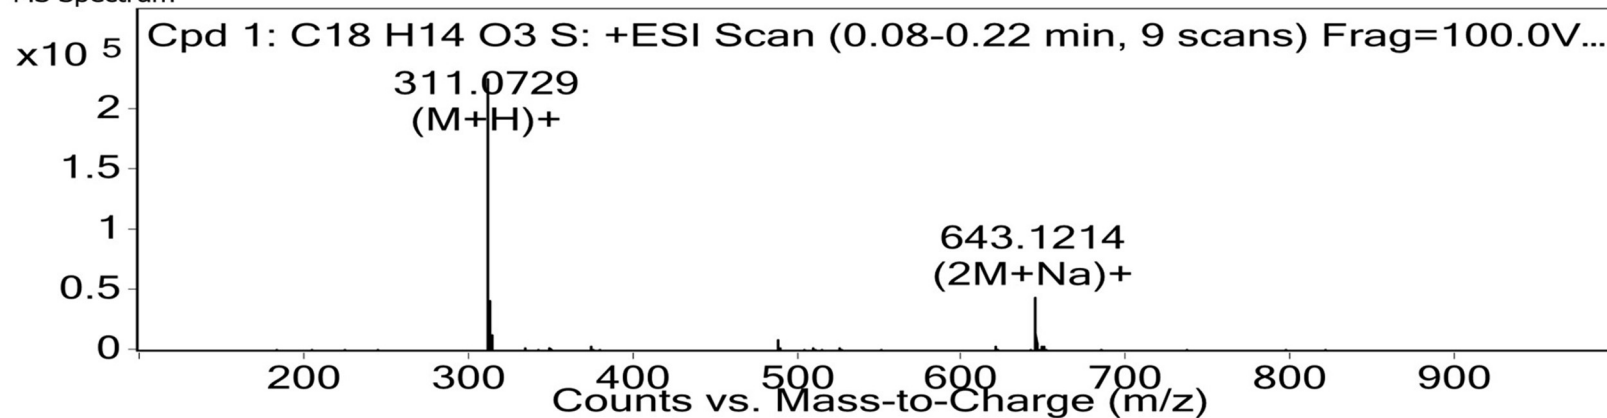



<sup>1</sup>H NMR

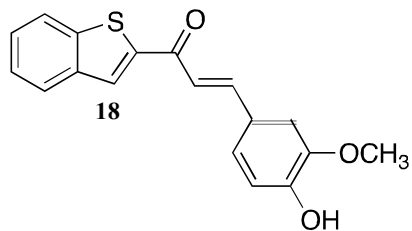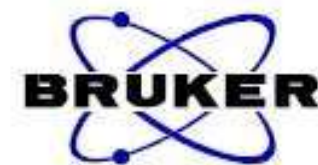

NAME Audrey Isabelle  
EXPNO 19  
PROCNO 1  
Date\_ 20190318  
Time\_ 9:03  
INSTRUM spect  
PROBHD 5 mm PABBO BB-  
PULPROG zg30  
TD 65536  
SOLVENT CDCl3  
NS 16  
DS 2  
SWH 8223.685 Hz  
FIDRES 0.125483 Hz  
AQ 3.9846387 sec  
RG 181  
DW 60.800 usec  
DE 6.50 usec  
TE 298.0 K  
D1 1.00000000 sec  
TDS 1

----- CHANNEL f1 -----  
NUC1 1H  
P1 14.07 usec  
PL1 0.30 dB  
PL1W 11.25229836 W  
SFO1 400.1324710 MHz  
SI 32768  
SF 400.1300000 MHz  
WDW EM  
SSB 0  
LB 0.30 Hz  
GB 0  
PC 1.00

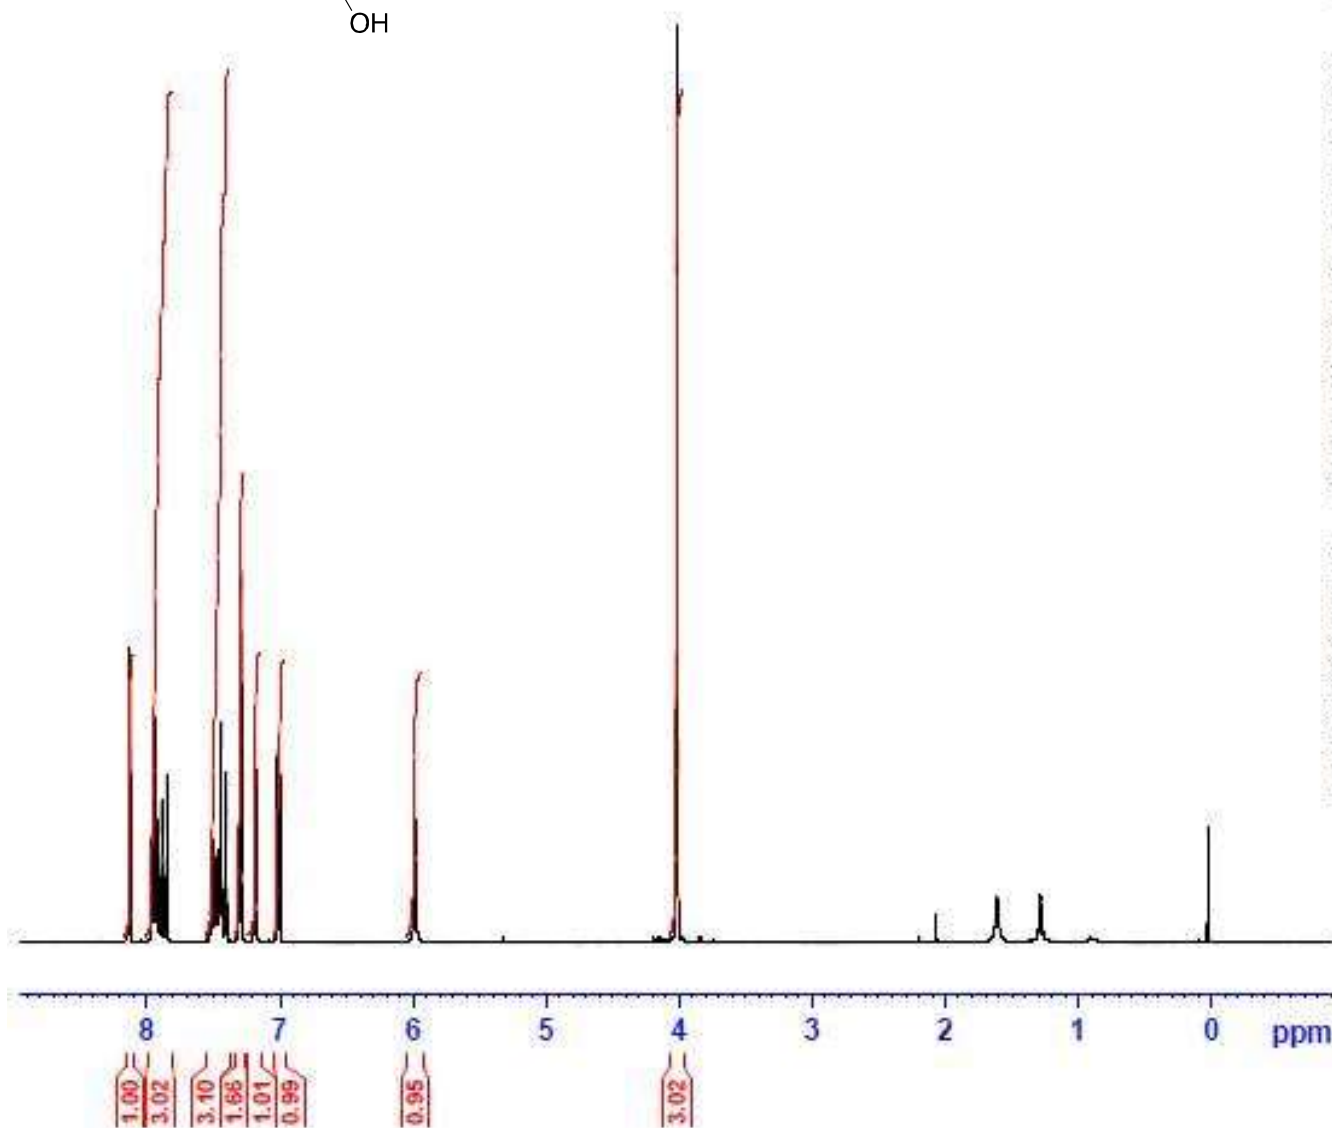

<sup>13</sup>C NMR

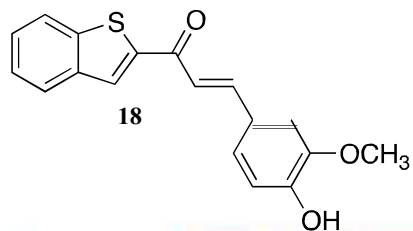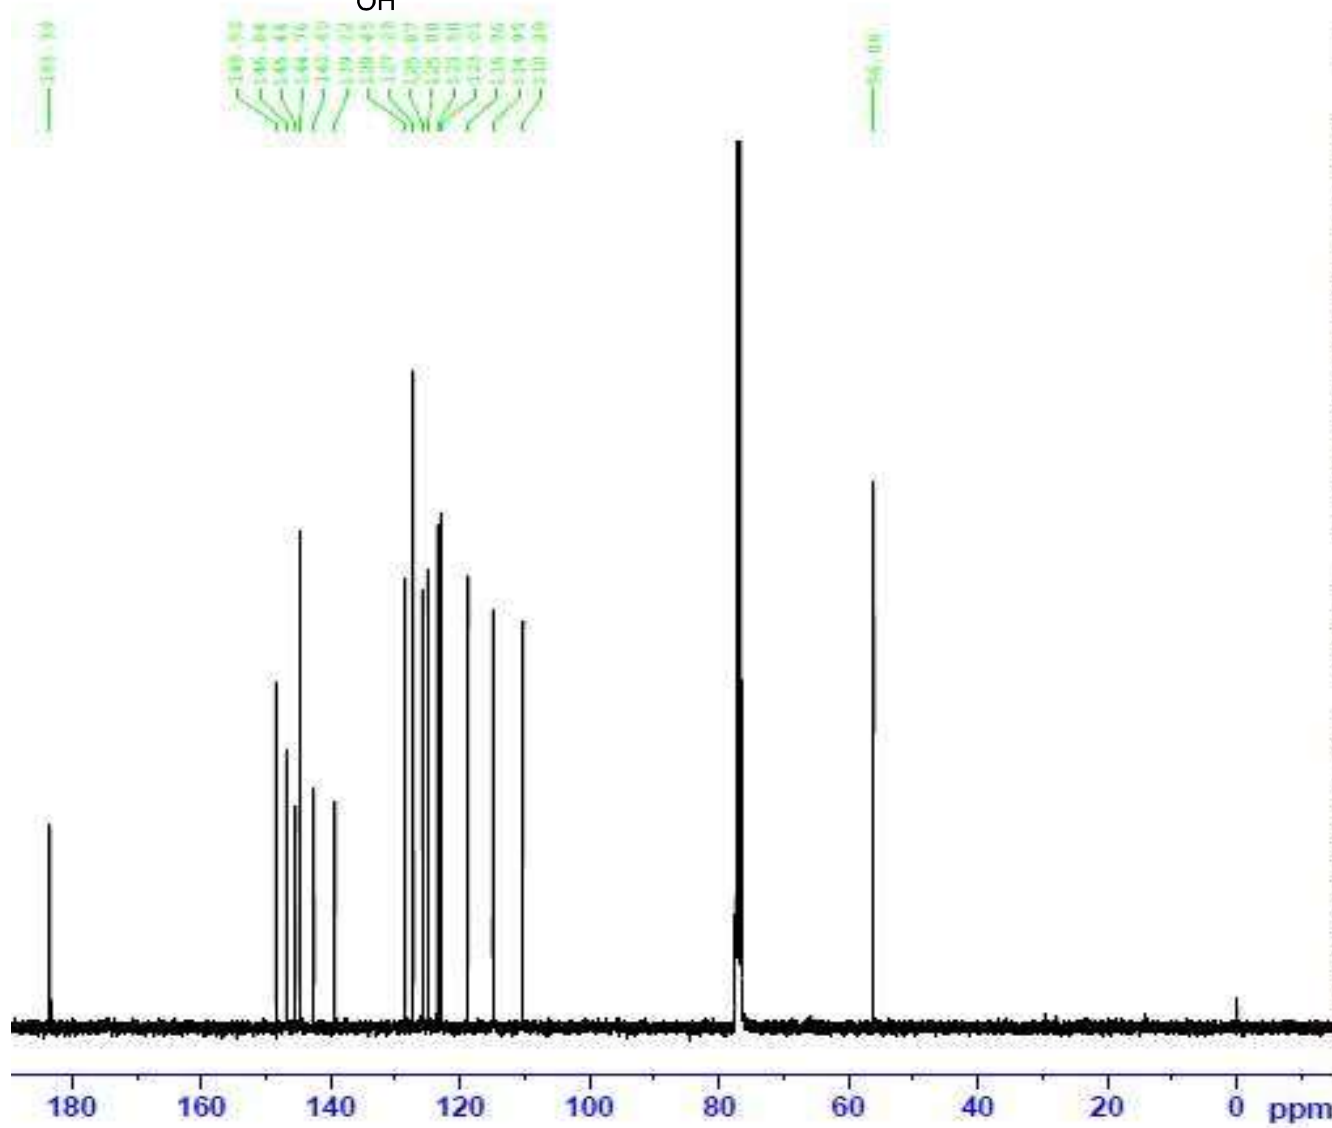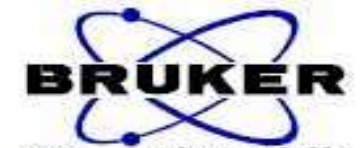

```
NAME Audrey Isabelle
EXPNO 20
PROCNO 1
Date_ 20190318
Time 16.27
INSTRUM spect
PROBHD 5 mm DABBO BB-
PULPROG zgpg30
TD 65536
SOLVENT CDCl3
NS 7716
DS 4
SWH 24038.461 Hz
FIDRES 0.366798 Hz
AQ 1.3631988 sec
RG 203
DW 20.800 usec
DE 6.50 usec
TE 298.0 K
D1 2.00000000 sec
D11 0.03000000 sec
TD0 1

----- CHANNEL f1 -----
NUC1 13C
P1 9.90 usec
PL1 -1.90 dB
PL1W 56.02249908 W
SFO1 100.6228298 MHz

----- CHANNEL f2 -----
CPDPRG2 waltz6S
NUC2 1H
PCPD2 80.00 usec
PL2 0.30 dB
PL12 15.40 dB
PL13 18.40 dB
PL2W 11.25229836 W
PL12W 0.34772930 W
PL13W 0.17427748 W
SFO2 400.1316005 MHz
SI 32768
SF 100.6127690 MHz
WDW EM
SSB 0
LB 1.00 Hz
GB 0
PC 1.40
```

HRMS

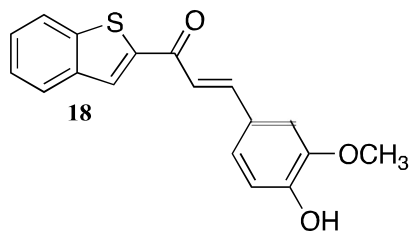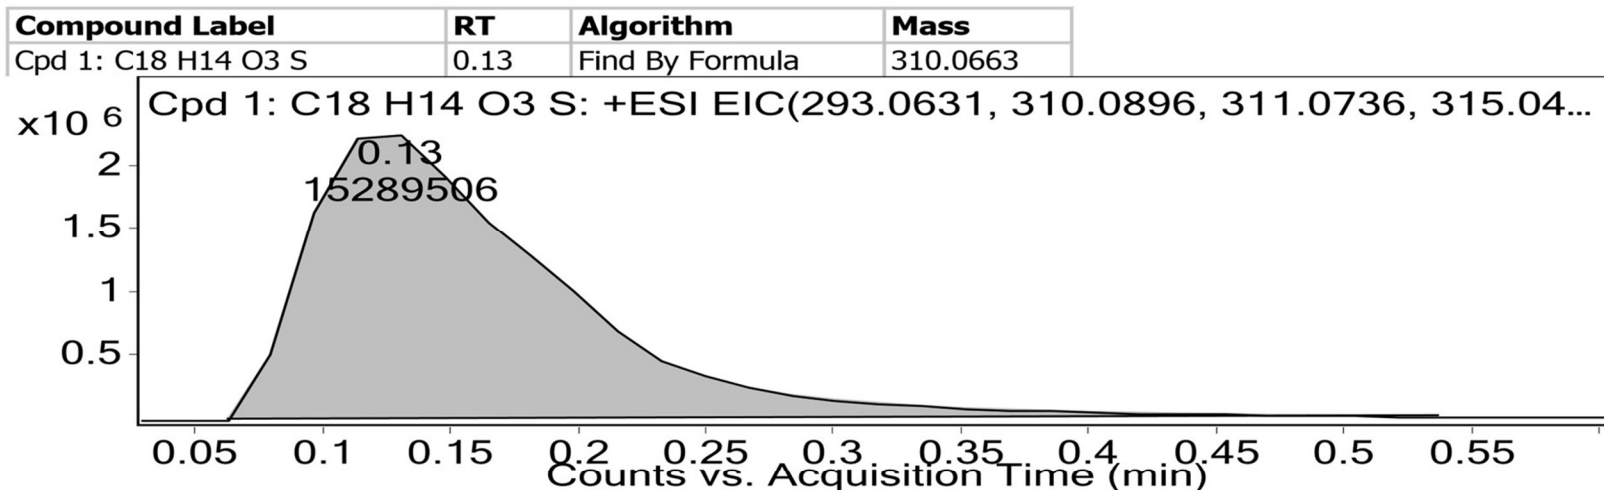

MS Spectrum

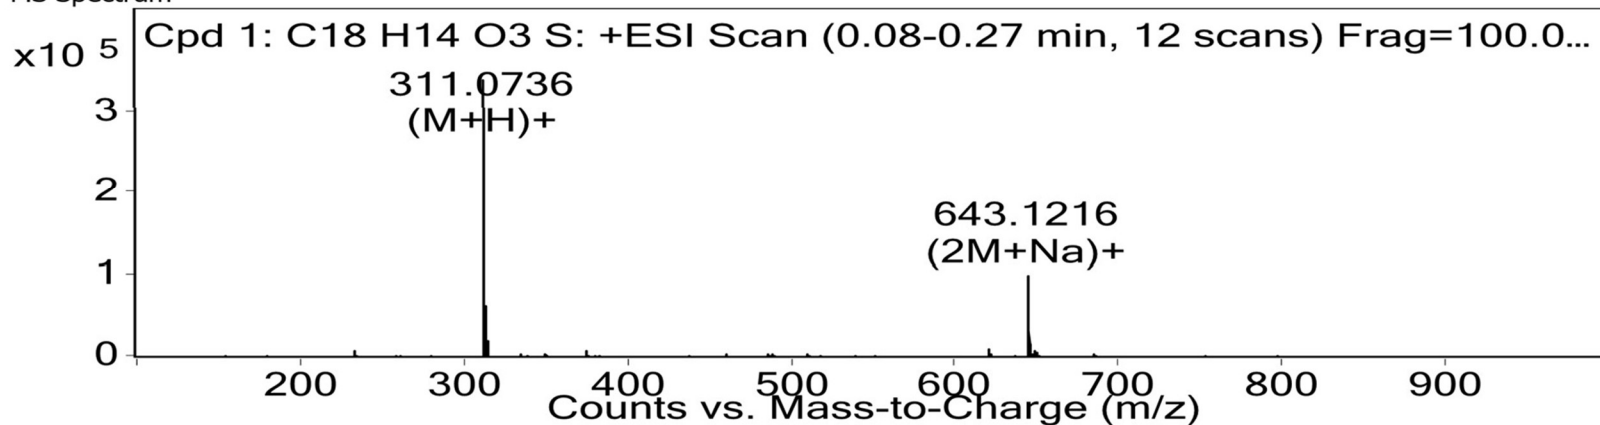

<sup>1</sup>H NMR

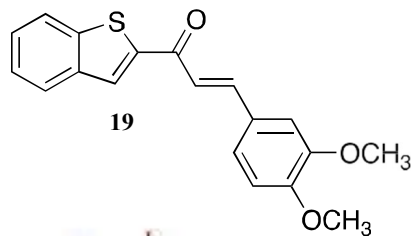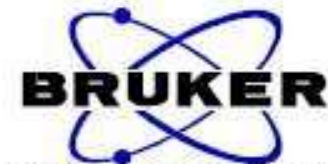

```
NAME      Audrey Isabelle
EXPNO     74
PROCNO    1
Date_     20190619
Time      8.54
INSTRUM   spect
PROBHD    5 mm PABBO BB-
PULPROG   zg30
TD        65536
SOLVENT   CDCl3
NS        16
DS        2
SWH       8223.685 Hz
FIDRES    0.125483 Hz
AQ        3.9846387 sec
RG        114
DW        60.800 usec
DE        6.50 usec
TE        298.0 K
D1        1.00000000 sec
TD0       1
```

```
----- CHANNEL f1 -----
NUC1      1H
P1        14.07 usec
PL1       0.30 dB
PL1W      11.25229836 W
SFO1      400.1324710 MHz
SI        32768
SF        400.1300000 MHz
WDW       EM
SSB       0
LB        0.30 Hz
GB        0
PC        1.00
```

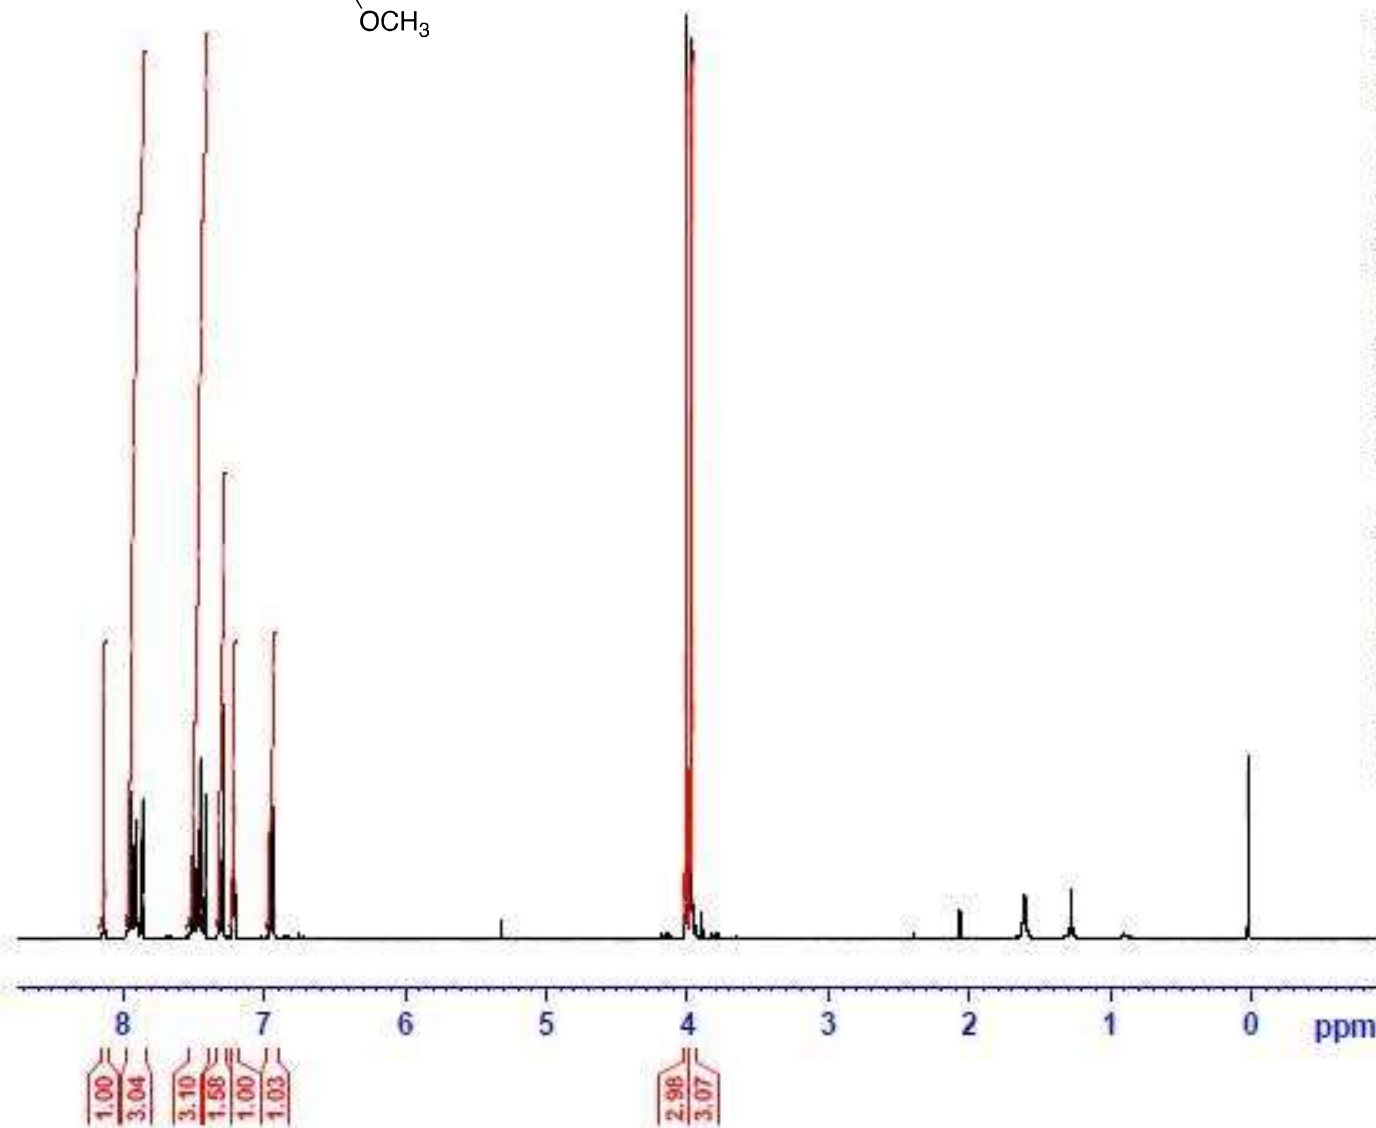

<sup>13</sup>C NMR

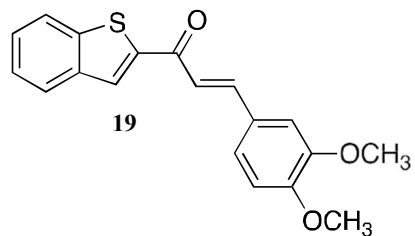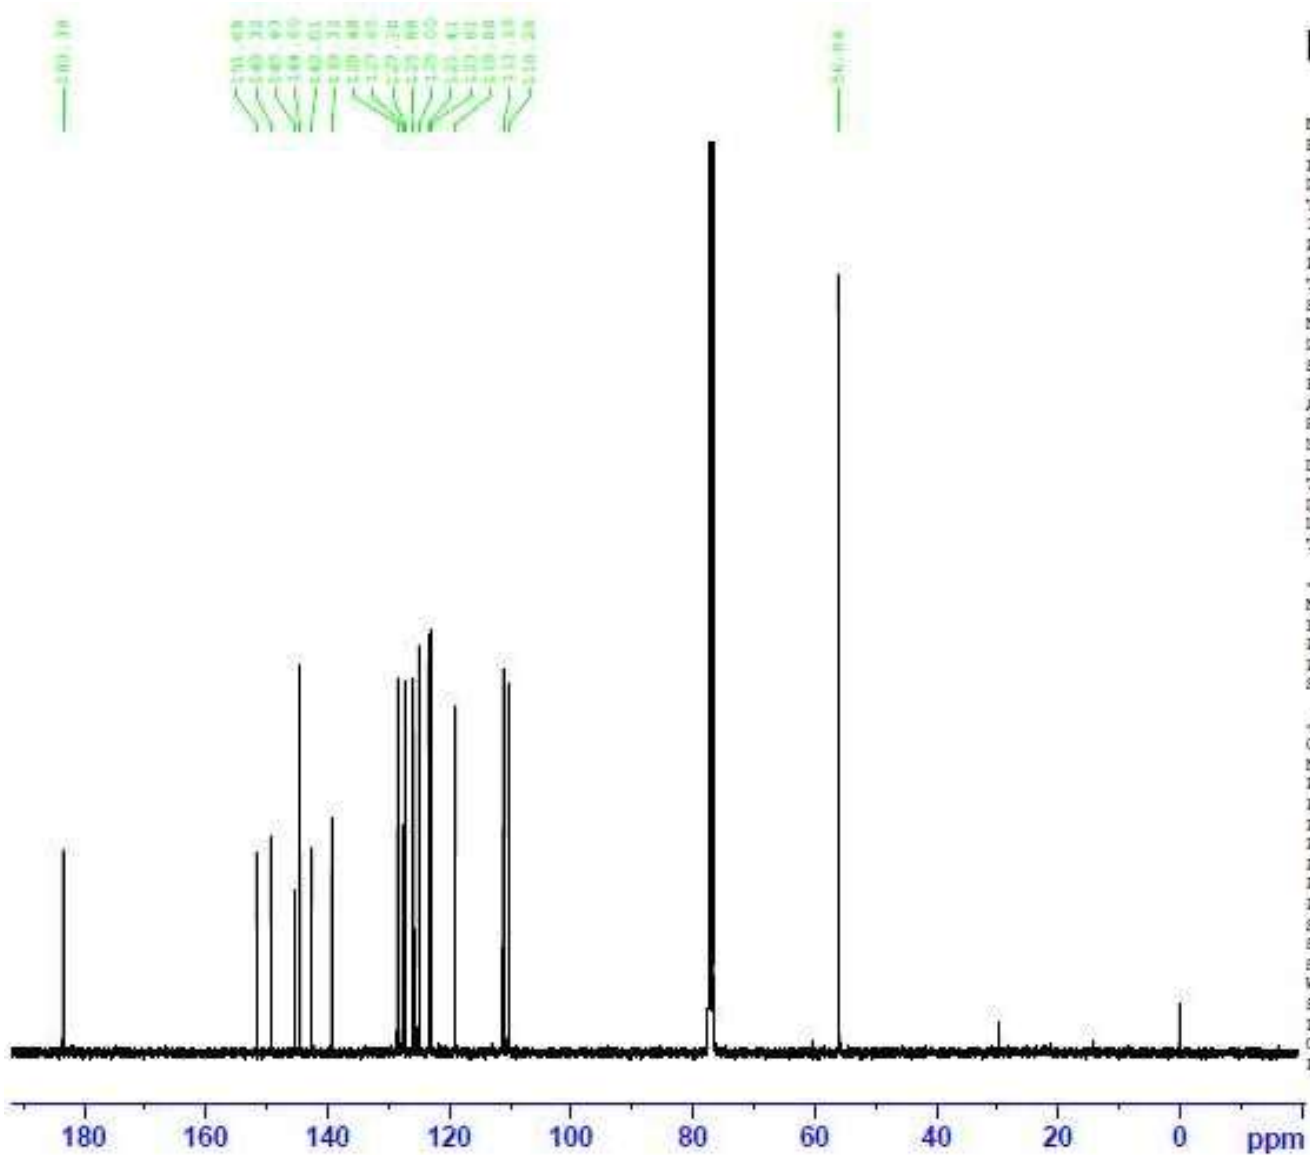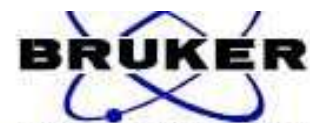

NAME Audrey Isabelle  
EXPMO 82  
PROCNO 1  
Date\_ 20190621  
Time\_ 2.09  
INSTRUM spect  
PROBHD 5 mm PABBO BB-  
PULPROG zgpg30  
TD 65536  
SOLVENT CDCl3  
NS 10000  
DS 4  
SWH 24038.461 Hz  
FIDRES 0.366798 Hz  
AQ 1.3631988 sec  
RG 203  
DW 20.800 usec  
DE 6.50 usec  
TE 298.0 K  
D1 2.00000000 sec  
D11 0.03000000 sec  
TD0 1

----- CHANNEL f1 -----  
NUC1 13C  
P1 9.90 usec  
PL1 -1.90 dB  
PL1W 56.02249908 W  
SFO1 100.6228298 MHz

----- CHANNEL f2 -----  
CPDPRG2 waltz65  
NUC2 1H  
PCPD2 80.00 usec  
PL2 0.30 dB  
PL12 15.40 dB  
PL13 18.40 dB  
PL2W 11.25229836 W  
PL12W 0.34772930 W  
PL13W 0.17427748 W  
SFO2 400.1316005 MHz  
S1 32768  
SF 100.6127690 MHz  
WDW EM  
SSB 0  
LB 1.00 Hz  
GB 0  
PC 1.40

HRMS

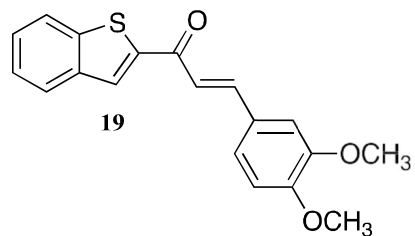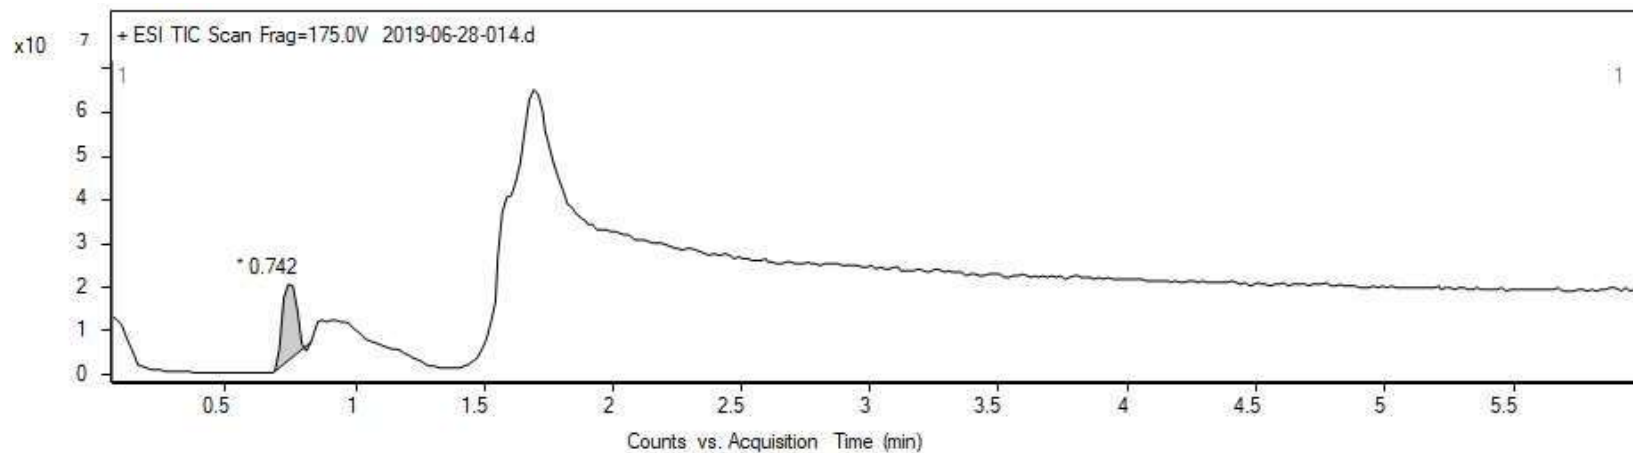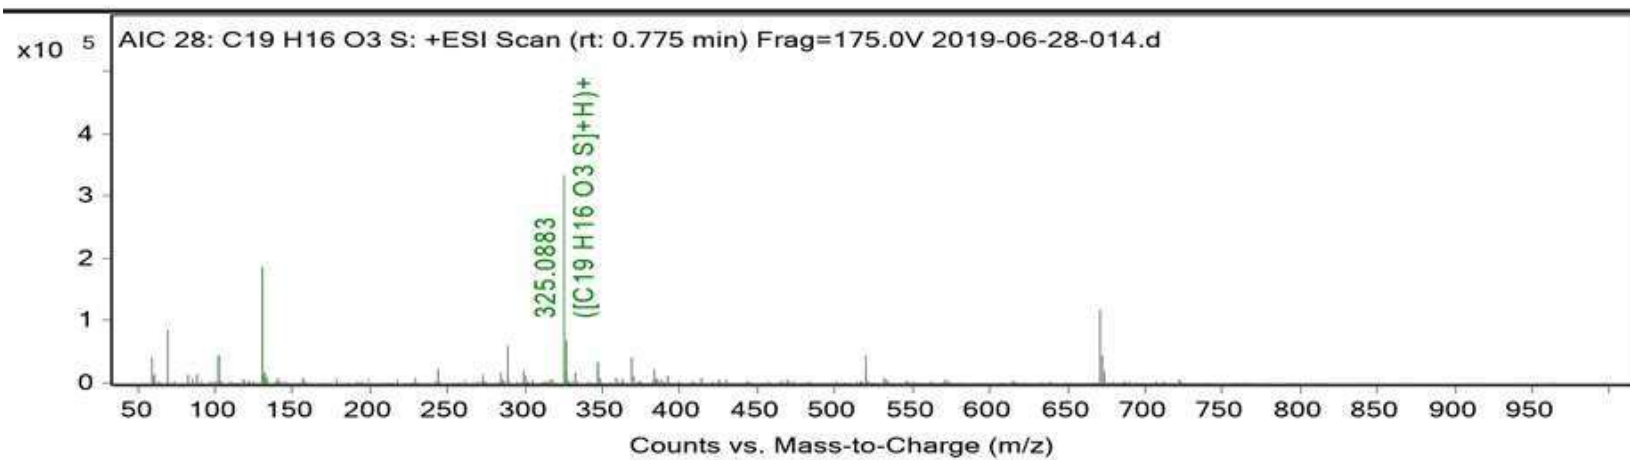

<sup>1</sup>H NMR

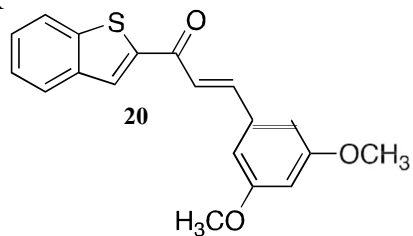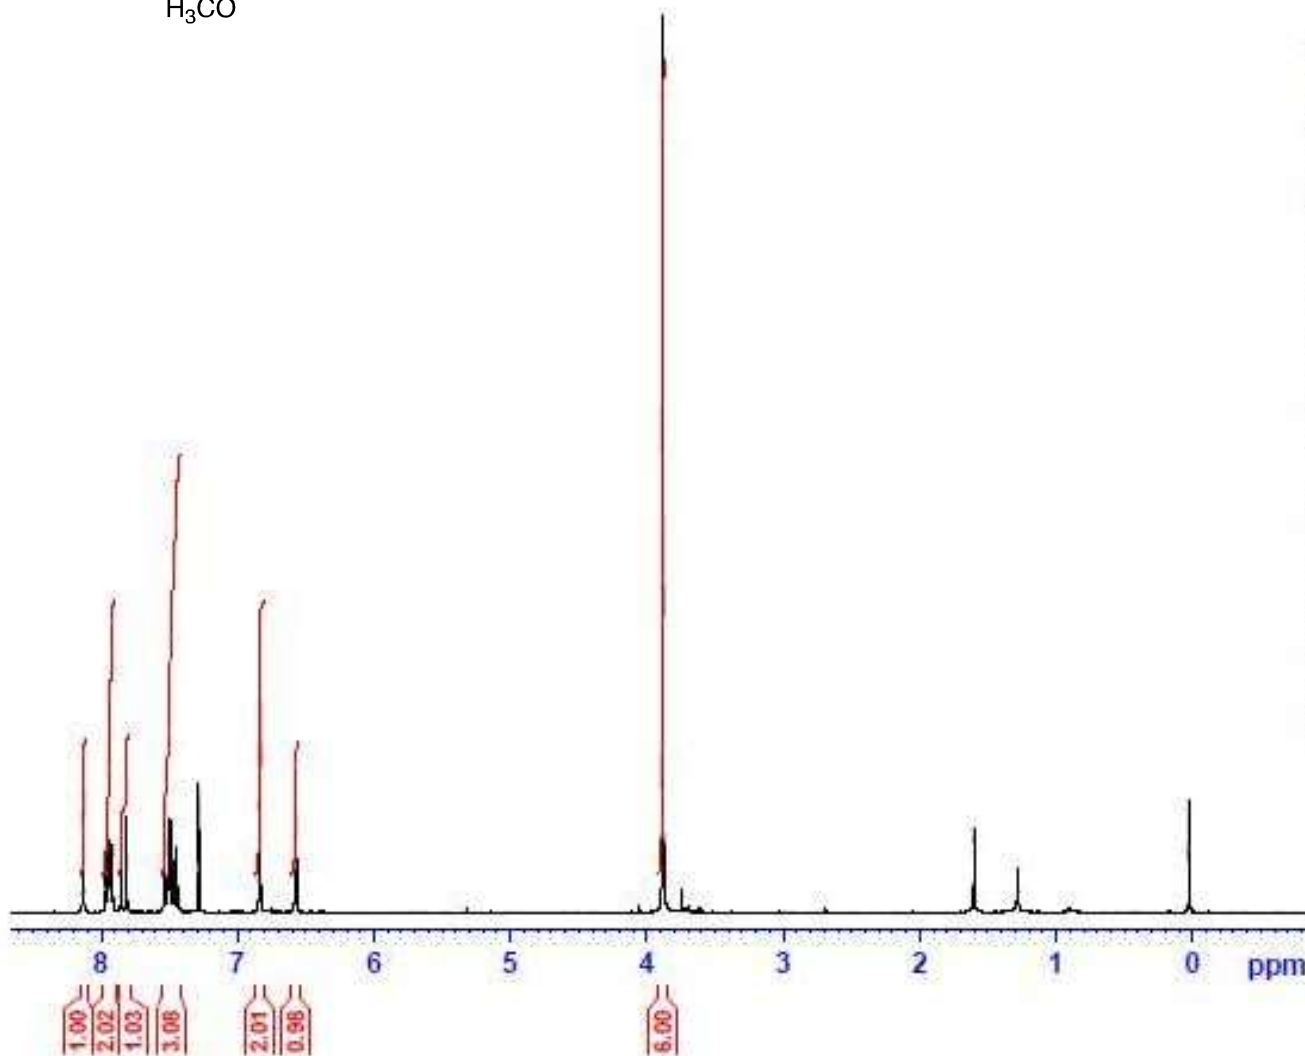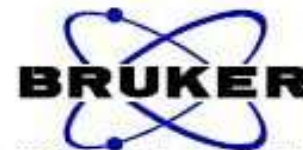

NAME Audrey Isabelle  
EXDNO 58  
PROCNO 1  
Date\_ 20190607  
Time 11.29  
INSTRUM spect  
PROBHD 5 mm DABBO BB-  
PULPROG zg30  
TD 65536  
SOLVENT CDCl3  
NS 16  
DS 2  
SWH 8223.685 Hz  
FIDRRS 0.125483 Hz  
AQ 3.9846387 sec  
RG 114  
DM 60.800 usec  
DE 6.50 usec  
TE 298.0 K  
D1 1.00000000 sec  
TDO 1

----- CHANNEL F1 -----  
NUC1 1H  
P1 14.07 usec  
PL1 0.10 dB  
PL1W 11.25229836 W  
SFO1 400.1324710 MHz  
SI 32768  
SF 400.1300000 MHz  
WDW EM  
SSB 0  
LB 0.10 Hz  
GB 0  
PC 1.00

<sup>13</sup>C NMR

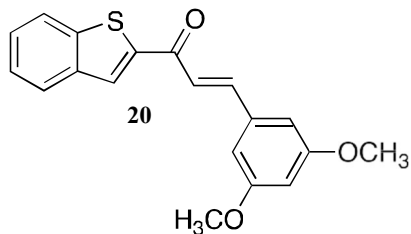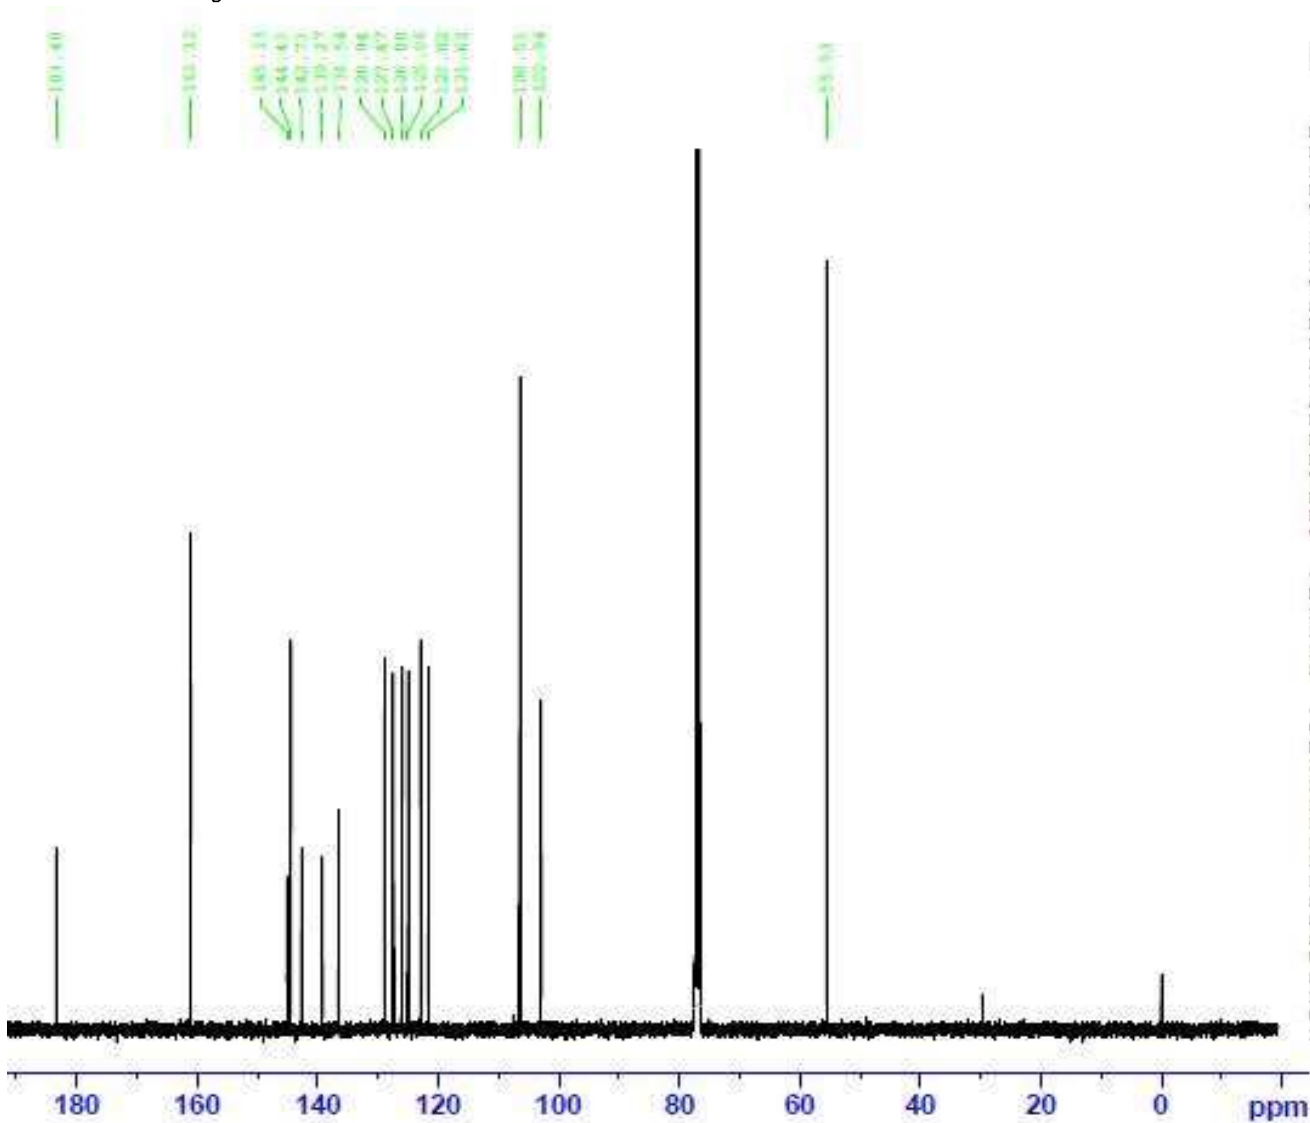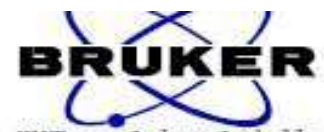

NAME Audrey Isabelle  
EXPNO 59  
PROCNO 1  
Date\_ 20190607  
Time 14.39  
INSTRUM spect  
PROBHD 5 mm PABBO BB-  
PULPROG zgpg30  
TD 65536  
SOLVENT CDCl3  
NS 3292  
DS 4  
SWH 24038.461 Hz  
FIDRES 0.366798 Hz  
AQ 1.3631988 sec  
RG 203  
EW 20.800 usec  
DE 6.50 usec  
TE 298.0 K  
D1 2.00000000 sec  
D11 0.03000000 sec  
TD0 1

----- CHANNEL f1 -----  
NUC1 13C  
P1 9.90 usec  
PL1 -1.90 dB  
PL1W 56.02249908 W  
SFO1 100.6228298 MHz

----- CHANNEL f2 -----  
CDDPRG2 waltz65  
NUC2 1H  
PCPD2 80.00 usec  
PL2 0.30 dB  
PL12 15.40 dB  
PL13 18.40 dB  
PL2W 11.25229836 W  
PL12W 0.34772930 W  
PL13W 0.17427748 W  
SFO2 400.1316005 MHz  
SI 32768  
SF 100.6127690 MHz  
WDW EM  
SSE 0  
LB 1.00 Hz  
GB 0  
PC 1.40



HRMS

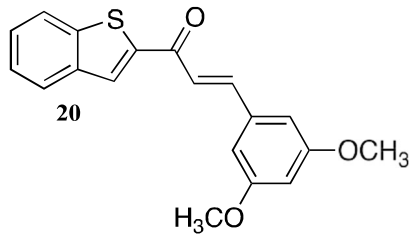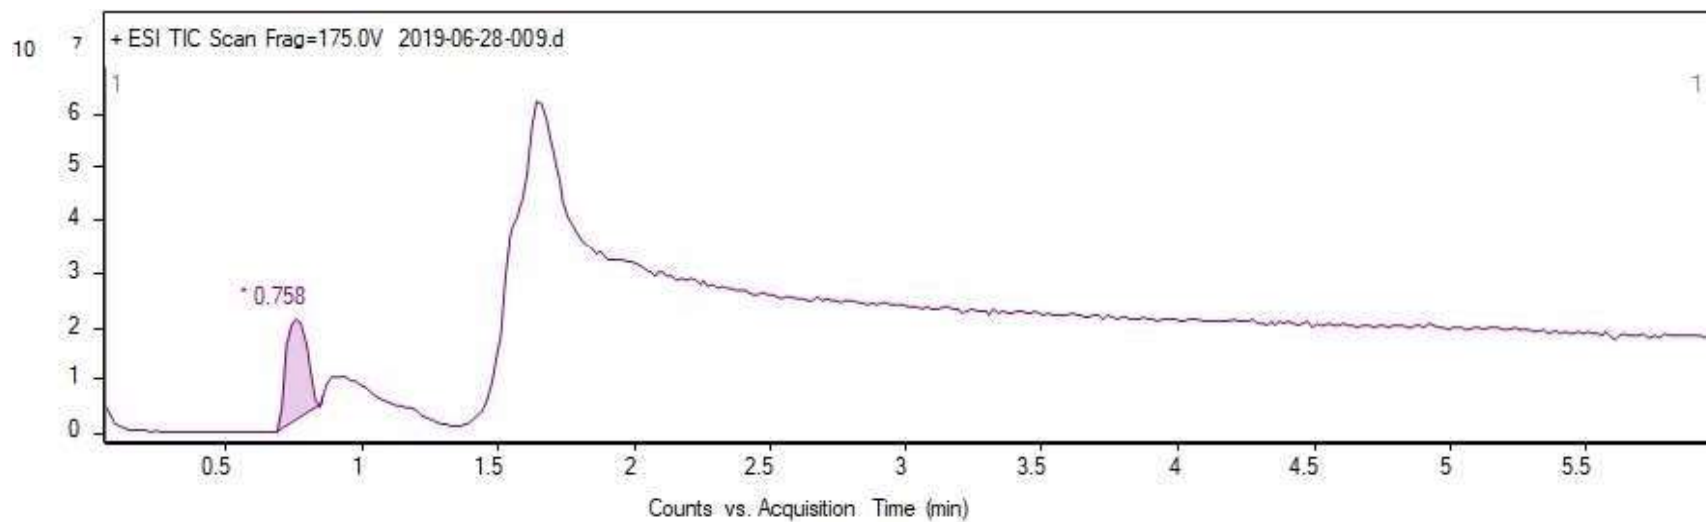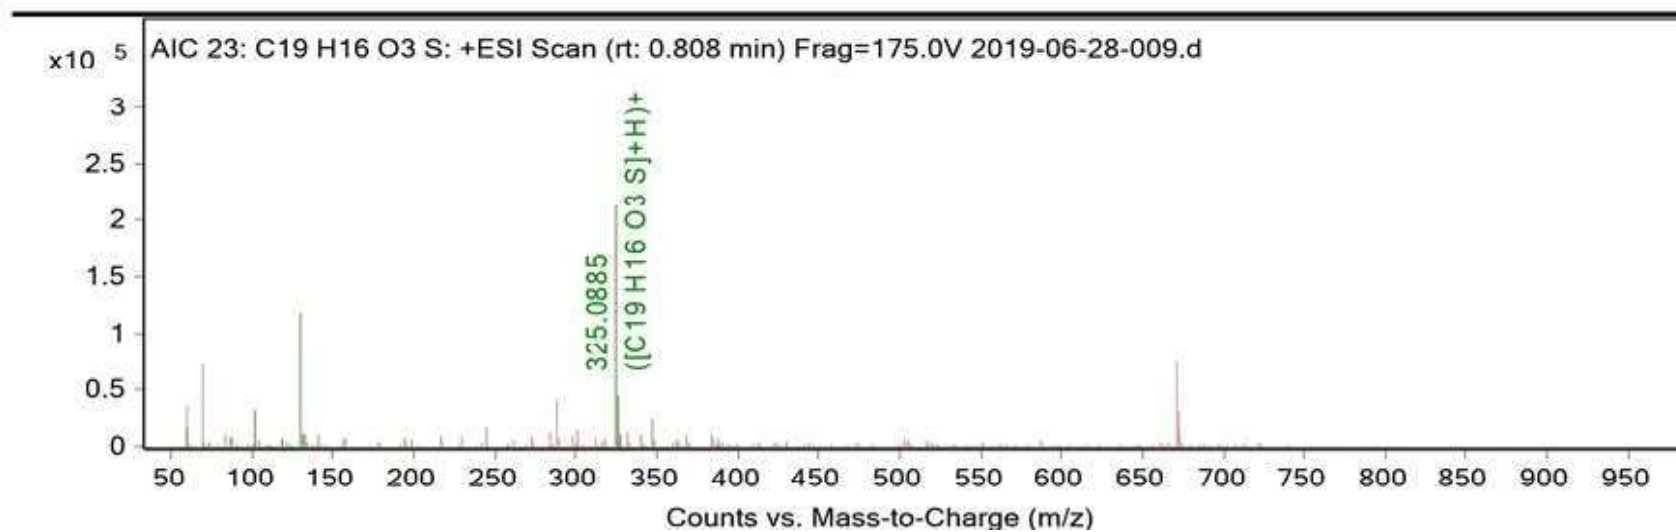

<sup>1</sup>H NMR

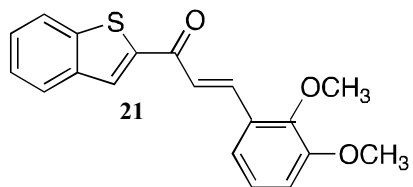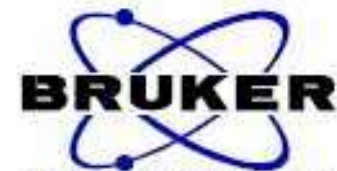

NAME Andrey Isabelle  
EXPNO 83  
PROCNO 1  
Date 20190621  
Time 8.27  
INSTRUM spect  
PROBHD 5 mm PABBO BB-  
PULPROG zg30  
TD 65536  
SOLVENT CDCl3  
NS 16  
DS 2  
SWH 8223.685 Hz  
FIDRES 0.125483 Hz  
AQ 3.9846387 sec  
RG 64  
LW 60.800 usec  
DE 6.50 usec  
TE 298.0 K  
D1 1.00000000 sec  
TD0 1

----- CHANNEL f1 -----  
NUC1 1H  
P1 14.07 usec  
PL1 0.30 dB  
PL1W 11.25229836 W  
SFO1 400.1324710 MHz  
SI 32768  
SF 400.1300000 MHz  
WDW EM  
SSB 0  
LB 0.30 Hz  
CB 0  
PC 1.00

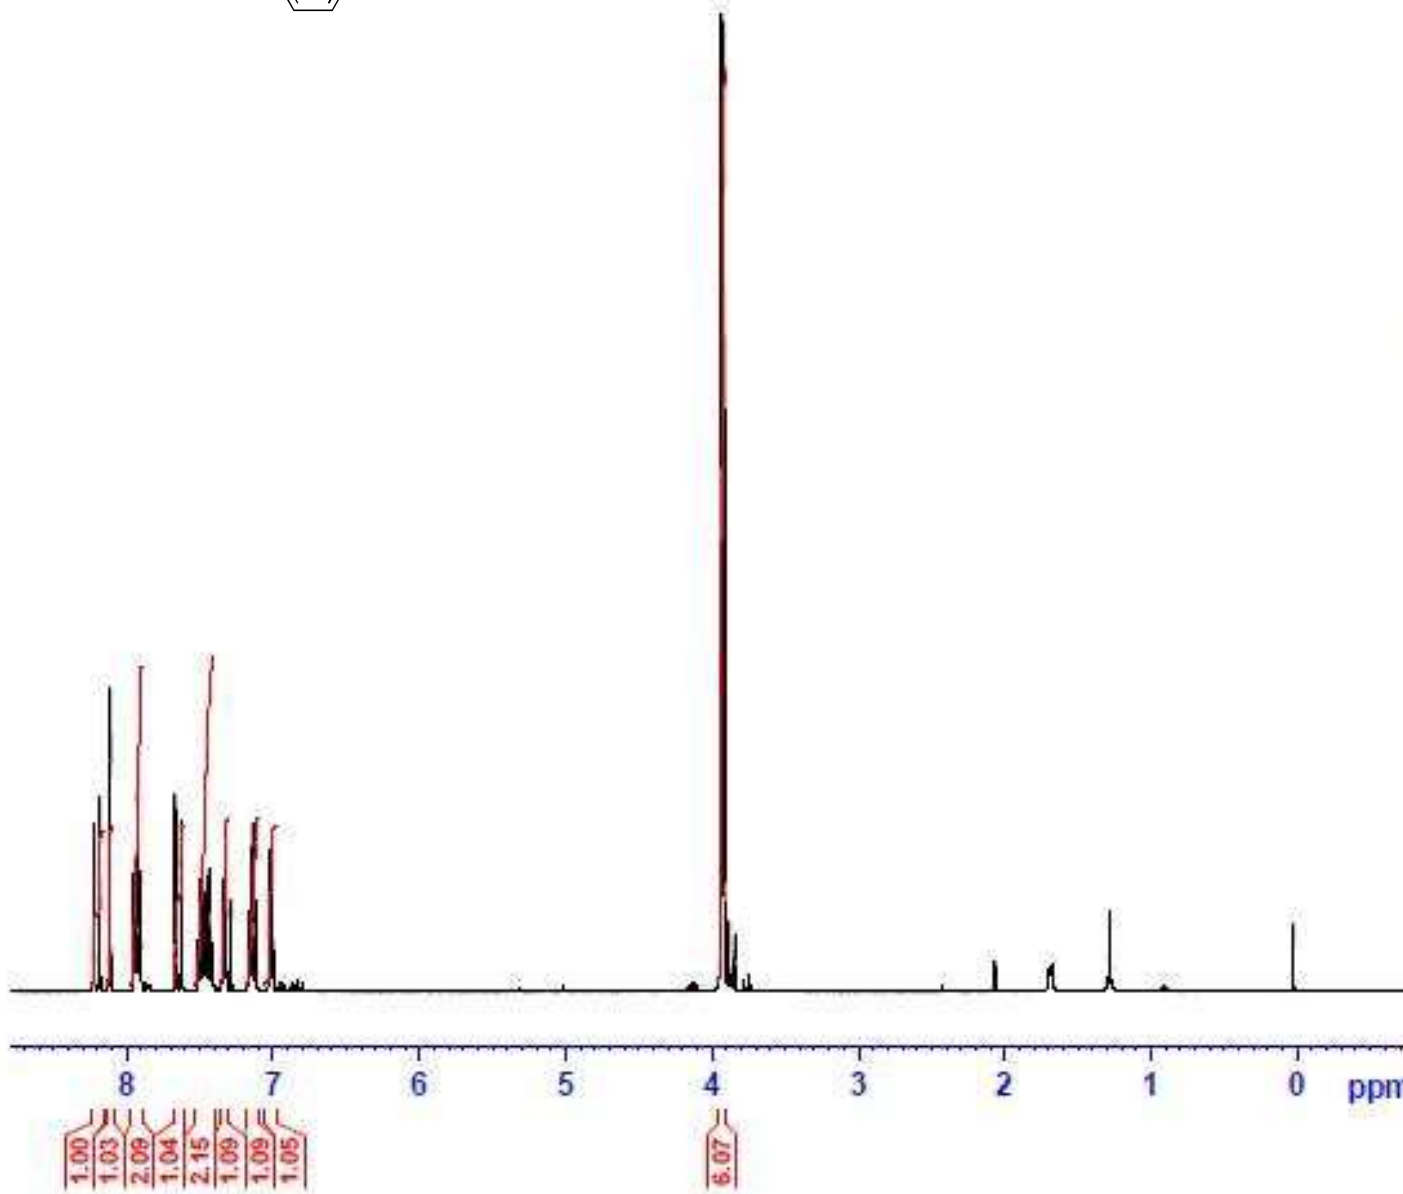

<sup>13</sup>C NMR

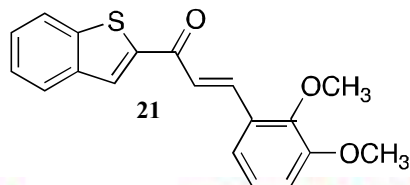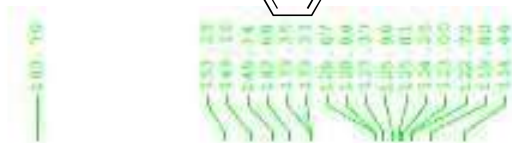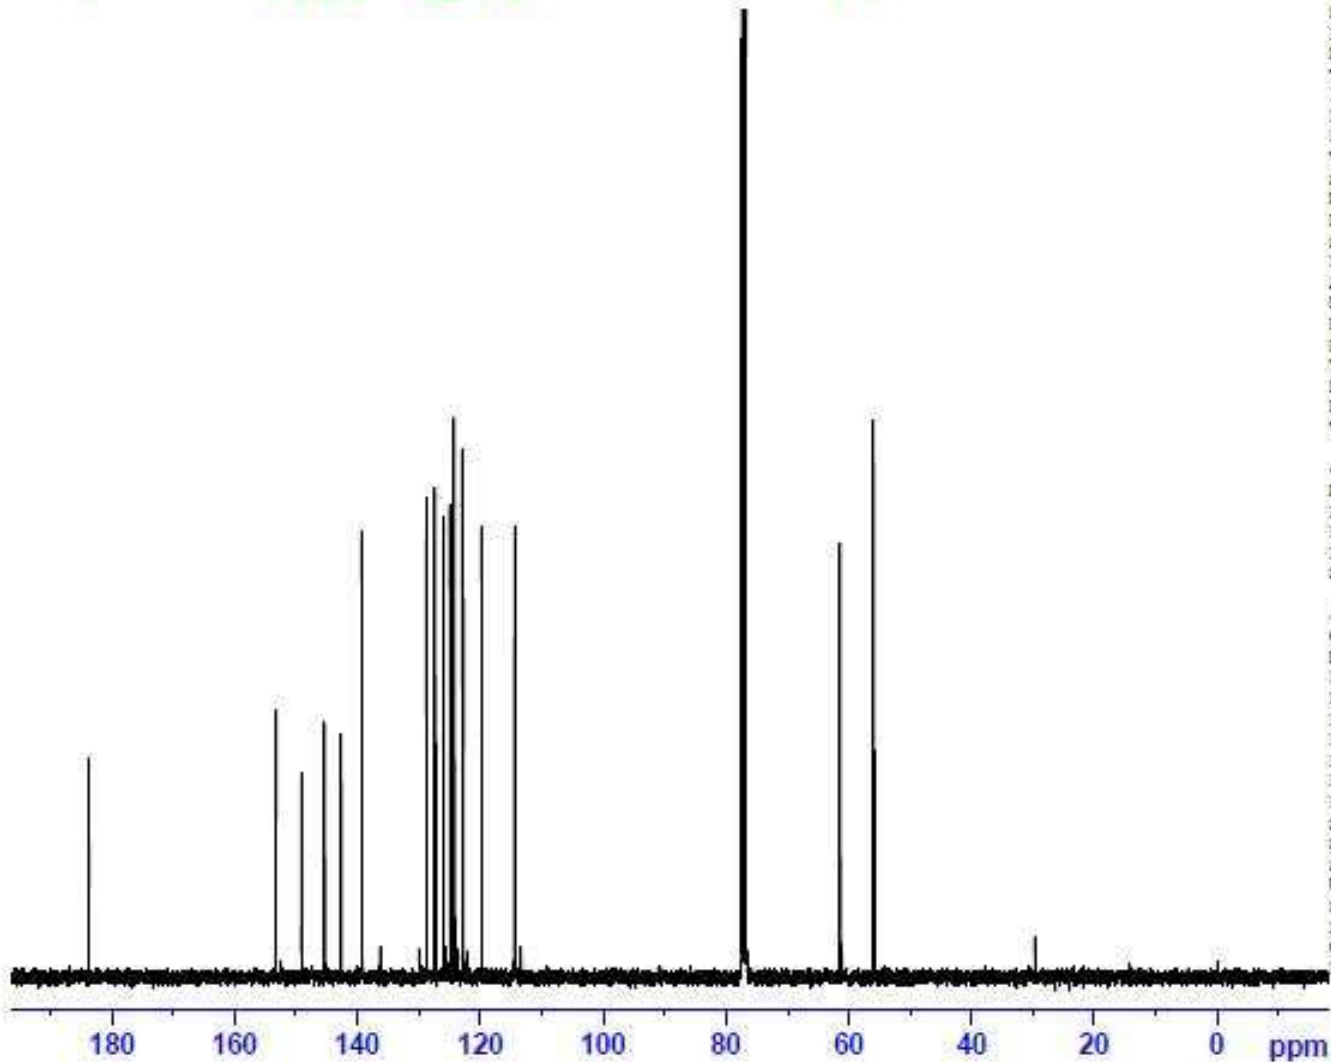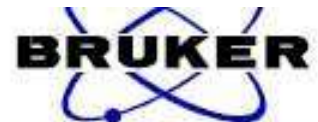

NAME Audrey Isabelle  
EXPNO 85  
PROCNO 1  
Date 20190621  
Time 9.49  
INSTRUM spect  
PROBHD 5 mm DABBO BB-  
PULPROG zgpg30  
TD 65536  
SOLVENT CDCl3  
NS 637  
DS 4  
SWH 24038.461 Hz  
FIDRES 0.366798 Hz  
AQ 1.3631988 sec  
RG 203  
DW 20.800 usec  
DE 6.50 usec  
TE 297.9 K  
D1 2.00000000 sec  
D11 0.03000000 sec  
TD0 1

----- CHANNEL f1 -----  
NUC1 13C  
P1 9.90 usec  
PL1 -1.90 dB  
PL1W 56.02249908 W  
SFO1 100.6228298 MHz

----- CHANNEL f2 -----  
CPDPRG2 waltz165  
NUC2 1H  
DCPD2 80.00 usec  
PL2 0.30 dB  
PL12 15.40 dB  
PL13 18.40 dB  
PL2W 11.25229836 W  
PL12W 0.34772930 W  
PL13W 0.17427748 W  
SFO2 400.1316005 MHz  
SI 32768  
SF 100.6127690 MHz  
WDW EM  
SSB 0  
LB 1.00 Hz  
GB 0  
PC 1.40

HRMS

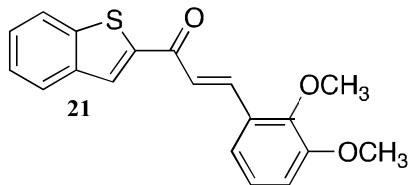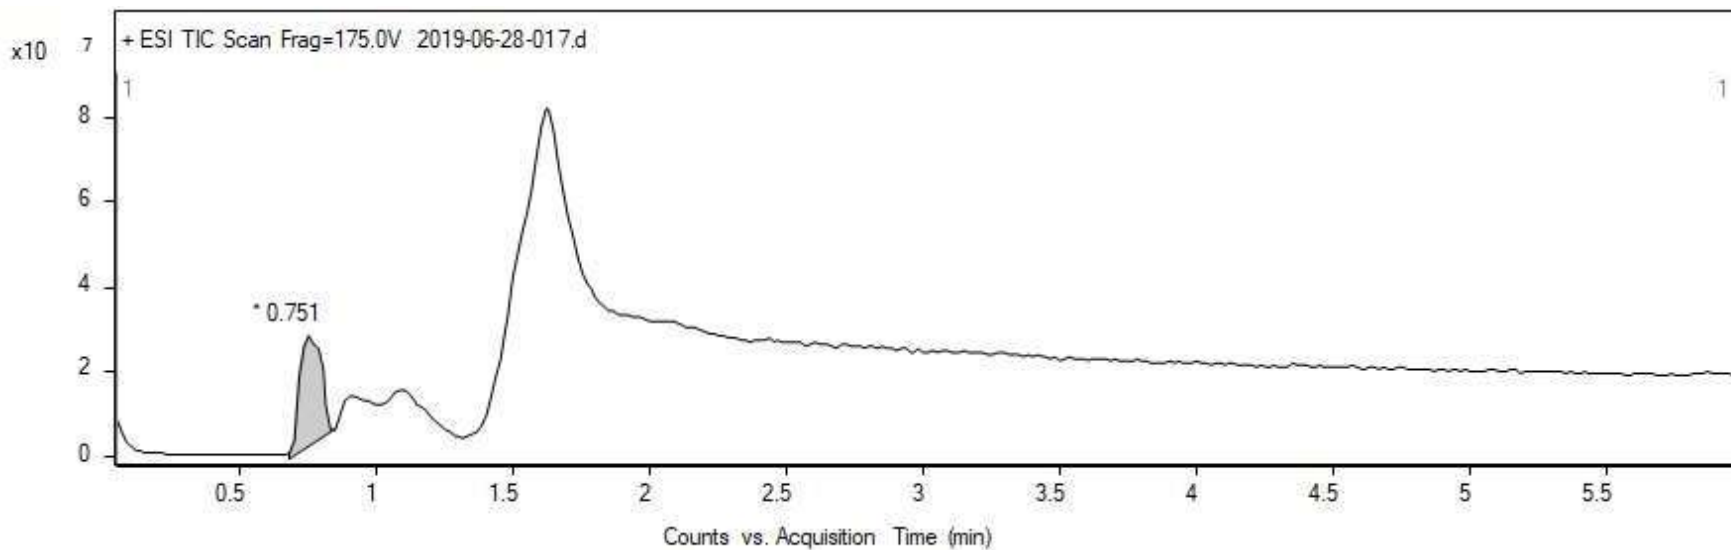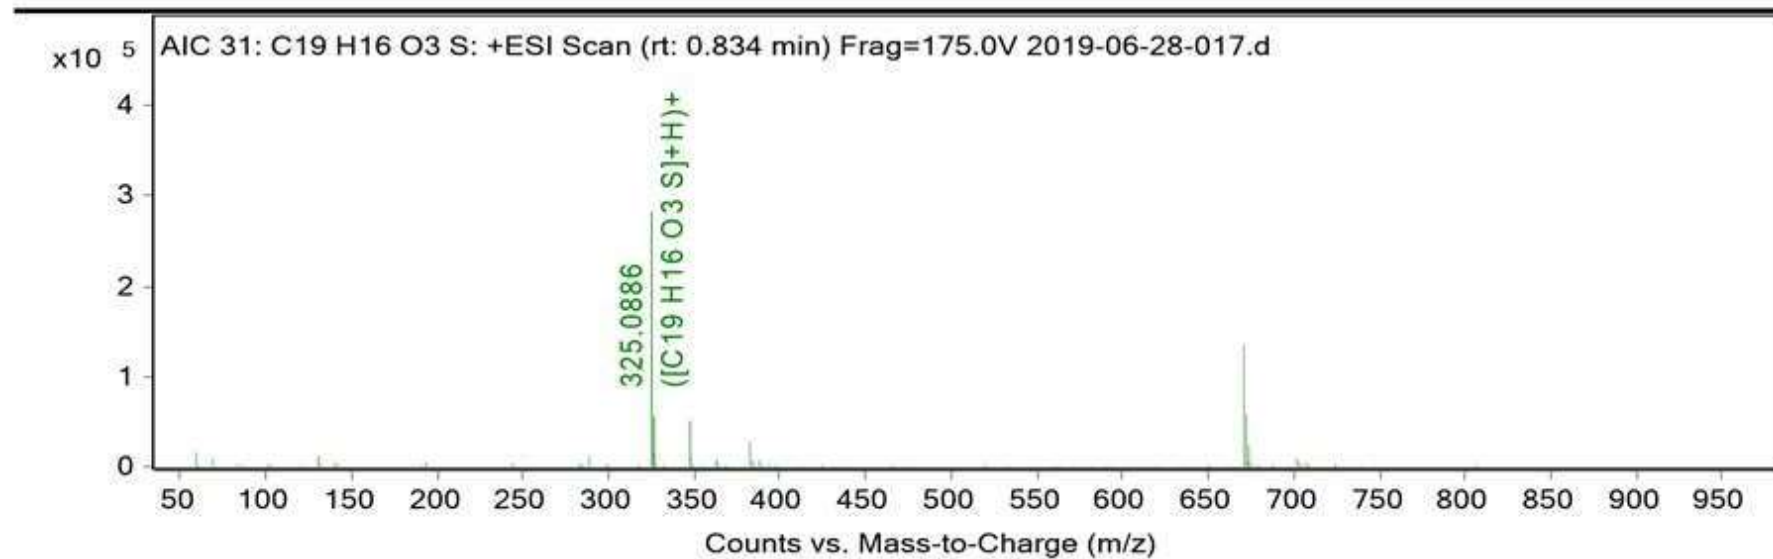

<sup>1</sup>H NMR

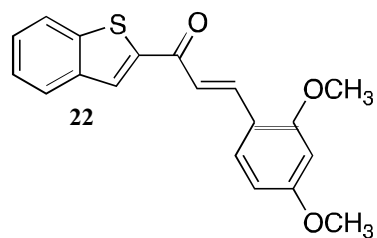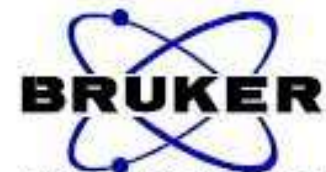

NAME Audrey Isabelle  
EXPNO 86  
PROCNO 1  
Date\_ 20190624  
Time\_ 9.10  
INSTRUM spect  
PROBHD 5 mm PABBO BH-  
PULPROG zg30  
TD 65536  
SOLVENT CDCl3  
NS 16  
DS 2  
SWH 8223.685 Hz  
FIDRES 0.125483 Hz  
AQ 3.9846387 sec  
RG 80.6  
EW 60.800 usec  
DE 6.50 usec  
TE 298.0 K  
D1 1.00000000 sec  
TD0 1

----- CHANNEL f1 -----  
NUC1 1H  
P1 14.07 usec  
PL1 0.30 dB  
PLW 11.25229836 W  
SFO1 400.1324710 MHz  
SI 32768  
SF 400.1300000 MHz  
WDW EM  
SSB 0  
LB 0.30 Hz  
GB 0  
PC 1.00

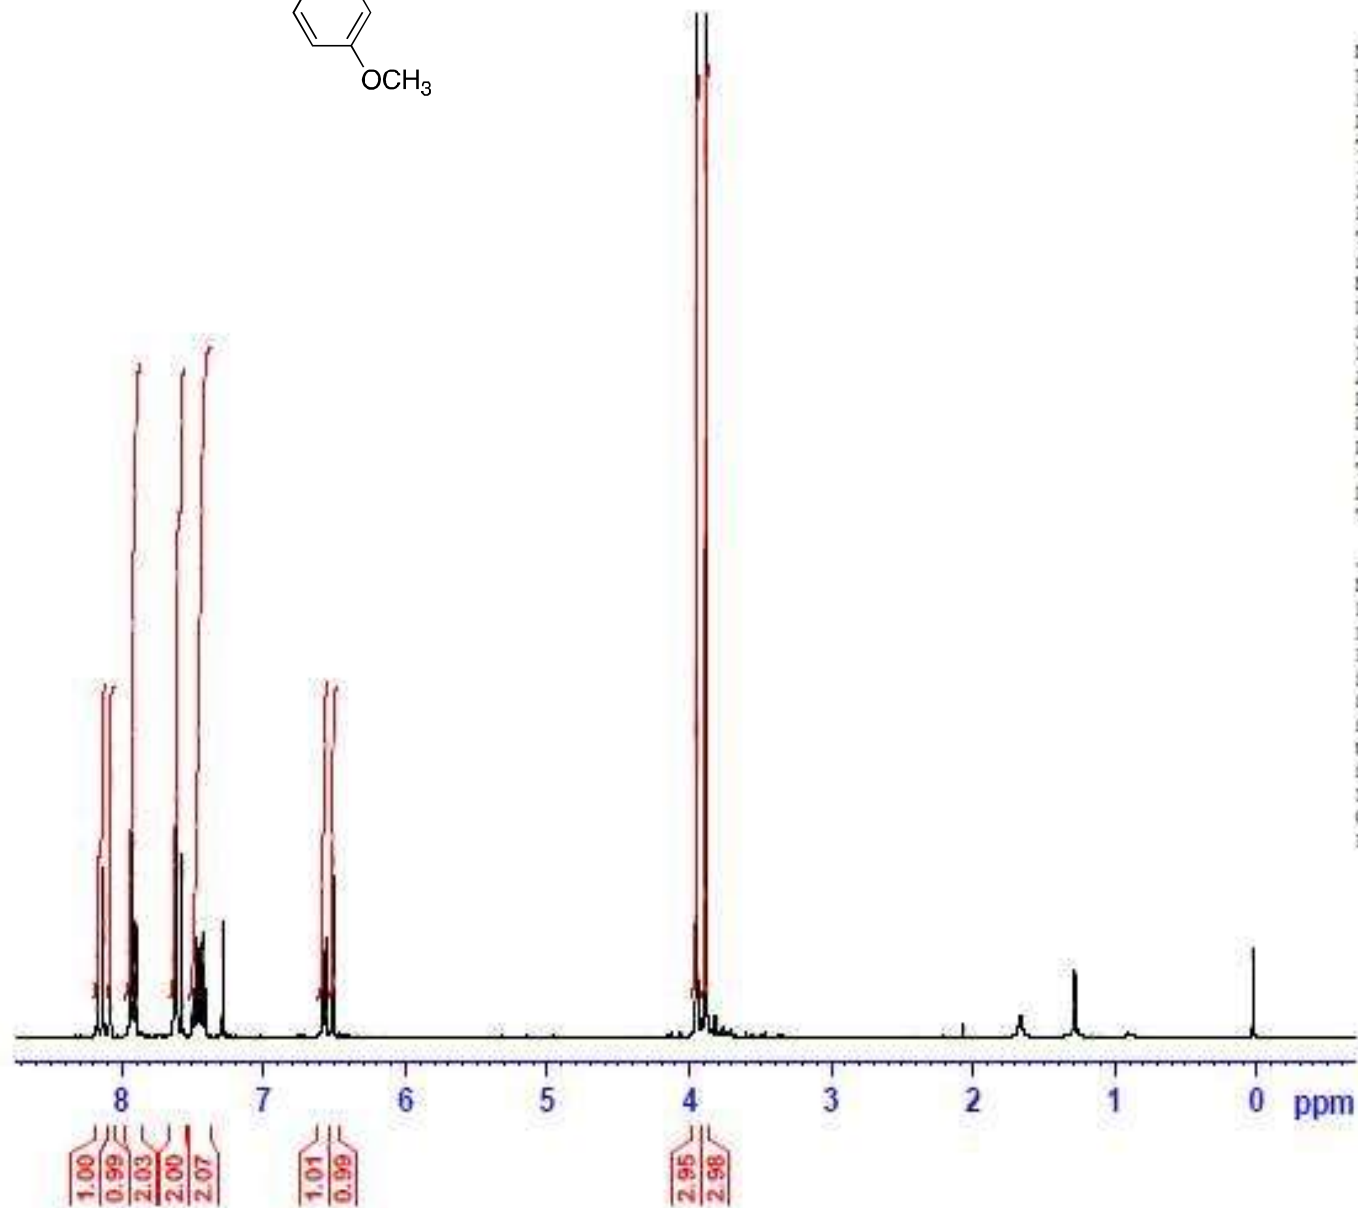

<sup>13</sup>C NMR

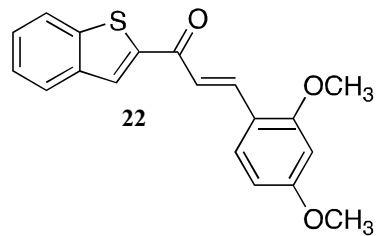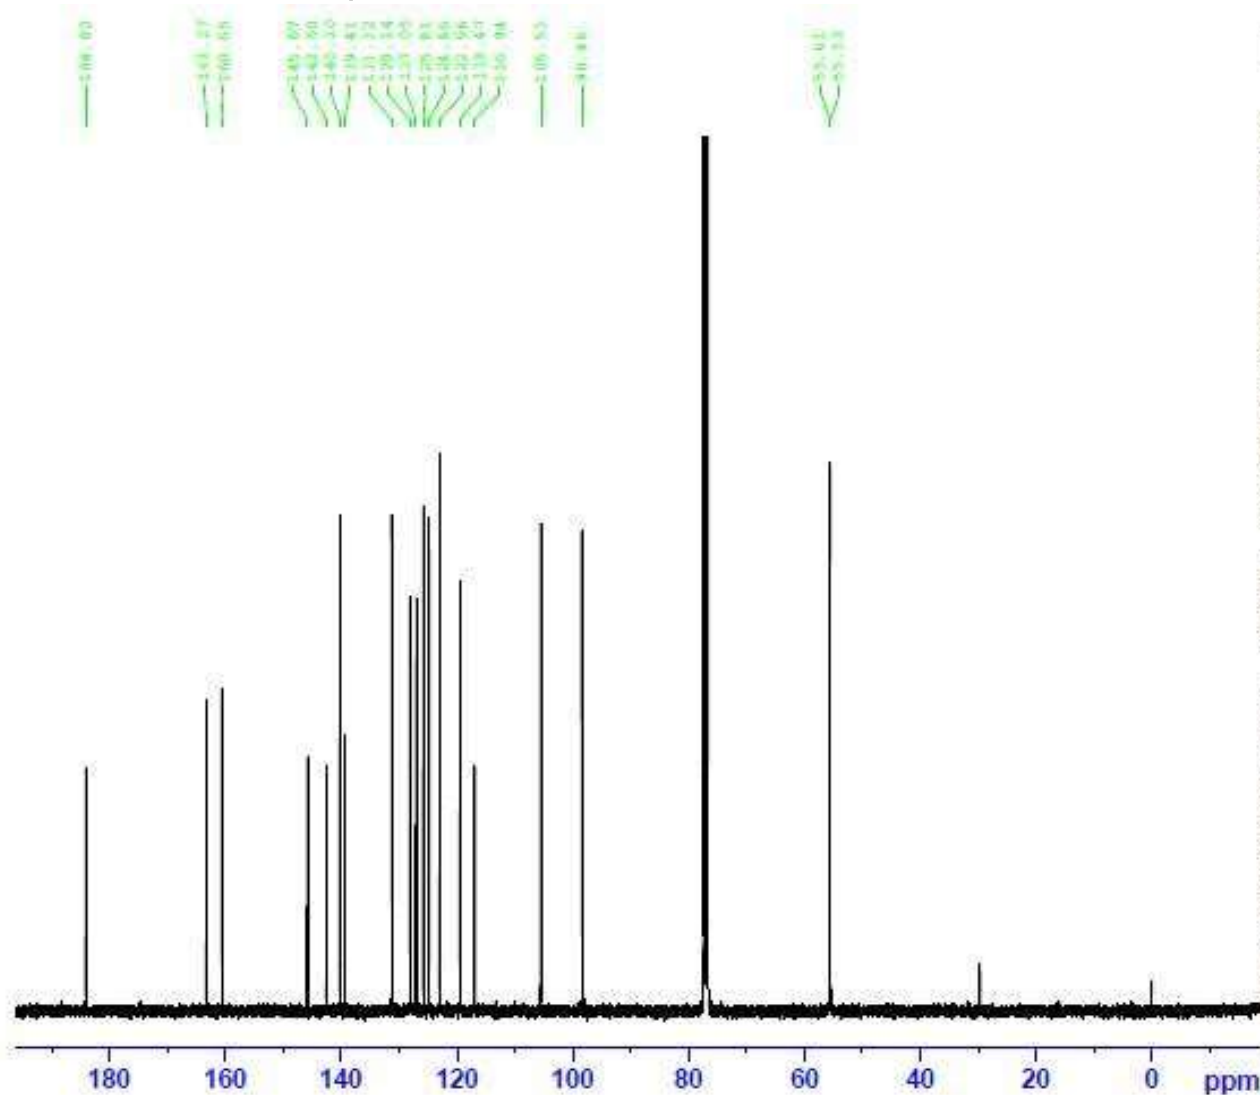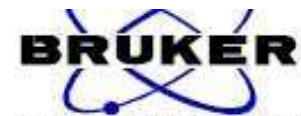

NAME Audrey Isabelle  
EXPNO 68  
PROCNO 1  
Date 20190624  
Time 11.07  
INSTRUM spect  
PROBHD 5 mm DABBO BB-  
PULPROG zgpg30  
TD 65536  
SOLVENT CDCl3  
NS 1836  
DS 4  
SWH 24038.461 Hz  
FIDRES 0.366798 Hz  
AQ 1.3631988 sec  
RG 203  
DW 20.800 usec  
DE 6.50 usec  
TE 298.0 K  
D1 2.00000000 sec  
D11 0.03000000 sec  
TDO 1

----- CHANNEL f1 -----  
NUC1 13C  
P1 9.90 usec  
PL1 -1.90 dB  
PL1W 56.02249908 W  
SFO1 100.6228298 MHz

----- CHANNEL f2 -----  
CPDPRG2 waltz65  
NUC2 1H  
PCPD2 80.00 usec  
PL2 0.30 dB  
PL12 15.40 dB  
PL13 18.40 dB  
PL2W 11.25229836 W  
PL12W 0.34772930 W  
PL13W 0.17427748 W  
SFO2 400.1316005 MHz  
SI 32768  
SF 100.6127690 MHz  
WDW EM  
SSB 0  
LB 1.00 Hz  
GB 0  
PC 1.40

HRMS

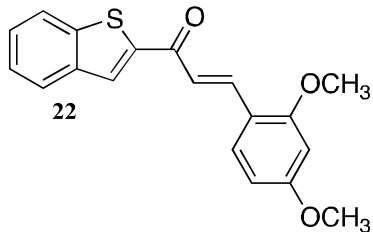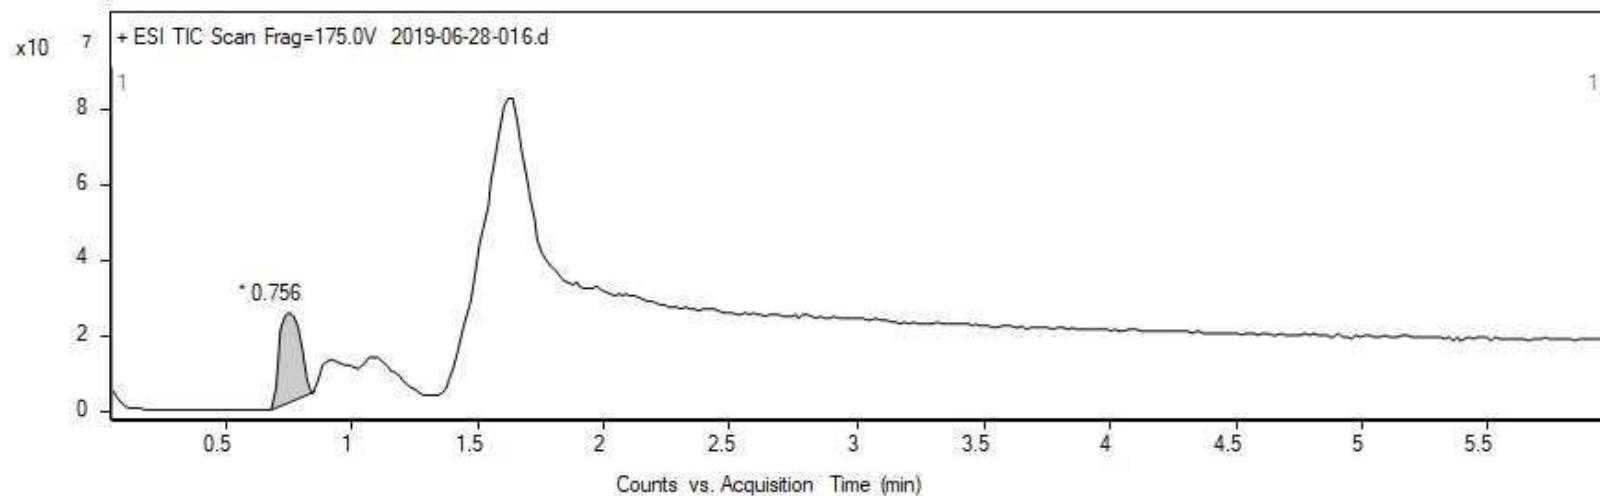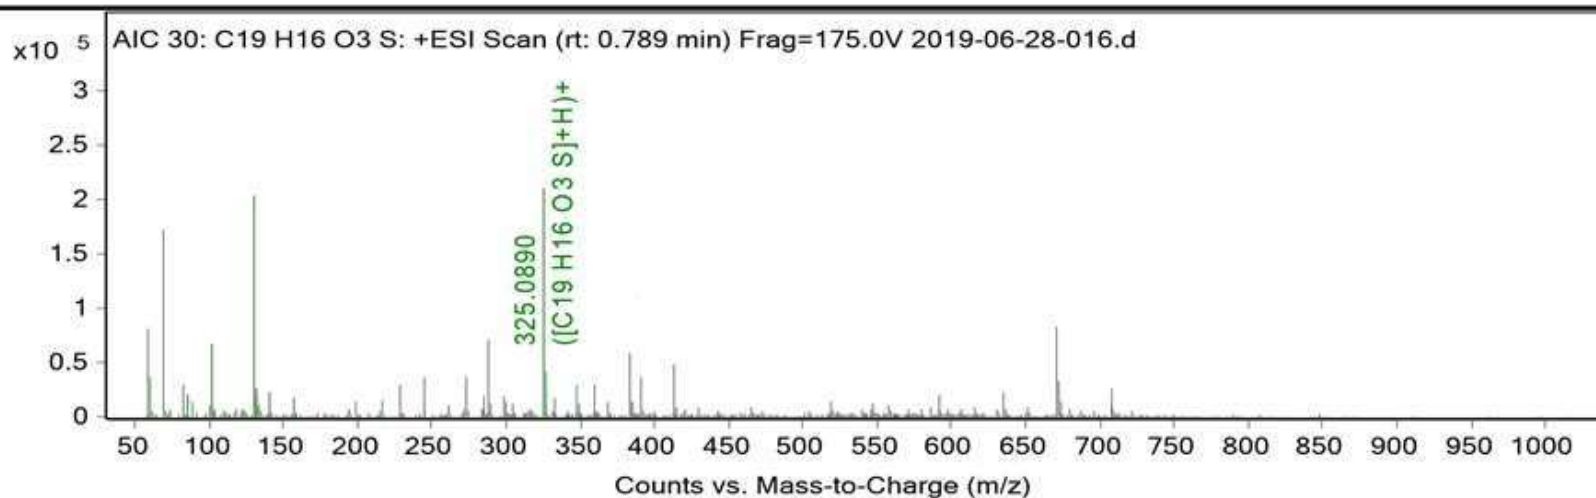



<sup>1</sup>H NMR

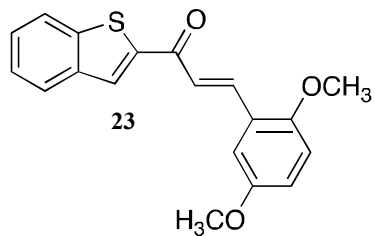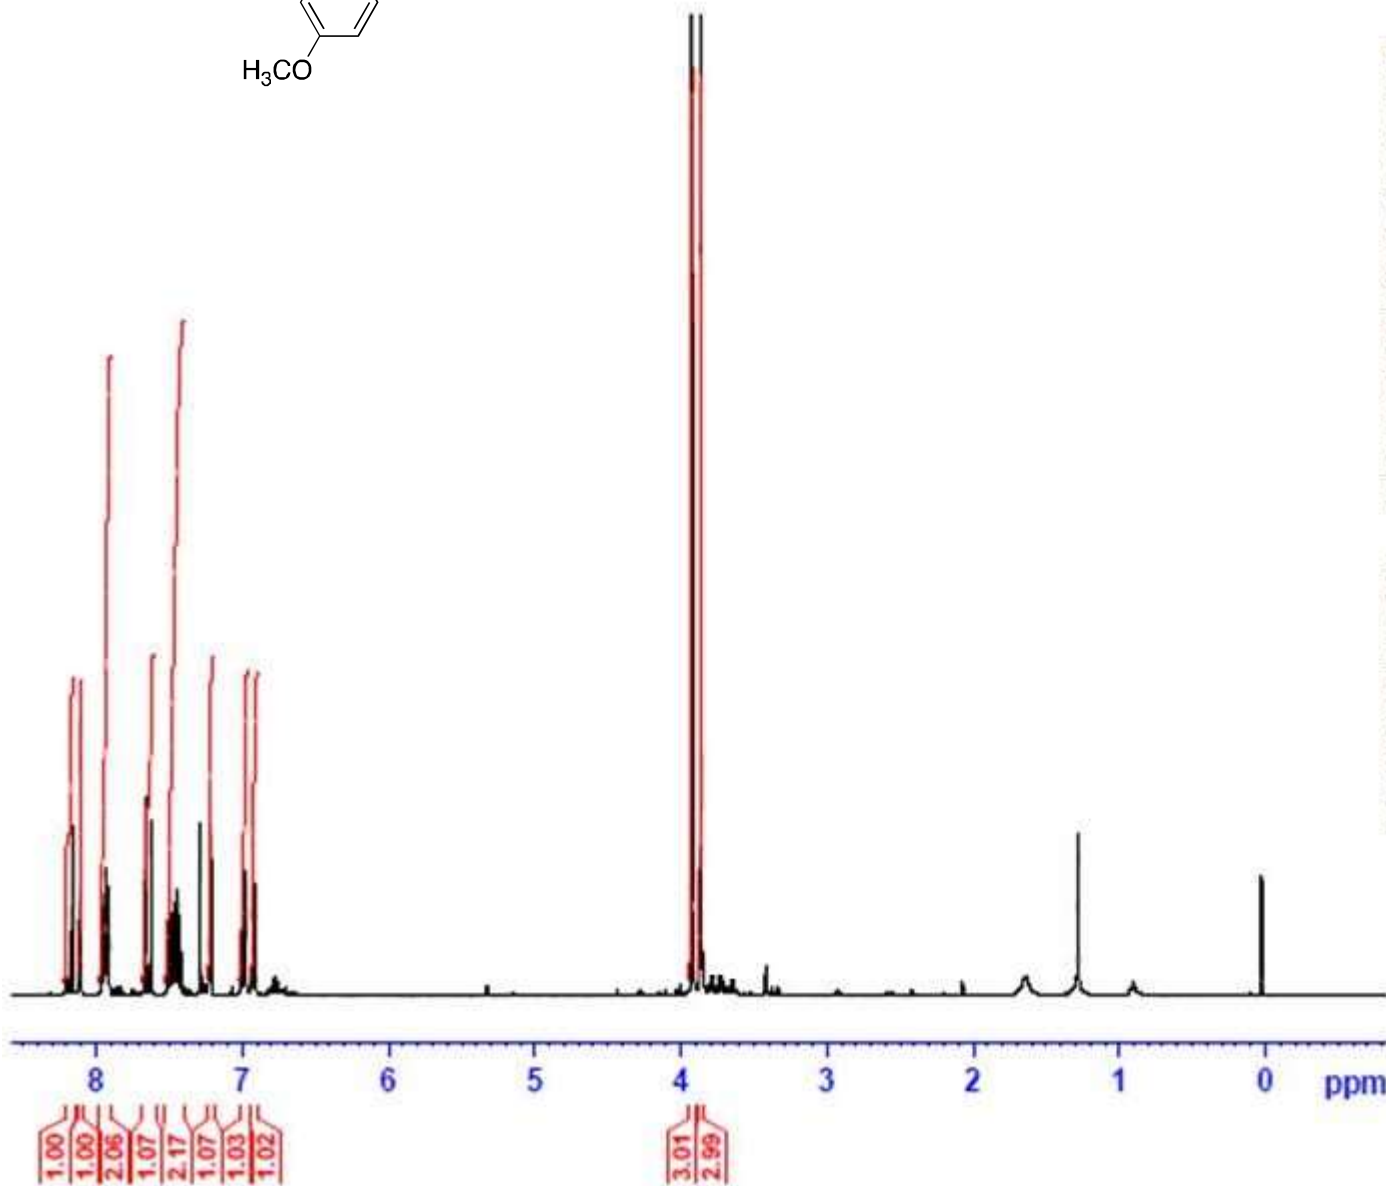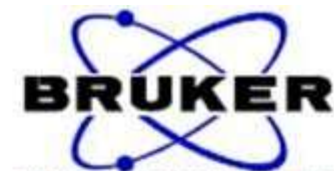

```
NAME Audrey Isabelle
EXPNO 78
PROCNO 1
Date_ 20190619
Time 15.23
INSTRUM spect
PROBHD 5 mm DABBO BB-
PULPROG zg30
TD 65536
SOLVENT CDCl3
NS 16
DS 2
SWH 8223.685 Hz
FIDRES 0.125483 Hz
AQ 3.9846387 sec
RG 90.5
RW 60.800 usec
DE 6.50 usec
TE 298.0 K
D1 1.00000000 sec
TDO 1
```

```
----- CHANNEL f1 -----
NUC1 1H
P1 14.07 usec
PL1 0.30 dB
PL1W 11.25229836 W
SP01 400.1324710 MHz
SI 32768
SF 400.1300000 MHz
WDW RM
SSB 0
LB 0.30 Hz
GB 0
PC 1.00
```



<sup>13</sup>C NMR

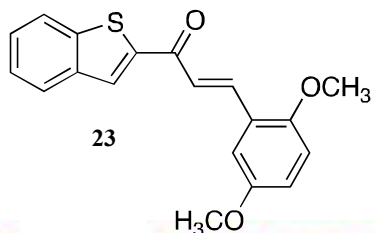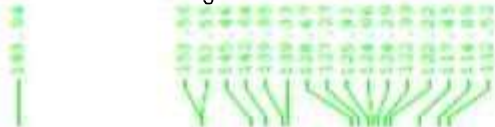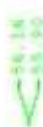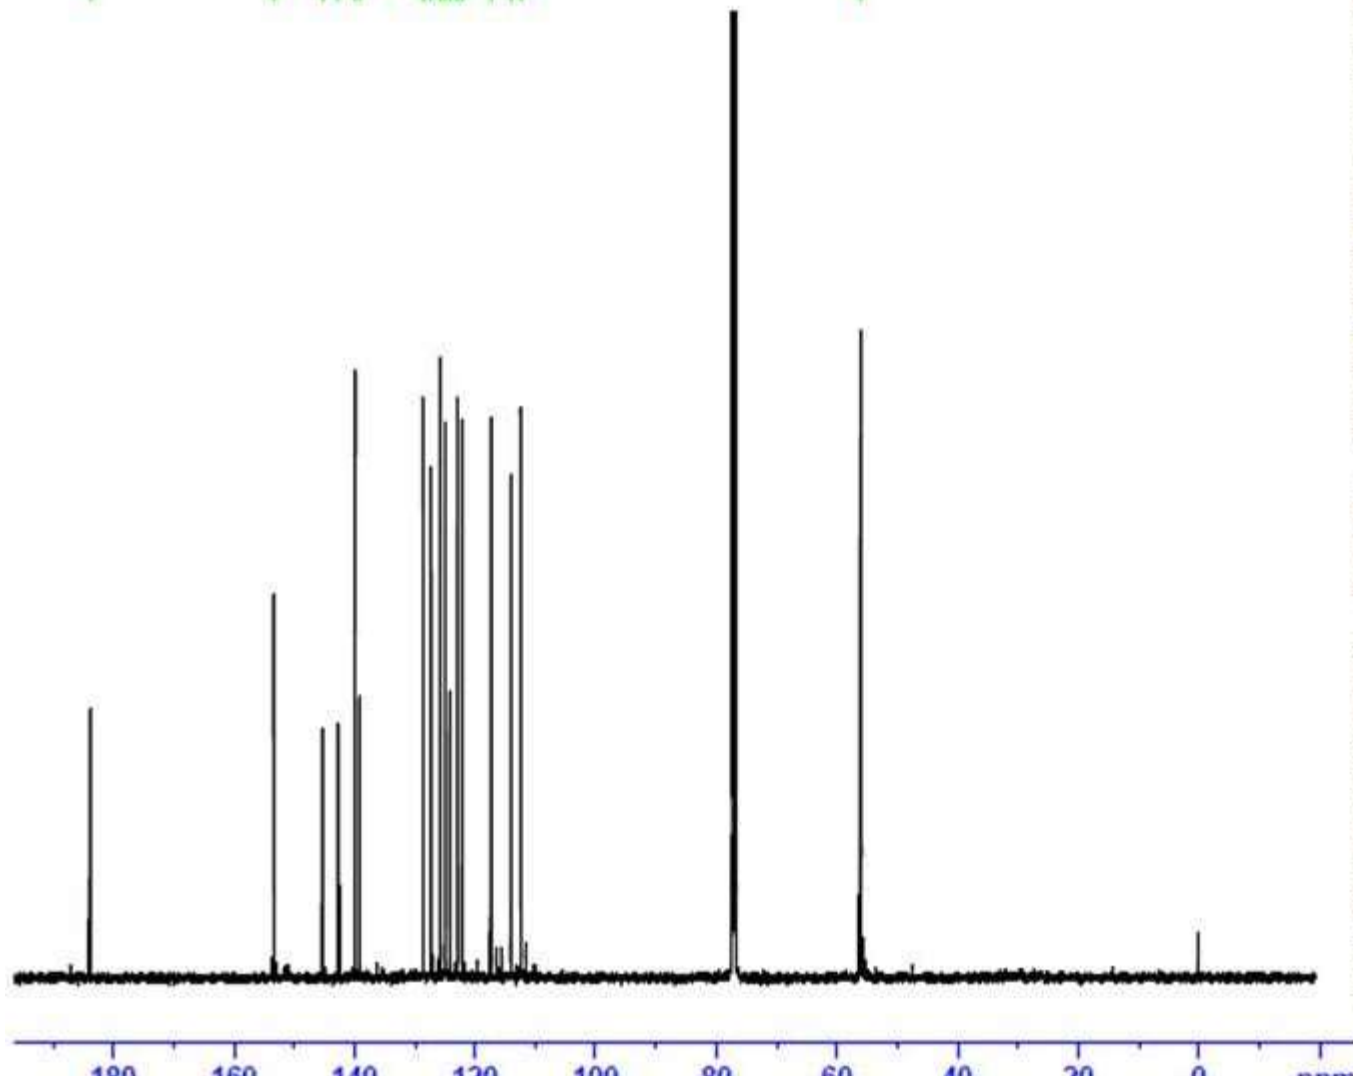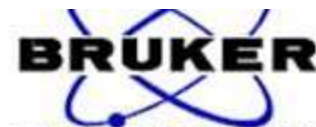

NAME Audrey Isabelle  
EXPNO 80  
PROCNO 1  
Date\_ 20190620  
Time 1.06  
INSTRUM spect  
PROBHD 5 mm DABBO SB-  
PULPROG zgpg30  
TD 65536  
SOLVENT CDCl3  
NS 10000  
DS 4  
SWH 24038.461 Hz  
FIDRES 0.366798 Hz  
AQ 1.3631988 sec  
RG 203  
DW 20.800 usec  
DE 6.50 usec  
TE 298.0 K  
D1 2.00000000 sec  
D11 0.03000000 sec  
TD0 1

----- CHANNEL f1 -----  
NUC1 13C  
P1 9.90 usec  
PL1 -1.90 dB  
PL1W 56.02249908 W  
SFO1 100.6228298 MHz

----- CHANNEL f2 -----  
CDDPRG2 waltz65  
NUC2 1H  
PCPD2 80.00 usec  
PL2 0.30 dB  
PL12 15.40 dB  
PL13 18.40 dB  
PL2W 11.25229836 W  
PL12W 0.34772930 W  
PL13W 0.17427748 W  
SFO2 400.1316005 MHz  
SI 32768  
SF 100.6127690 MHz  
WDW EM  
SSB 0  
LB 1.00 Hz  
CB 0  
PC 1.40

HRMS

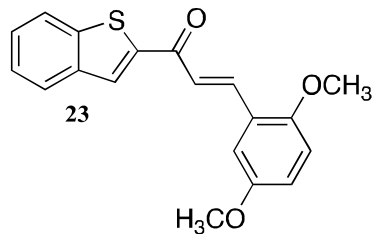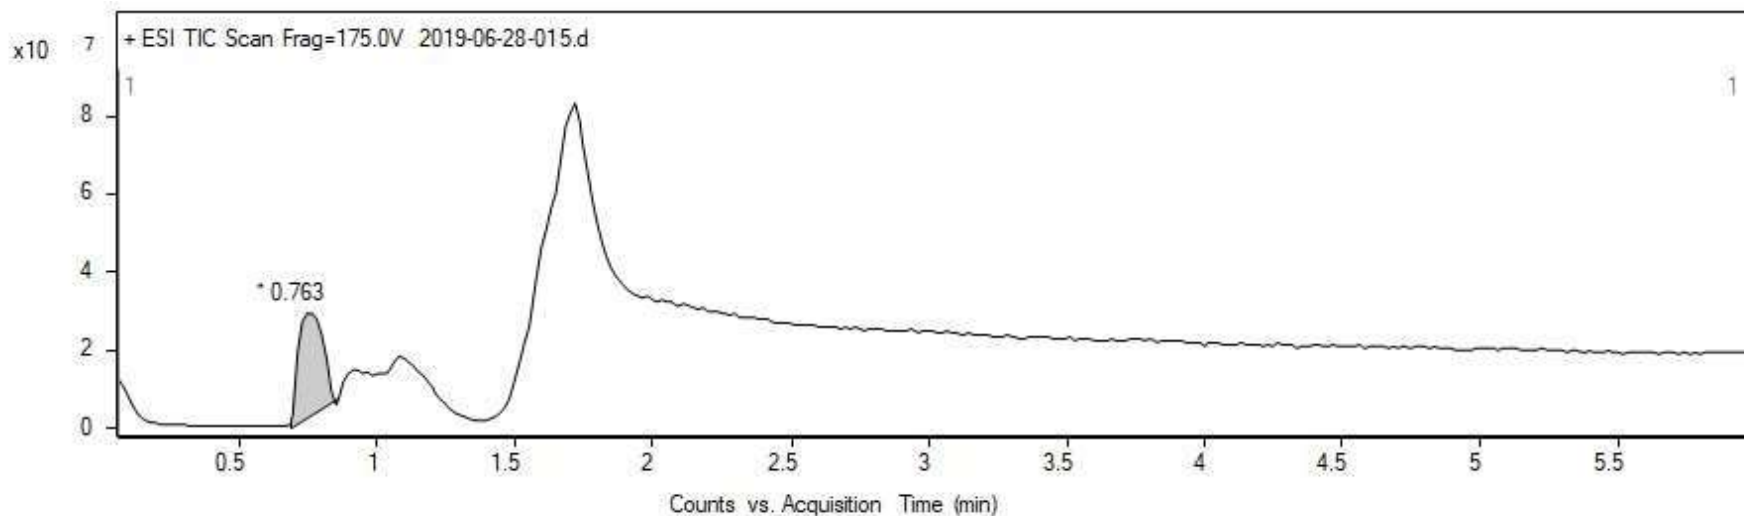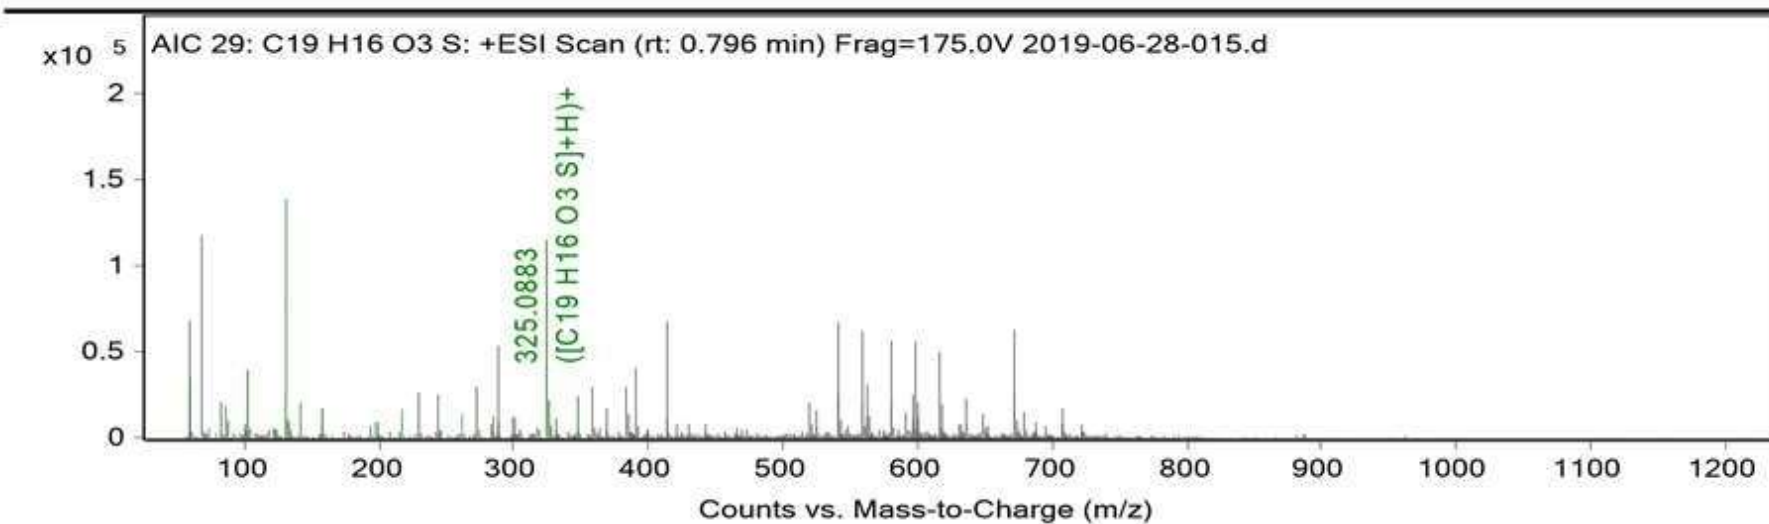

<sup>1</sup>H NMR

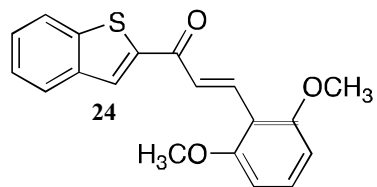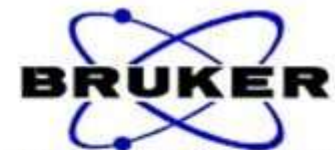

NAME Audrey Isabelle  
EXPNO 38  
PROCNO 1  
Date\_ 20190527  
Time\_ 16.36  
INSTRUM spect  
PROBHD 5 mm PARBO BB-  
PULPROG zg30  
TD 65536  
SOLVENT CDCl3  
NS 16  
DS 2  
SWH 8223.685 Hz  
FIDRES 0.125483 Hz  
AQ 3.9846387 sec  
RG 128  
DW 60.800 usec  
DE 6.50 usec  
TE 298.0 K  
D1 1.00000000 sec  
TD0 1

----- CHANNEL f1 -----  
NUC1 1H  
P1 14.07 usec  
PL1 0.30 dB  
PL1W 11.25229836 W  
SFO1 400.1324710 MHz  
SI 32768  
SF 400.1300000 MHz  
WDW EM  
SSB 0  
LB 0.30 Hz  
GB 0  
PC 1.00

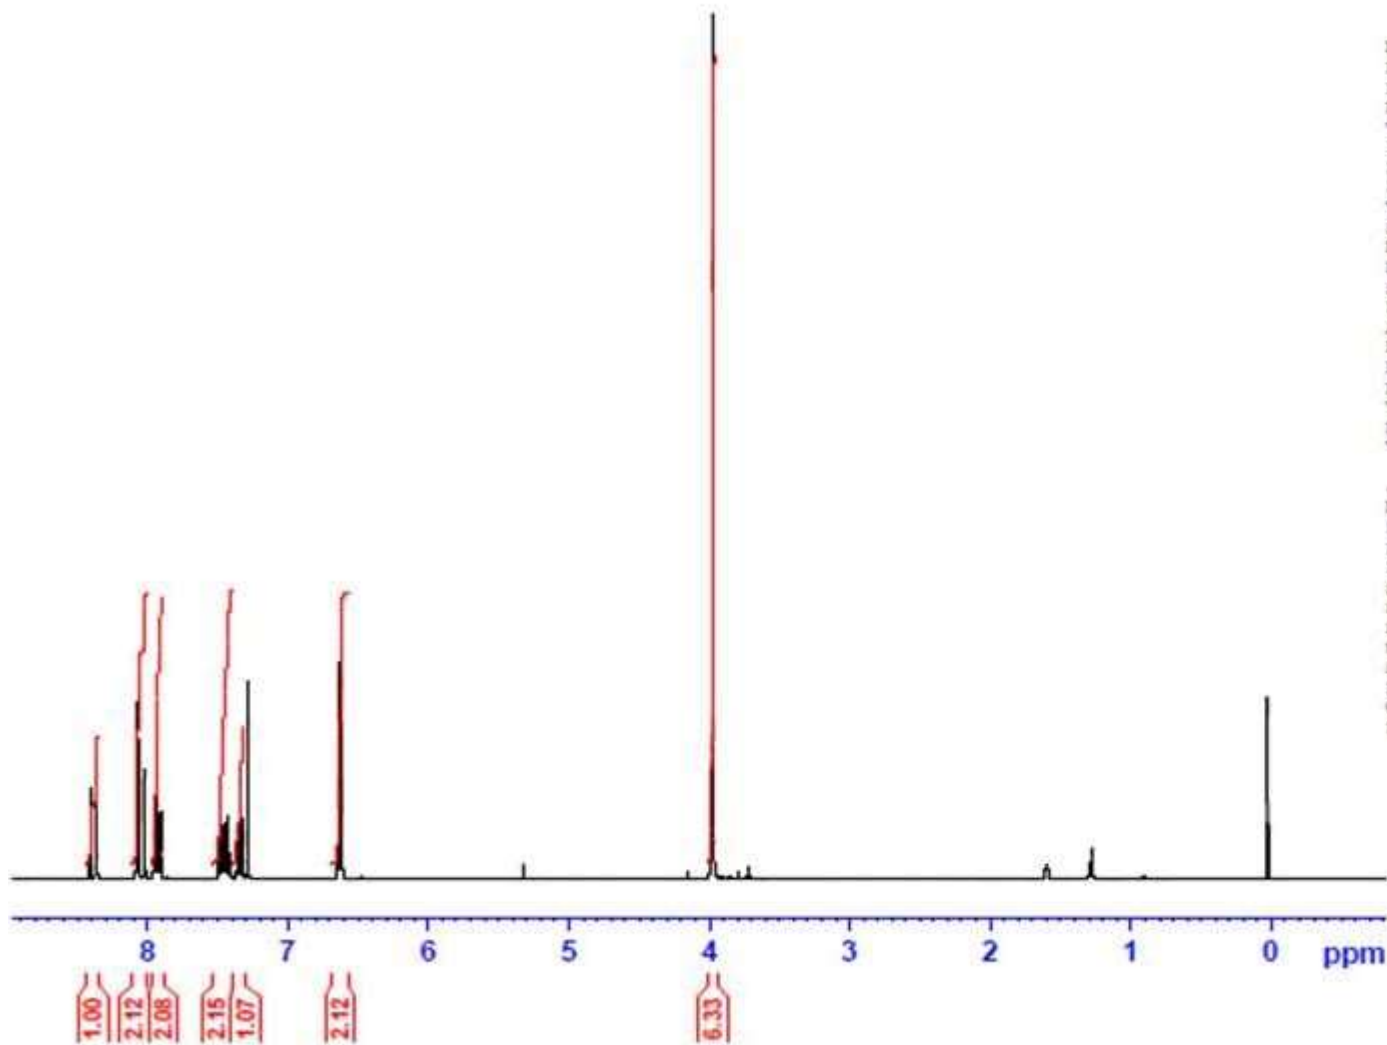

<sup>13</sup>C NMR

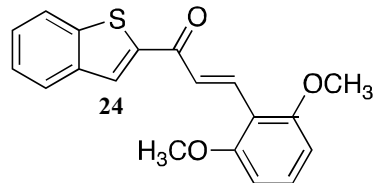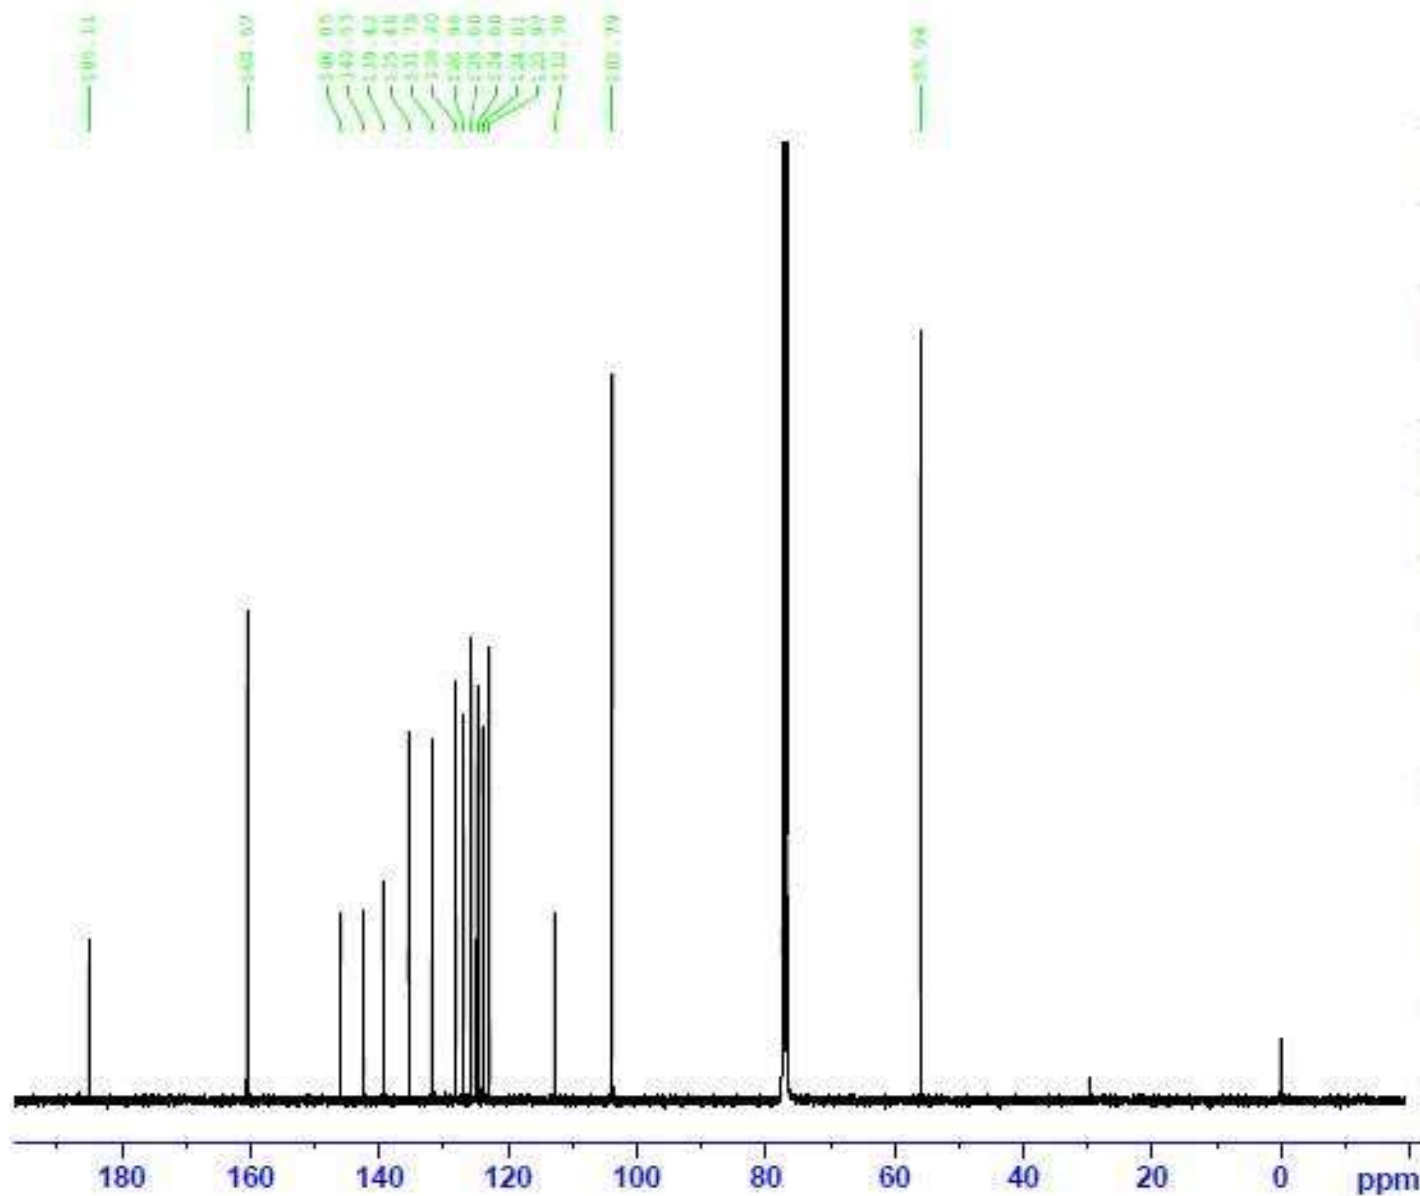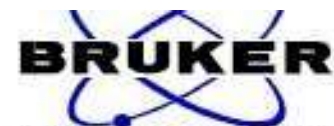

NAME Audrey Isabelle  
EKPNO 40  
PROCNO 1  
Date\_ 20190528  
Time 2.11  
INSTRUM spect  
PROBHD 5 mm DABBO BB-  
PULPROG zgpg30  
TD 65536  
SOLVENT CDCl3  
NS 10000  
DS 4  
SWH 24038.461 Hz  
FIDRES 0.366798 Hz  
AQ 1.3631988 sec  
RG 203  
EW 20.800 usec  
DE 6.50 usec  
TE 298.0 K  
D1 2.00000000 sec  
D11 0.03000000 sec  
TD0 1

----- CHANNEL f1 -----  
NUC1 13C  
P1 9.90 usec  
PL1 -1.90 dB  
PL1W 56.02249908 W  
SFO1 100.6228298 MHz

----- CHANNEL f2 -----  
CPDPRG2 waltz65  
NUC2 1H  
PCPD2 80.00 usec  
PL2 0.30 dB  
PL12 15.40 dB  
PL13 18.40 dB  
PL2W 11.25229836 W  
PL12W 0.34772930 W  
PL13W 0.17427748 W  
SFO2 400.1316005 MHz  
SI 32768  
SF 100.6127690 MHz  
WDW EM  
SSB 0  
LB 1.00 Hz  
GB 0  
PC 1.40

HRMS

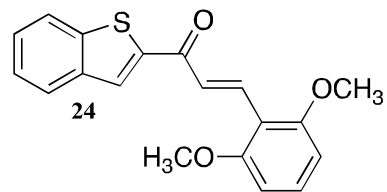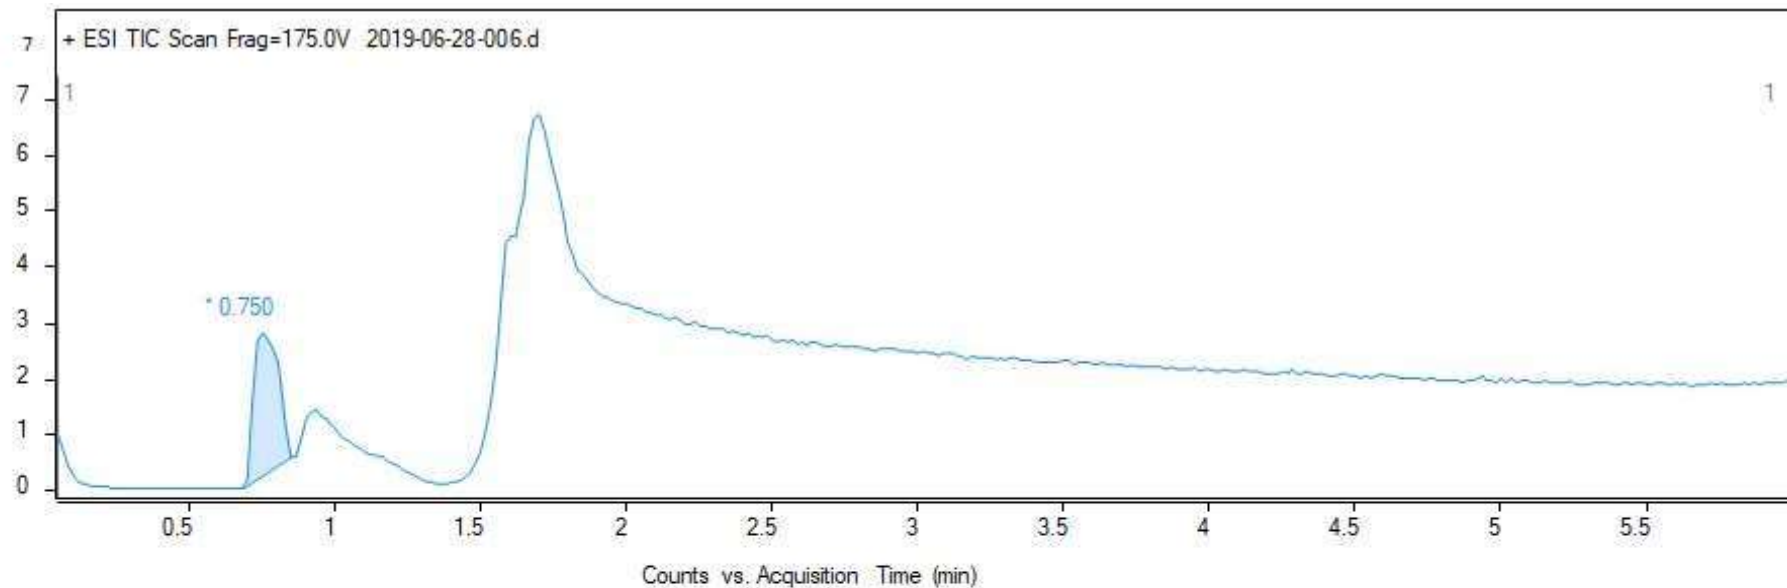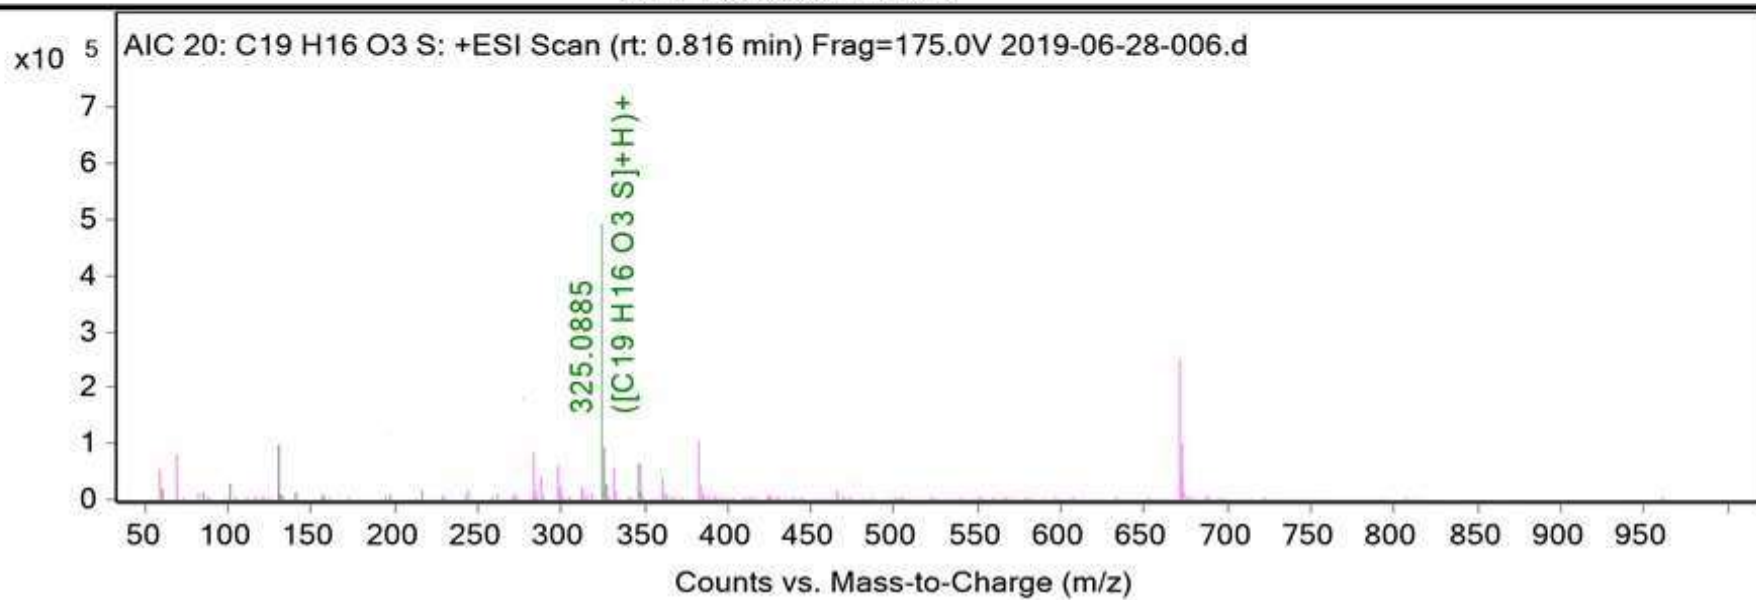

<sup>1</sup>H NMR

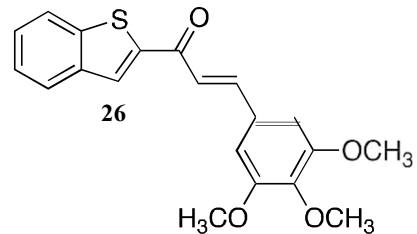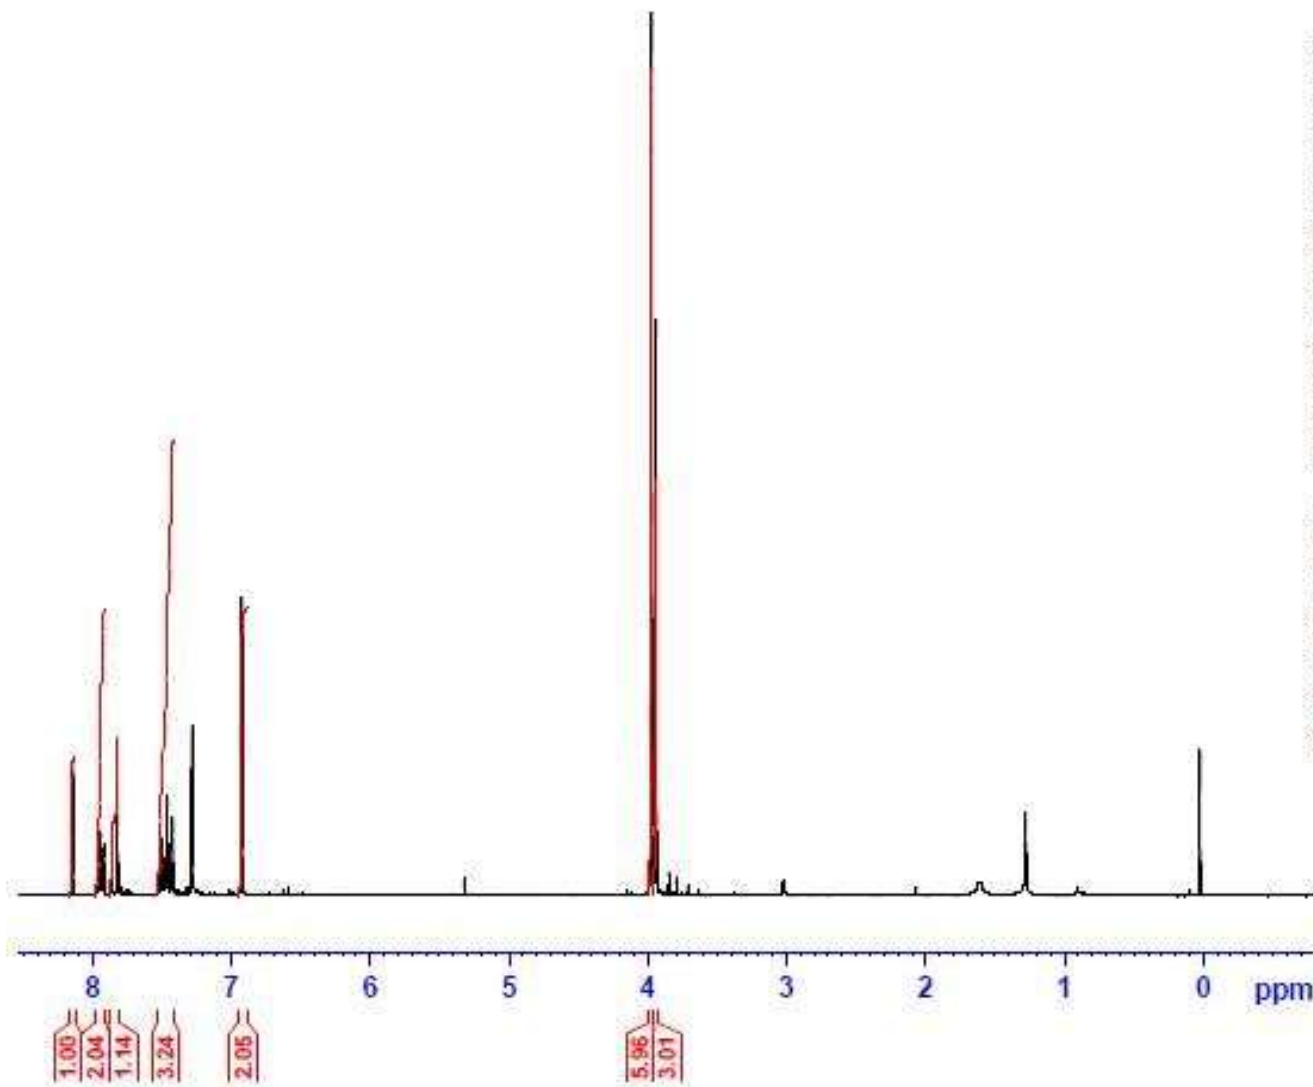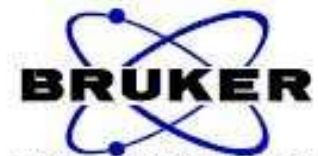

NAME Audrey Isabelle  
EXPNO 62  
PROCNO 1  
Date\_ 20190612  
Time 8.58  
INSTRUM spect  
PROBHD 5 mm DSSBO BB-  
PULPROG zg30  
TD 65536  
SOLVENT CDCl3  
NS 16  
DS 2  
SWH 8223.685 Hz  
FIDRES 0.125483 Hz  
AQ 3.9846387 sec  
RG 114  
IW 60.800 usec  
DE 6.50 usec  
TE 298.0 K  
D1 1.00000000 sec  
TD0 1

----- CHANNEL f1 -----  
NUC1 1H  
P1 14.07 usec  
PL1 0.30 dB  
PL1W 11.25229836 W  
SFO1 400.1324710 MHz  
SI 32768  
SF 400.1300000 MHz  
WDW EM  
SSB 0  
LB 0.30 Hz  
GB 0  
DC 1.00

<sup>13</sup>C NMR

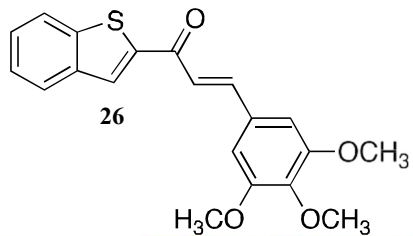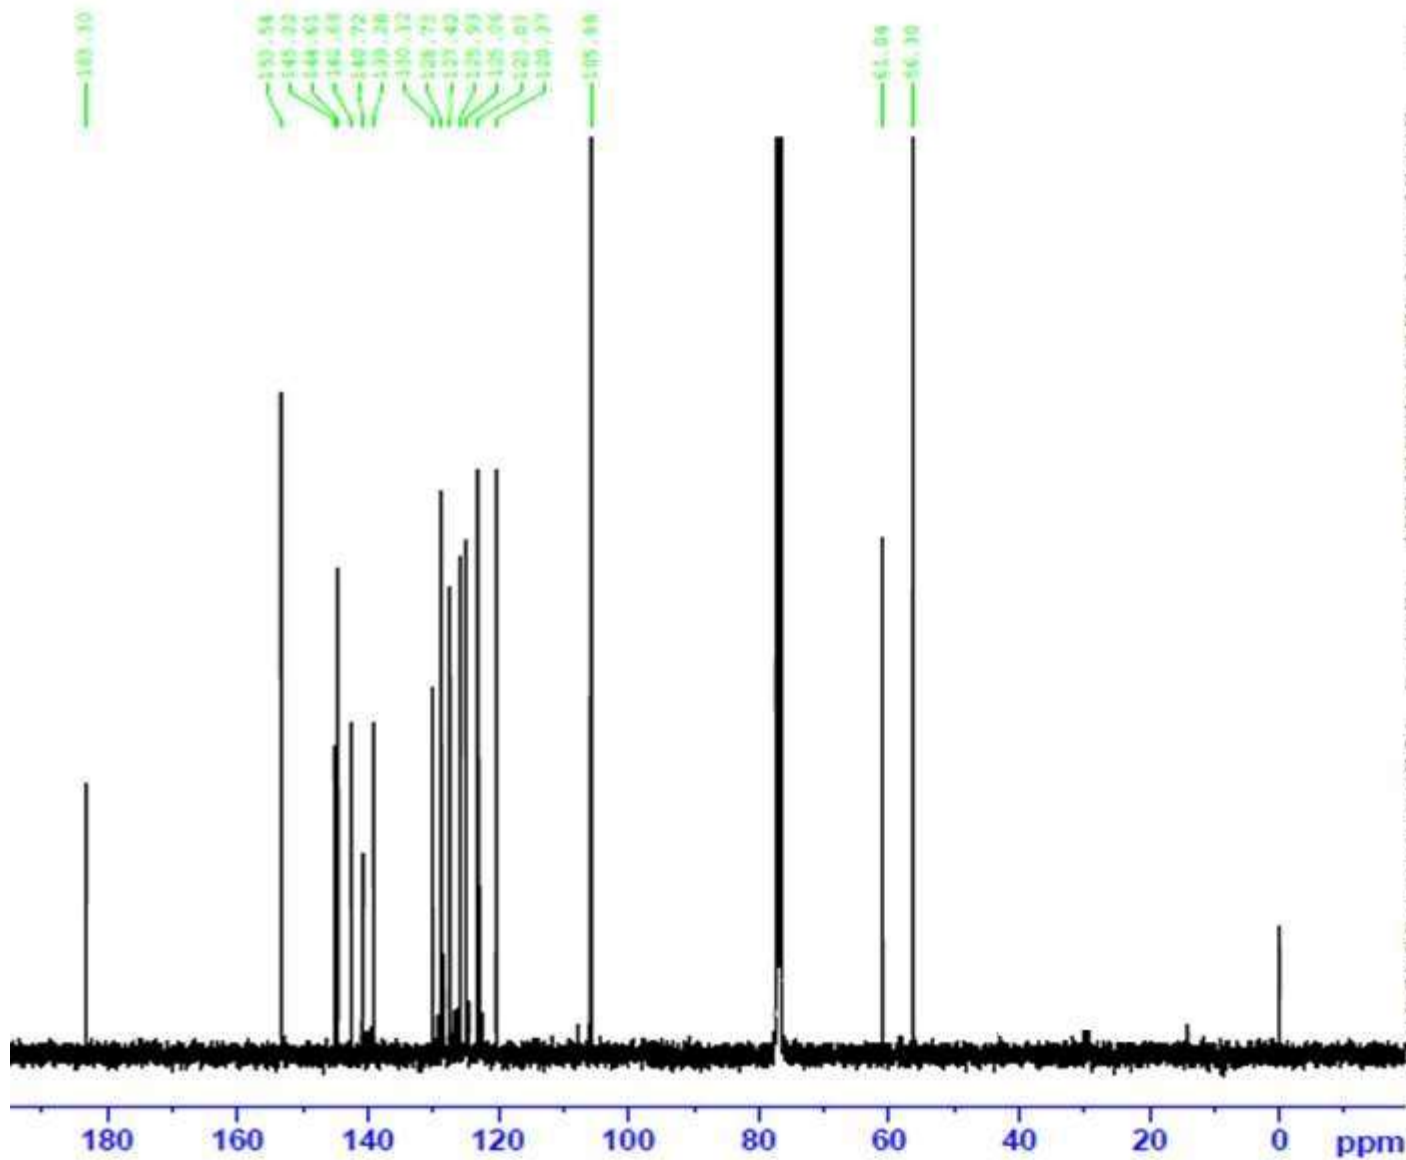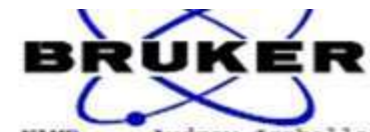

```
NAME Audrey Isabelle
EXPNO 64
PROCNO 1
Date_ 20190612
Time 14.36
INSTRUM spect
PROBHD 5 mm DASSO BR-
PULPROG zgpg30
TD 65536
SOLVENT CDCl3
NS 5397
DS 4
SWH 24038.461 Hz
FIDRES 0.366798 Hz
AQ 1.3631988 sec
RC 203
DW 20.800 usec
DE 6.50 usec
TE 298.0 K
D1 2.00000000 sec
D11 0.03000000 sec
TD0 1

----- CHANNEL f1 -----
NUC1 13C
P1 9.90 usec
PL1 -1.90 dB
PL1W 56.02249908 W
SFO1 100.6228298 MHz

----- CHANNEL f2 -----
CPDPRG2 waltz65
NUC2 1H
PCPD2 80.00 usec
PL2 0.30 dB
PL12 15.40 dB
PL13 18.40 dB
PL1W 11.25229836 W
PL12W 0.34772930 W
PL13W 0.17427748 W
SFO2 400.1316005 MHz
SI 32768
SF 100.6127690 MHz
WDW EM
SSB 0
LB 1.00 Hz
GB 0
PC 1.40
```



HRMS

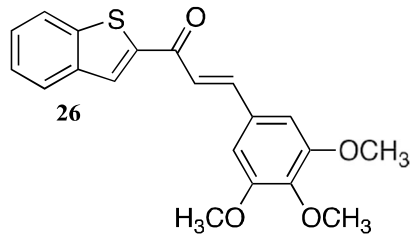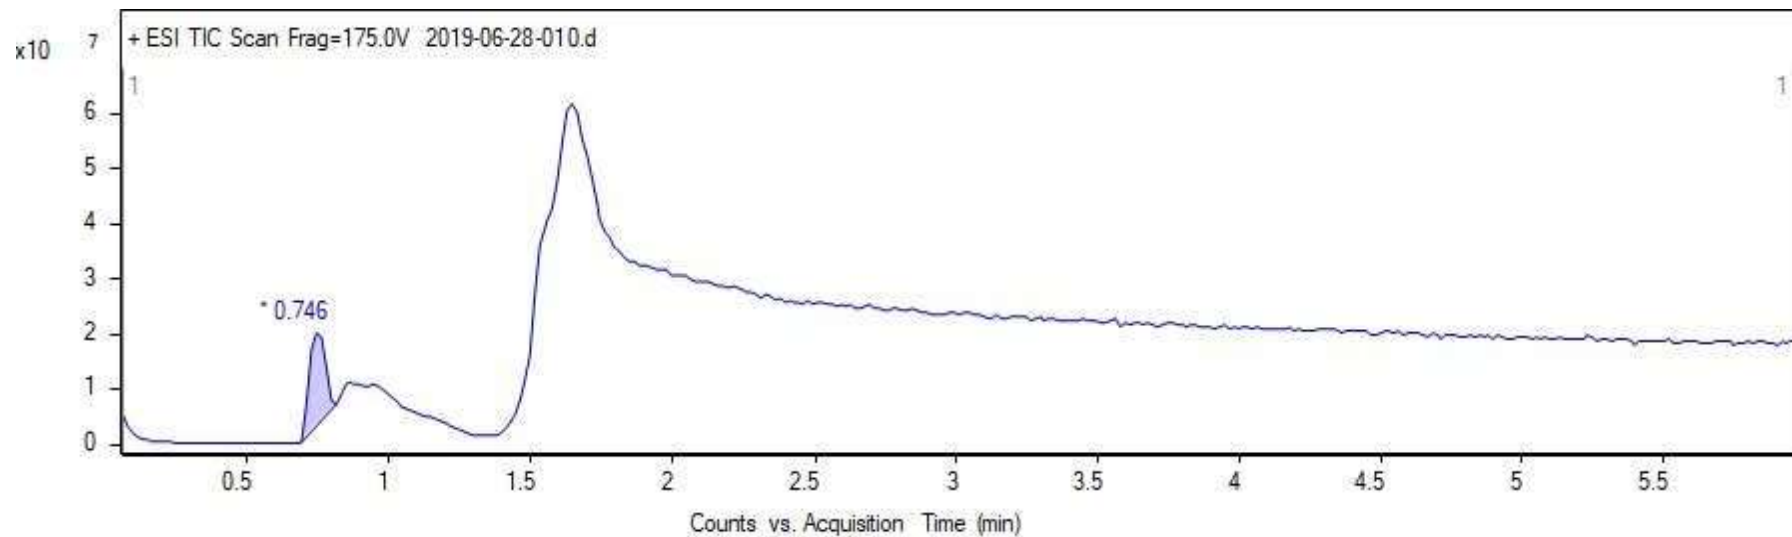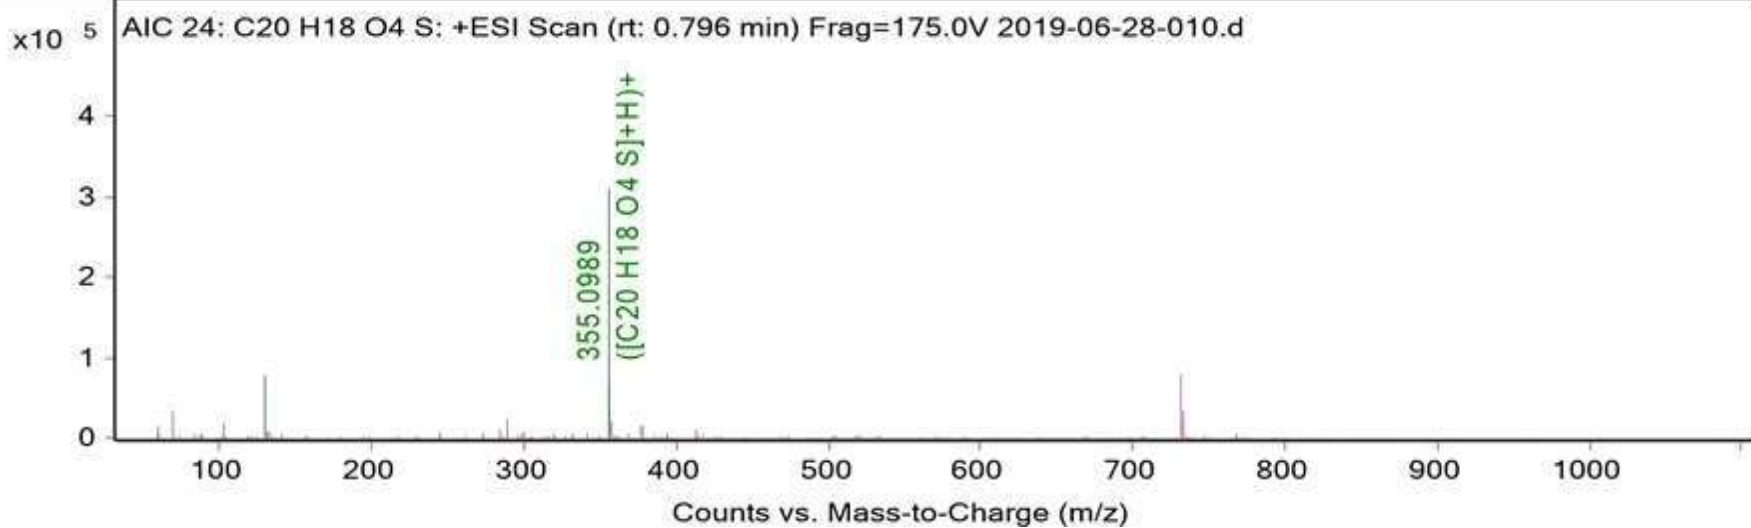



<sup>1</sup>H NMR

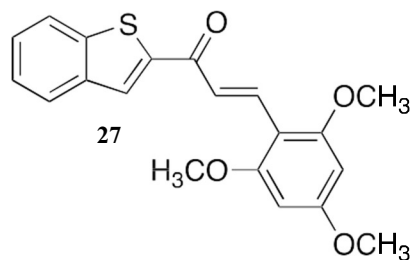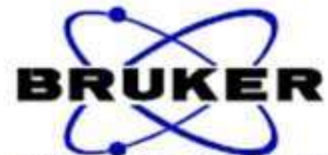

```
NAME      Audrey Isabelle
EXPNO     65
PROCNO    1
Date_     20190612
Time      14.44
INSTRUM   spect
PROBHD    5 mm DABBO BB-
PULPROG   zg30
TD        65536
SOLVENT   CDCl3
NS        16
DS        2
SWH       8223.685 Hz
FIDRES    0.125483 Hz
AQ        3.9846387 sec
RG        101
DM        60.800 usec
DE        6.50 usec
TE        298.0 K
D1        1.00000000 sec
TD0       1
```

```
----- CHANNEL f1 -----
NUC1      1H
P1        14.07 usec
PL1       0.30 dB
PL1W      11.25229836 W
SFO1      400.1324710 MHz
SI        32768
SF        400.1300000 MHz
WDW       RM
SSB       0
LB        0.30 Hz
GB        0
PC        1.00
```

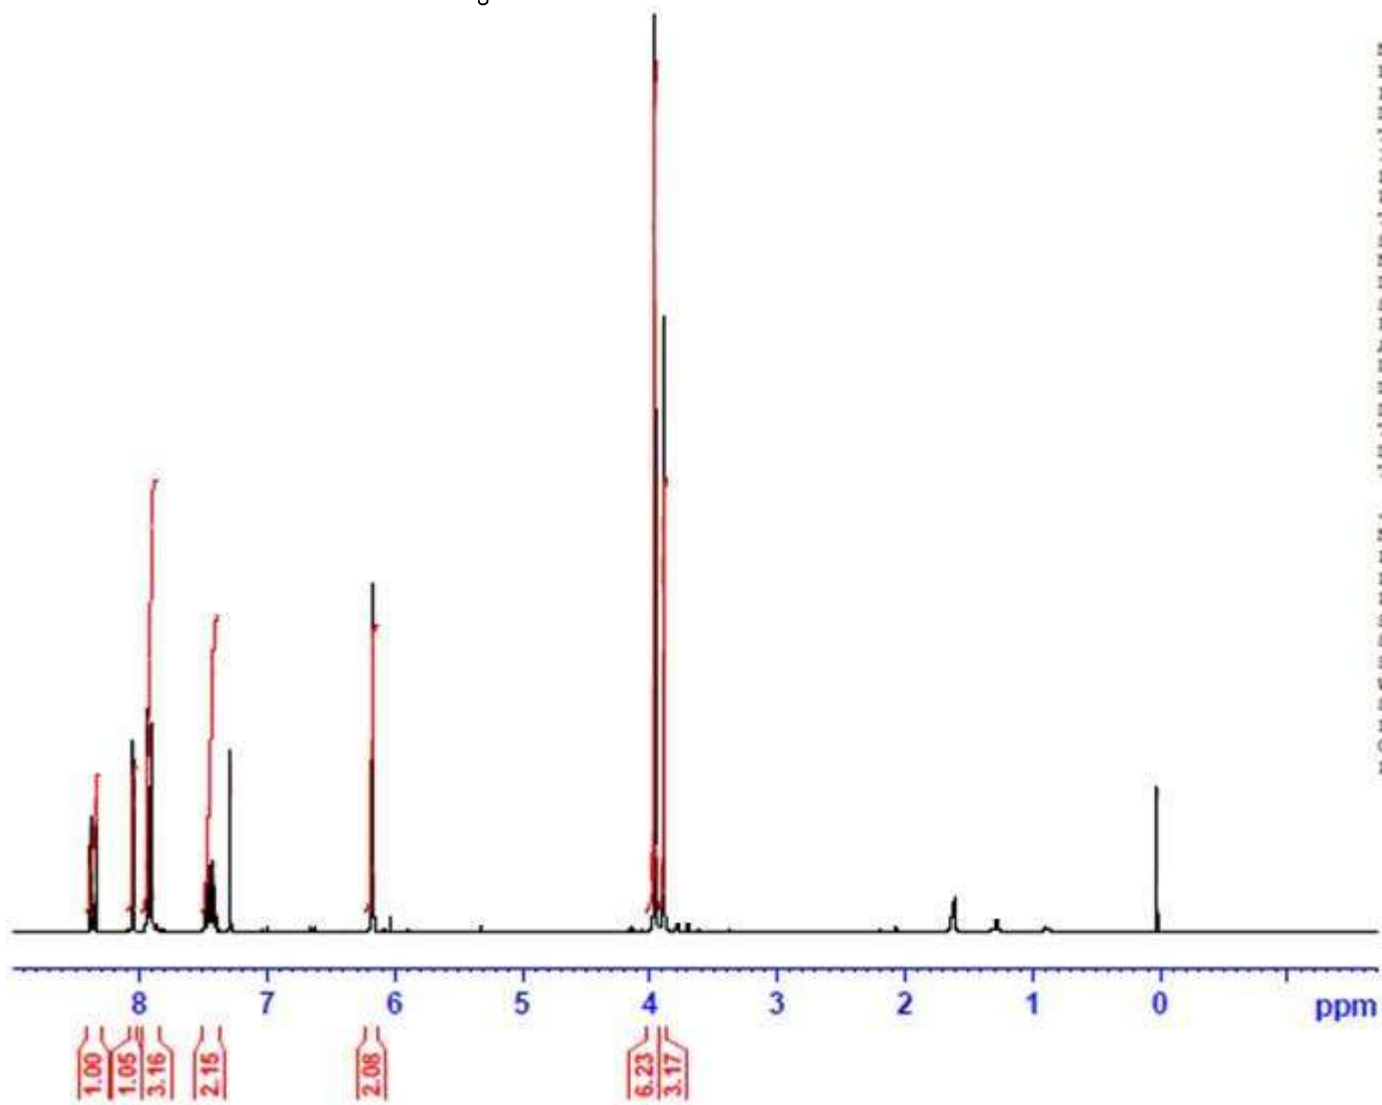

<sup>13</sup>C NMR

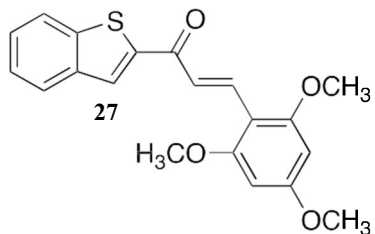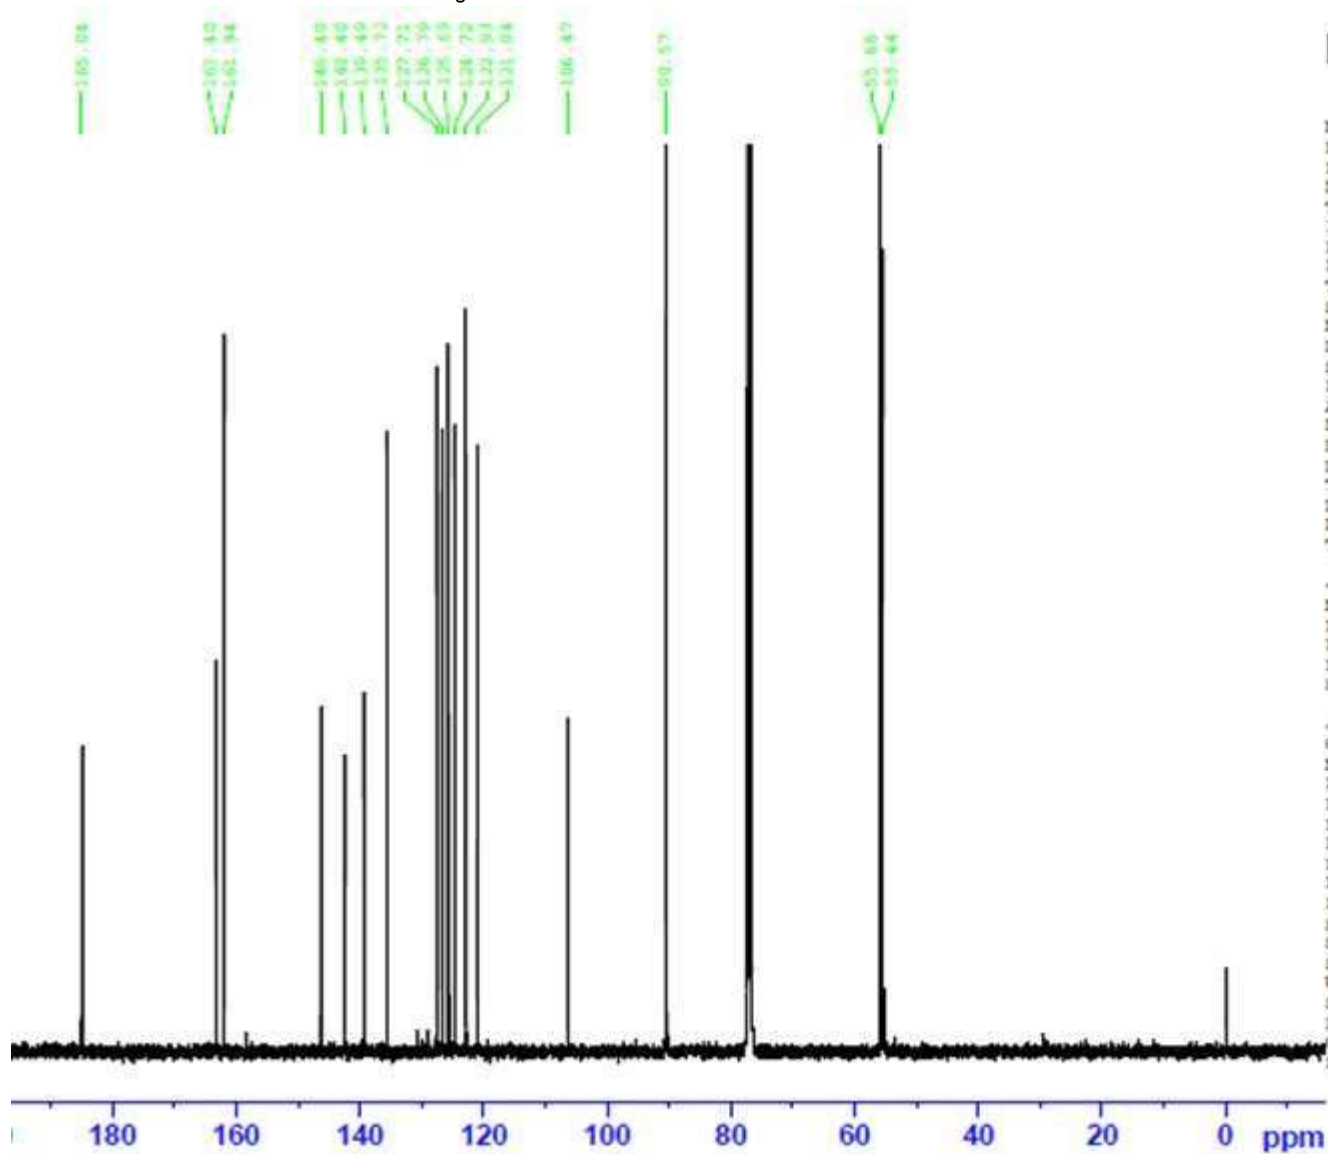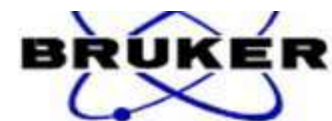

```
NAME Audrey Isabelle
EXPNO 67
PROCNO 1
Date_ 20190613
Time 0.49
INSTRUM spect
PROBHD 5 mm DABBO BB-
PULPROC zgpg30
TD 65536
SOLVENT CDCl3
NS 10000
DS 4
SWH 24038.461 Hz
FIDRES 0.366798 Hz
AQ 1.3631988 sec
RC 203
LW 20.800 usec
DE 6.50 usec
TE 298.0 K
D1 2.00000000 sec
D11 0.03000000 sec
TDO 1

----- CHANNEL f1 -----
NUC1 13C
P1 9.90 usec
PL1 -1.90 dB
PL1W 56.02249908 W
SFO1 100.6228298 MHz

----- CHANNEL f2 -----
CPDPRG2 waltz65
NUC2 1H
PCPD2 80.00 usec
PL2 0.30 dB
PL12 15.40 dB
PL13 18.40 dB
PL2W 11.25229936 W
PL12W 0.34772930 W
PL13W 0.17427748 W
SFO2 400.1316005 MHz
SI 32768
SF 100.6127690 MHz
WDW EM
SSB 0
LB 1.00 Hz
GB 0
PC 1.40
```

HRMS

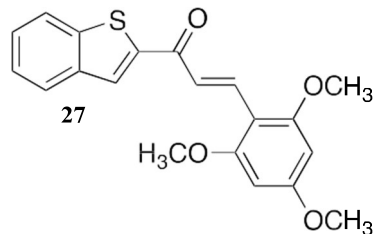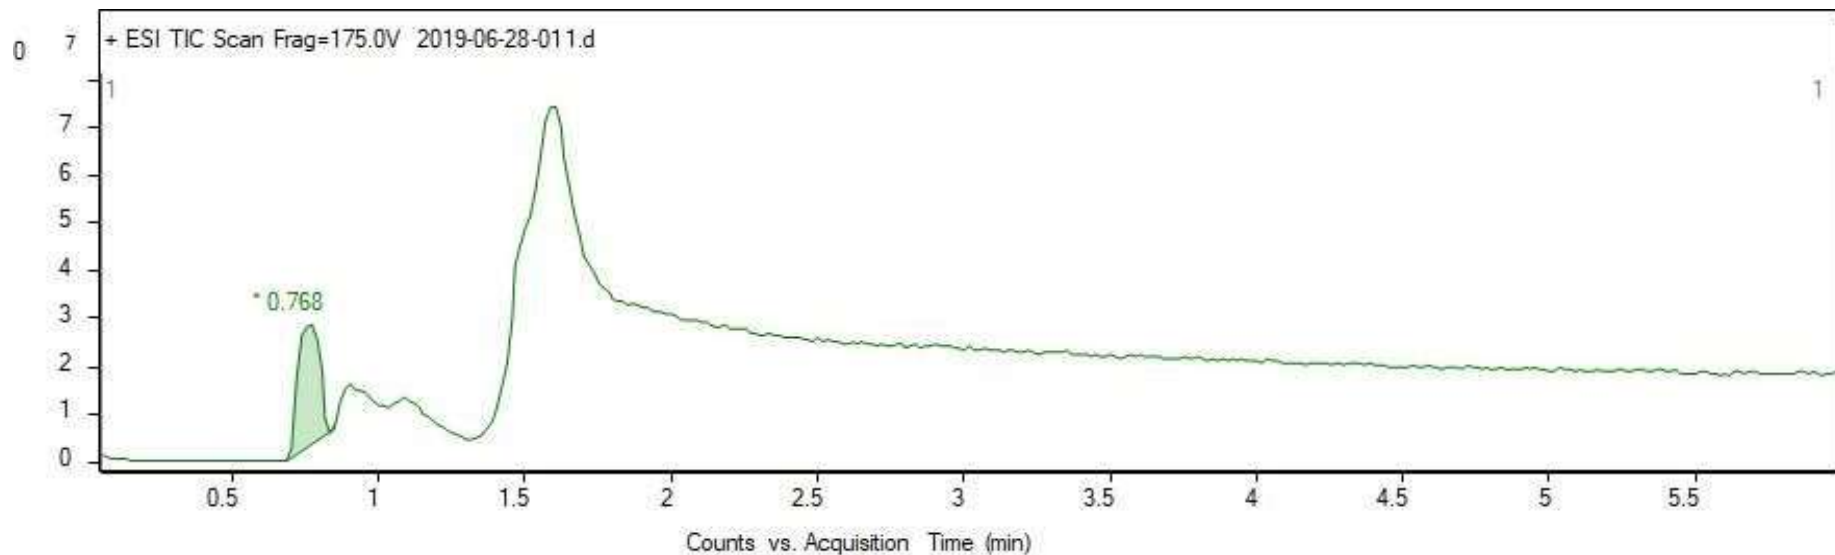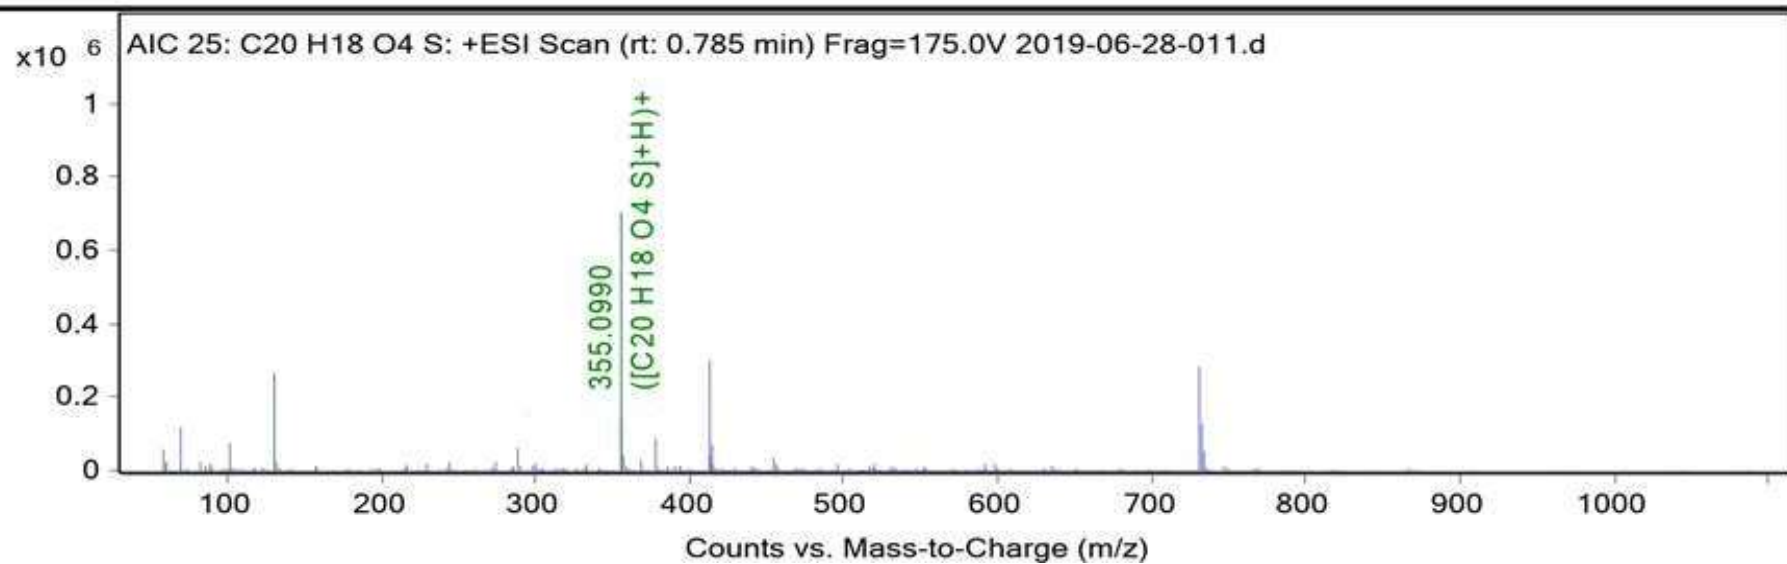

<sup>1</sup>H NMR

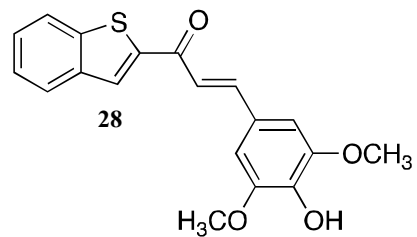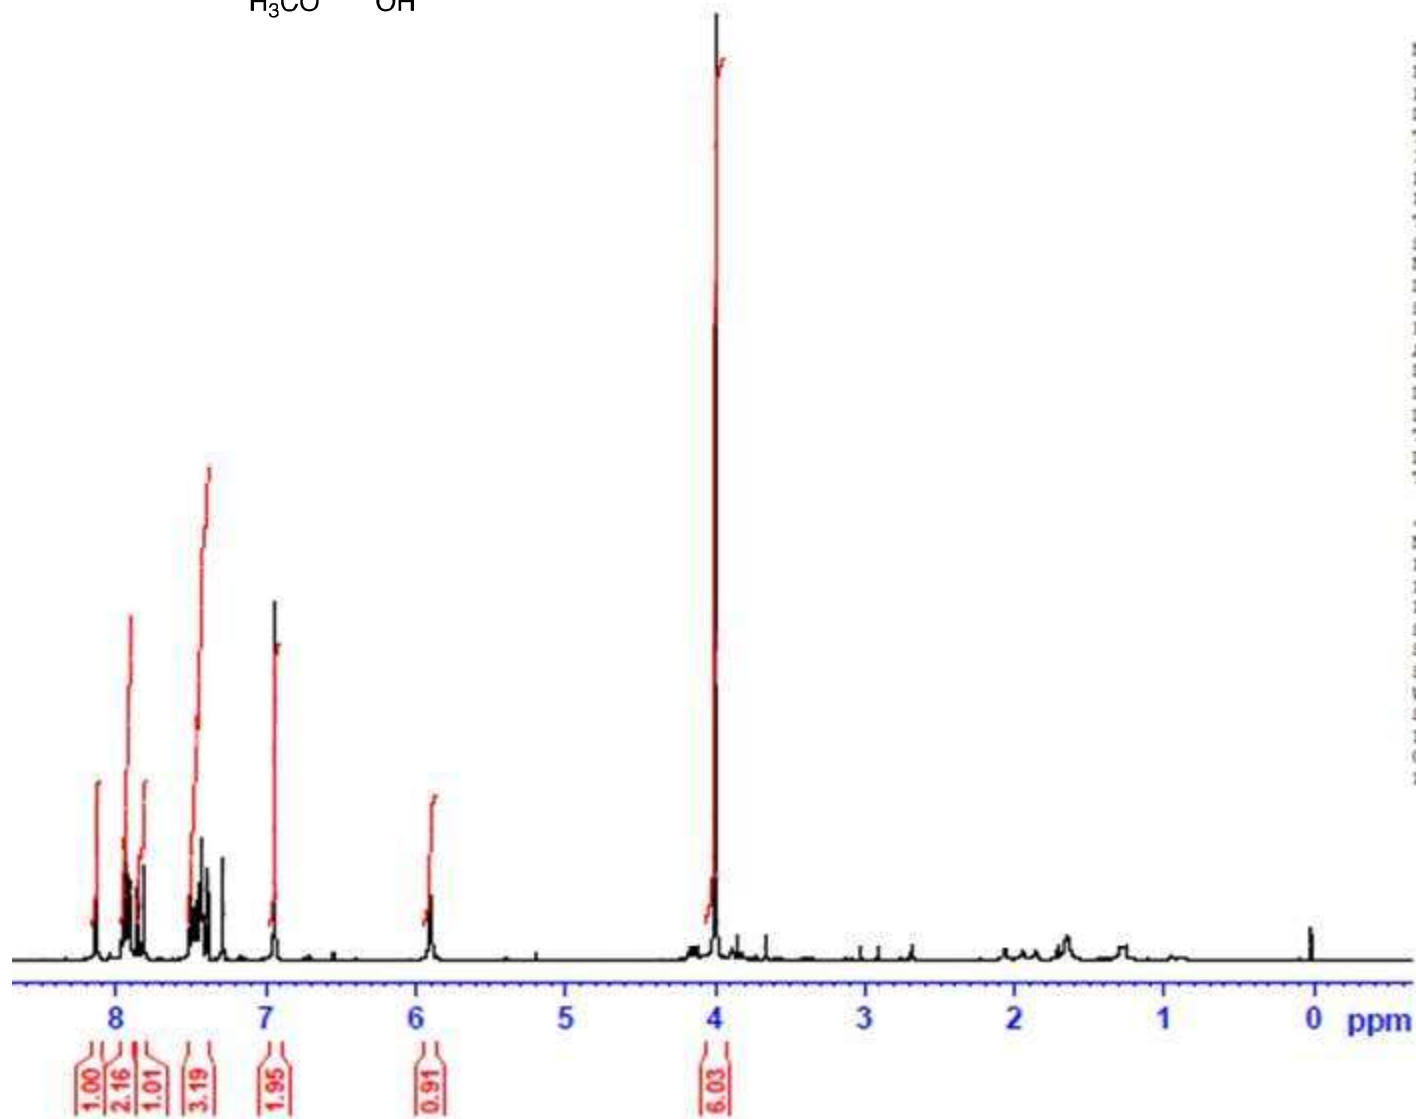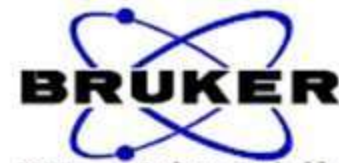

NAME Audrey Isabelle  
EXPNO 21  
PROCNO 1  
Date\_ 20190323  
Time\_ 10.38  
INSTRUM spect  
PROBHD 5 mm PABBO BB-  
PULPROC zg30  
TD 65536  
SOLVENT CDCl3  
NS 16  
DS 2  
SWH 8223.685 Hz  
FIDRES 0.125483 Hz  
AQ 3.9846387 sec  
RG 90.5  
LW 60.800 usec  
DE 6.50 usec  
TE 298.0 K  
D1 1.00000000 sec  
TD0 1

----- CHANNEL f1 -----  
NUC1 1H  
P1 14.07 usec  
PL1 0.30 dB  
PL1W 11.25229836 W  
SFO1 400.1324710 MHz  
S1 32768  
SF 400.1300000 MHz  
WDW EM  
SSB 0  
LB 0.30 Hz  
GB 0  
PC 1.00

<sup>13</sup>C NMR

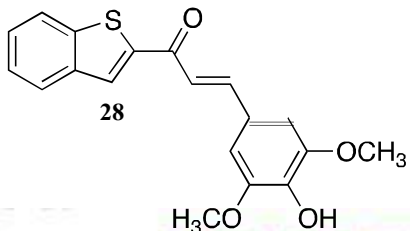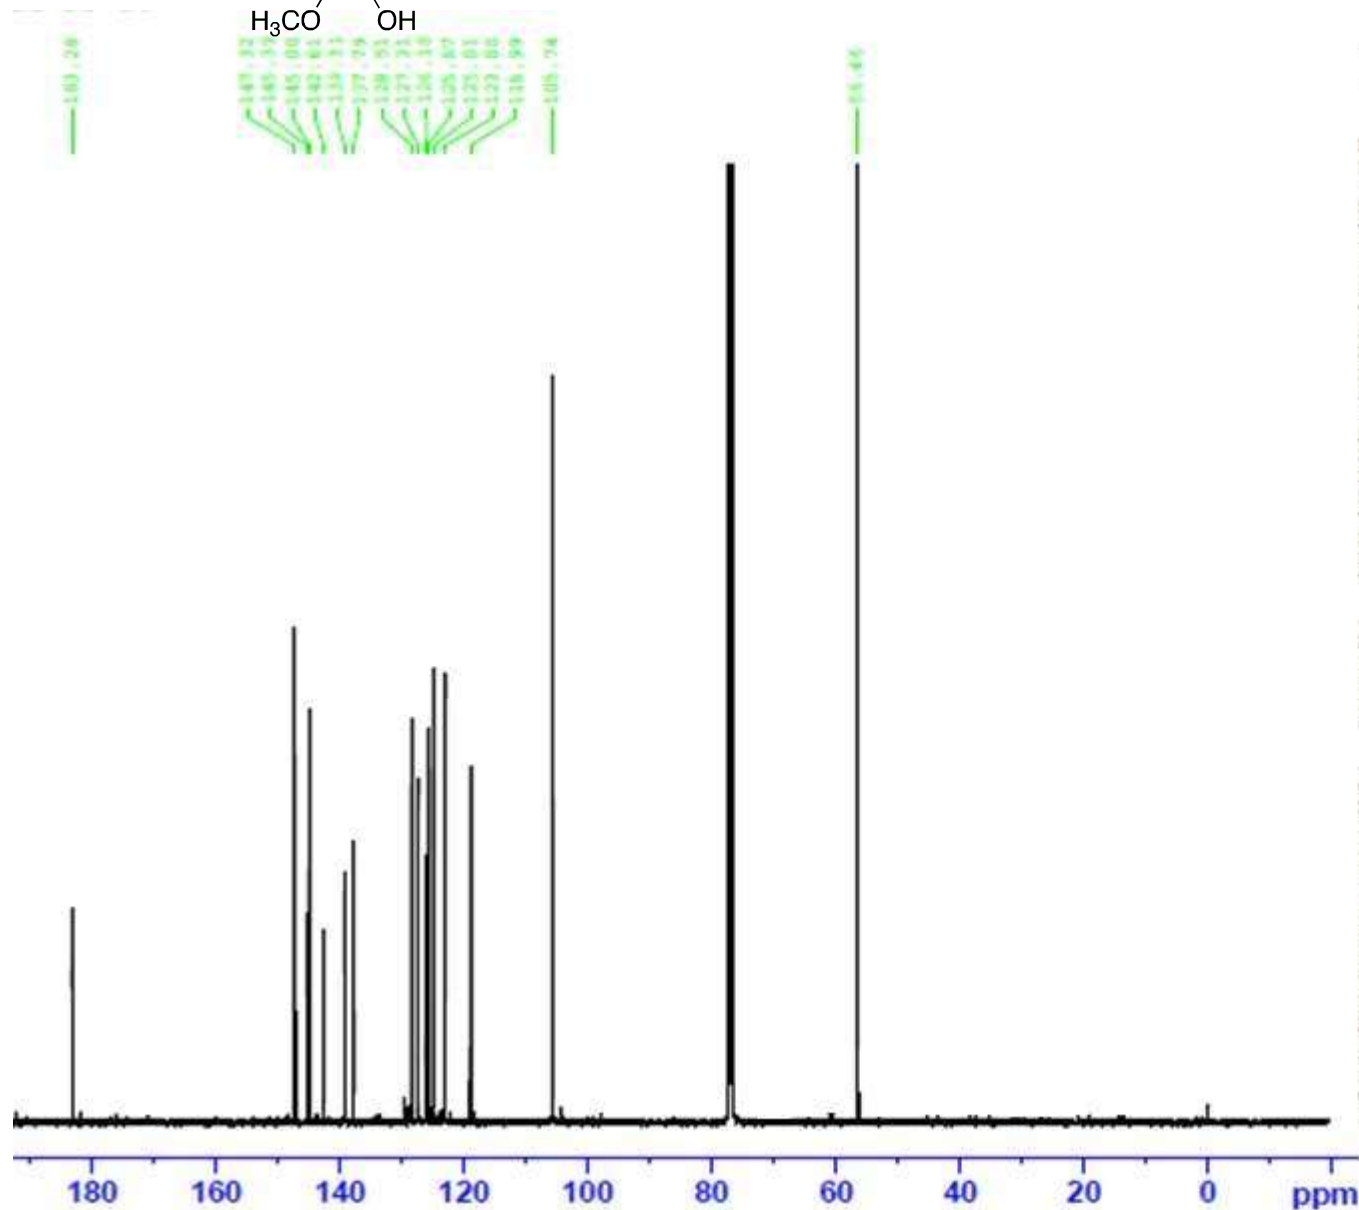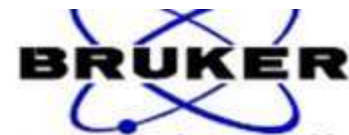

NAME Audrey Isabelle  
EXPNO 22  
PROCNO 1  
Date\_ 20190323  
Time\_ 22.11  
INSTRUM spect  
PROBHD 5 mm DABBO BB-  
PULPROG zgpg30  
TD 65536  
SOLVENT CDCl3  
NS 12000  
DS 4  
SWH 24038.461 Hz  
FIDRES 0.366798 Hz  
AQ 1.3631988 sec  
RG 203  
DM 20.800 usec  
DE 6.50 usec  
TE 298.0 K  
D1 2.00000000 sec  
D11 0.03000000 sec  
TD0 1

----- CHANNEL f1 -----  
NUC1 13C  
P1 9.90 usec  
PL1 -1.90 dB  
PL1W 56.02249908 W  
SFO1 100.6228298 MHz

----- CHANNEL f2 -----  
CDDPRG2 waltz65  
NUC2 1H  
PCPD2 80.00 usec  
PL2 0.30 dB  
PL12 15.40 dB  
PL13 18.40 dB  
PL2W 11.25229836 W  
PL12W 0.34772930 W  
PL13W 0.17427748 W  
SFO2 400.1316005 MHz  
SI 32768  
SF 100.6127690 MHz  
WDW EM  
SSB 0  
LB 1.00 Hz  
GB 0  
PC 1.40

HRMS

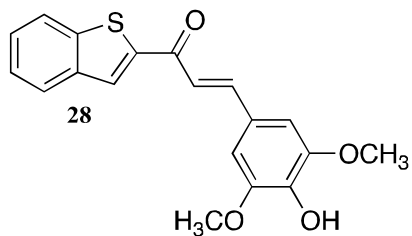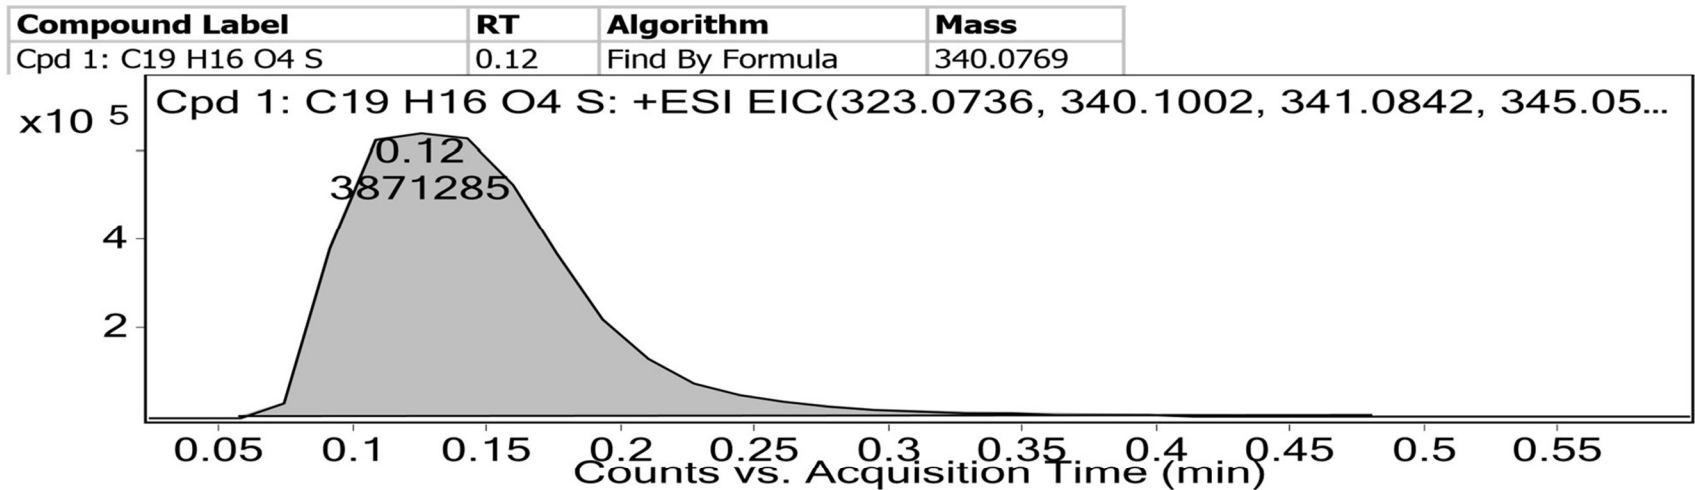

MS Spectrum

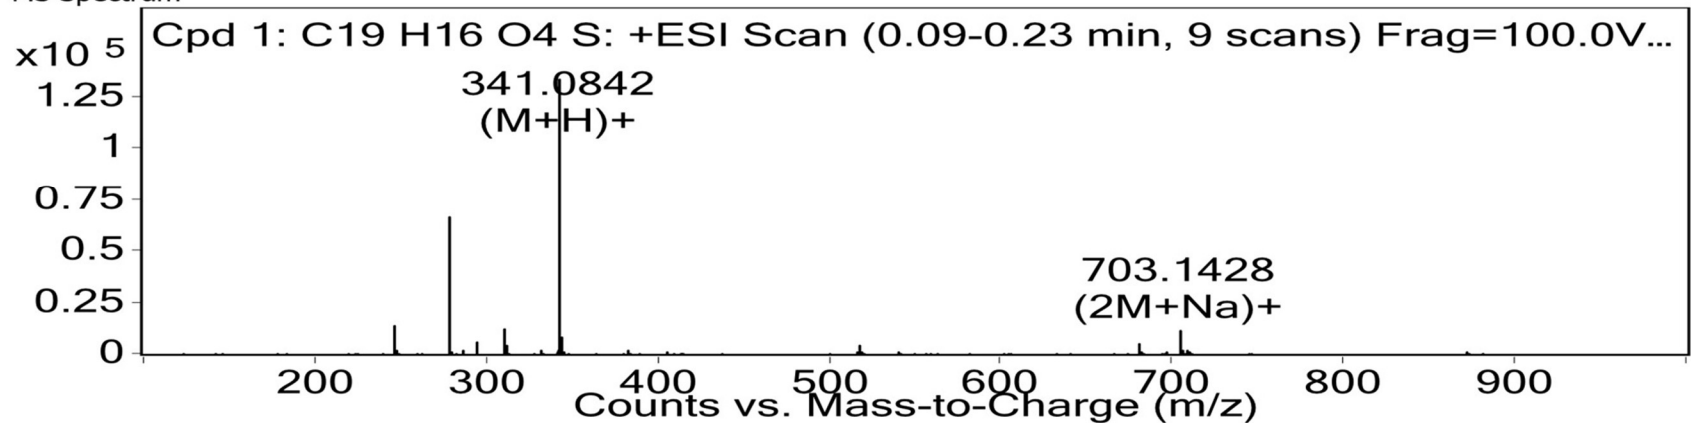

<sup>1</sup>H NMR

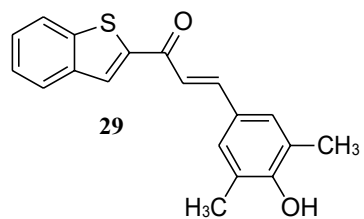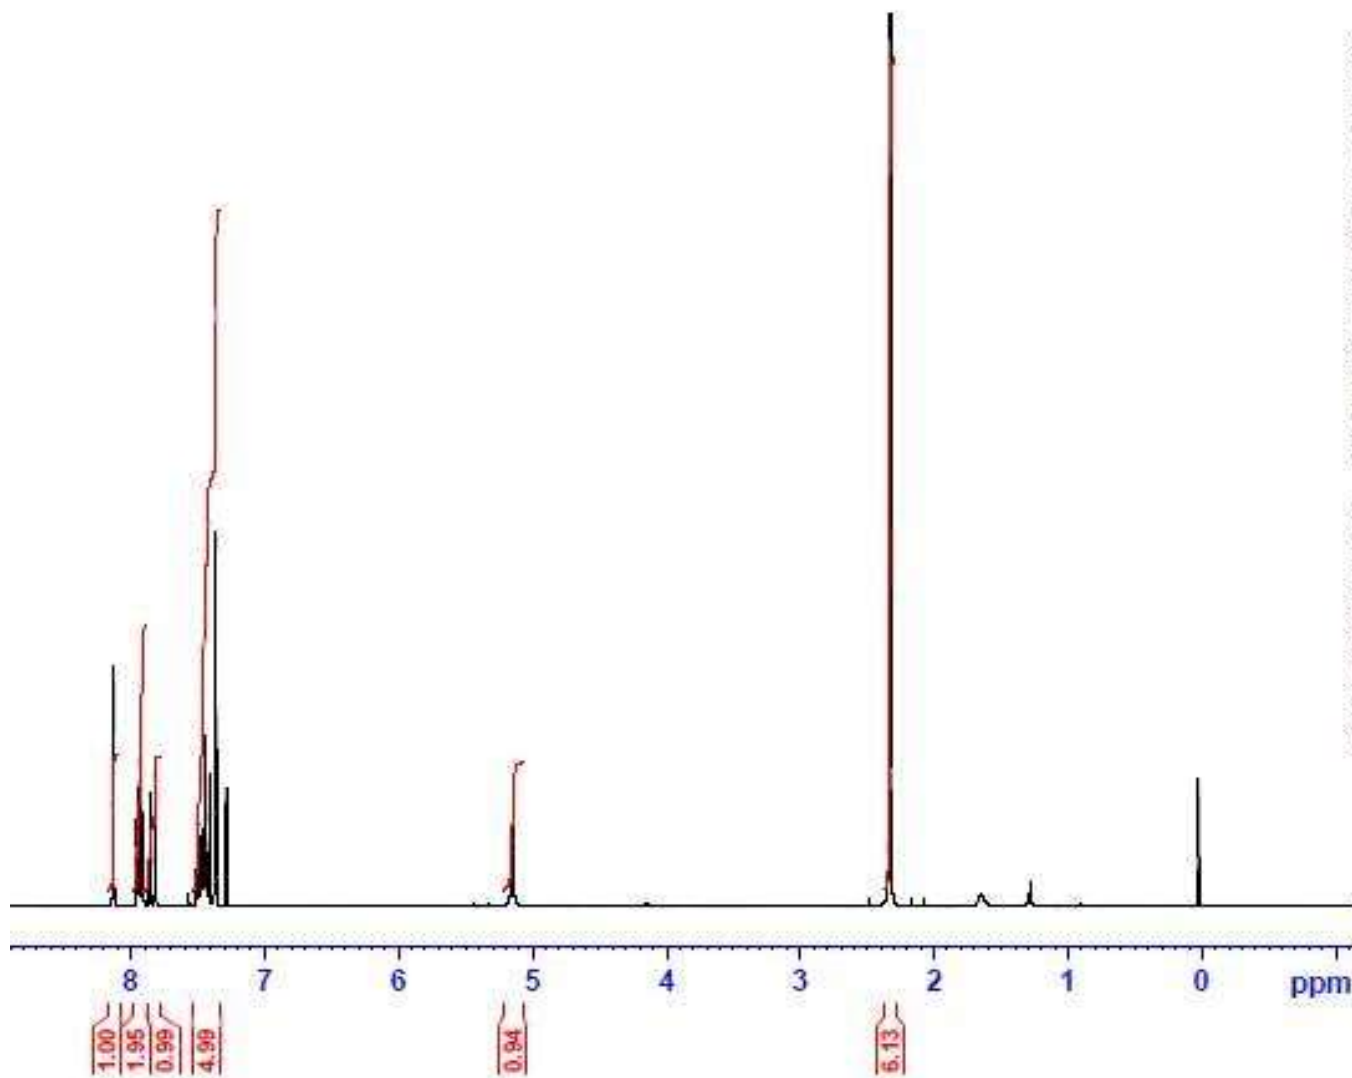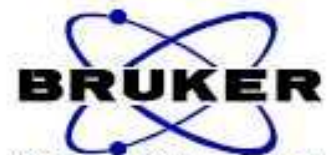

```
NAME      Audrey Isabelle
EXPNO     41
PROCNO    1
Date_     20190529
Time      9.24
INSTRUM   spect
PROBHD    5 mm PASPO BB-
PULPROG   zg30
TD         65536
SOLVENT   CDCl3
NS         16
DS         2
SWH        8223.685 Hz
FIDRES     0.125483 Hz
AQ         3.9846387 sec
RG         101
DW         60.800 usec
DE         6.50 usec
TE         298.0 K
D1         1.00000000 sec
TD0        1
```

```
----- CHANNEL f1 -----
NUC1      1H
P1        14.07 usec
PL1       0.30 dB
PL1W      11.25229836 W
SFO1      400.1324710 MHz
SI        32768
SF        400.1300000 MHz
WDW       EM
SSB       0
LB        0.30 Hz
GB        0
PC        1.00
```



<sup>13</sup>C NMR

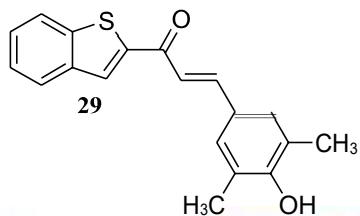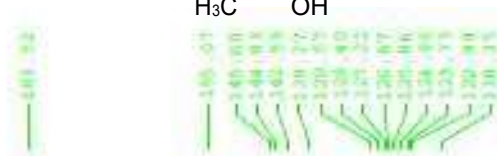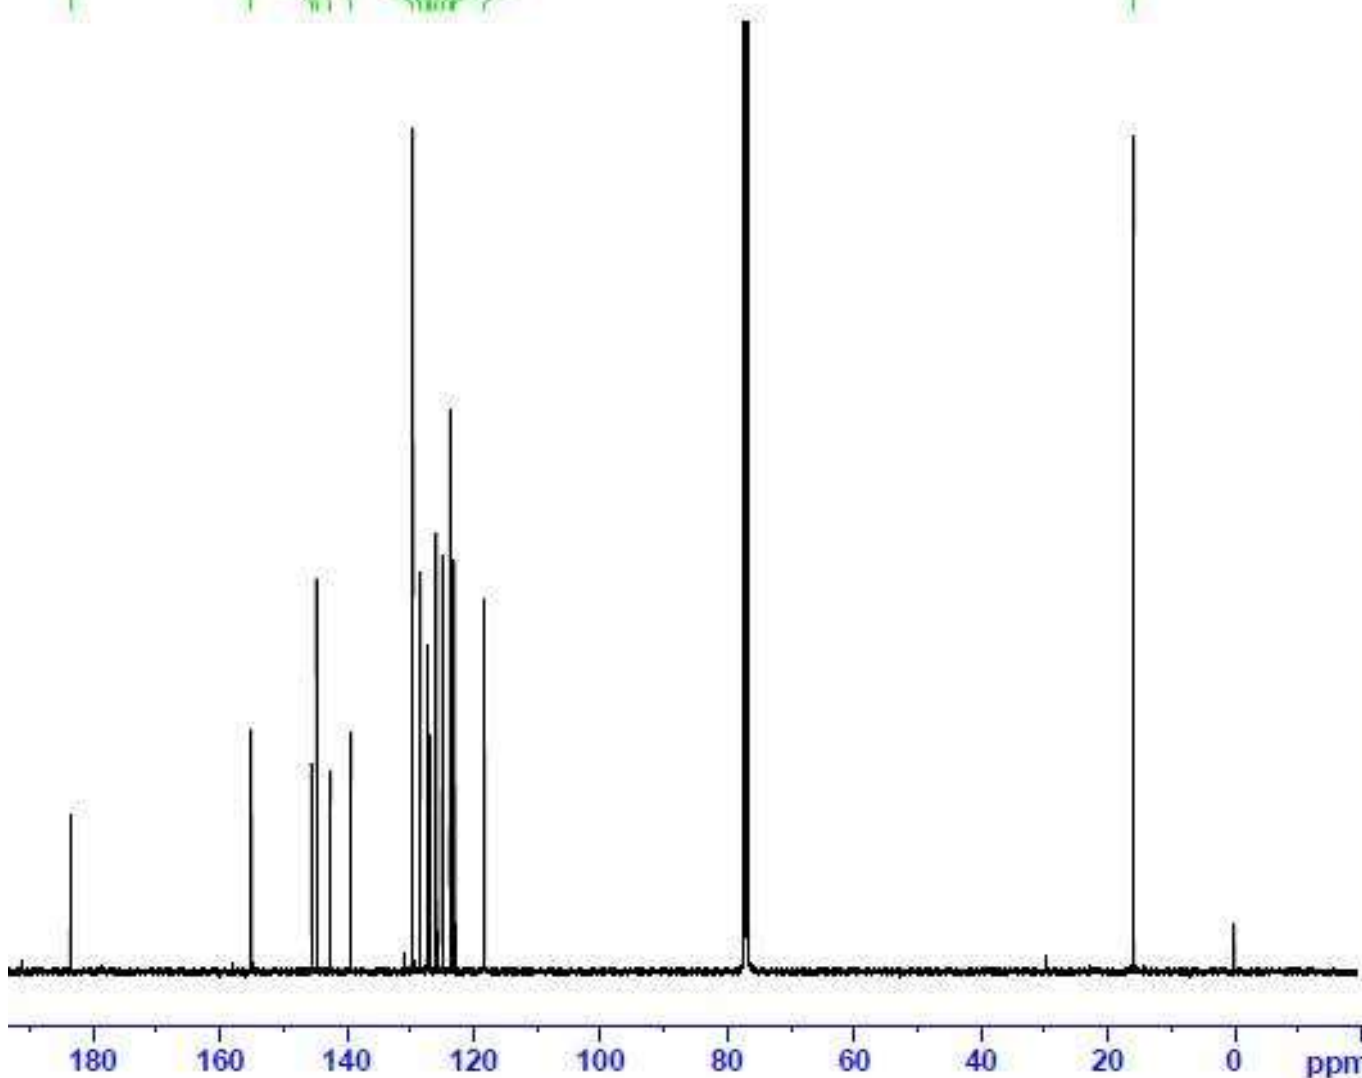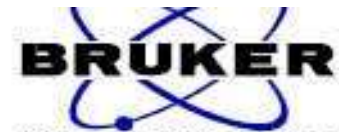

NAME Audrey Isabelle  
EXPNO 46  
PROCNO 1  
Date 20190529  
Time 23.08  
INSTRUM spect  
PROBHD 5 mm DABBO BB-  
PULPROG zgpg30  
TD 65536  
SOLVENT CDCl3  
NS 10000  
DS 4  
SWH 24038.461 Hz  
FIDRES 0.366798 Hz  
AQ 1.3631988 sec  
RG 203  
DW 20.800 usec  
DE 6.50 usec  
TE 298.0 K  
D1 2.00000000 sec  
D11 0.03000000 sec  
TD0 1

----- CHANNEL f1 -----  
NUC1 13C  
P1 9.90 usec  
PL1 -1.90 dB  
PL1W 56.02249908 W  
SFO1 100.6228298 MHz

----- CHANNEL f2 -----  
CPDPRG2 waltz65  
NUC2 1H  
PCPD2 80.00 usec  
PL2 0.30 dB  
PL12 15.40 dB  
PL13 18.40 dB  
PL2W 11.25229836 W  
PL12W 0.34772930 W  
PL13W 0.17427748 W  
SFO2 400.1316005 MHz  
SI 32768  
SF 100.6127690 MHz  
WDW EM  
SSB 0  
LB 1.00 Hz  
GB 0  
DC 1.40



HRMS

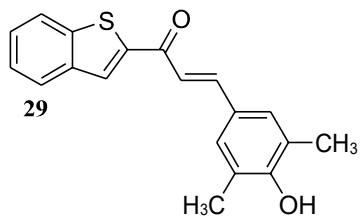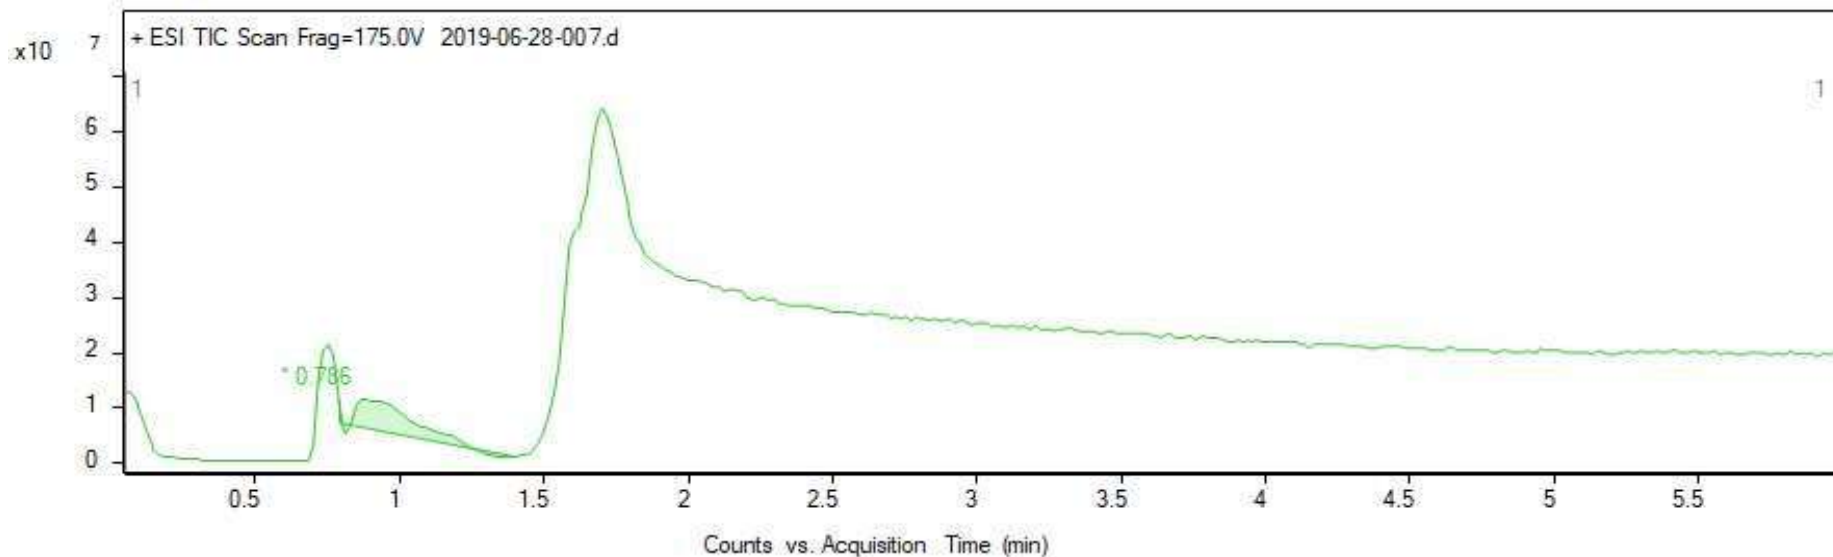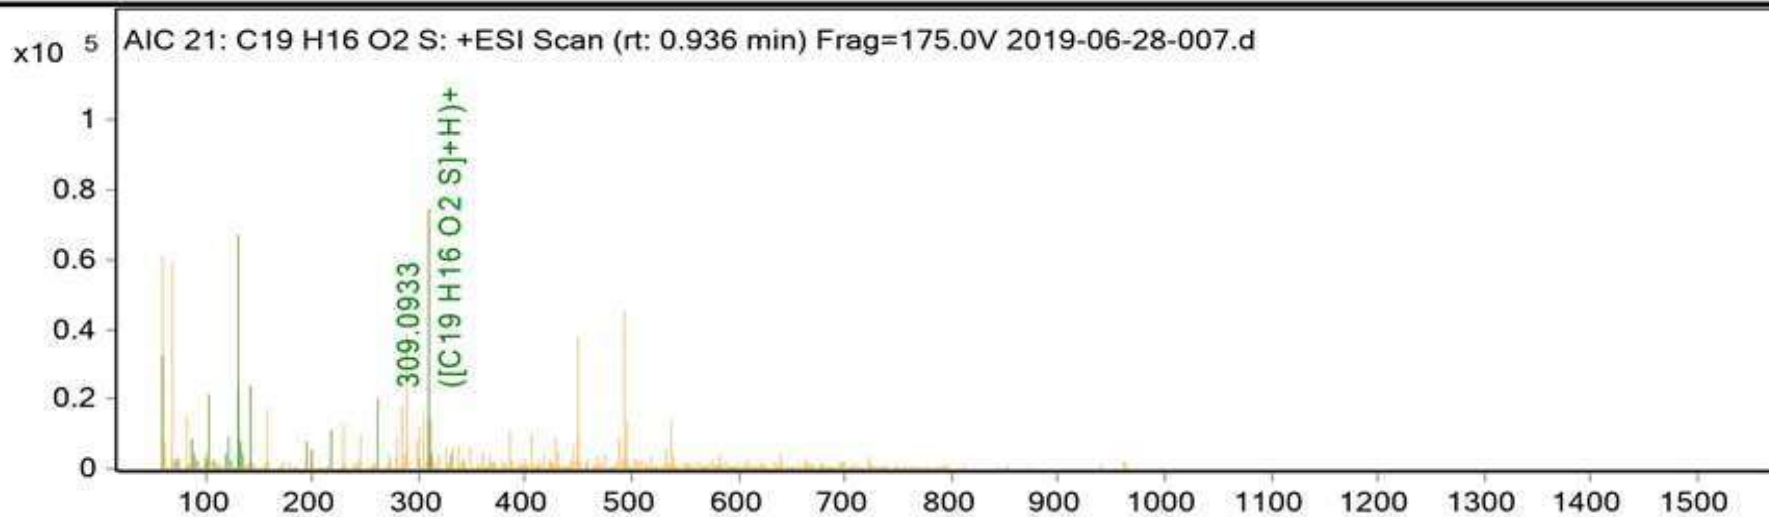

<sup>1</sup>H NMR

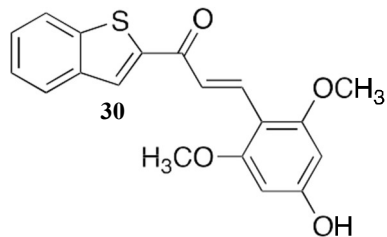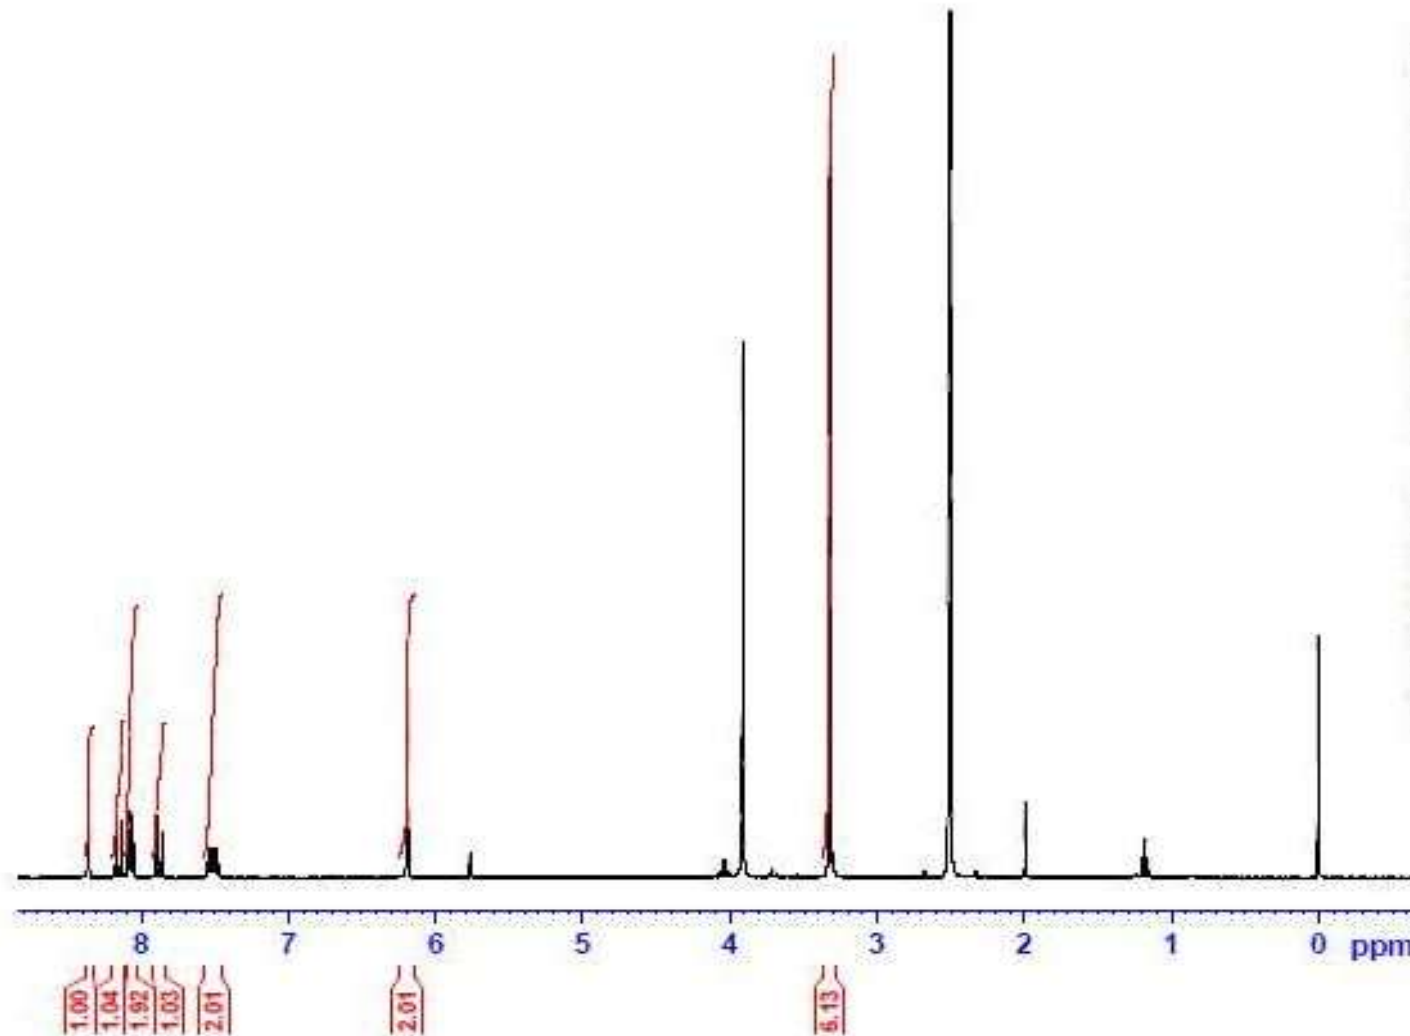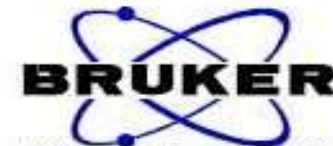

```
NAME Audrey Isabelle
EXPNO 34
PROCNO 1
Date_ 20190522
Time_ 13.29
INSTRUM spect
PROBHD 5 mm DABBO BB-
PULPROG zg30
TD 65536
SOLVENT DMSO
NS 16
DS 2
SWH 8223.685 Hz
FIDRES 0.125483 Hz
AQ 3.9846387 sec
RG 203
DW 50.800 usec
DE 6.50 usec
TE 298.0 K
D1 1.00000000 sec
TD0 1
```

```
----- CHANNEL F1 -----
NUC1 1H
P1 14.07 usec
PL1 0.30 dB
PL1W 11.25229836 W
SFO1 400.1324710 MHz
SI 32768
SF 400.1300000 MHz
WDW EM
SSE 0
LB 0.30 Hz
GB 0
PC 1.00
```



HRMS

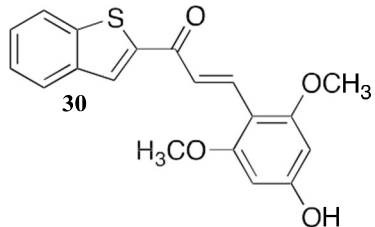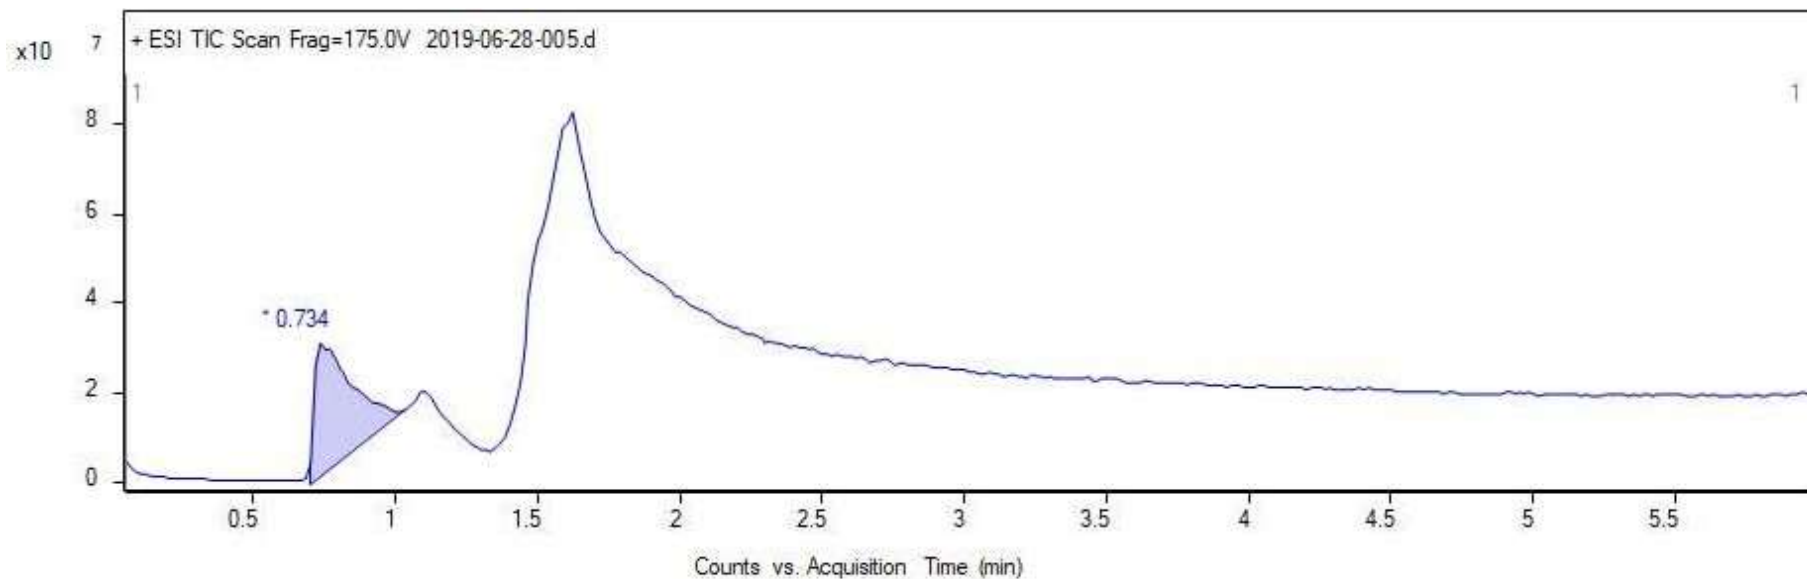

AIC 19: C19 H16 O4 S: +ESI Scan (rt: 0.751 min) Frag=175.0V 2019-06-28-005.d

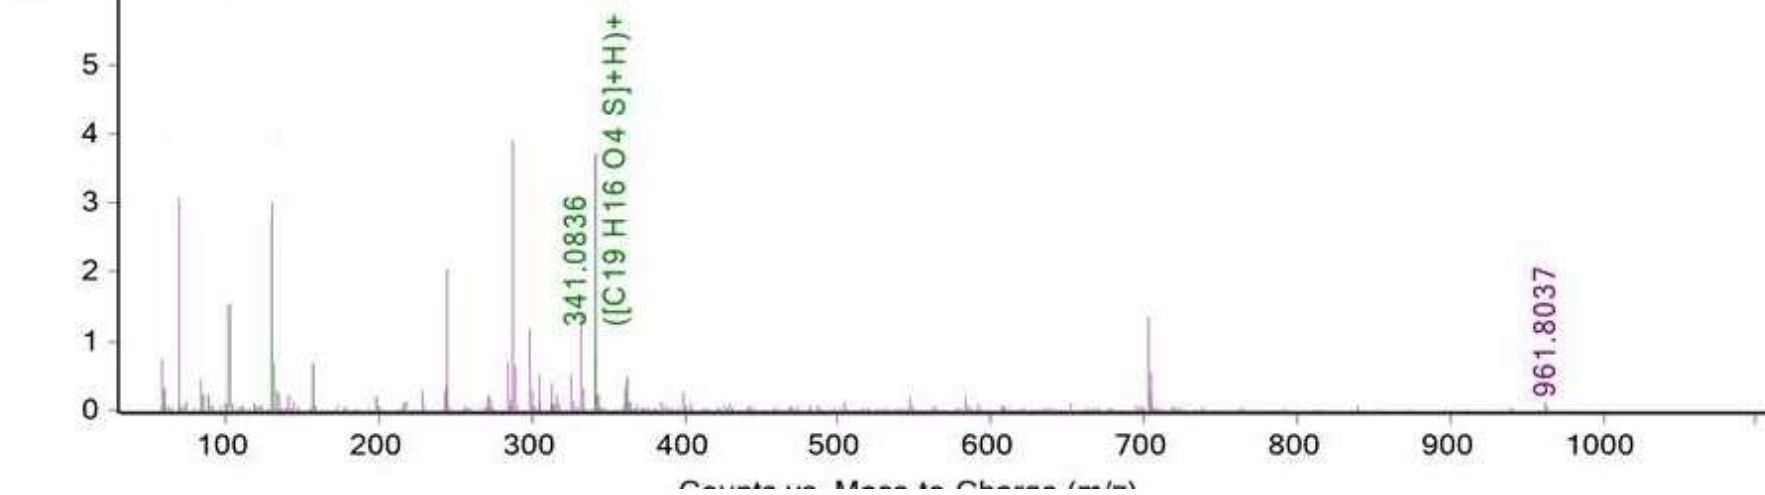

<sup>1</sup>H NMR

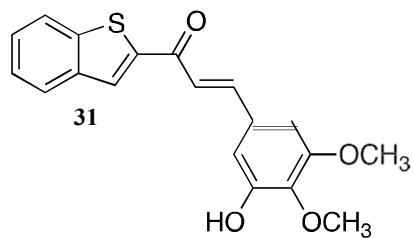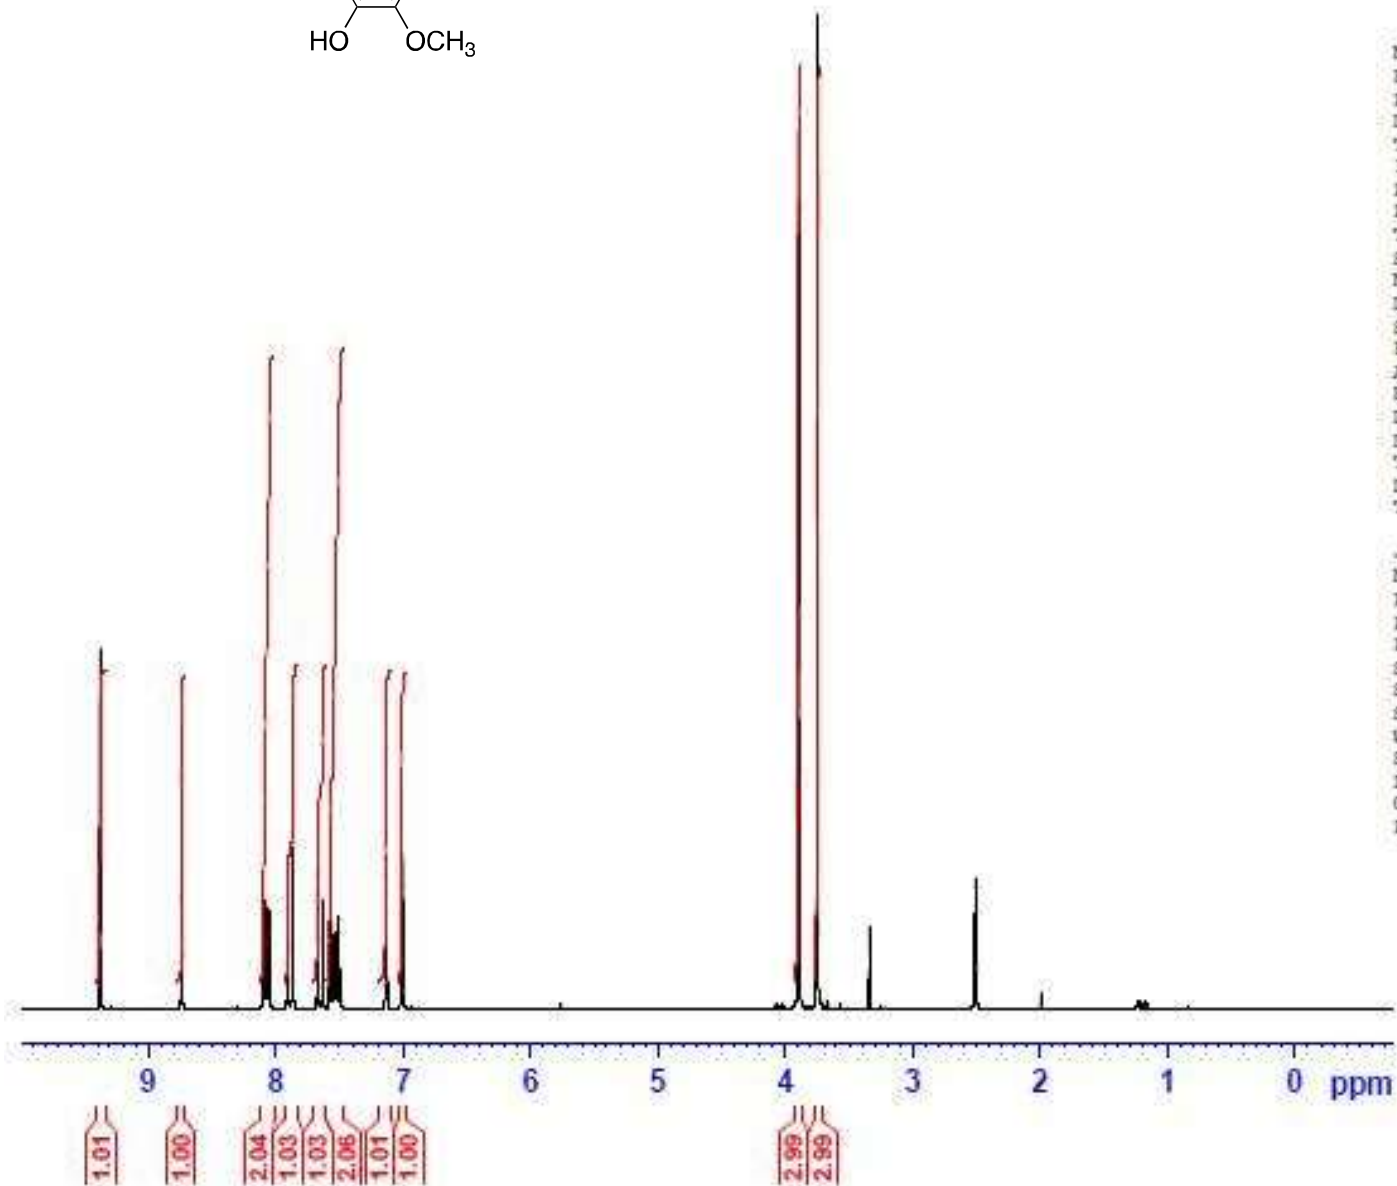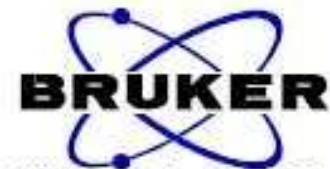

```
NAME      Audrey Isabelle
EXPNO     89
PROCNO    1
Date_     20190625
Time      8.21
INSTRUM   spect
PROBHD    5 mm PABBO BB-
PULPROG   zg30
TD        65536
SOLVENT   DMSO
NS        16
DS        2
SWH       8223.685 Hz
FIDRES    0.125483 Hz
AQ        1.9846387 sec
RG        101
DW        60.800 usec
DE        6.50 usec
TE        298.0 K
D1        1.00000000 sec
TD0       1
```

```
----- CHANNEL F1 -----
NUC1      1H
P1        14.07 usec
PL1       0.30 dB
PL1W      11.25229836 W
SFO1      400.1324710 MHz
SI        32768
SF        400.1300000 MHz
WDW       EM
SSB       0
LB        0.30 Hz
GB        0
PC        1.00
```

<sup>13</sup>C NMR

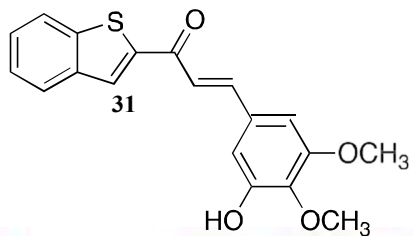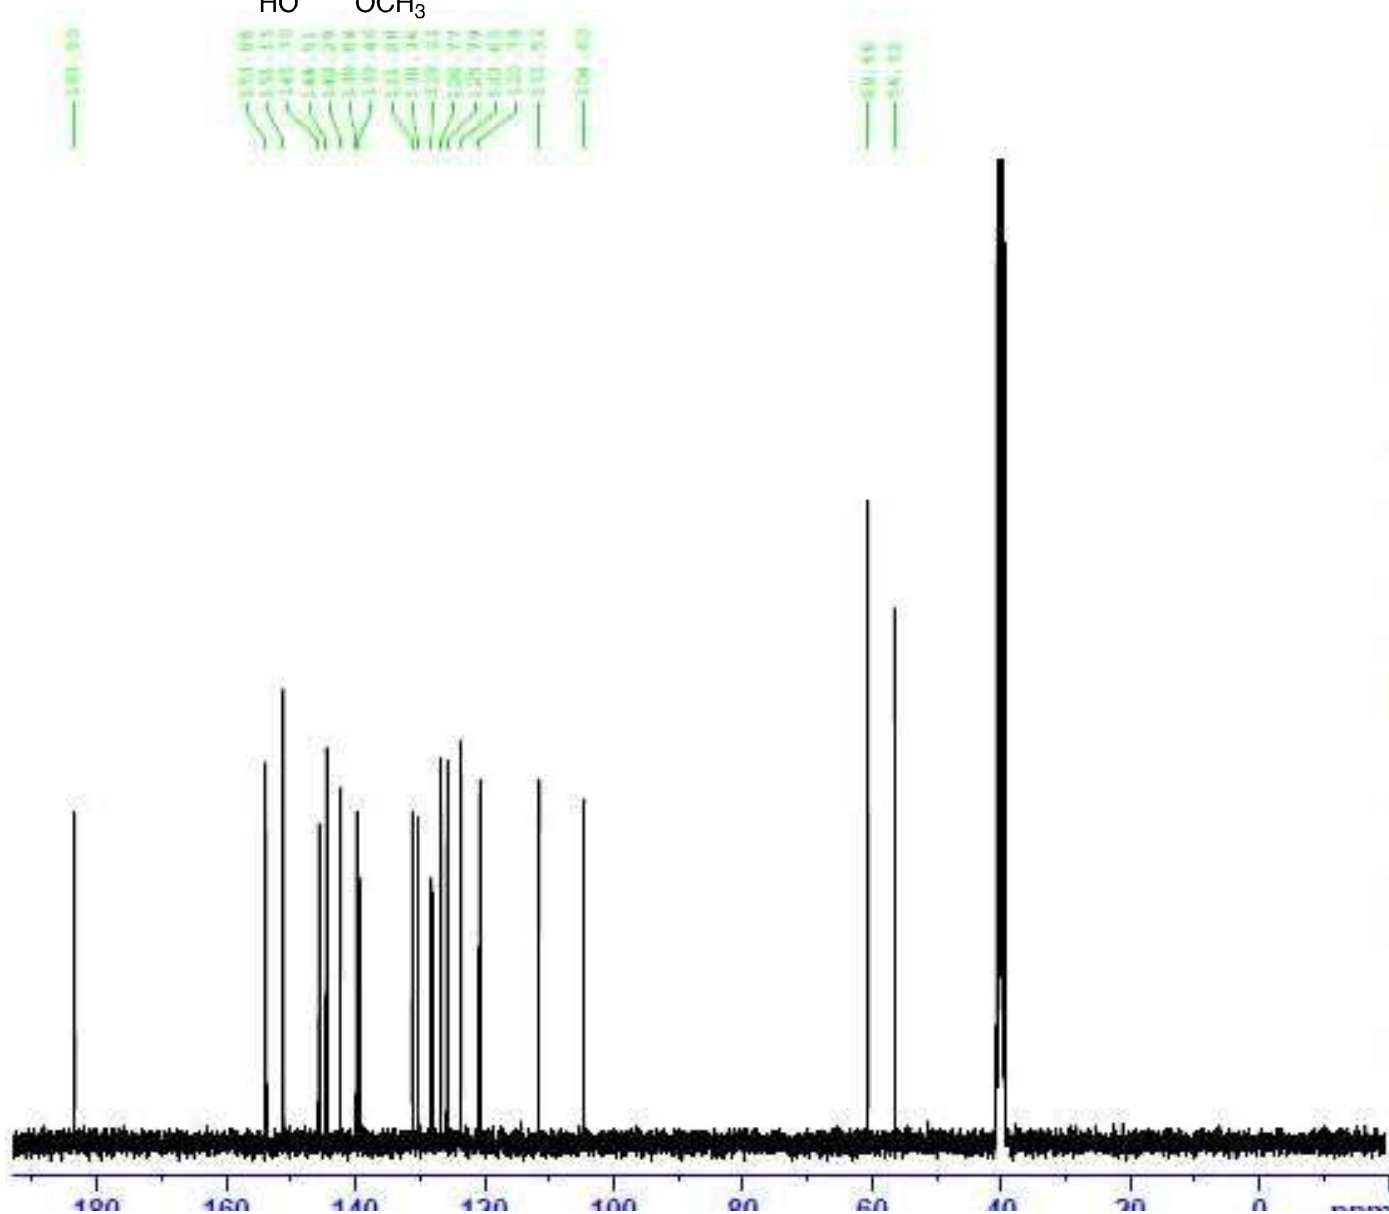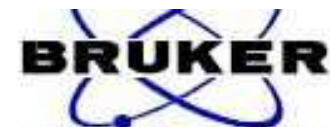

NAME Audrey Isabelle  
EXPNO 91  
PROCNO 1  
Date\_ 20190625  
Time 10.03  
INSTRUM spect  
PROBHD 5 mm DABBO BB-  
PULPROG zgpg30  
TD 65536  
SOLVENT DMSO  
NS 1574  
DS 4  
SWH 24038.461 Hz  
FIDRES 0.366798 Hz  
AQ 1.3631988 sec  
RG 203  
EW 20.800 usec  
DE 6.50 usec  
TE 298.0 K  
D1 2.00000000 sec  
D11 0.03000000 sec  
TD0 1

----- CHANNEL F1 -----  
NUC1 13C  
P1 9.90 usec  
PL1 -1.90 dB  
PL1W 56.02248908 W  
SFO1 100.6228298 MHz

----- CHANNEL F2 -----  
CDDPRG2 waltz165  
NUC2 1H  
PCDD2 80.00 usec  
PL2 0.30 dB  
PL12 15.40 dB  
PL13 18.40 dB  
PL2W 31.25229836 W  
PL12W 0.34772930 W  
PL13W 0.17427748 W  
SFO2 400.1316005 MHz  
SI 32768  
SF 100.6127690 MHz  
WDW EM  
SSB 0  
LB 1.00 Hz  
GB 0  
DC 1.40

HRMS

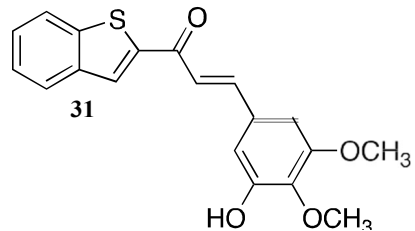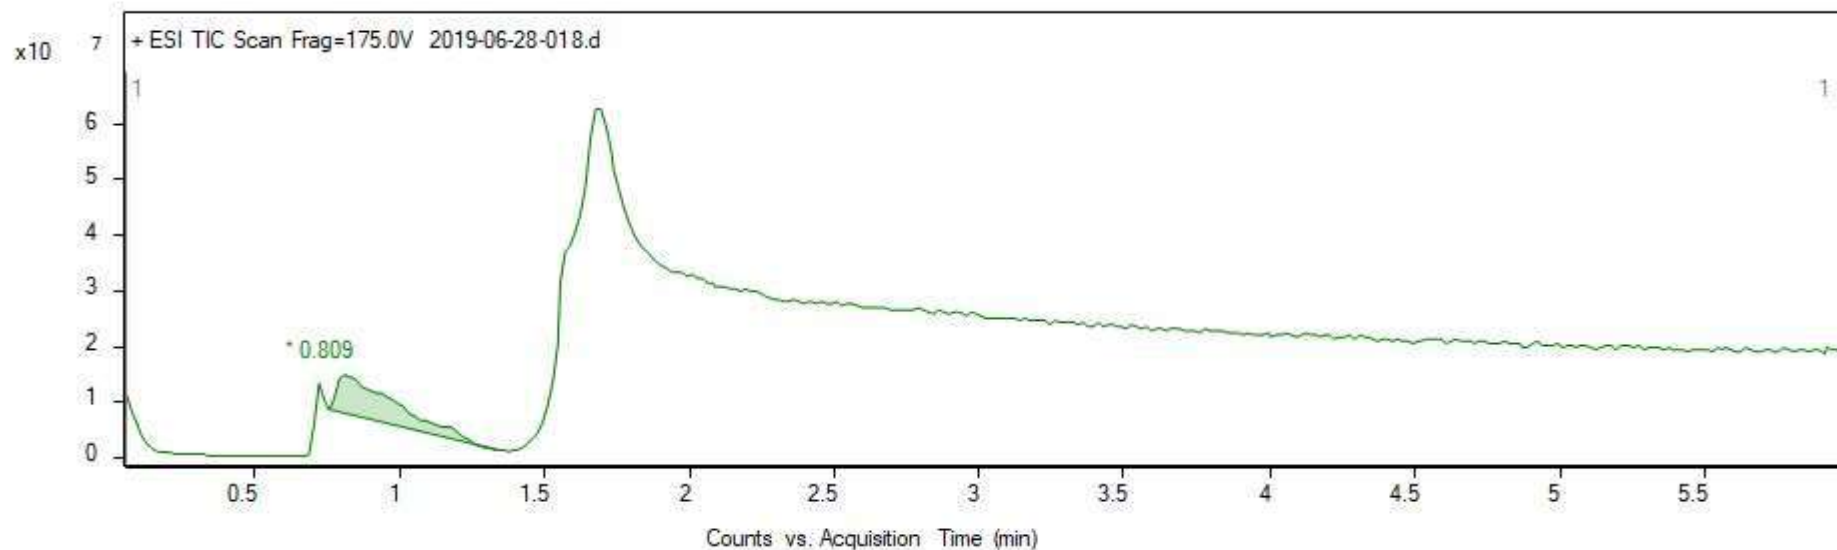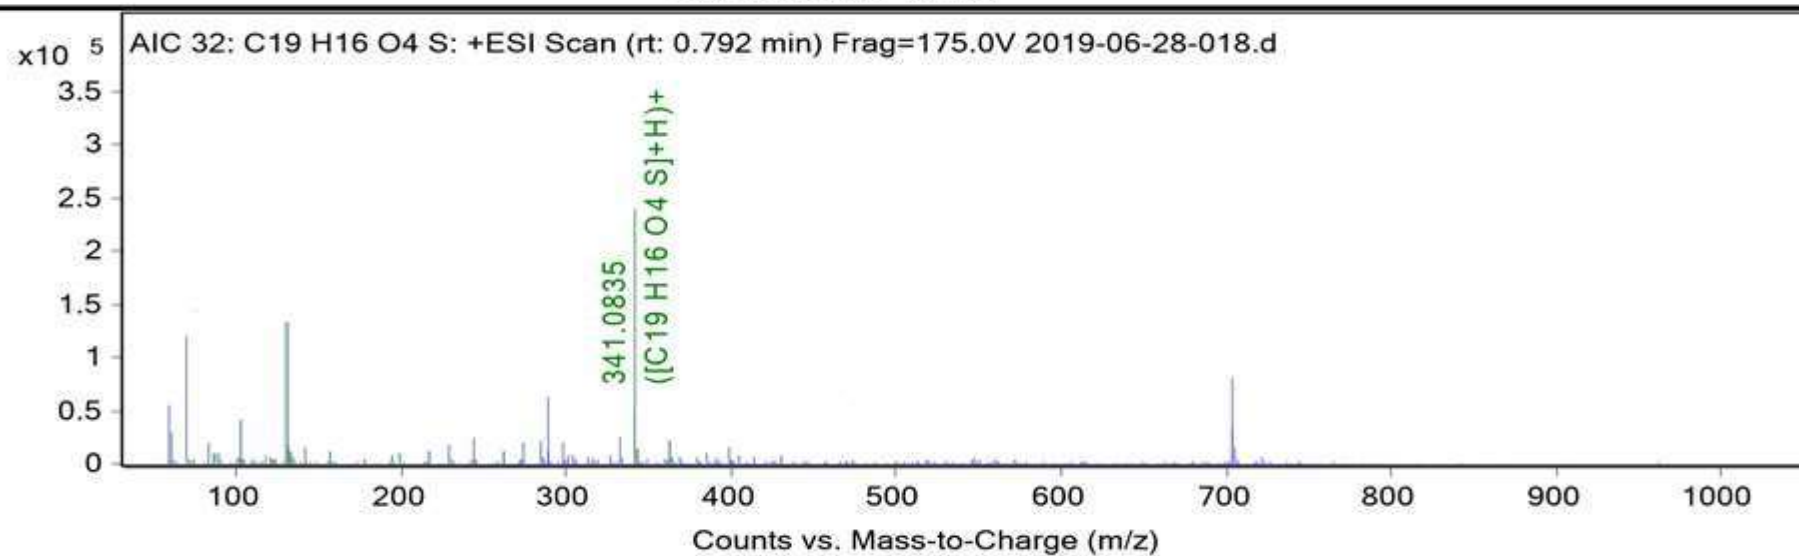



<sup>1</sup>H NMR

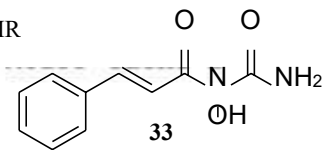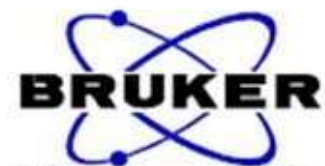

NAME Moh RX  
EXPNO 396  
PROCNO 1  
Date\_ 20190522  
Time\_ 13.37  
INSTRUM spect  
PROBHD 5 mm PABBO BB-  
PULPROC zg30  
TD 65536  
SOLVENT DMSO  
NS 16  
DS 2  
EWH 8223.685 Hz  
FIDRES 0.125483 Hz  
AQ 3.9846387 sec  
RG 128  
DW 60.800 usec  
DE 6.50 usec  
TE 298.0 K  
D1 1.00000000 sec  
TDO 1

----- CHANNEL f1 -----  
NUC1 1H  
P1 14.07 usec  
PL1 0.30 dB  
PL1W 11.25229836 W  
SFO1 400.1324710 MHz  
S1 32768  
SF 400.1300000 MHz  
WDW EM  
SSB 0  
LB 0.30 Hz  
CB 0  
PC 1.00

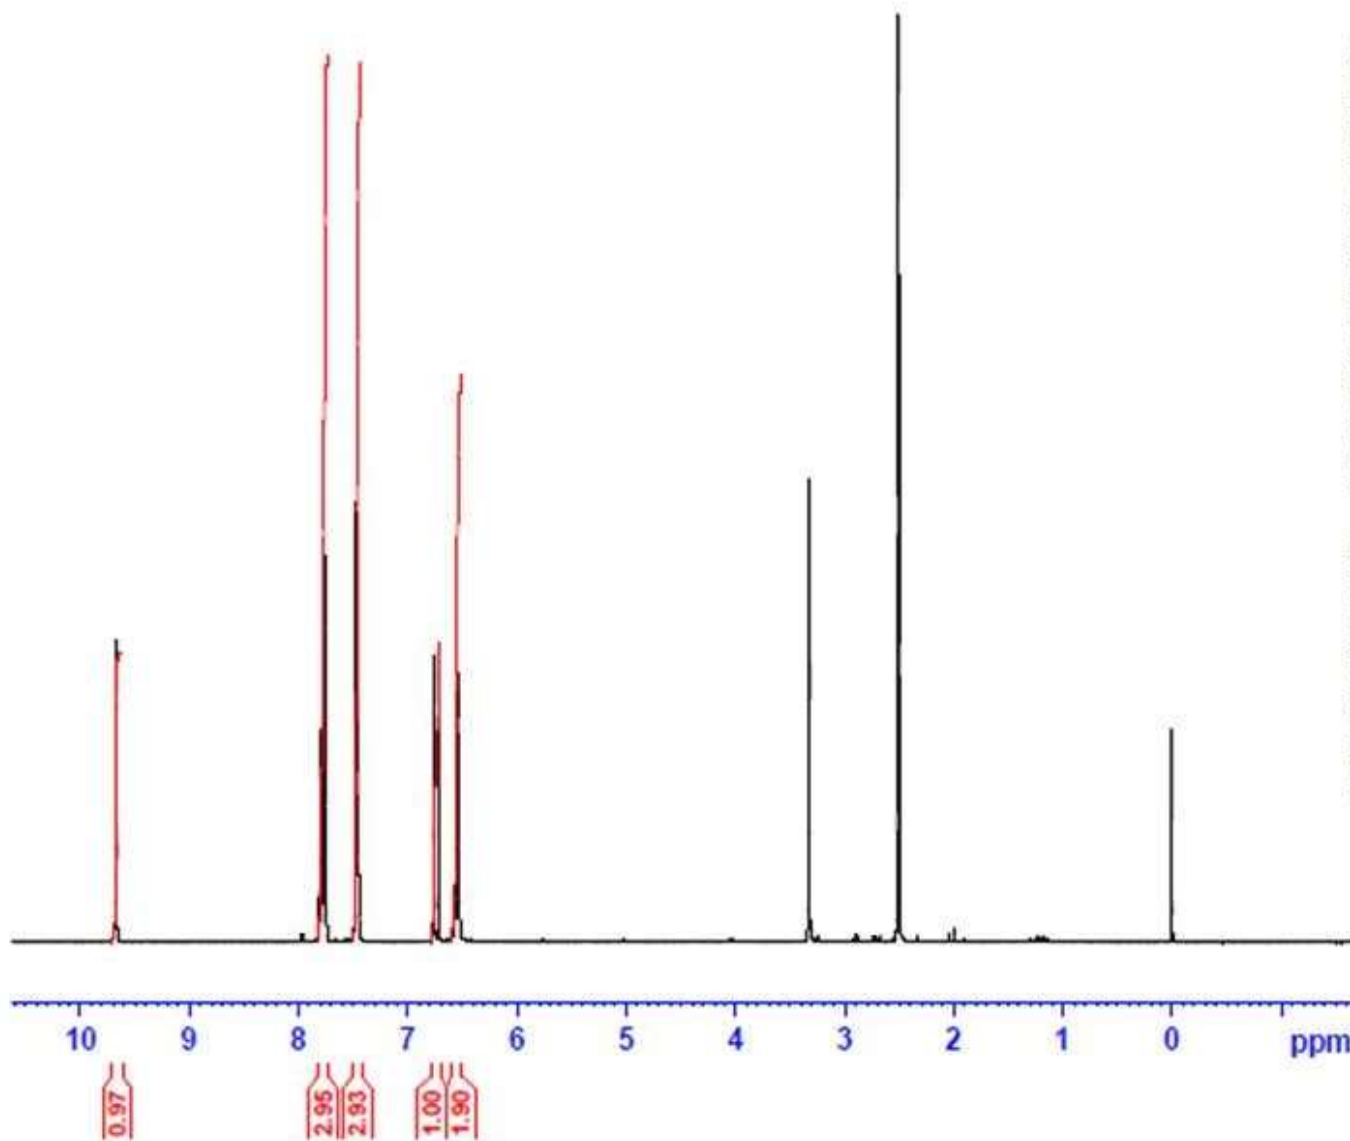



<sup>13</sup>C NMR

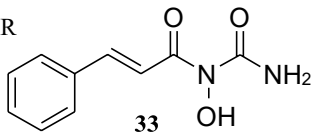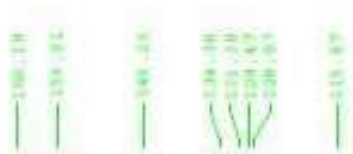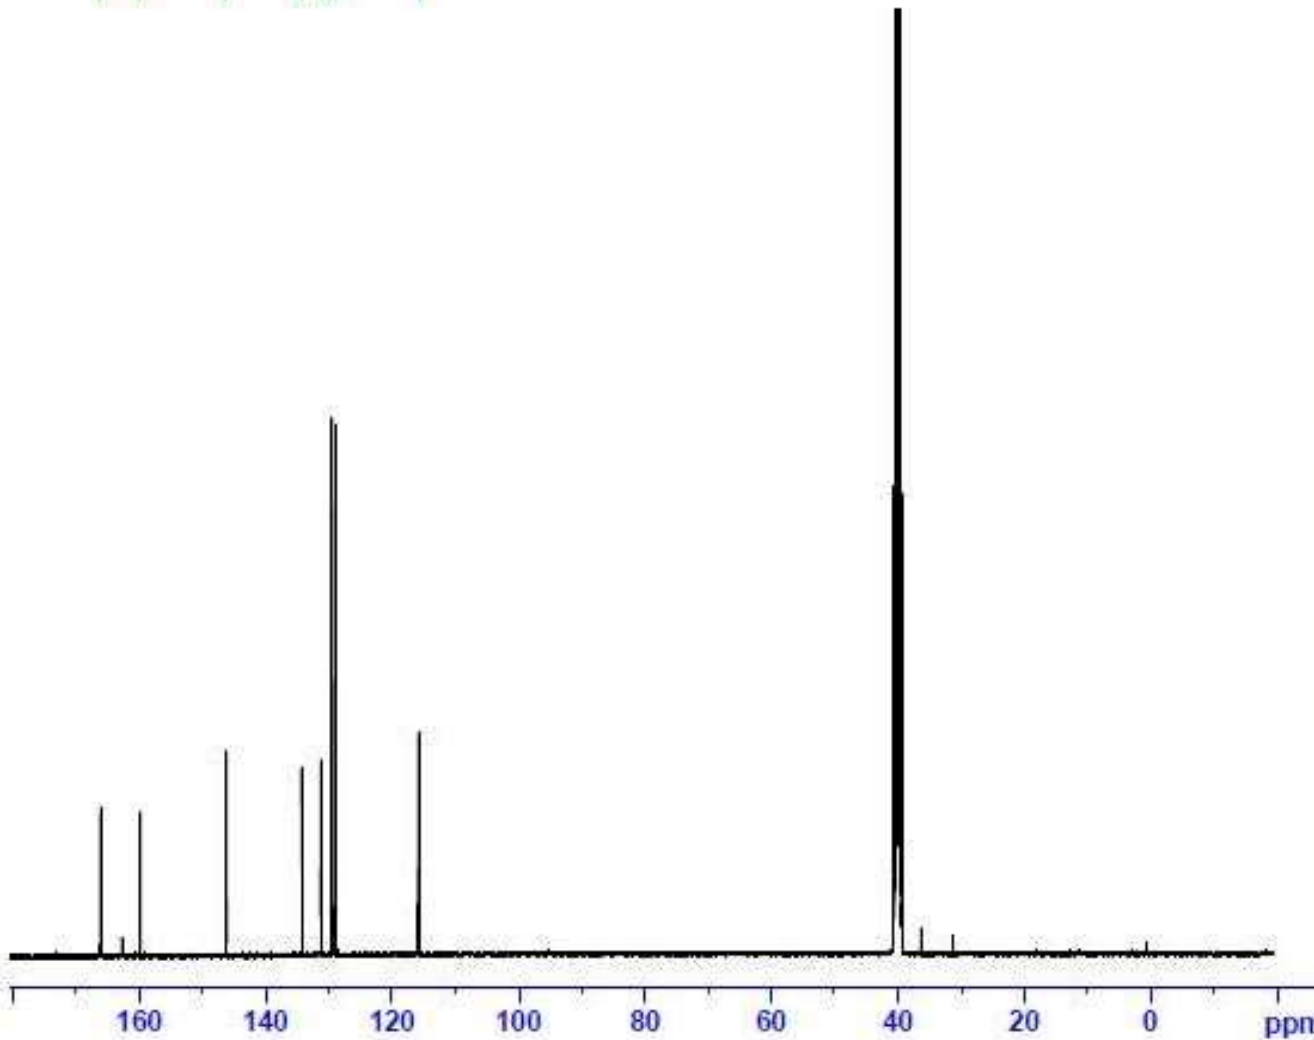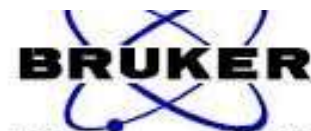

```
NAME           Moh RX
EXPNO           400
PROCNO          1
Date_           20190529
Time            4.14
INSTRUM         spect
PROBHD          5 mm PABBO BB-
PULPROG         zgpg30
TD              65536
SOLVENT         DMSO
NS              12000
DS              4
SWH             24038.461 Hz
FIDRES          0.366798 Hz
AQ              1.3631988 sec
RG              203
EW              20.800 usec
DE              6.50 usec
TE              298.0 K
D1              2.00000000 sec
D11             0.03000000 sec
TD0             1
```

```
----- CHANNEL f1 -----
NUC1            13C
P1              9.90 usec
PL1             -1.90 dB
PL1W           56.02249908 W
SFO1           100.62282298 MHz
```

```
----- CHANNEL f2 -----
CPDPRG2        waltz65
NUC2            1H
PCPD2          60.00 usec
PL2            0.30 dB
PL12           15.40 dB
PL13           18.40 dB
PL2W           11.25229816 W
PL12W          0.34772930 W
PL13W          0.17427748 W
SFO2           400.1316005 MHz
SI             32768
SF             100.6127690 MHz
WDW            EM
SSB            0
LB             1.00 Hz
GB             0
PC             1.40
```

HRMS

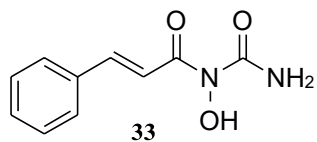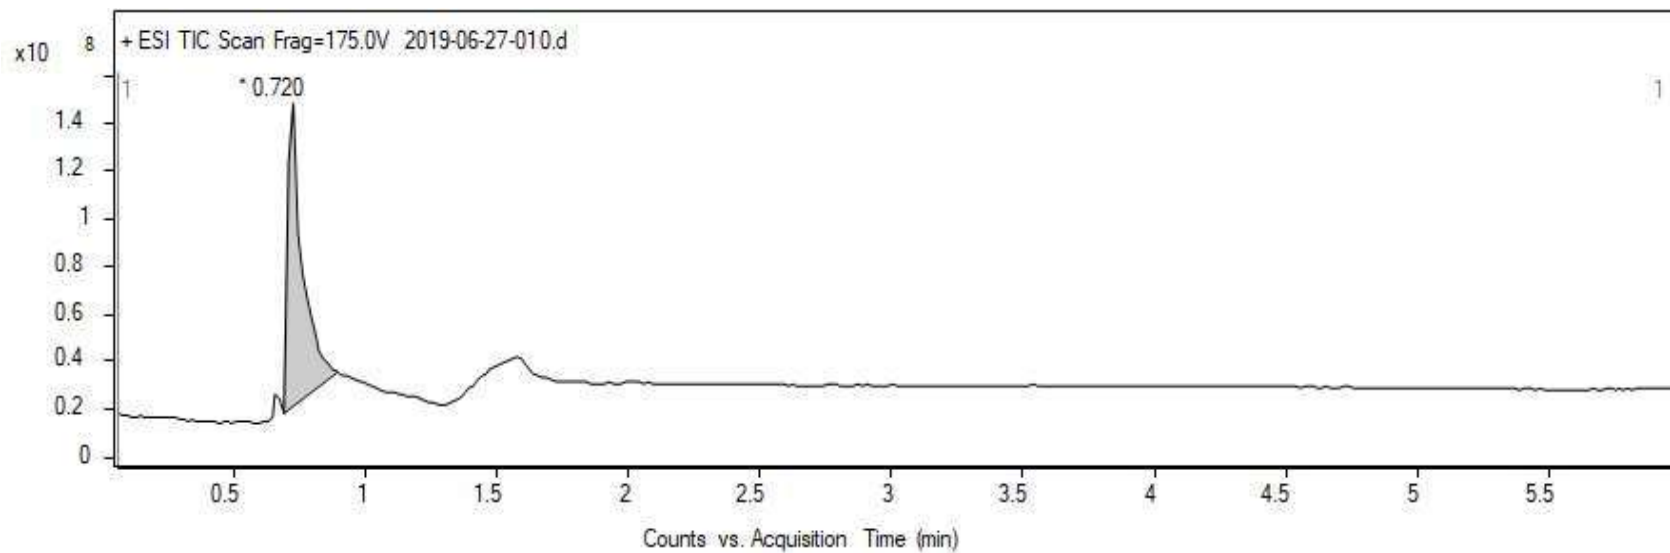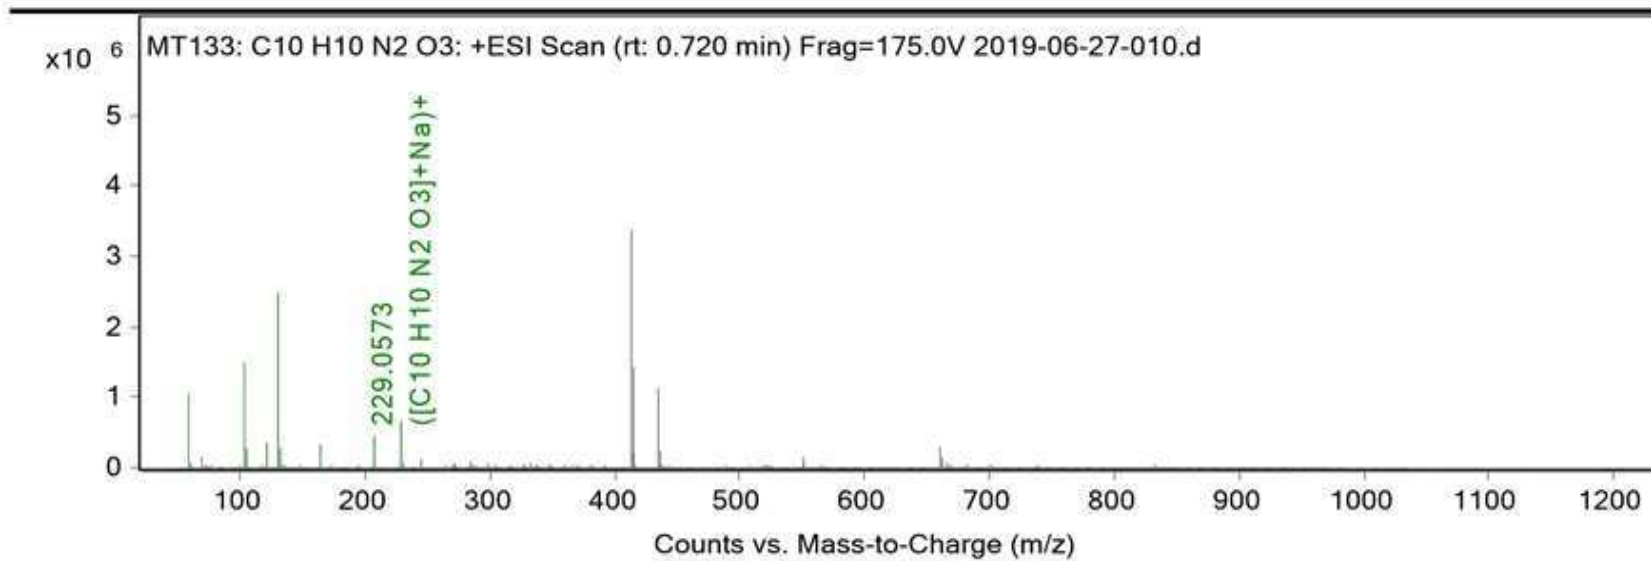

<sup>1</sup>H NMR

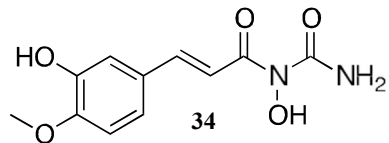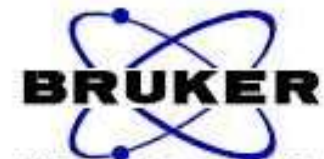

NAME Audrey Isabelle  
EXPNO 103  
PROCNO 1  
Date\_ 20190708  
Time 7.37  
INSTRUM spect  
PROBHD 5 mm DARRBO BB-  
PULPROG zg30  
TD 65536  
SOLVENT DMSO  
NS 16  
DS 2  
SWH 8223.685 Hz  
FIDRES 0.125483 Hz  
AQ 3.9846387 sec  
RG 101  
DW 60.800 usec  
DE 6.50 usec  
TE 298.0 K  
D1 1.00000000 sec  
TD0 1

----- CHANNEL F1 -----  
NUC1 1H  
P1 14.07 usec  
PL1 0.30 dB  
PL1W 11.25229836 W  
SFO1 400.1324710 MHz  
SI 32768  
SF 400.1300000 MHz  
WDW RM  
SSB 0  
LB 0.30 Hz  
GB 0  
PC 1.00

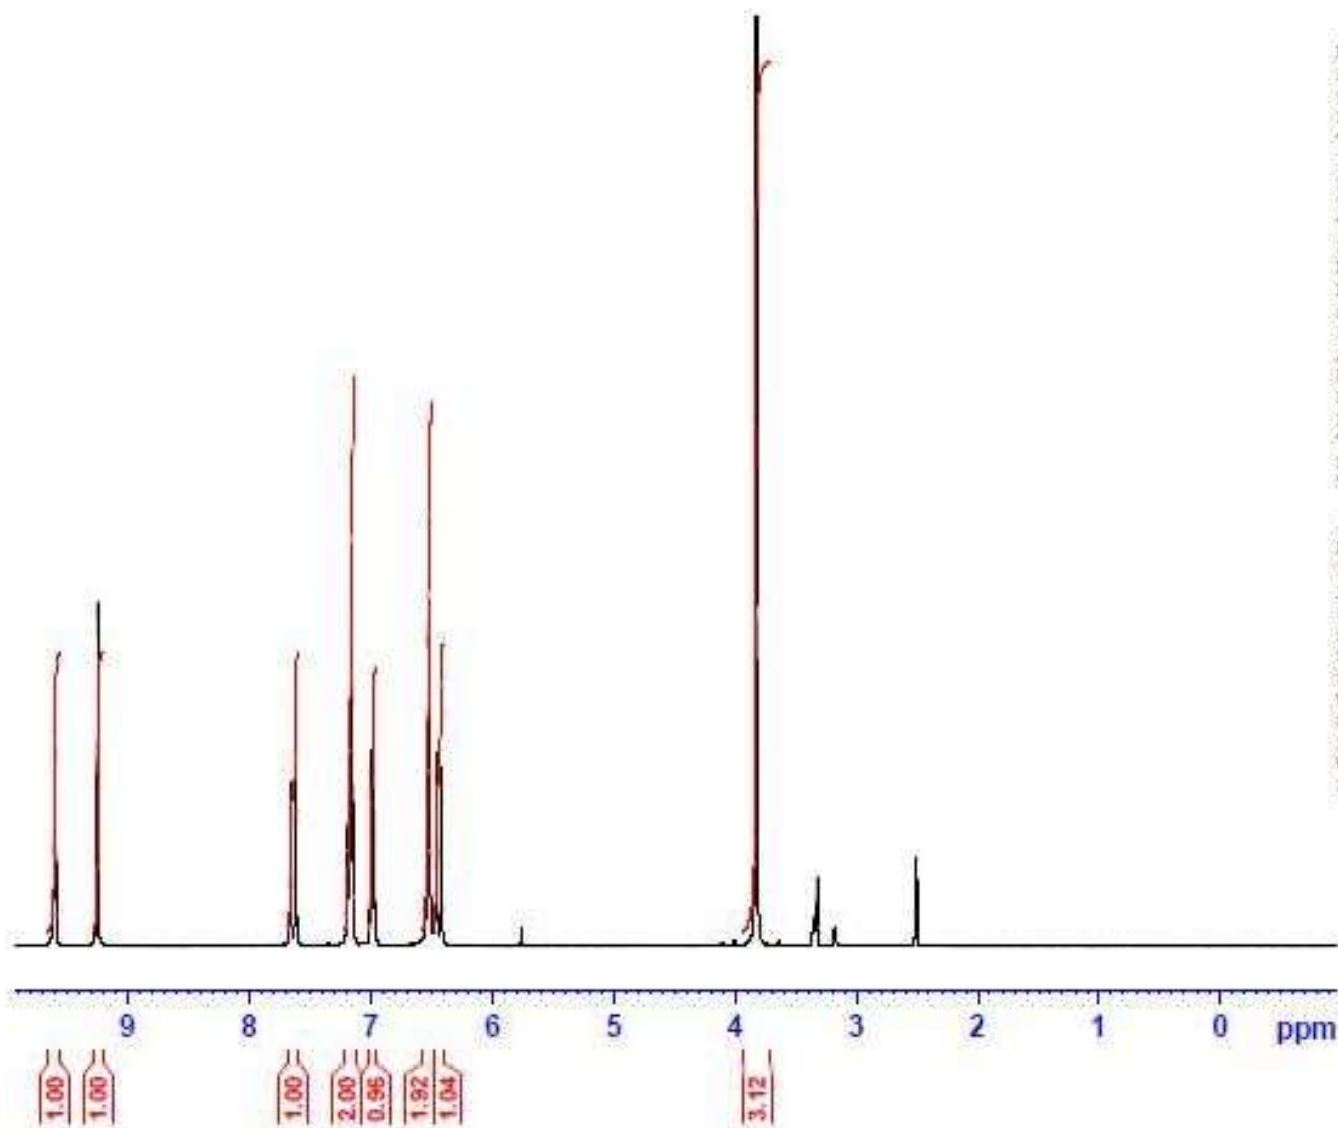

<sup>13</sup>C NMR

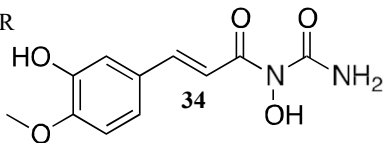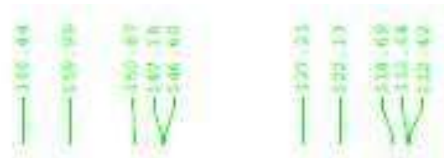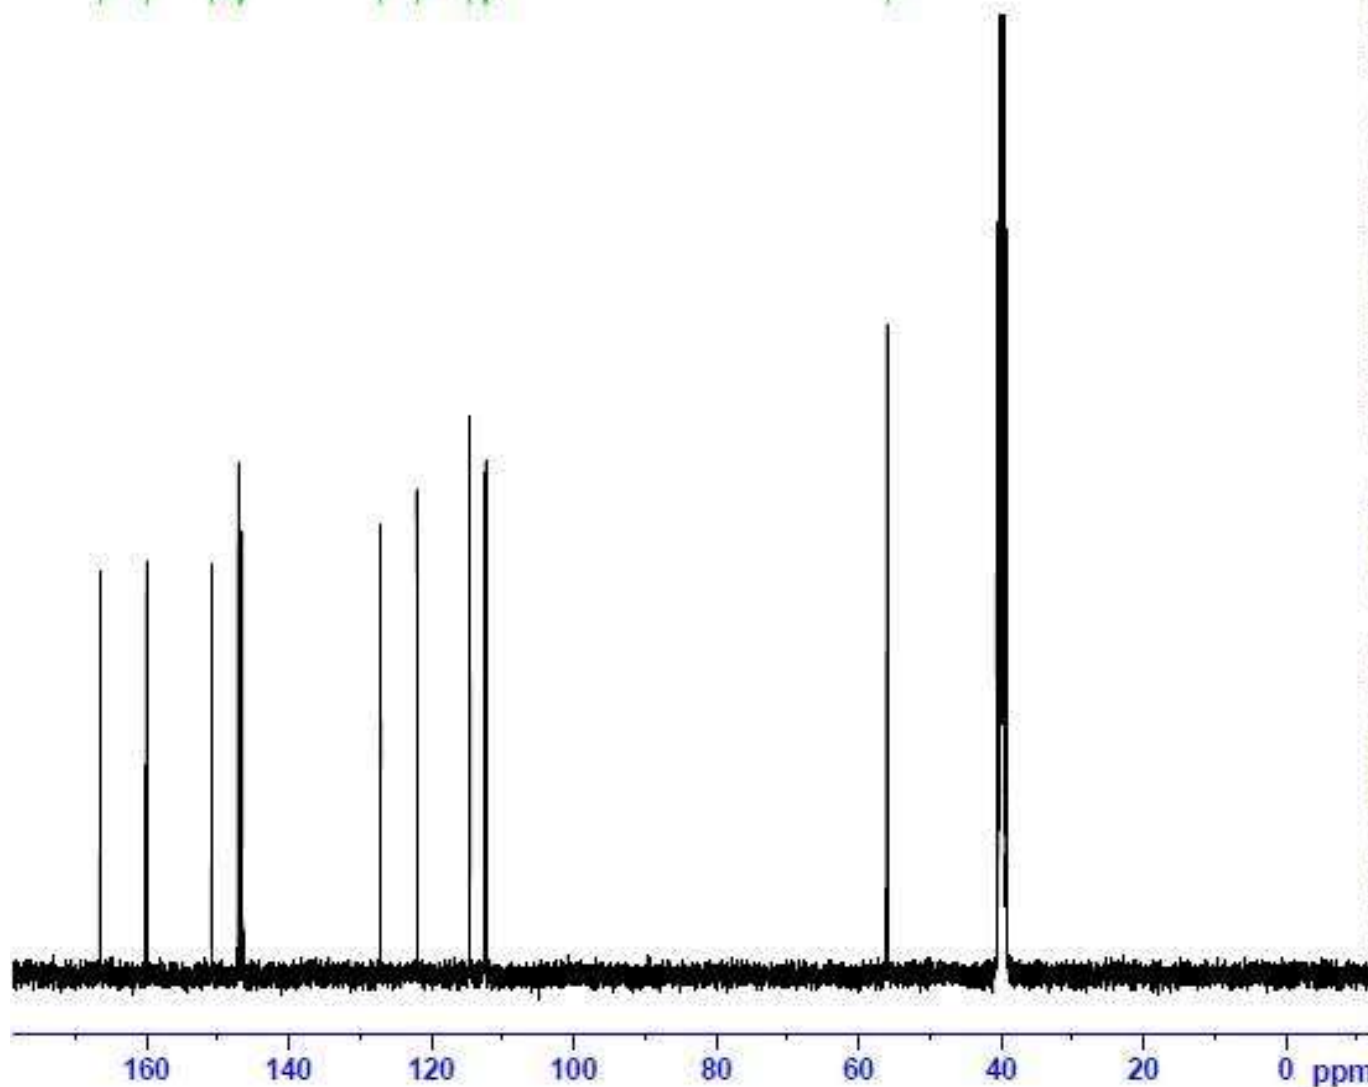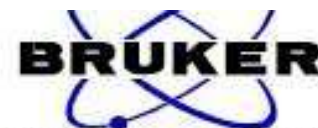

NAME Audrey Isabelle  
EXPNO 105  
PROCNO 1  
Date\_ 20190705  
Time 9.57  
INSTRUM spect  
PROBHD 5 mm PABBO BB-  
PULPROG zgpg30  
TD 65536  
SOLVENT DMSO  
NS 2136  
DS 4  
SWH 24038.461 Hz  
FIDRES 0.366798 Hz  
AQ 1.3631988 sec  
RG 203  
EW 20.800 usec  
DE 6.50 usec  
TE 298.0 K  
D1 2.0000000 sec  
D11 0.03000000 sec  
TD0 1

----- CHANNEL f1 -----  
NUC1 13C  
P1 9.90 usec  
PL1 -1.90 dB  
PL1W 56.02249908 W  
SFO1 100.6228298 MHz

----- CHANNEL f2 -----  
CPDPRG2 waltz65  
NUC2 1H  
PCPD2 80.00 usec  
PL2 0.30 dB  
PL12 15.40 dB  
PL13 18.40 dB  
PL2W 11.25229836 W  
PL12W 0.34772930 W  
PL13W 0.17427748 W  
SFO2 400.1316005 MHz  
SI 32768  
SF 100.6127690 MHz  
WDW EM  
SSB 0  
LB 1.00 Hz  
GB 0  
PC 1.40

HRMS

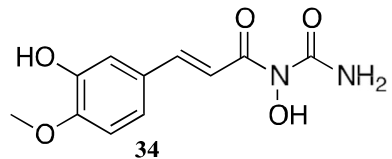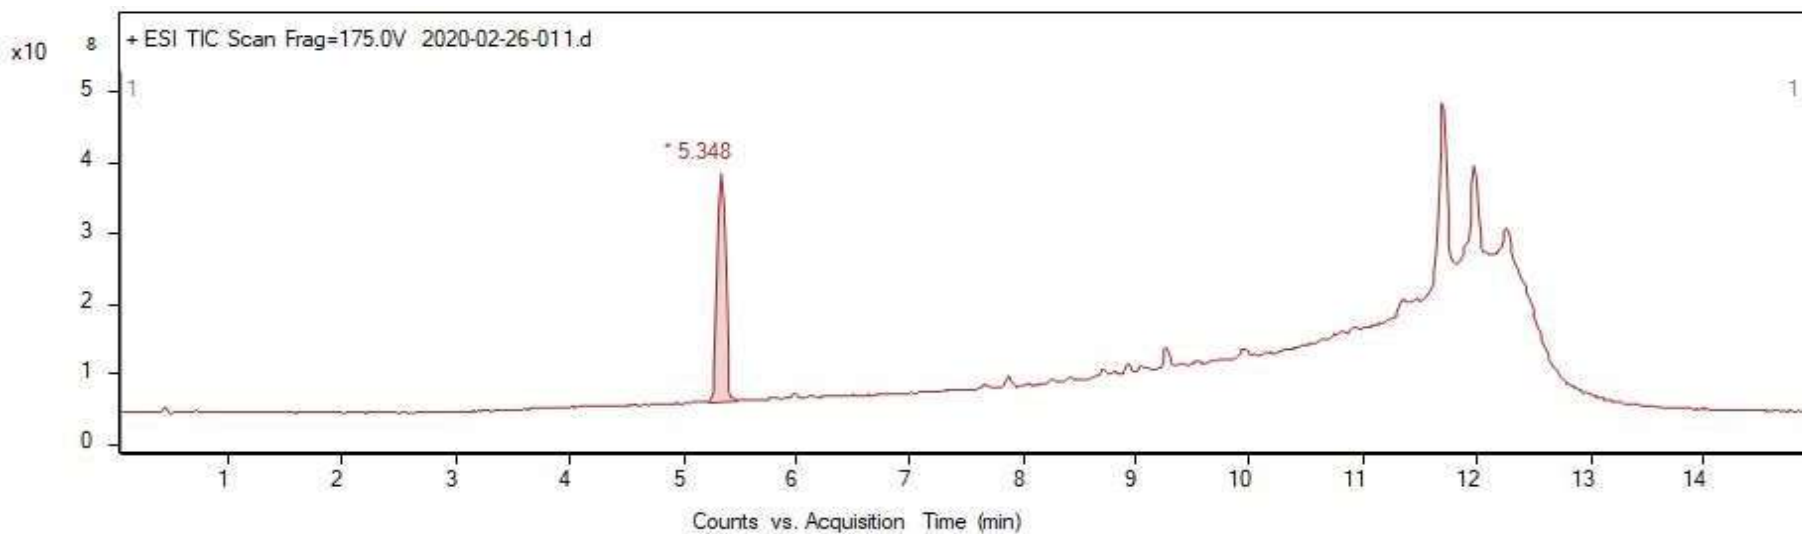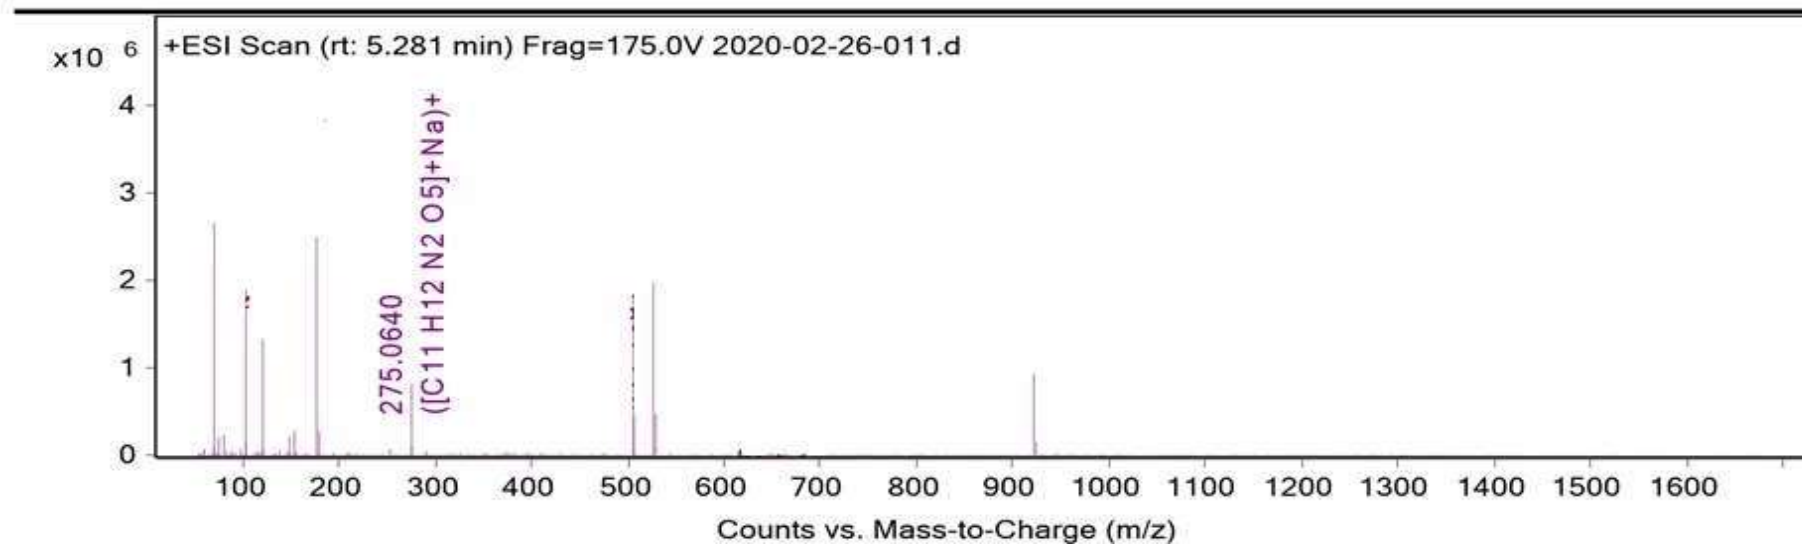

<sup>1</sup>H NMR

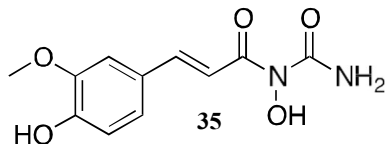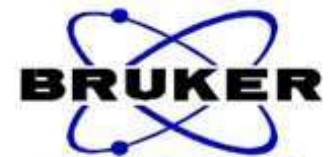

NAME Audrey Isabelle  
EXPNO 109  
PROCNO 1  
Date\_ 20190708  
Time 8.44  
INSTRUM spect  
PROBHD 5 mm PABBO BB-  
PULPROG zg30  
TD 65536  
SOLVENT DMSO  
NS 16  
DS 2  
SWH 8223.685 Hz  
FIDRES 0.125483 Hz  
AQ 3.9846387 sec  
RG 203  
DW 60.800 usec  
DE 6.50 usec  
TE 298.0 K  
D1 1.00000000 sec  
TD0 1

\*\*\*\*\* CHANNEL f1 \*\*\*\*\*  
NUC1 1H  
P1 14.07 usec  
PL1 0.30 dB  
PL1W 11.25229836 W  
SFO1 400.1324710 MHz  
SI 32768  
SF 400.1300000 MHz  
WDW EM  
SSB 0  
LB 0.30 Hz  
GB 0  
PC 1.00

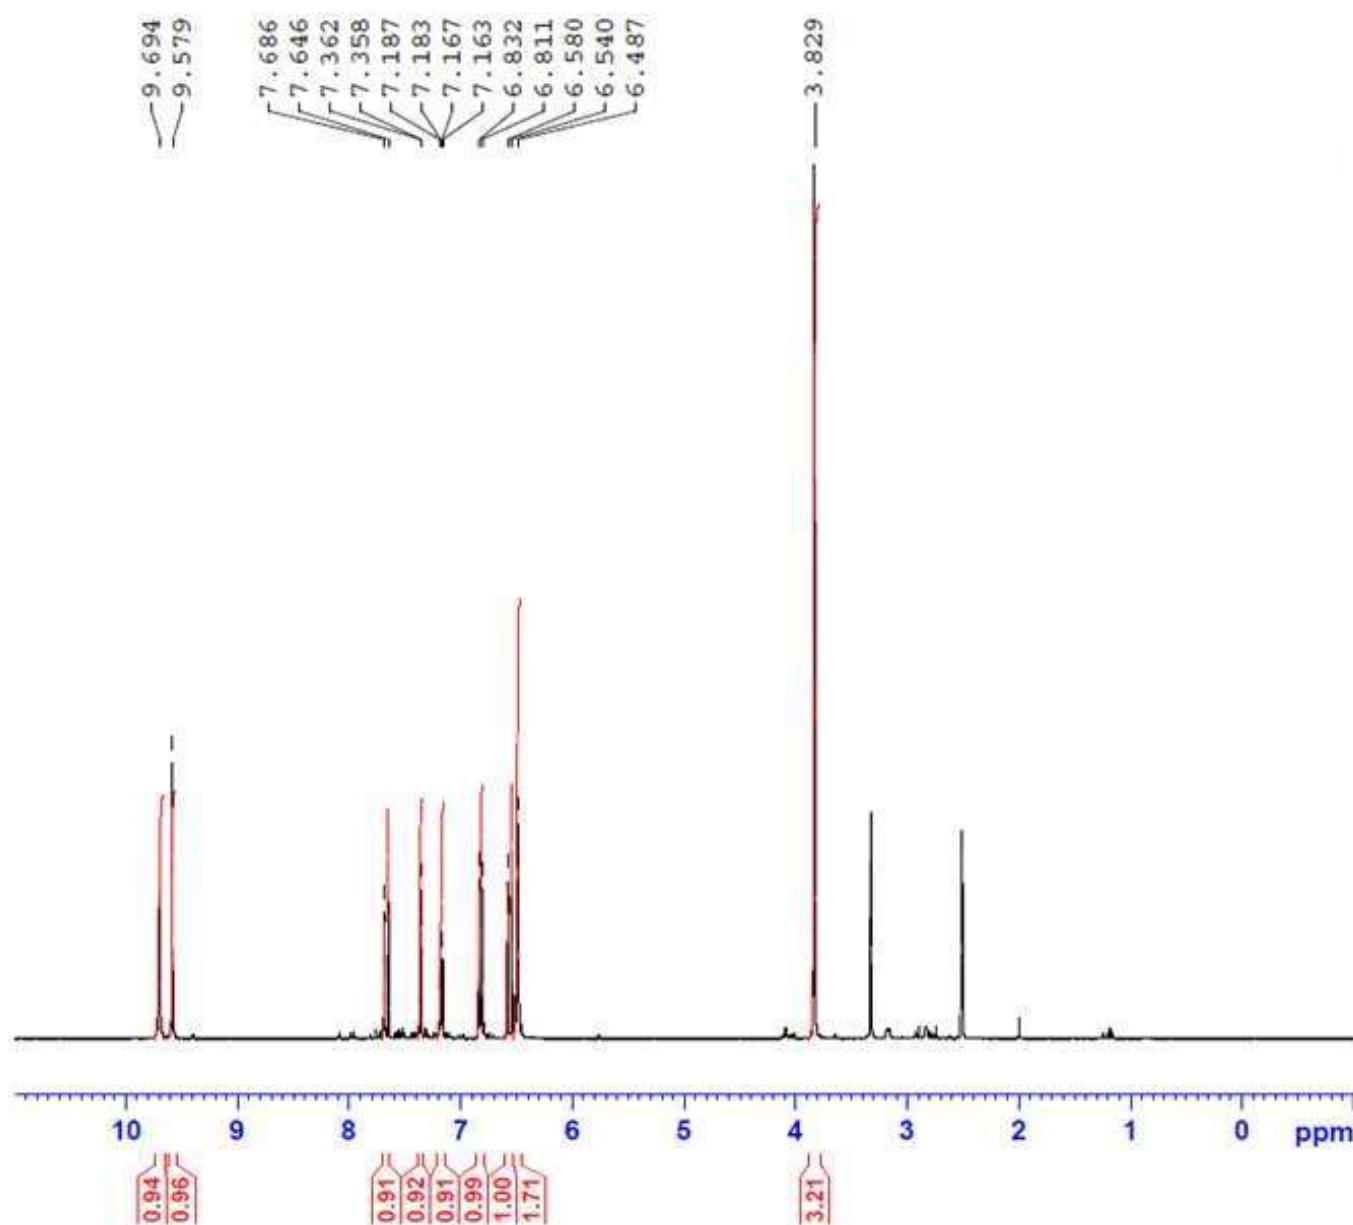

<sup>13</sup>C NMR

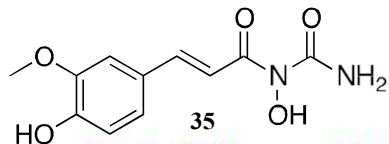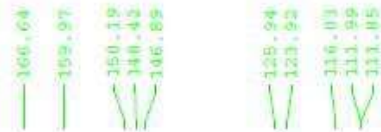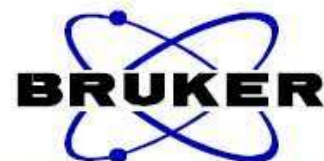

NAME Audrey Isabelle  
EXPNO 111  
PROCNO 1  
Date\_ 20190708  
Time\_ 10.57  
INSTRUM spect  
PROBHD 5 mm PABBO BB-  
PULPROG zgpg30  
TD 65536  
SOLVENT DMSO  
NS 2086  
DS 4  
SWH 24038.461 Hz  
FIDRES 0.366798 Hz  
AQ 1.3631988 sec  
RG 203  
DW 20.800 usec  
DE 6.50 usec  
TE 298.0 K  
D1 2.00000000 sec  
D11 0.03000000 sec  
TD0 1

==== CHANNEL f1 =====  
NUC1 13C  
P1 9.90 usec  
PL1 -1.90 dB  
PL1W 56.02249908 W  
SFO1 100.6228298 MHz

==== CHANNEL f2 =====  
CPDPRG2 waltz65  
NUC2 1H  
PCPD2 80.00 usec  
PL2 0.30 dB  
PL12 15.40 dB  
PL13 18.40 dB  
PL2W 11.25229836 W  
PL12W 0.34772930 W  
PL13W 0.17427748 W  
SFO2 400.1316005 MHz  
SI 32768  
SF 100.6127690 MHz  
WDW EM  
SSB 0  
LB 1.00 Hz  
GB 0  
PC 1.40

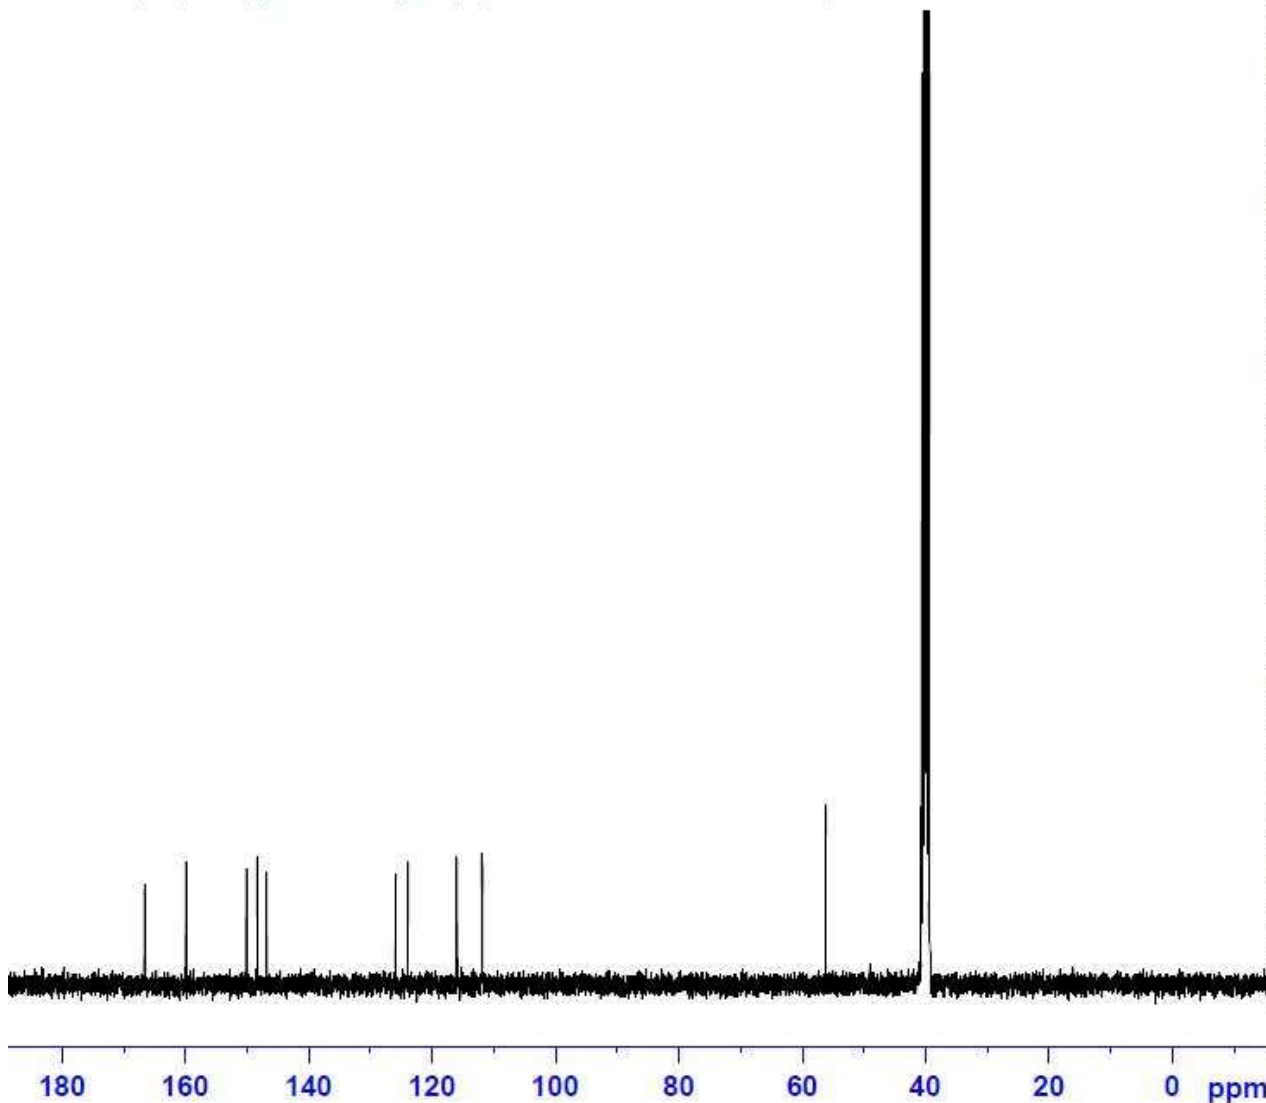



HRMS

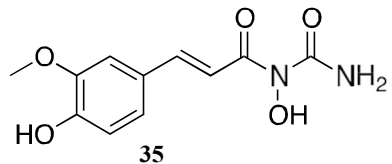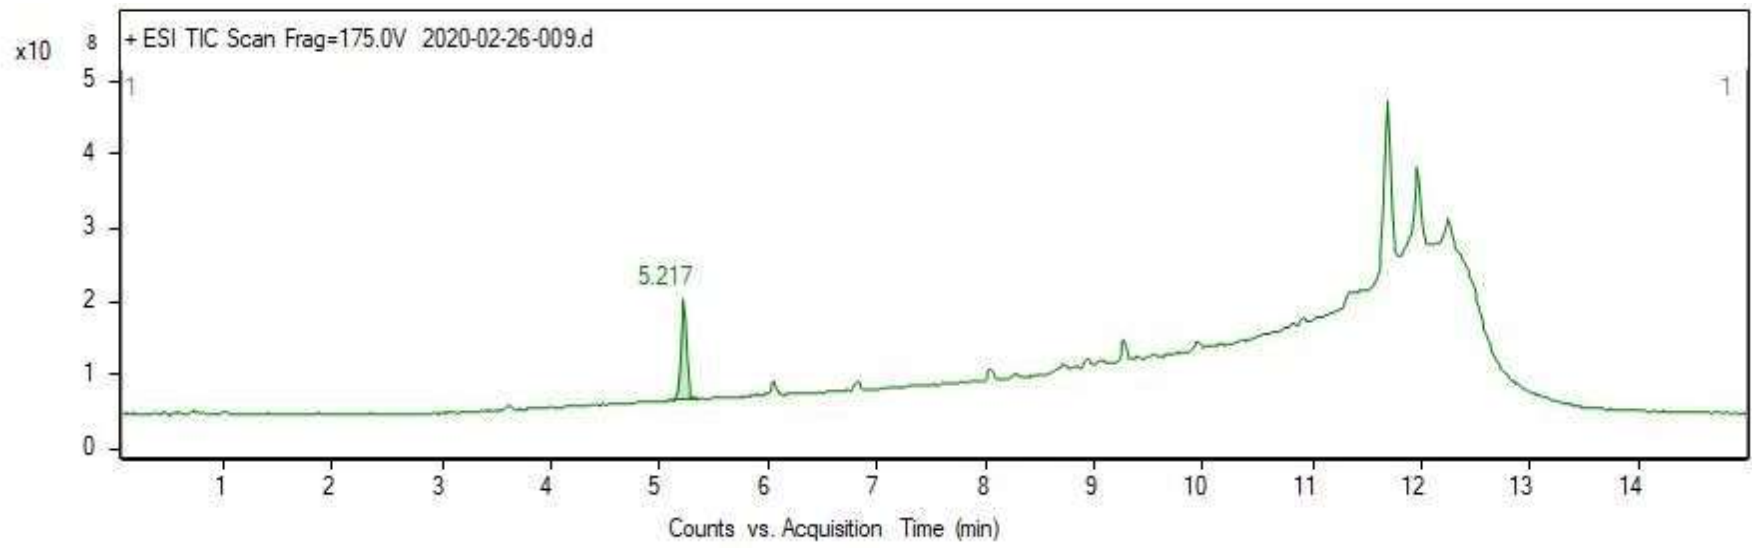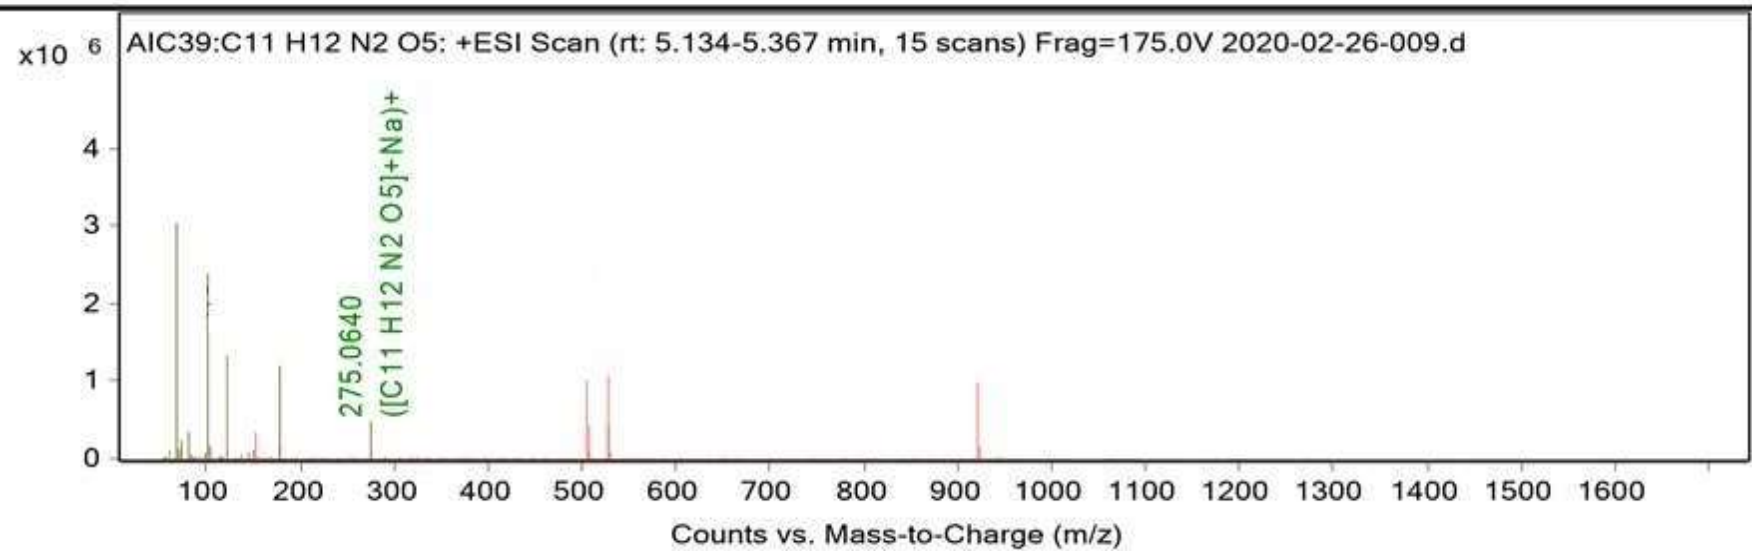



<sup>1</sup>H NMR

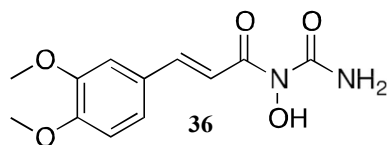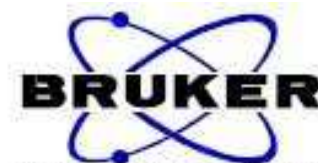

```
NAME      Audrey Isabelle
EXPNO     94
PROCNO    1
Date_     20190628
Time      16.15
INSTRUM   spect
PROBHD    5 mm DABBO BB-
PULPROG   zg30
TD        65536
SOLVENT   DMSO
NS        16
DS        2
SWH       8223.685 Hz
FIDRES    0.125483 Hz
AQ        3.9846387 sec
RG        114
DW        60.800 usec
DE        6.50 usec
TE        298.0 K
D1        1.0000000 sec
TDO       1
```

```
----- CHANNEL f1 -----
NUC1      1H
P1        14.07 usec
PL1       0.30 dB
PL1W      11.25229836 W
SFO1      400.1324710 MHz
SI        32768
SF        400.1300000 MHz
WDW       EM
SSB       0
LB        0.30 Hz
GB        0
PC        1.00
```

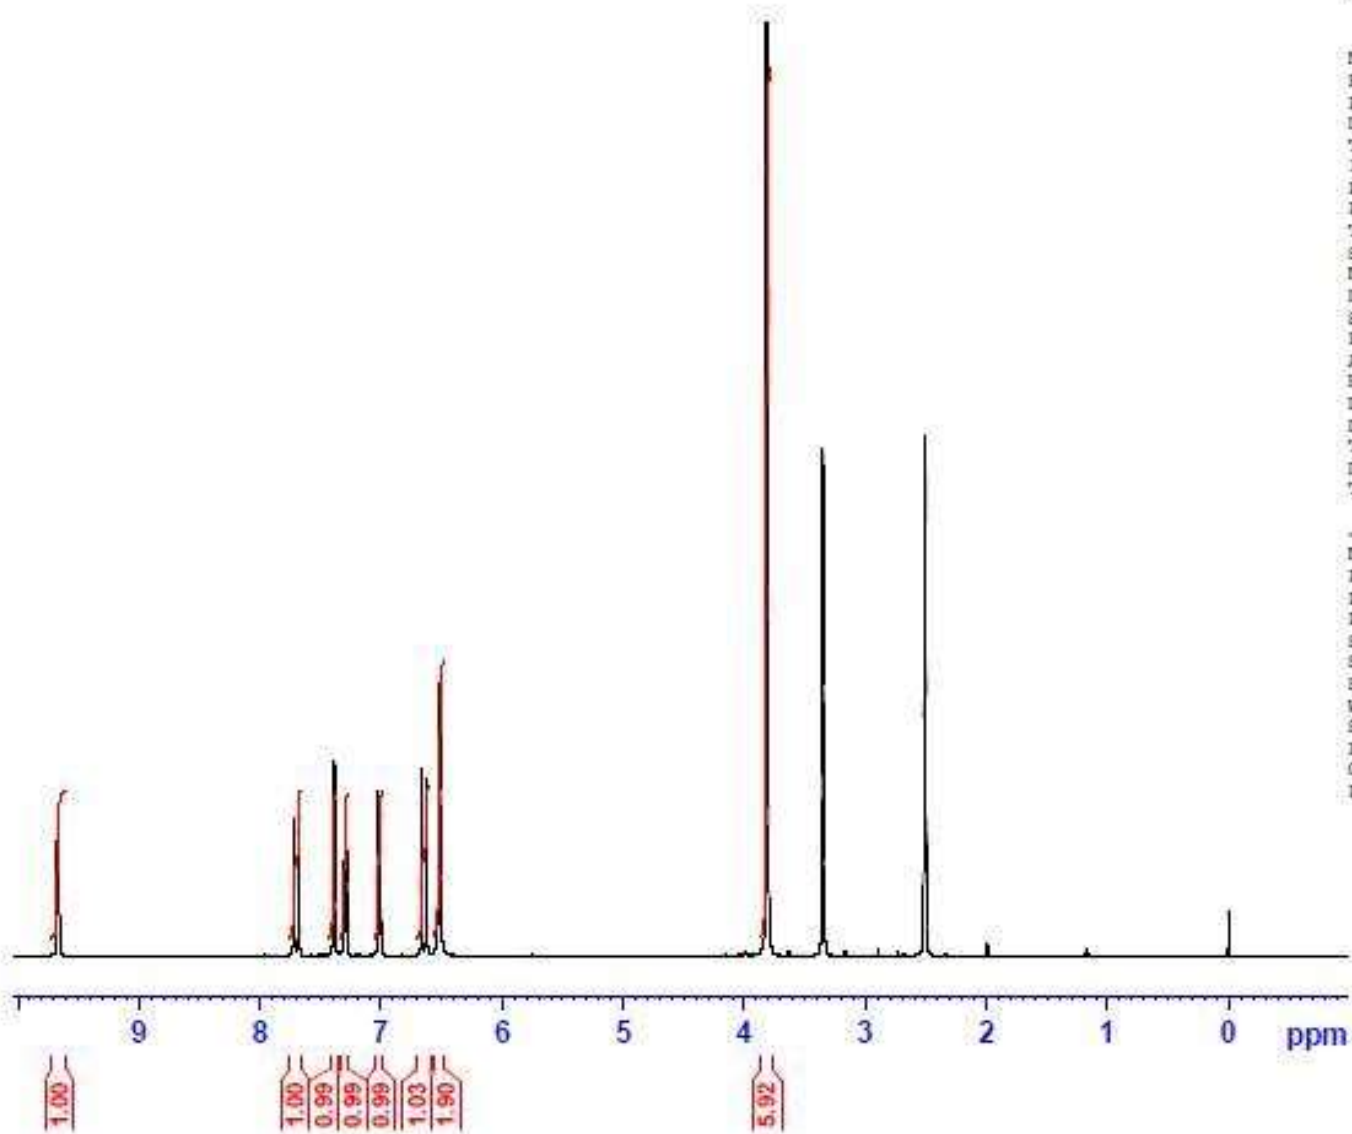

<sup>13</sup>C NMR

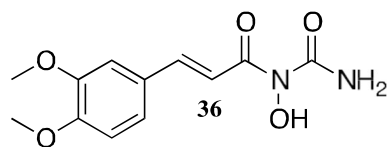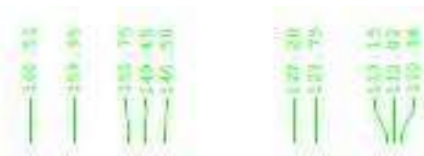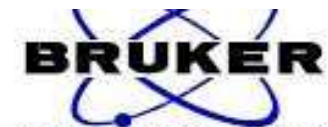

NAME Audrey Isabelle  
EXPNO 96  
PROCNO 1  
Date\_ 20190629  
Time 2.00  
INSTRUM spect  
PROBHD 5 mm DABBO BB-  
PULPROG zgpg30  
TD 65536  
SOLVENT DMSO  
NS 10000  
DS 4  
SWH 24038.461 Hz  
FIDRES 0.366798 Hz  
AQ 1.3631988 sec  
RG 203  
DW 20.800 usec  
DE 6.50 usec  
TE 298.0 K  
D1 2.00000000 sec  
D11 0.03000000 sec  
TD0 1

----- CHANNEL f1 -----  
NUC1 13C  
P1 9.90 usec  
PL1 -1.90 dB  
PL1W 56.02249908 W  
SFO1 100.6228298 MHz

----- CHANNEL f2 -----  
CPDPRG2 waltz16S  
NUC2 1H  
PCPD2 80.00 usec  
PL2 0.30 dB  
PL12 15.40 dB  
PL13 18.40 dB  
PL2W 11.25229836 W  
PL12W 0.34772930 W  
PL13W 0.17427748 W  
SFO2 400.1316005 MHz  
SI 32768  
SF 100.6127690 MHz  
WDW EM  
SSB 0  
LB 1.00 Hz  
CB 0  
DC 1.40

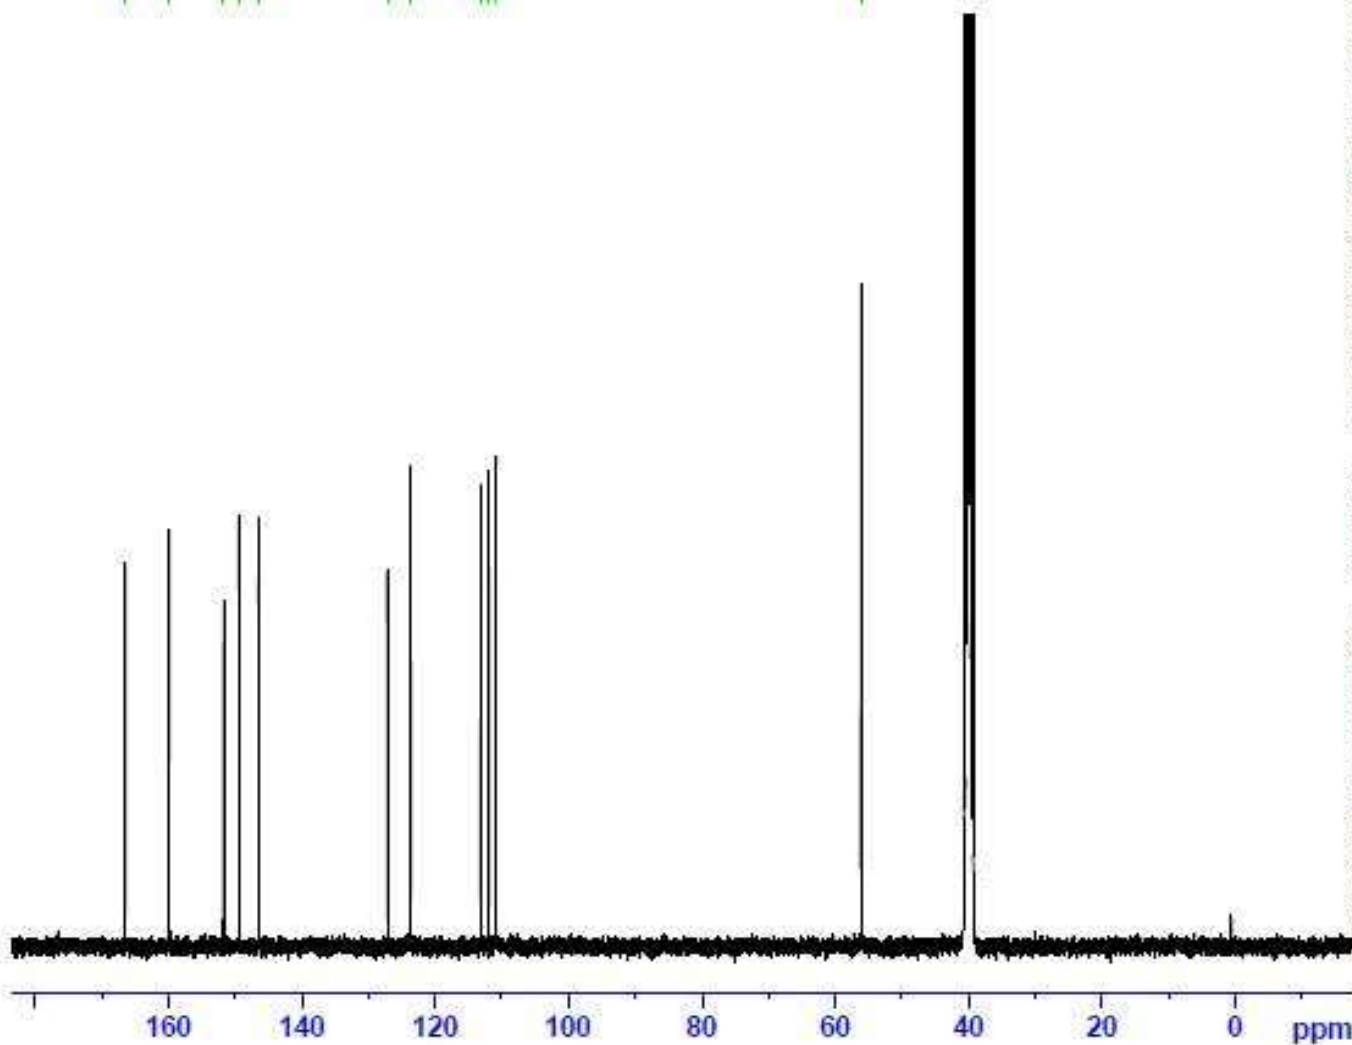

HRMS

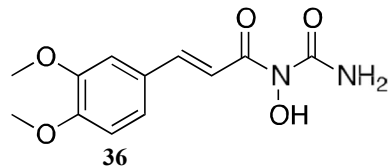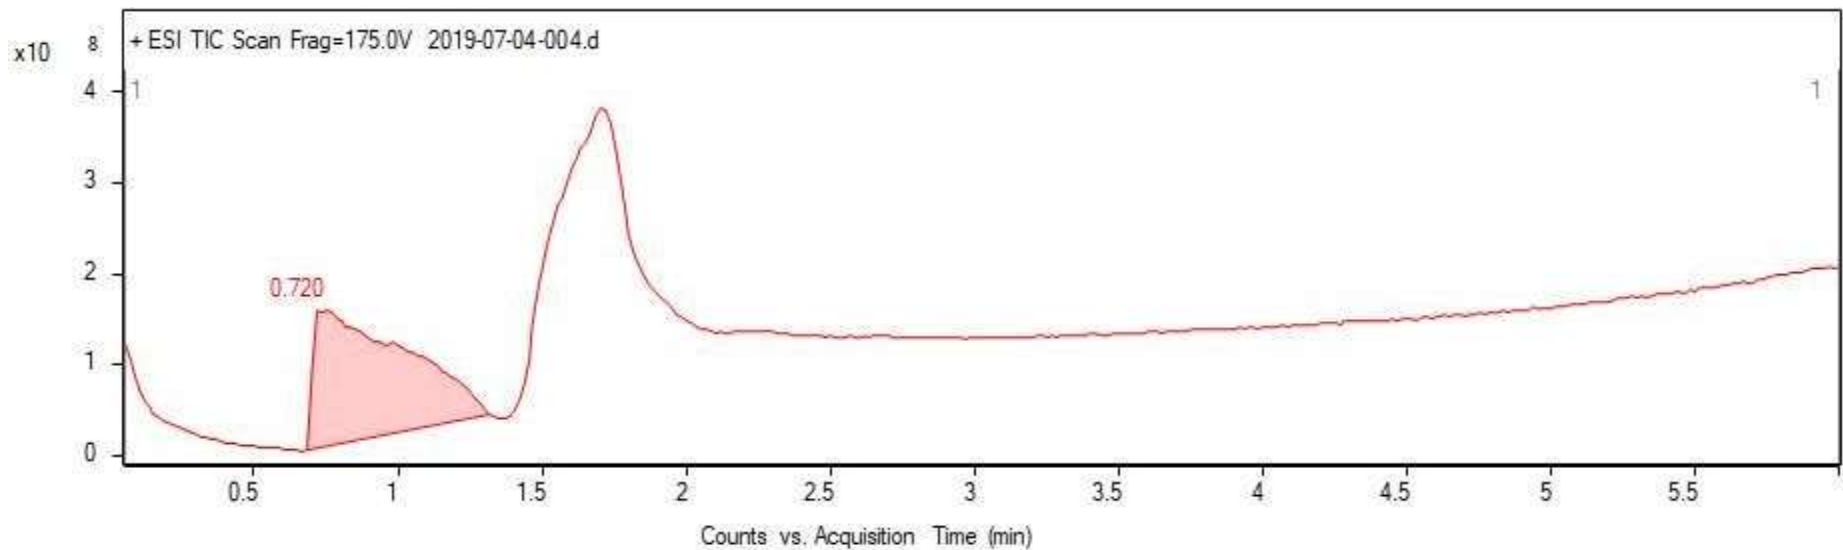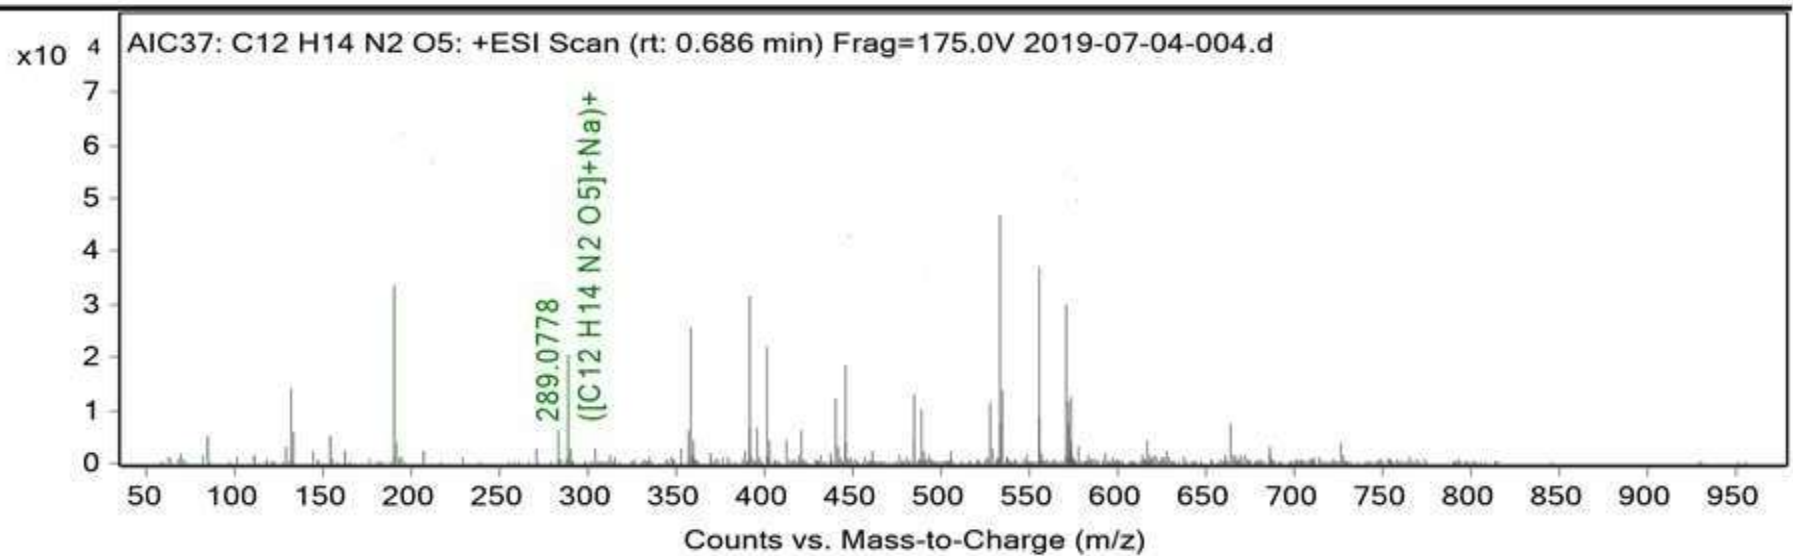

<sup>1</sup>H NMR

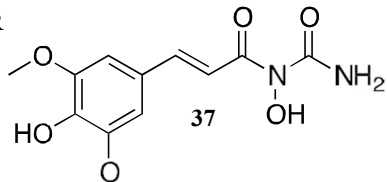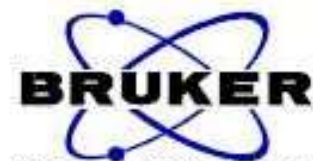

```
NAME      Audrey Isabelle
EXPNO     99
PROCNO    1
Date_     20190704
Time      8.17
INSTRUM   spect
PROBHD    5 mm PABBO BB-
PULPROG   zg30
TD        65536
SOLVENT   DMSO
NS        16
DS        2
SWH       8223.685 Hz
FIDRES    0.125483 Hz
AQ        3.9846387 sec
RG        114
DW        60.800 usec
DE        6.50 usec
TE        298.0 K
D1        1.00000000 sec
TD0       1
```

```
----- CHANNEL f1 -----
NUC1      1H
P1        14.07 usec
PL1       0.30 dB
PL1W      11.25229836 W
SFO1      400.1324710 MHz
SI        32768
SF        400.1300000 MHz
WDW       EM
SSB       0
LB        0.30 Hz
GB        0
PC        1.00
```

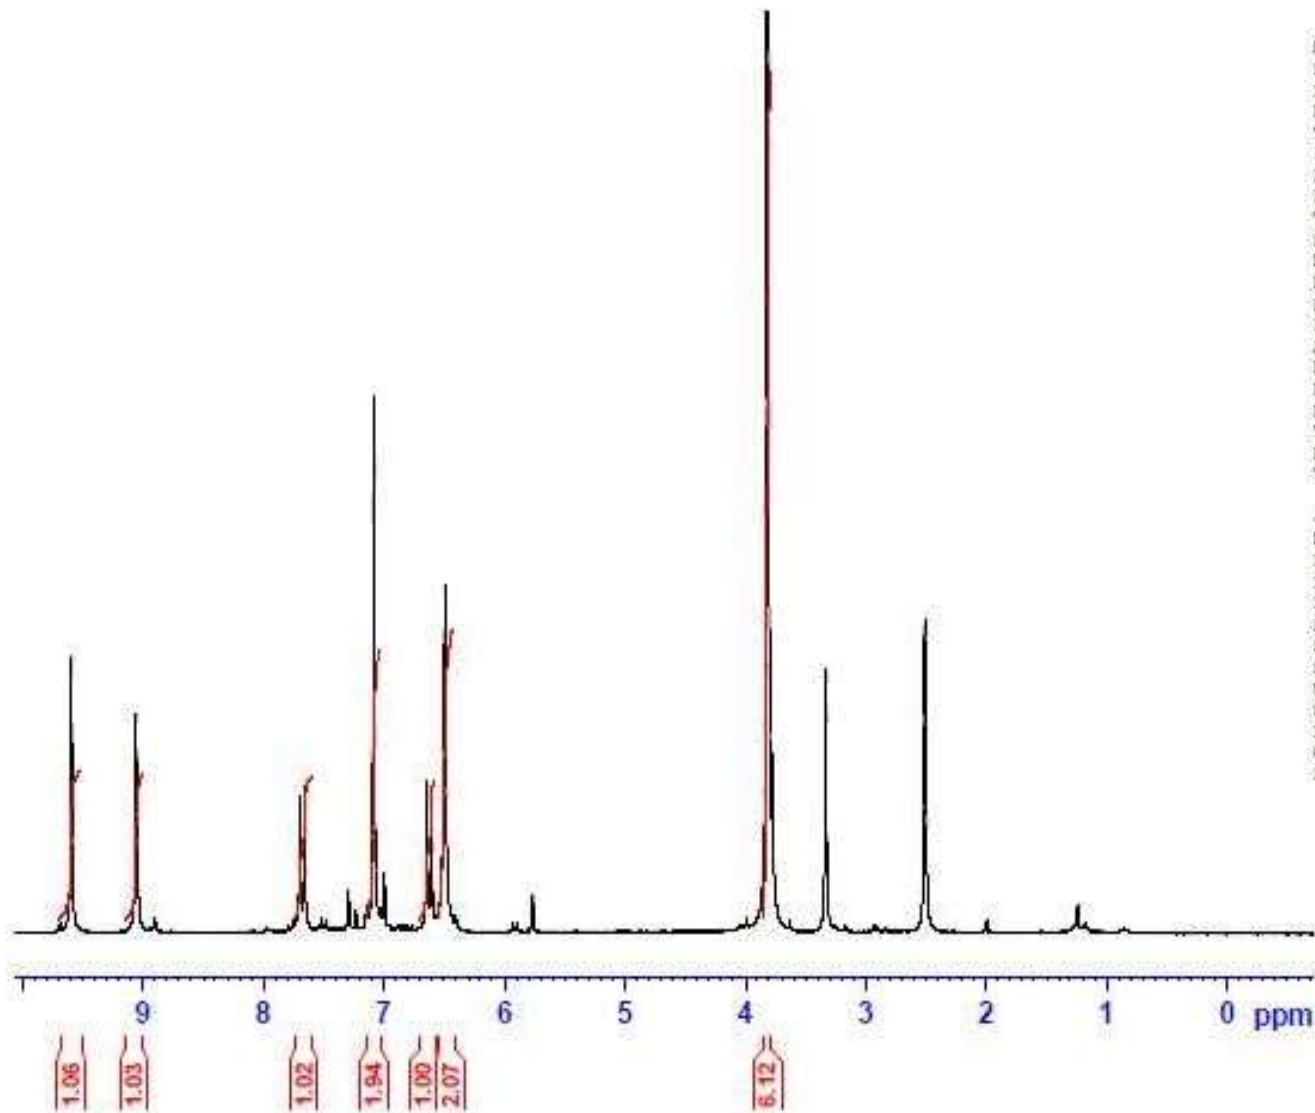

<sup>13</sup>C NMR

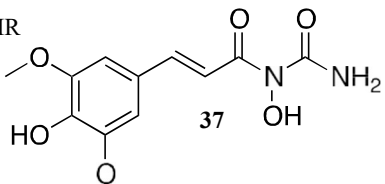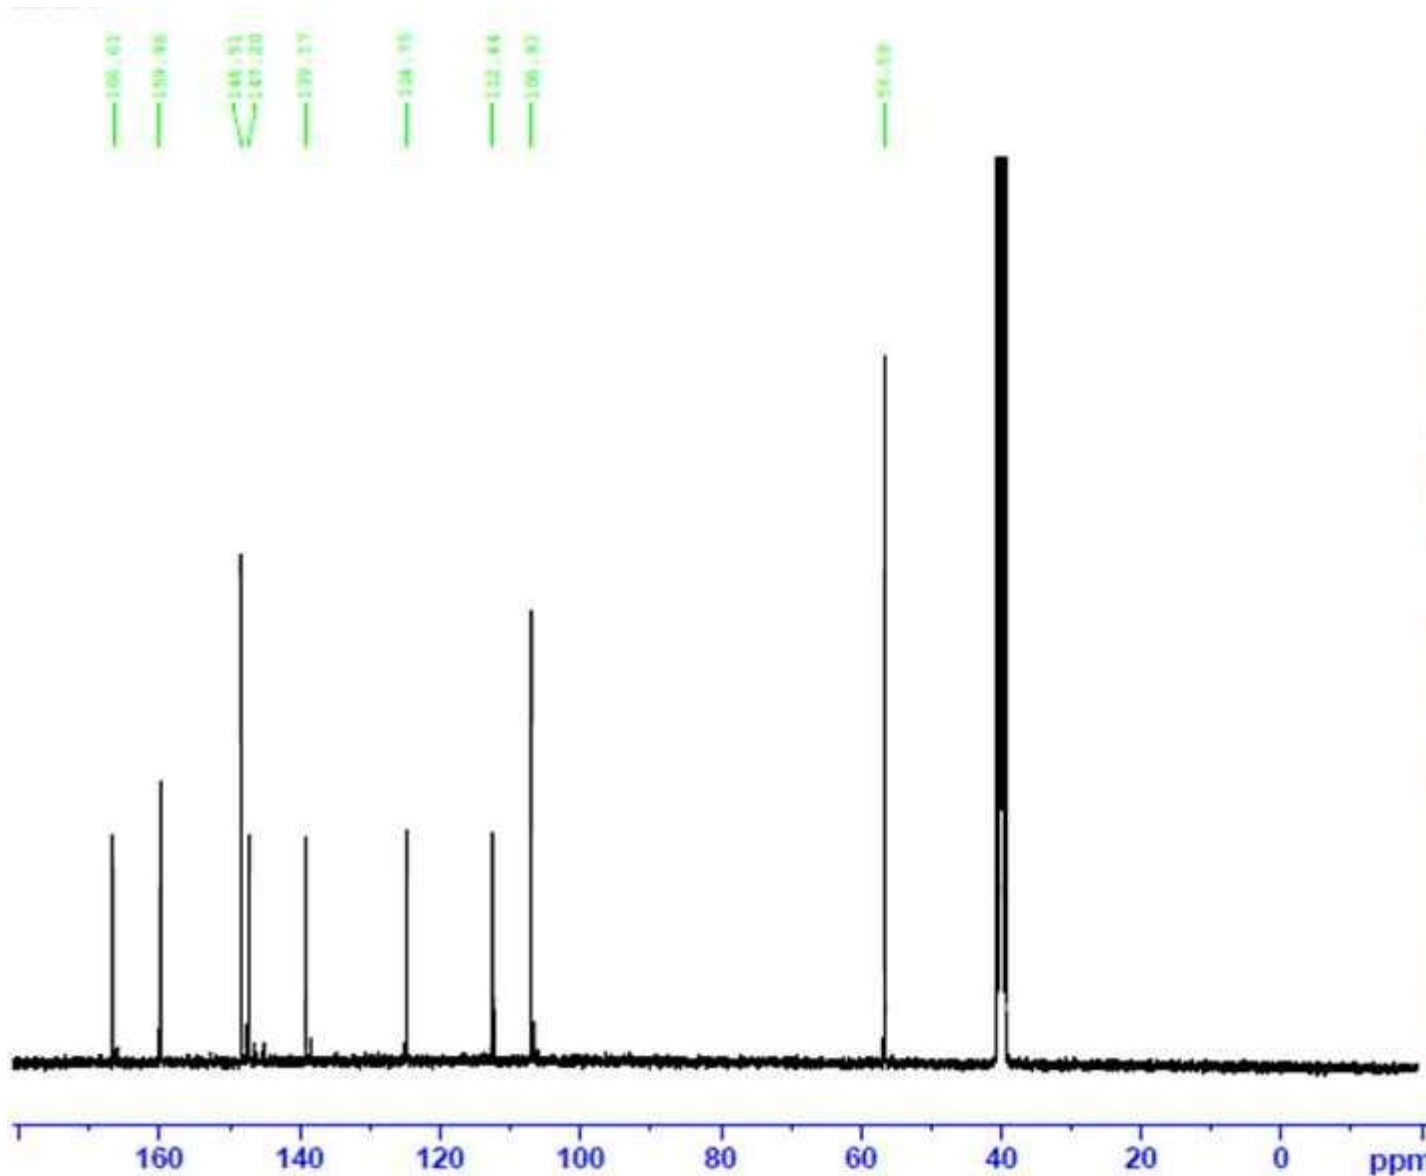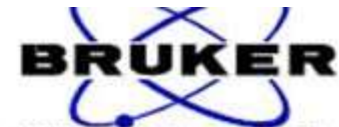

NAME Audrey Isabelle  
EXDNO 102  
PROCNO 1  
Date\_ 20190705  
Time\_ 0.27  
INSTRUM spect  
PROBHD 5 mm DABBO BB-  
PULPROG zgpg30  
TD 65536  
SOLVENT DMSO  
NS 10000  
DS 4  
SWH 24038.461 Hz  
FIDRES 0.366798 Hz  
AQ 1.3631988 sec  
RG 203  
DW 20.800 usec  
DE 6.50 usec  
TE 298.0 K  
D1 2.00000000 sec  
D11 0.03000000 sec  
TD0 1

----- CHANNEL f1 -----  
NUC1 13C  
P1 9.90 usec  
PL1 -1.90 dB  
PL1W 56.02249908 W  
SFO1 100.6228298 MHz

----- CHANNEL f2 -----  
CDDPRG2 waltz65  
NUC2 1H  
PCPD2 80.00 usec  
PL2 0.30 dB  
PL12 15.40 dB  
PL13 18.40 dB  
PL2W 11.25229836 W  
PL12W 0.34772930 W  
PL13W 0.17427748 W  
SFO2 400.1316005 MHz  
SI 32768  
SF 100.6127690 MHz  
WDW EM  
SSB 0  
LB 1.00 Hz  
GB 0  
PC 1.40

HRMS

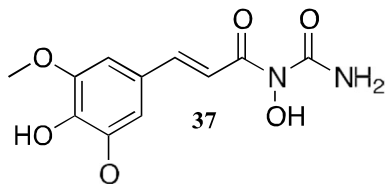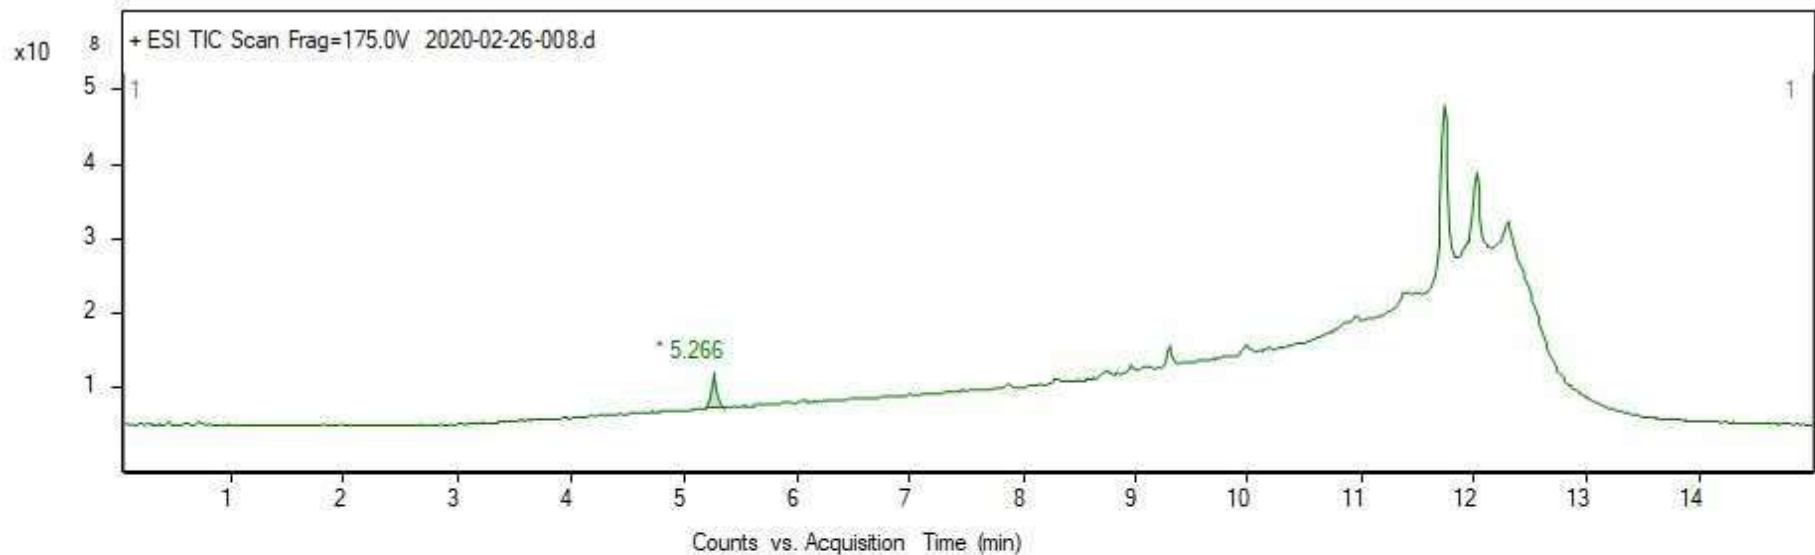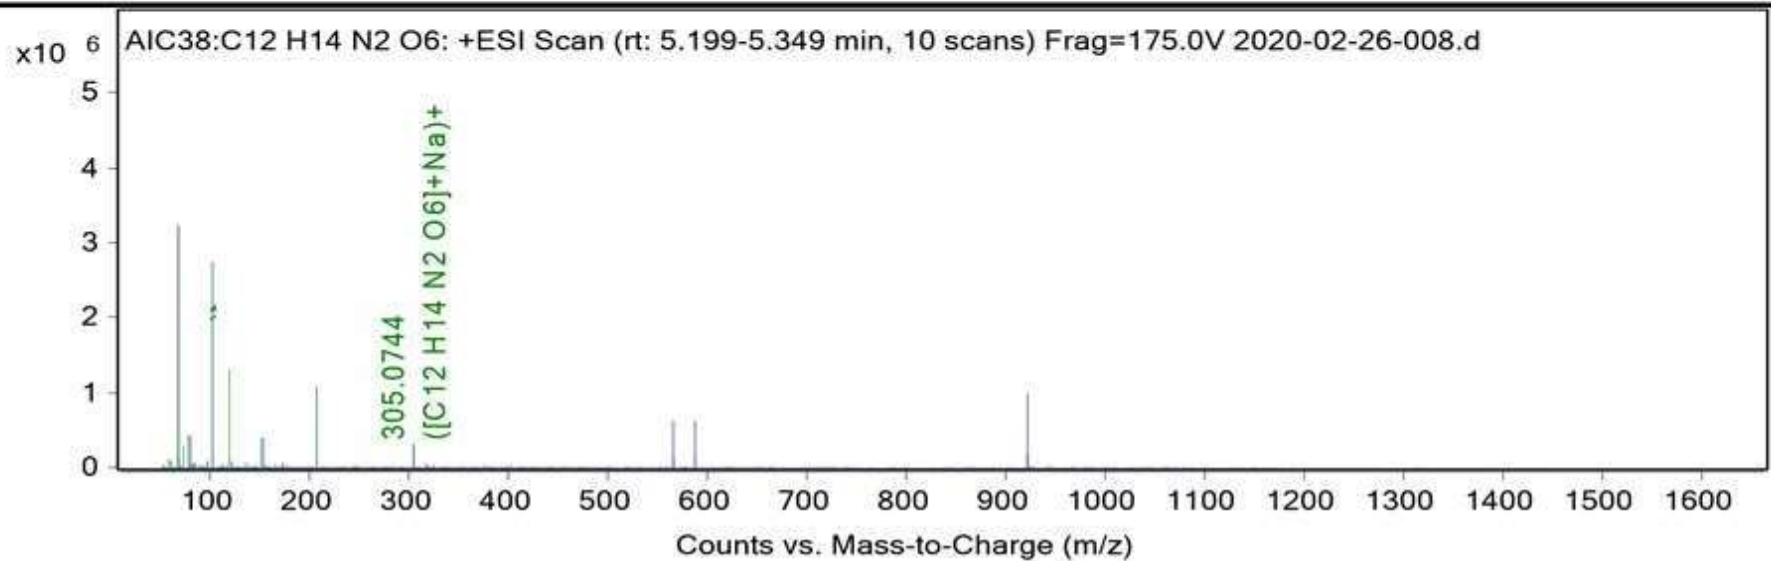

<sup>1</sup>H NMR

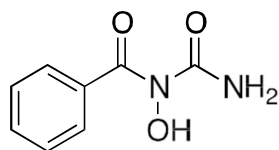

38

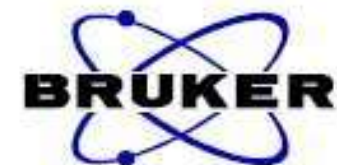

```
NAME           Moh RX
EXPNO           407
PROCNO          1
Date_           20190618
Time            8.51
INSTRUM         spect
PROBHD          5 mm PABBO BB-
PULPROG         zg30
TD              65536
SOLVENT         Acetone
NS              16
DS              2
SWH             8223.685 Hz
FIDRES         0.125483 Hz
AQ             3.9846387 sec
RG             114
DW             60.800 usec
DE             6.50 usec
TE             298.0 K
D1             1.00000000 sec
TD0            1
```

```
----- CHANNEL F1 -----
NUC1            1H
P1              14.07 usec
PL1             0.30 dB
PL1W           11.25229836 W
SFO1           400.1324710 MHz
SI             32768
SF             400.1300000 MHz
WDW             EM
SSB             0
LB             0.30 Hz
GB             0
PC             1.00
```

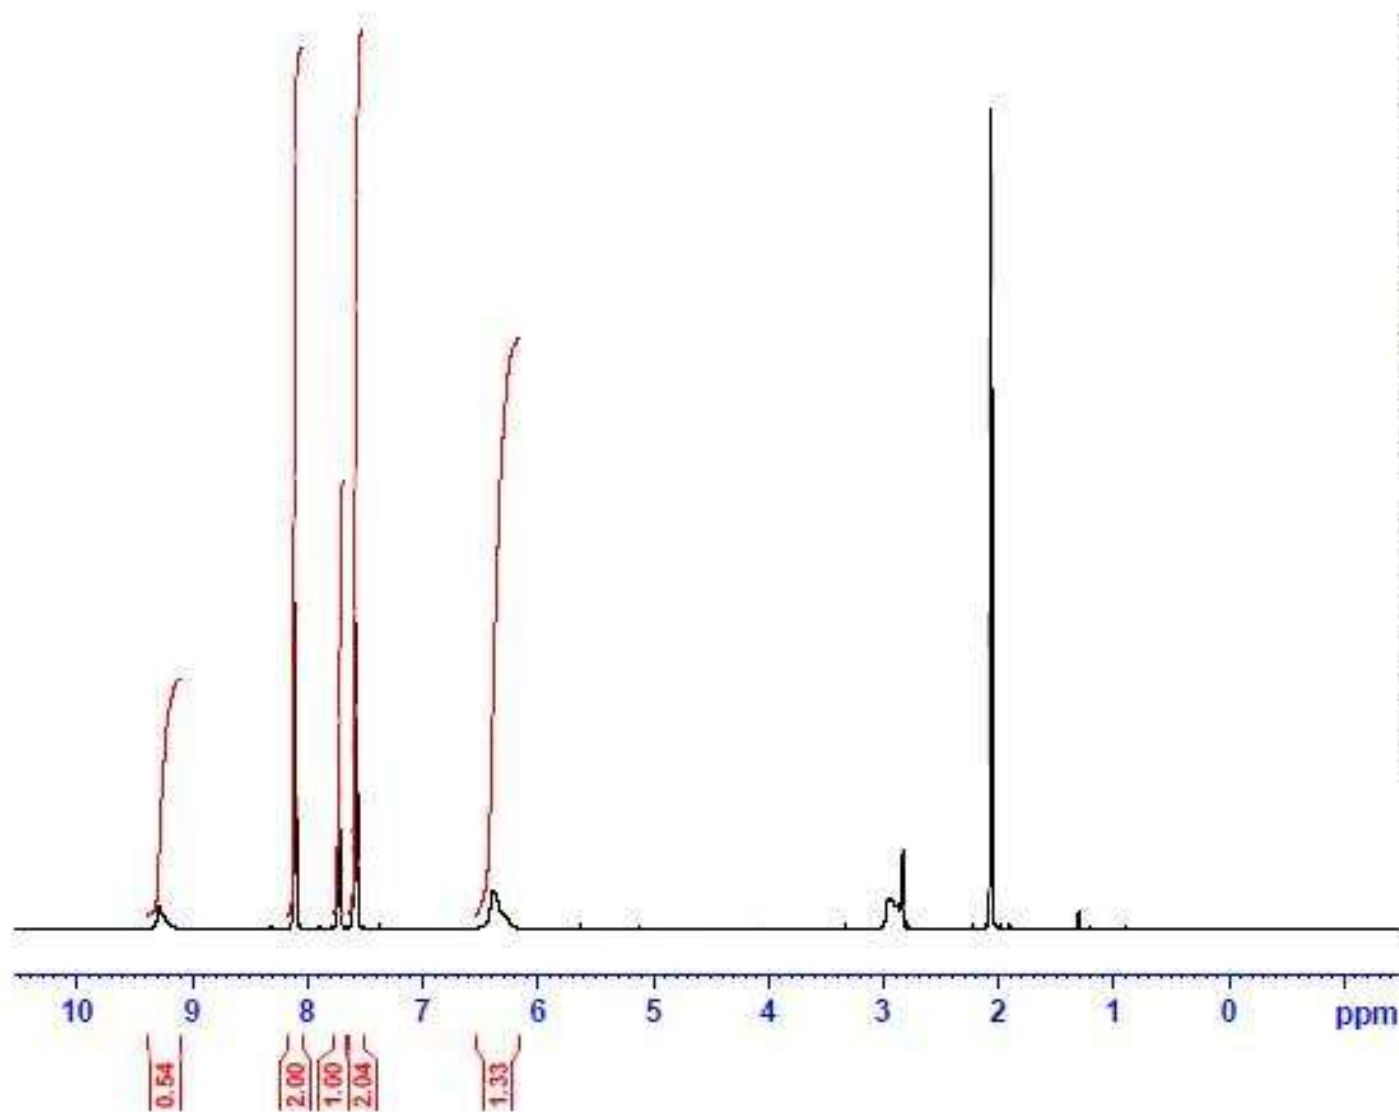



<sup>13</sup>C NMR

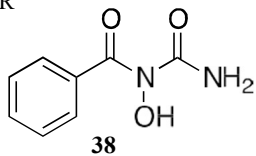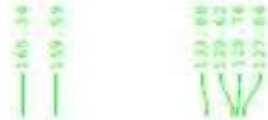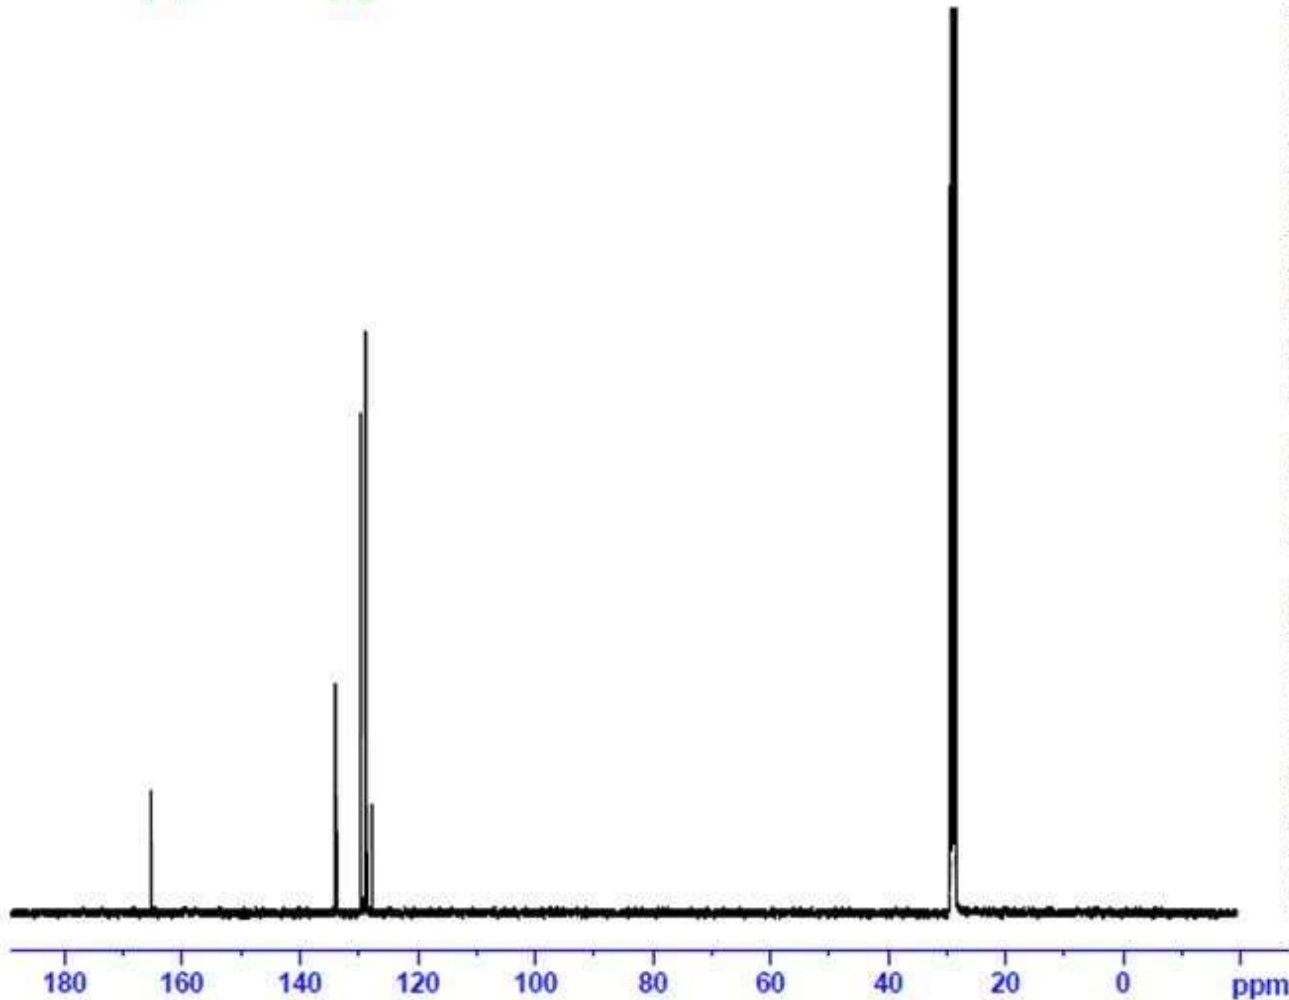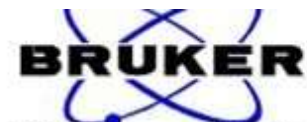

NAME Moh RX  
EXPNO 408  
PROCNO 1  
Date\_ 20190618  
Time\_ 13.47  
INSTRUM spect  
PROBHD 5 mm PASSO BB-  
PULPROG zgpg30  
TD 65536  
SOLVENT Acetone  
NS 5000  
DS 4  
SWH 24038.461 Hz  
FIDRES 0.366798 Hz  
AQ 1.3631988 sec  
RG 203  
DW 20.800 usec  
DE 6.50 usec  
TE 298.0 K  
D1 2.00000000 sec  
D11 0.03000000 sec  
TD0 1

----- CHANNEL f1 -----  
NUC1 13C  
P1 9.90 usec  
PL1 -1.90 dB  
PL1W 56.02249908 W  
SFO1 100.6228298 MHz

----- CHANNEL f2 -----  
CPDPRG2 waltz65  
NUC2 1H  
PCPD2 80.00 usec  
PL2 0.30 dB  
PL12 15.40 dB  
PL13 18.40 dB  
PL2W 11.25229836 W  
PL12W 0.34772930 W  
PL13W 0.17427748 W  
SFO2 400.1316005 MHz  
S1 32768  
SF 100.6127690 MHz  
WDW EM  
SFB 0  
LB 1.00 Hz  
GB 0  
PC 1.40



HRMS

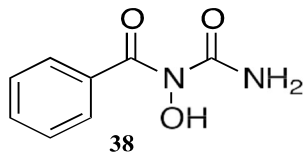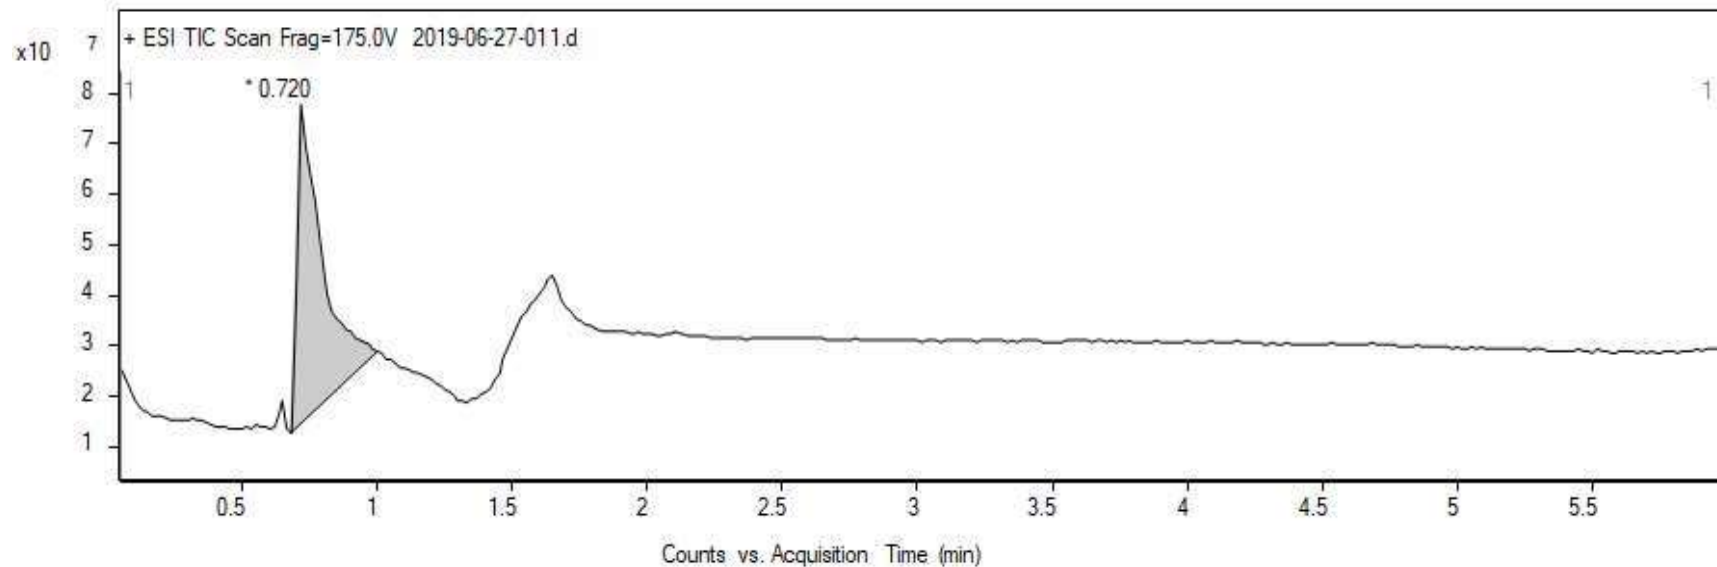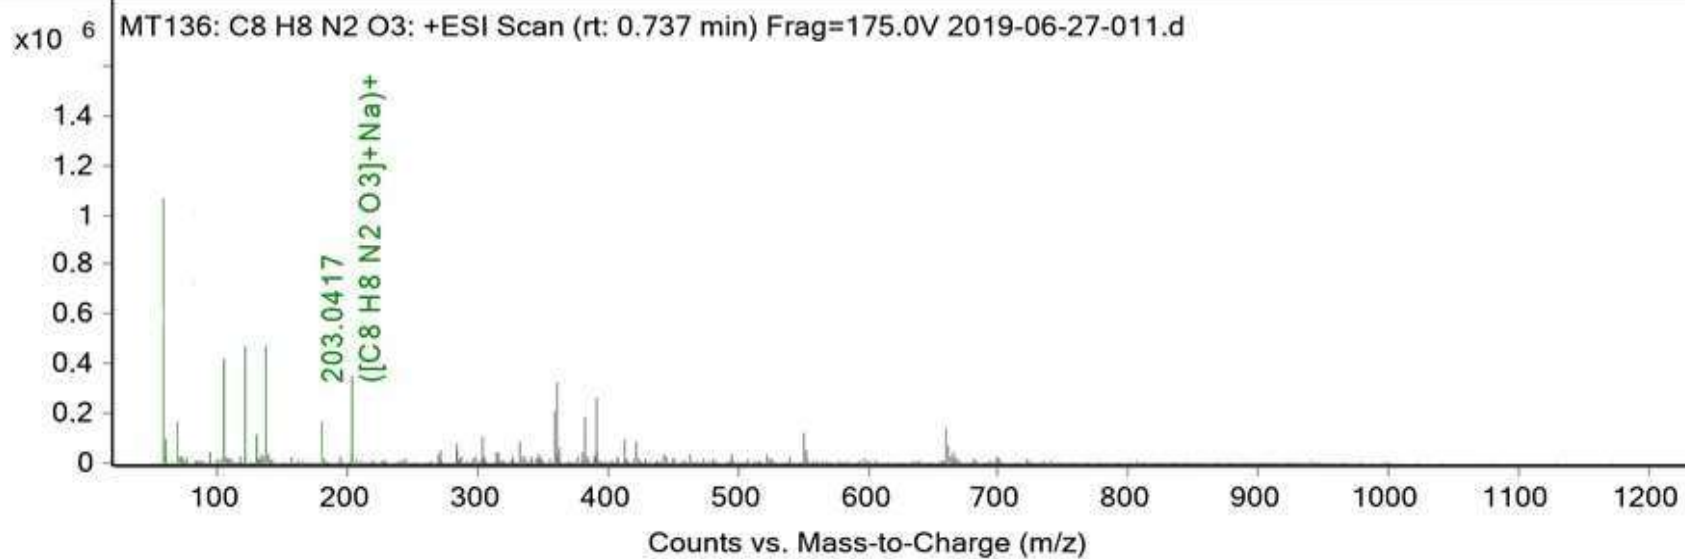

<sup>1</sup>H NMR

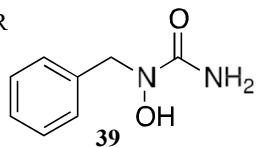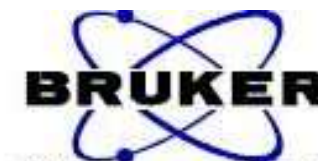

```
NAME           Moh RX
EXPNO           426
PROCNO          1
Date_           20190702
Time            10.20
INSTRUM         spect
PROBHD          5 mm PABBO BB-
PULPROC         zg30
TD              65536
SOLVENT         DMSO
NS              16
DS              2
SWH             8223.685 Hz
FIDRES         0.125483 Hz
AQ             3.9846387 sec
RG             114
DW             60.800 usec
DE             6.50 usec
TE             298.0 K
D1             1.00000000 sec
TD0            1
```

```
----- CHANNEL f1 -----
NUC1            1H
P1              14.07 usec
PL1             0.30 dB
PL1W           11.25229836 W
SFO1           400.1324710 MHz
SI             32768
SF             400.1300000 MHz
WDW             EM
SFB             0
LB             0.30 Hz
GB             0
PC             1.00
```

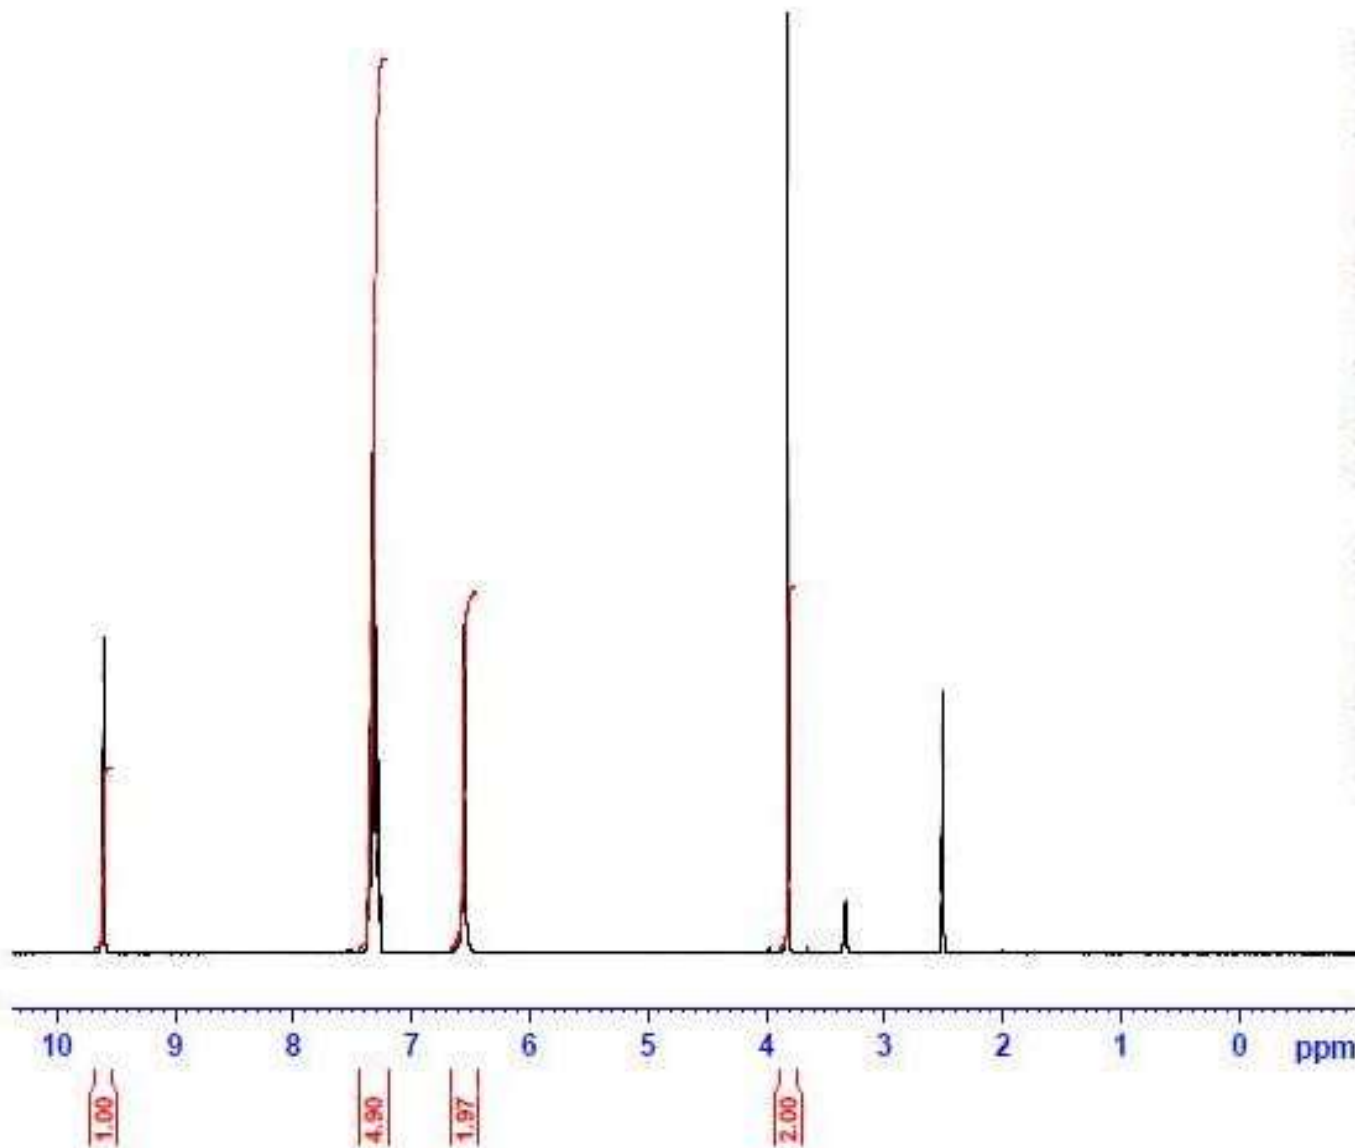

<sup>13</sup>C NMR

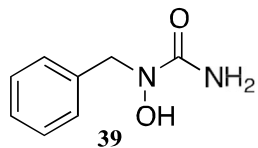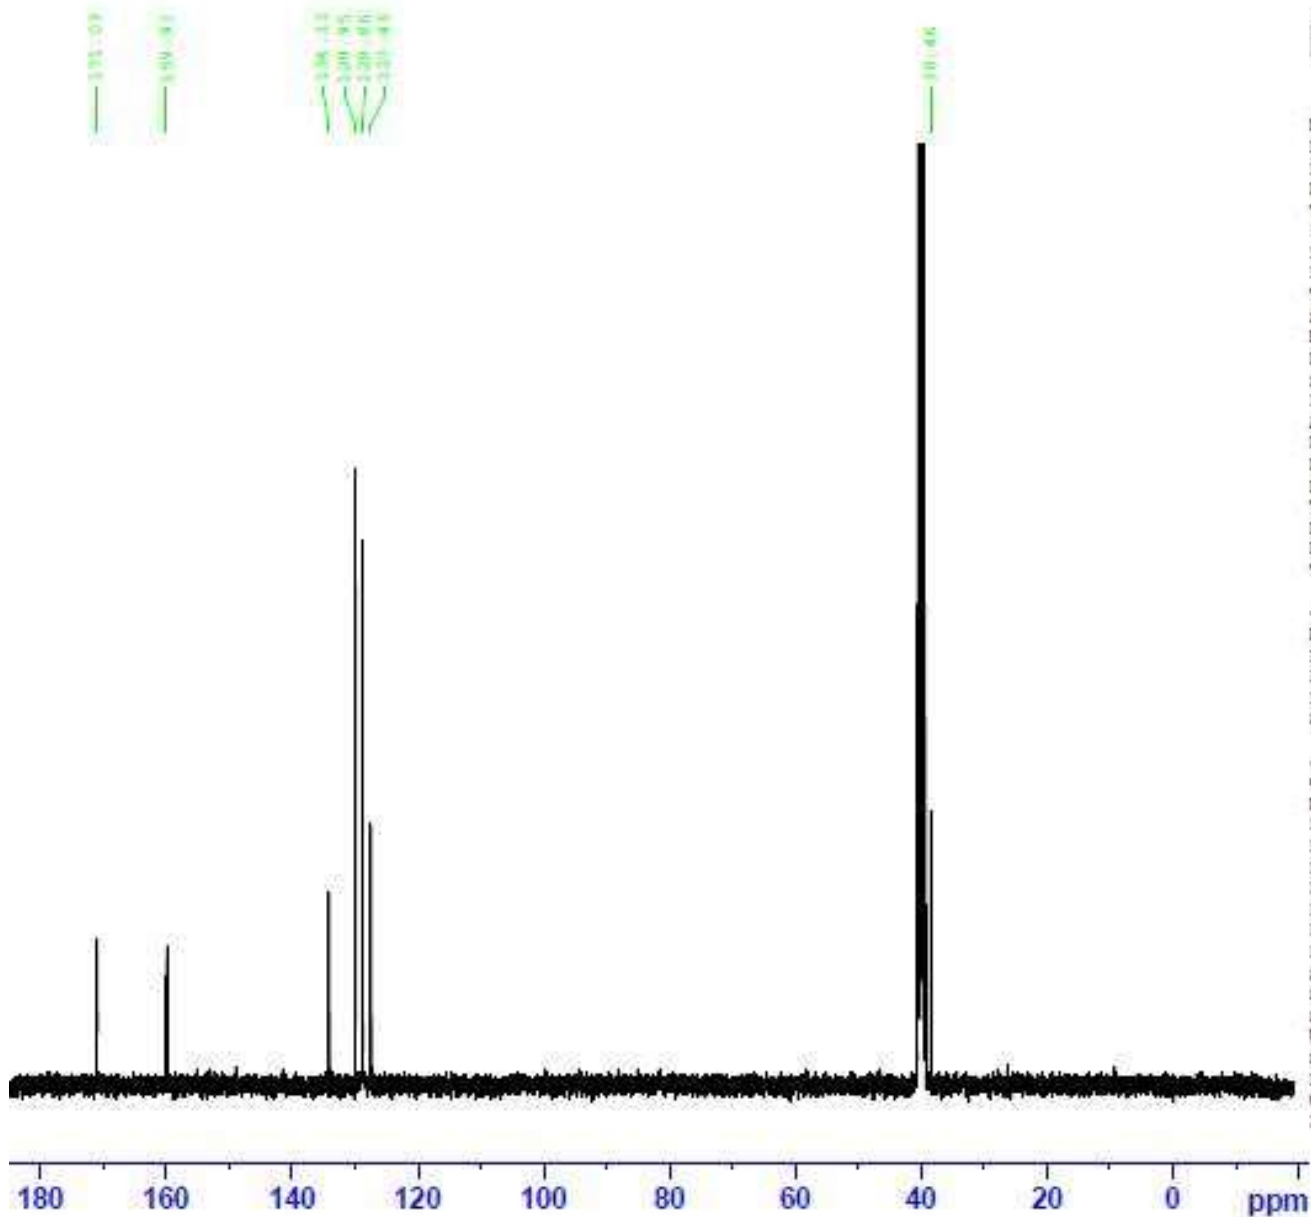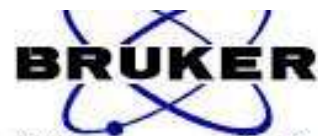

```
NAME           Moh RX
EXPNO           427
PROCNO          1
Date_           20190702
Time_           10.54
INSTRUM         spect
PROBHD          5 mm PABBO BB-
PULPROG         zgpg30
TD              65536
SOLVENT         DMSO
NS              530
DS              4
SWH             24038.461 Hz
FIDRES          0.366798 Hz
AQ             1.3631988 sec
RG              203
DW             20.800 usec
DE             6.50 usec
TE             298.0 K
D1             2.00000000 sec
D11            0.03000000 sec
TD0            1
```

```
----- CHANNEL f1 -----
NUC1            13C
P1              9.90 usec
PL1            -1.90 dB
PL1W           56.02249908 W
SFO1           100.6228298 MHz
```

```
----- CHANNEL f2 -----
CPDPRG2        waltz68
NUC2            1H
PCPD2          80.00 usec
PL2            0.30 dB
PL12           15.40 dB
PL13           18.40 dB
PL2W           11.25229636 W
PL12W          0.34772930 W
PL13W          0.17427748 W
SFO2           400.1316005 MHz
SI             32768
SF             100.6127690 MHz
WDW            EM
SSB            0
LB             1.00 Hz
GB             0
DC             1.40
```

<sup>1</sup>H NMR

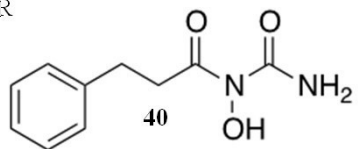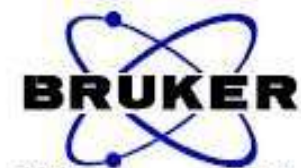

NAME Mob RX  
EXPNO 410  
PROCNO 1  
Date\_ 20190620  
Time\_ 8.51  
INSTRUM spect  
PROBHD 5 mm PABBO BB-  
PULPROG zg30  
TD 65536  
SOLVENT DMSO  
NS 16  
DS 2  
SWH 8223.685 Hz  
FIDRES 0.125483 Hz  
AQ 3.9846387 sec  
RG 101  
DW 60.800 usec  
DE 6.50 usec  
TE 298.0 K  
D1 1.00000000 sec  
TD0 1

----- CHANNEL f1 -----  
NUC1 1H  
P1 14.07 usec  
PL1 0.30 dB  
PL1W 11.25229836 W  
SFO1 400.1324710 MHz  
SI 32768  
SF 400.1300000 MHz  
WDW EM  
SSB 0  
LB 0.30 Hz  
GB 0  
PC 1.00

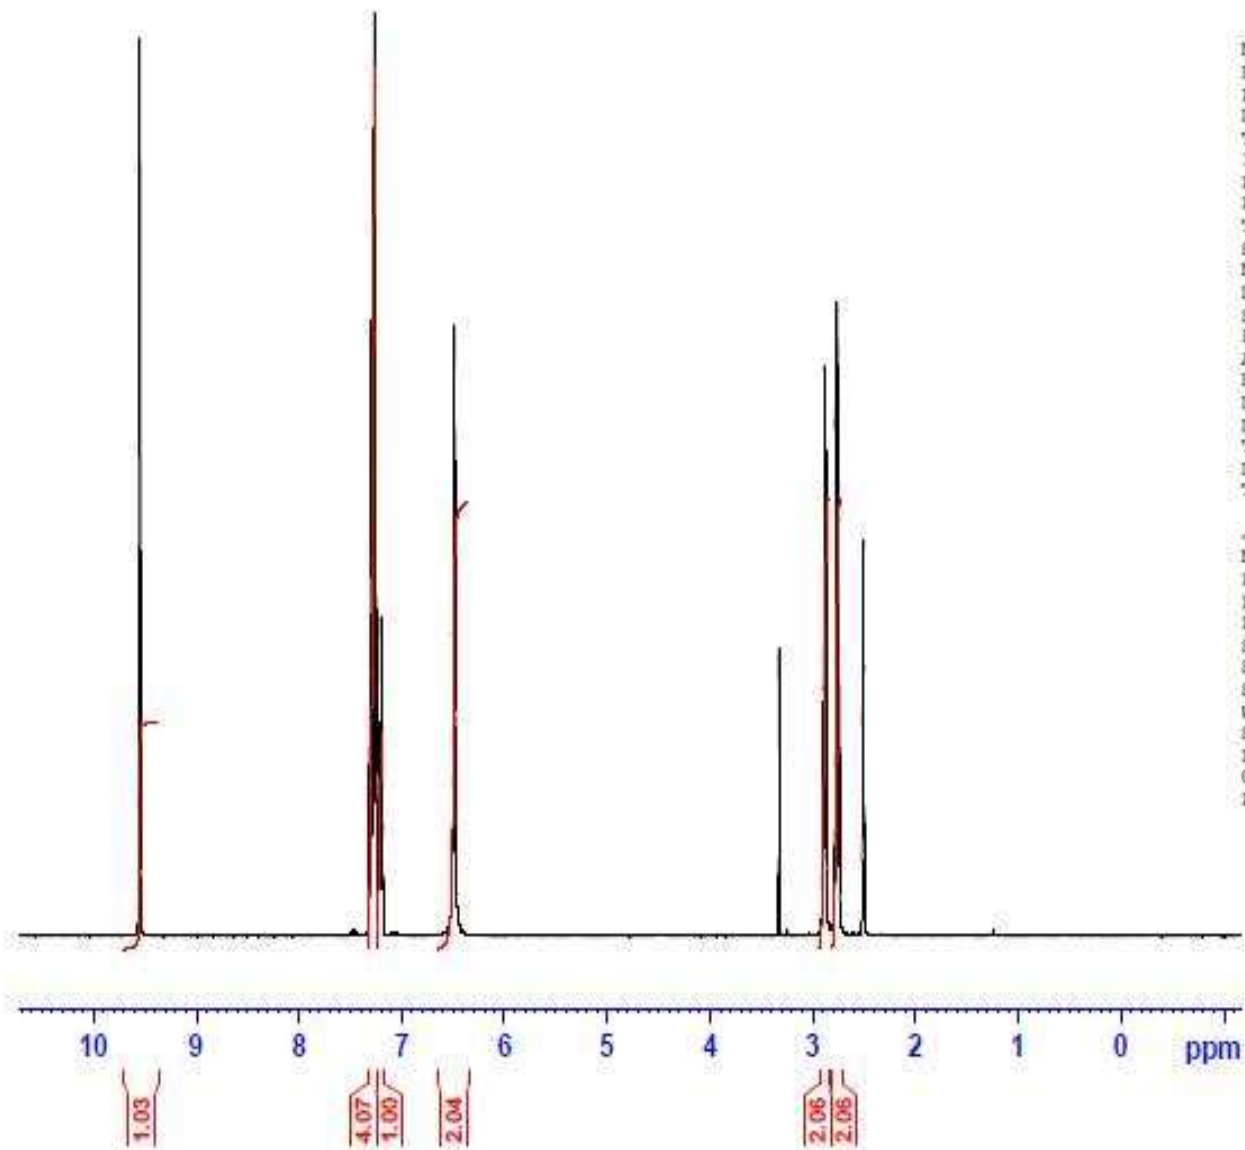

<sup>13</sup>C NMR

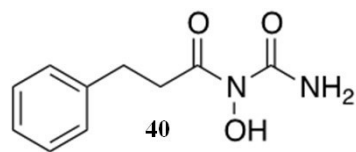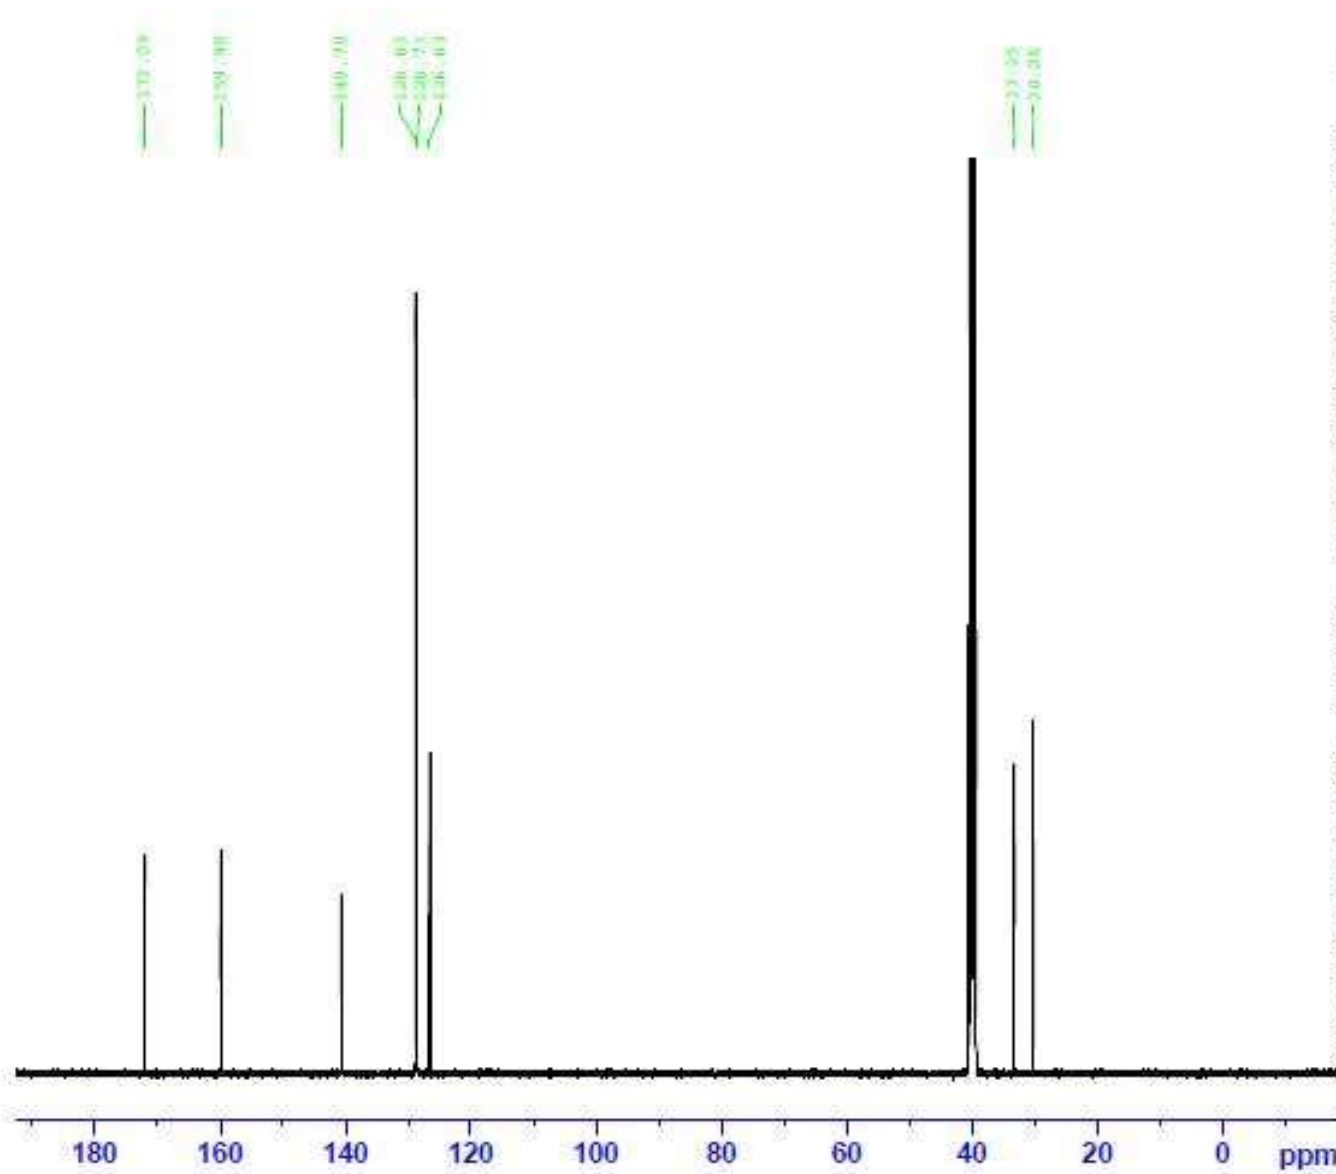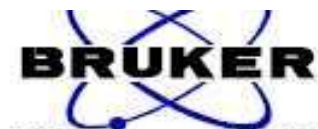

```
NAME           Moh RX
EXPNO           412
PROCNO          1
Date_           20190620
Time            13.39
INSTRUM         spect
PROBHD          5 mm DABBO BB-
PULPROG         zgpg30
TD              65536
SOLVENT         DMSO
NS              4643
DS              4
SWH             24038.461 Hz
FIDRES          0.366798 Hz
AQ             1.3631988 sec
RG              203
LW             20.800 usec
DE              6.50 usec
TE              298.0 K
D1             2.00000000 sec
D11            0.03000000 sec
TDG             1
```

```
----- CHANNEL f1 -----
NUC1            13C
P1              9.90 usec
PL1             -1.90 dB
PL1W           56.02249908 W
SFO1           100.6228298 MHz
```

```
----- CHANNEL f2 -----
CPDPRG2        waltz65
NUC2            1H
PCPD2          80.00 usec
PL2             0.30 dB
PL12           15.40 dB
PL13           18.40 dB
PL2W           11.25229836 W
PL12W          0.34772930 W
PL13W          0.17427748 W
SFO2           400.1316005 MHz
SI             32768
SF             100.6127690 MHz
WDW            EM
SSB            0
LB             1.00 Hz
GB             0
PC             1.40
```

HRMS

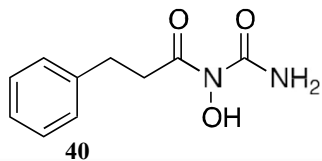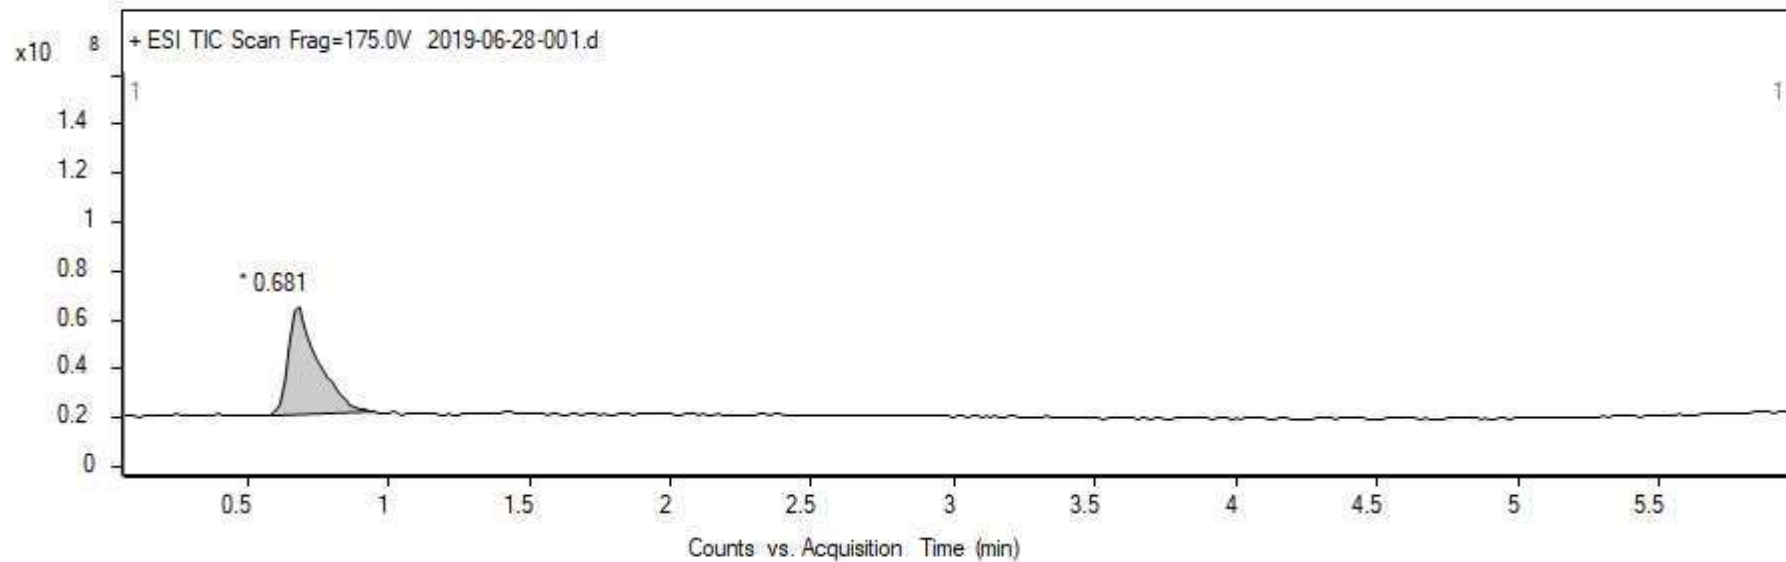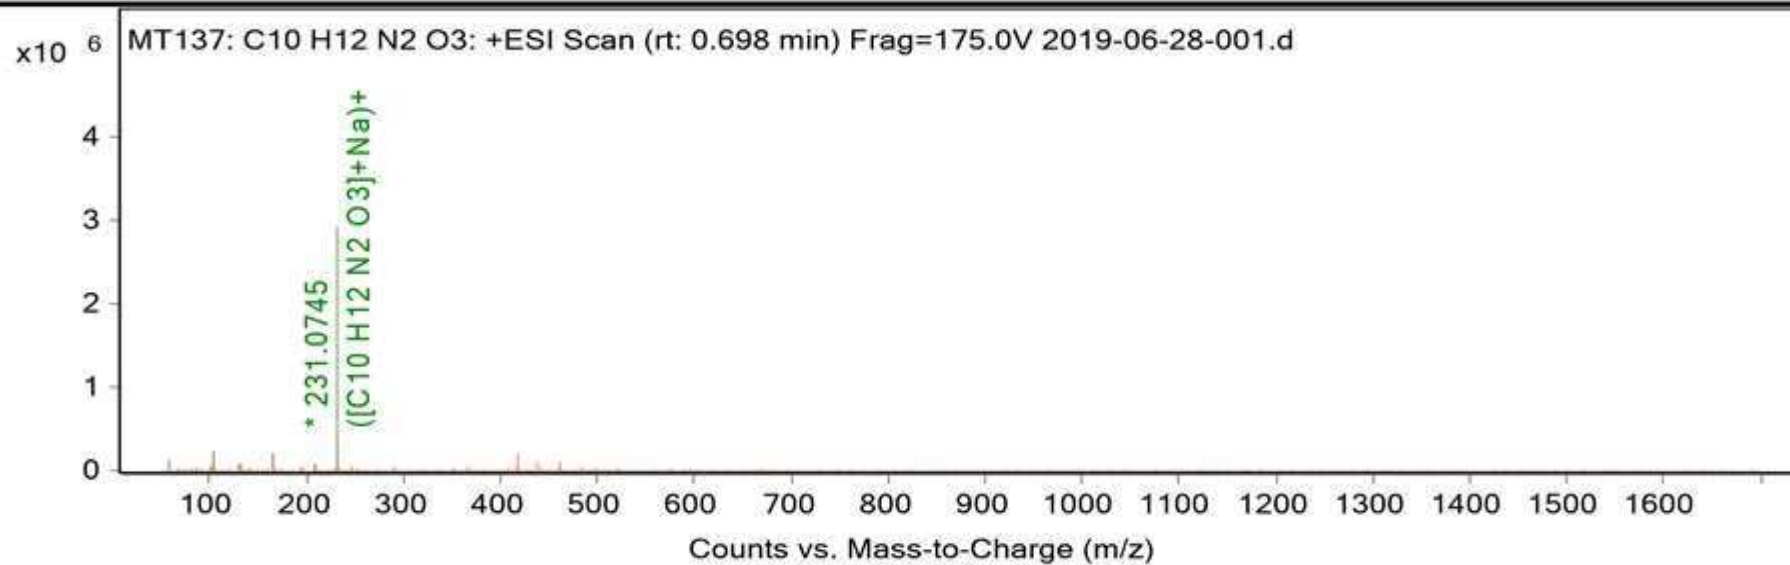

Supplement: molecules-25-04686-s001.pdf [file molecules-25-04686-s001.pdf]
